# Supplementary material for: Single-Molecule Real-Time (SMRT) Full-Length RNA-Sequencing Reveals Novel and Distinct mRNA Isoforms in Human Bone Marrow Cell Subpopulations
Source: MDPI journal article supplement (doi:10.3390/genes10040253), 2019-03-27
Supplement: s1 [file s1]

## SUPPLEMENTAL DATA

### Single molecule real time (SMRT) full length RNA-sequencing reveals novel and distinct mRNA isoforms in human bone marrow cell subpopulations

Anne Deslattes Mays<sup>1</sup>, Marcel O. Schmidt<sup>1</sup>, Garrett T. Graham<sup>1</sup>, Elizabeth Tseng<sup>2</sup>, Primo Baybayan<sup>2</sup>, Robert Sebra<sup>3</sup>, Miloslav Sanda<sup>1</sup>, Jean-Baptiste Mazarati<sup>1,4</sup>, Anna T. Riegel<sup>1</sup>, and Anton Wellstein<sup>1\*</sup>

#### Contents:

- Supplemental Experimental and Computational Procedures
  - Supplemental References
  - Supplemental Figures S1 to Fig S6
  - **A separate file contains Tables S1 to S12: "Deslattes Genes Tables S1 to S12 March 18 2019.xlsx"**
- Table S1: Top five transcript isoform counts for genes with 2 to 16 exons (Fig. 5b)  
Table S2: Transcript ID, gene names, detection of peptides by mass spectrometry (Fig. 5b and Table S1).  
Table S3: Number of exons, transcript isoform numbers (Trans #) for genes in Fig. 5a.  
Table S4: Number of exons, transcript isoform numbers (Trans #) for genes in Fig. 5c.  
Table S5: Distribution of exon counts and transcript isoform frequency.  
Table S6: Validation of the transcript isoforms.  
Table S7: MatchAnnot analysis of isoform alignments.  
Table S8: Supporting evidence for novel transcript isoforms of EEF1A1 using SQANTI2 and CAGE.  
Table S9: Supporting evidence for novel transcript isoforms of ANXA1 using SQANTI2 and CAGE.  
Table S10: Supporting evidence for exon-exon junctions in EEF1A1 with public RNAseq data.  
Table S11: Supporting evidence for exon-exon junctions in ANXA1 with public RNAseq data.  
Table S12: NCBI accession numbers

## Supplemental Experimental and Computational Procedures

SQANTI2 is a private github repository of Elizabeth Tseng (co-author of this manuscript) and is a modification of the original SQANTI by the Ana Conesa Lab (1).

CAGE Peak data is from Fantom5 (2).

Intropolis is a list of exon-exon junctions across 21,5004 human RNA-seq from the Sequence Read Archive from spliced read alignment to hg19 with Rail-RNA (3).

### Scripts:

#### Transcriptome Alignment and Assembly from Illumina Data.

The specific qsub command for the total bone marrow (T) alignment was:

```
#!/bin/bash
#$ -cwd
#$ -pe orte 32
#$ -N "th.fr.unstr.tot"
#$ -V
export PATH="/mnt/myenv2/bin:/mydata/cufflinks-2.2.1.Linux_x86_64:/mydata/bowtie2-2.2.5:/mydata/samtools-1.2:$PATH"
/mydata/tophat-2.0.14.Linux_x86_64/tophat2 -p 32 -G /results/Homo_sapiens/UCSC/hg19/Annotation/Genes/genes.gtf \
-r200 \
--library-type fr-unstranded \
-o /trimmed_fastq/transcriptome/ill.bm.total/tophat.2.0.14.fr-unstranded.gtf \
/results/Homo_sapiens/UCSC/hg19/Sequence/Bowtie2Index/genome \
/trimmed_fastq/trimmed.fasta.total.bm.non.ss/bm.trimmed.reads.1.fa \
/trimmed_fastq/trimmed.fasta.total.bm.non.ss/bm.trimmed.reads.2.fa
```

The specific command for cufflinks 2 assembly for total bone marrow (T) was:

```
#!/bin/bash
#$ -cwd
#$ -pe orte 32
#$ -N "cf2.tot.fr.un.gtf"
#$ -V
export PATH="/mnt/myenv2/bin:/mydata/cufflinks-2.2.1.Linux_x86_64:/mydata/bowtie2-2.2.1:/mydata/samtools-0.1.19:$PATH"
/mydata/cufflinks-2.2.1.Linux_x86_64/cufflinks -b /results/Homo_sapiens/UCSC/hg19/Sequence/WholeGenomeFasta/genome.fa \
-p 32 \
-g /results/Homo_sapiens/UCSC/hg19/Annotation/Genes/genes.gtf \
-L tot.fr.unstranded.gtf \
-o /trimmed_fastq/transcriptome/ill.bm.total/cufflinks2.2.1.tophat.2.0.14.fr.unstranded.gtf.5.19 \
/trimmed_fastq/transcriptome/ill.bm.total/tophat.2.0.14.fr-unstranded.gtf/accepted_hits.bam
```

The specific qsub command for the lineage-negative (N) alignment was:

```
#!/bin/bash
```

```

##$ -cwd
##$ -pe orte 32
##$ -N "th.neg.gtf"
##$ -V
export PATH="/mnt/myenv2/bin:/mydata/cufflinks-2.2.1.Linux_x86_64:/mydata/bowtie2-2.2.5:/mydata/samtools-1.2:$PATH"
/usr/local/bin/tophat -p 32 -G /results/Homo_sapiens/UCSC/hg19/Annotation/Genes/genes.gtf \
--library-type fr-firststrand \
-r200 \
-o /trimmed_fastq/transcriptome/ill.lin.neg/tophat.2.0.14.fr.firststrand.no.mm.gtf \
/results/Homo_sapiens/UCSC/hg19/Sequence/Bowtie2Index/genome \
/trimmed_fastq/trimmed.fasta.lin.neg.ss/lin.neg.trimmed.reads.1.fa \
/trimmed_fastq/trimmed.fasta.lin.neg.ss/lin.neg.trimmed.reads.2.fa

```

The specific command for cufflinks 2 assembly for lineage-negative (N) was:

```

#!/bin/bash
##$ -cwd
##$ -pe orte 32
##$ -N "cf2.ill.lin.neg.gtf"
##$ -V
export PATH="/mnt/myenv2/bin:/mydata/cufflinks-2.2.1.Linux_x86_64:/mydata/bowtie2-2.2.1:/mydata/samtools-0.1.19:$PATH"
/mydata/cufflinks-2.2.1.Linux_x86_64/cufflinks -b /results/Homo_sapiens/UCSC/hg19/Sequence/WholeGenomeFasta/genome.fa \
-p 32 \
-g /results/Homo_sapiens/UCSC/hg19/Annotation/Genes/genes.gtf \
-L ill.lin.neg.nm.th \
-o /trimmed_fastq/transcriptome/ill.lin.neg/cufflinks2.2.1.no.mm.no.u.gtf \
/trimmed_fastq/transcriptome/ill.lin.neg/tophat.2.0.14.fr.firststrand.no.mm/accepted_hits.bam

```

### Analysis of full length transcript by ToFU:

All processing was done on an amazon cloud instant on which the SMRTAnalysis software was first installed followed by installing the then referred to cDNA\_primer prebam version of ToFU.

Before running the `tofu_wrap.py` software, these files needed to be prepared.

1. CircularConsensus.sh to obtain circular consensus reads (ccs) from movie files
2. Classify to obtain Full length non-chimeric reads (FL) and non-full length (nFL) ccs reads

The ccs reads now classified into FL and nFL are then converted from fastq to fasta files.

So that prior to running `tofu_wrap.py`, one has:

1. Isoseq\_nfl.fasta (nFL) ccs reads
2. Isoseq\_flnc.fasta (FL)
3. Input.fofn (quality information from the movie files)
4. Reads\_of\_insert.fofn (the ccs reads listed as file names)
5. Reference database (hg19)

Then, the ToFU step of final assembly is accomplished with:

```
tofu_wrap.py --nfl_fa isoseq_nfl.fasta \  
--ccs_fofn reads_of_insert.fofn --bas_fofn input.fofn \  
-d clusterOut --quiver --use_sge --max_sge_jobs 120 \  
--gmap_db /home/UNIXHOME/etseng/share/gmap_db_new/ \  
--gmap_name hg19 \  
--output_seqid_prefix tissue1  
isoseq_flnc.fasta final.consensus.fa
```

### Confirmation of novel transcript isoforms with blast

To confirm novel transcripts isoforms, two blastable databases were prepared separately for the total bone marrow (total.bm.non.ss) and lineage-negative short read RNA sequences (lin.neg.ss) using the example script below. The full length RNA-seq reads for each gene was split into single sequence files then batch blasted in a script such as this used for *ANXA1*:

```
#!/bin/bash  
  
endings="aa ab ac ad ae af ag ah ai aj ak al am an ao ap aq ar as at au av aw ax ay az  
      ba bb bc bd be bf bg bh bi bj bk bl bm bn bo bp bq br bs bt bu bv bw bx by bz  
      ca cb cc cd ce cf cg ch ci cj ck cl cm cn co"  
  
#rm ANXA1.lin.neg.coverage.txt  
#rm ANXA1.total.coverage.txt  
  
for end in $endings;  
do  
    echo ANXA1.split."$end"  
    blastn -db ../lin.neg.ss/lin.neg.ss -perc_identity 99 -ungapped -num_threads 32 -max_target_seqs 10000 -query  
ANXA1.split."$end" -outfmt "6 qseqid qstart qend \  
qseq sseq sseqid sstart send" -out ANXA1.split."$end".lin.neg.out  
    blastn -db ../total.bm.non.ss/total.bm.non.ss -perc_identity 99 -ungapped -num_threads 32 -max_target_seqs 10000 -  
query ANXA1.split."$end" -outfmt "6 qseqid \  
qstart qend qseq sseq sseqid sstart send" -out ANXA1.split."$end".total.out  
done
```

Using this output file, a *summarize* script provides the coverage.

```
#!/bin/bash  
  
endings="aa ab ac ad ae af ag ah ai aj ak al am an ao ap aq ar as at au av  
ba bb bc bd be bf bg bh bi bj bk bl bm bn bo bp bq br bs bt bu bv  
ca cb cc cd ce cf cg ch ci cj ck cl cm cn co"  
  
for end in endings  
do  
    echo ANXA1.split."$end"  
    var=$(grep ">" ANXA1.split."$end"  
    var2=${var:1}  
    echo "$var2"  
    grep "$var2" ANXA1.split."$end".lin.neg.out | cut -c -20 > ANXA1.split."$end".lin.neg.num.txt  
    sort -n -k 2,3 ANXA1.split."$end".lin.neg.num.txt > ANXA1."$end" > . "$var2".lin.neg.txt
```

```

sort -n -k 2,3 ANXA1.split."$end".lin.neg.out > ANXA1."$end". "$var2".lin.neg.fa.txt
cat ANXA1."$end" . "$var2".lin.neg.txt >> ANXA1.lin.neg.coverage.txt
grep "$var2" ANXA1.split."$end".total.out | cut -c -20 >ANXA1.split."$end".total.num.txt
sort -n -k 2,3 ANXA1.split."$end".total.num.txt >ANXA1."$end". "$var2".total.txts
sort -n -k 2,3 ANXA1.split."$end".total.out > ANXA1."$end"."$var2".total.fa.txt
cat ANXA1."$end"."$var2".total.txt >> ANXA1.total.coverage.txt
done

```

*Summarize* finds the matches and prepares the coverage file. Next, a series of *awk* scripts find the gaps in coverage as a result of the blast and limits the hits to 100 bp.

The output of the short reads that match each of the novel isoforms were then searched for the full length reads. All genes followed the same stepwise procedure.

step 1 - Simplify the blast output capturing the ends of the hit, and the length of the overlap.

```

cat ANXA1.total.coverage.txt | awk '{print $1 "\t" $2 "\t" $3 "\t" $3-$2+1}' >ANXA1.total.coverage.maths.txt

```

Ensure the hits are at least 100 bp

```

grep "100" ANXA1.total.coverage.maths.txt > ANXA1.total.100.coverage.maths.txt

```

step 2 - preserving the end of the previous line, this awk script identifies gaps.

```

cat ANXA1.total.100.coverage.maths.txt | awk '{print var "\t" $1 "\t" $2 "\t" $3 "\t" $4 "\t" var-$2;var=$3}' >
ANXA1.total.100.coverage.all.txt

```

step 3 - use the end of the match from the previous line to determine if there is a gap

```

grep "\-" ANXA1.total.coverage.all.txt

```

The specific command for the Sqanti2 package was:

```
python ~/GitHub/SQANTI2/sqanti_qc2.py -t 30 53A_negative.good.5merge.collapsed.longest_rep.fa
gencode.v29.annotation.gtf /pbi/dept/bifx/etseng/genomes/hg38/hg38_noalt.fa --cage_peak
~/share/FANTOM/hg38.cage_peak_phase1and2combined_coord.bed -c
"Public_Intronpolis/*count_10.*modified" --polyA_motif_list polyA.list
...
"polyA.list"
...
aataaa
attaaa
agtaaa
tataaa
cataaa
gataaa
aatata
aataca
aataga
aaaaag
actaaa
aagaaa
aatgaa
tttaaa
aaaaca
ggggct
...
```

## Supplemental References

1. Tardaguila, M., de la Fuente, L., Marti C., Pereira, C., Pardo-Palacios, F.J., Del Risco, H., Ferrell, M., Mellado, M., Macchietto, M., Verheggen, K., Edelmann, M., Ezkurdia, I., Vazquez, J., Tress, M., Mortazavi, A., Martens, L., Rodriguez-Navarro, S., Moreno-Manzano, V., Conesa, A. (2018) SQANTI: extensive characterization of long-read transcript sequences for quality control in full-length transcriptome identification and quantification. *Genome Res.* **28**, 396-411
2. Lizio, M, et al. (2015) Gateways to the FANTOM5 promoter level mammalian expression atlas. *Genome Biology* **16**, 22
3. Nellore, A., et al. (2016) Human splicing diversity and the extent of unannotated splice junctions across human RNA-seq samples on the Sequence Read Archive. *Genome Biology* **17**, 266
4. Shilov, I. V., Seymour, S. L., Patel, A. A., Loboda, A., Tang, W. H., Keating, S. P., Hunter, C. L., Nuwaysir, L. M., and Schaeffer, D. A. (2007) The Paragon Algorithm, a Next Generation Search Engine That Uses Sequence Temperature Values and Feature Probabilities to Identify Peptides from Tandem Mass Spectra. *Molecular & Cellular Proteomics*. **6**, 1638–1655
5. Tang, W. H., Shilov, I. V., and Seymour, S. L. (2008) Nonlinear fitting method for determining local false discovery rates from decoy database searches. *J Proteome Res.* **7**, 3661–3667

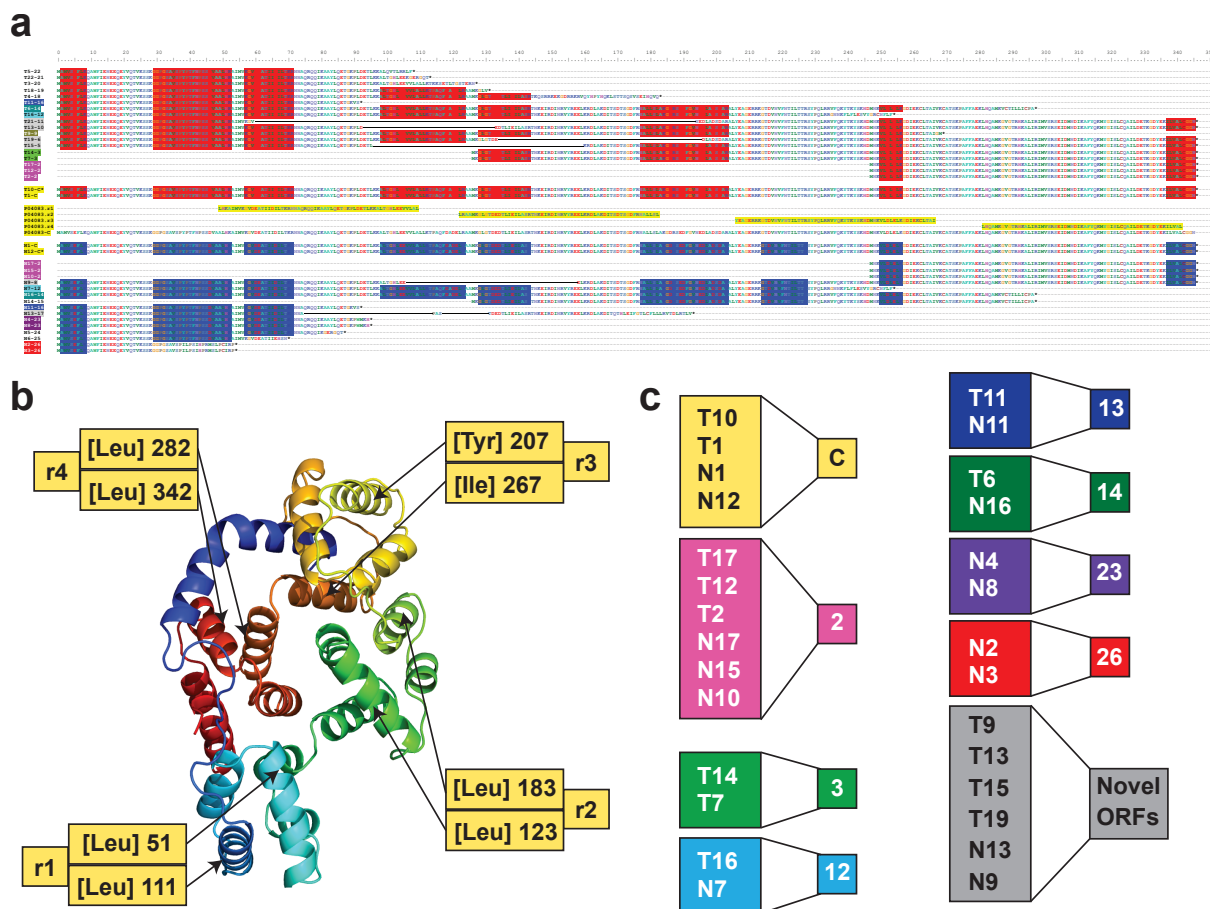

**Figure S1.** Amino acid sequence alignment and proteins predicted from the transcript isoforms identified for *ANXA1* (see **Fig. 4c,d**). **(a)** Amino acid sequence alignments including the isoform identifiers. The canonical protein and conserved repeat domains r1 - r4 are highlighted in yellow. ORFs coding for the same protein are shown in matching colors. Note: Solid lines connecting protein fragments indicate contiguous amino acid sequences predicted from the respective transcript isoform. **(b)** Predicted protein structure of the canonical *ANXA1* protein P04083 with repeat domains r1 to r4 indicated. **(c)** Common predicted proteins for groups of transcript isoforms, ORFs 2, 3, 12, 13, 14, 23, 26 and the canonical ORF (C) are listed and shown with the respective color from panel (a). Novel ORFs are indicated.

(A magnified portion of Figure S1a is on the next page.)

|           | 0      | 10            | 20         | 30       | 40         | 50      | 60    | 70     | 80            |            |
|-----------|--------|---------------|------------|----------|------------|---------|-------|--------|---------------|------------|
| T5-22     | MAMVS  | FLRQAWFIENEEQ | EYVQTVKSSK | GGPGSAVS | SPYPTFNPSS | VAALHKA | IMVKG | ATII   | ILTKRNNAQRQ   | IKAAYLQETG |
| T22-21    | MAMVS  | FLRQAWFIENEEQ | EYVQTVKSSK | GGPGSAVS | SPYPTFNPSS | VAALHKA | IMVKG | ATII   | ILTKRNNAQRQ   | IKAAYLQETG |
| T3-20     | MAMVS  | FLRQAWFIENEEQ | EYVQTVKSSK | GGPGSAVS | SPYPTFNPSS | VAALHKA | IMVKG | ATII   | ILTKRNNAQRQ   | IKAAYLQETG |
| T18-19    | MAMVS  | FLRQAWFIENEEQ | EYVQTVKSSK | GGPGSAVS | SPYPTFNPSS | VAALHKA | IMVKG | ATII   | ILTKRNNAQRQ   | IKAAYLQETG |
| T4-18     | MAMVS  | FLRQAWFIENEEQ | EYVQTVKSSK | GGPGSAVS | SPYPTFNPSS | VAALHKA | IMVKG | ATII   | ILTKRNNAQRQ   | IKAAYLQETG |
| T11-16    | MAMVS  | FLRQAWFIENEEQ | EYVQTVKSSK | GGPGSAVS | SPYPTFNPSS | VAALHKA | IMVKG | ATII   | ILTKRNNAQRQ   | IKAAYLQETG |
| T6-14     | MAMVS  | FLRQAWFIENEEQ | EYVQTVKSSK | GGPGSAVS | SPYPTFNPSS | VAALHKA | IMVKG | ATII   | ILTKRNNAQRQ   | IKAAYLQETG |
| T16-12    | MAMVS  | FLRQAWFIENEEQ | EYVQTVKSSK | GGPGSAVS | SPYPTFNPSS | VAALHKA | IMVKG | ATII   | ILTKRNNAQRQ   | IKAAYLQETG |
| T21-11    | MAMVS  | FLRQAWFIENEEQ | EYVQTVKSSK | GGPGSAVS | SPYPTFNPSS | VAALHKA | IMVKG |        |               |            |
| T13-10    | MAMVS  | FLRQAWFIENEEQ | EYVQTVKSSK | GGPGSAVS | SPYPTFNPSS | VAALHKA | IMVKG | ATII   | ILTKRNNAQRQ   | IKAAYLQETG |
| T9-9      | MAMVS  | FLRQAWFIENEEQ | EYVQTVKSSK | GGPGSAVS | SPYPTFNPSS | VAALHKA | IMVKG | ATII   | ILTKRNNAQRQ   | IKAAYLQETG |
| T19-6     | MAMVS  | FLRQAWFIENEEQ | EYVQTVKSSK | GGPGSAVS | SPYPTFNPSS | VAALHKA | IMVKG | ATII   | ILTKRNNAQRQ   | IKAAYLQETG |
| T15-5     | MAMVS  | FLRQAWFIENEEQ | EYVQTVKSSK | GGPGSAVS | SPYPTFNPSS | VAALHKA | IMVKG | ATII   | ILTKRNNAQRQ   | IKAAYLQETG |
| T14-3     |        |               |            |          |            |         |       |        |               |            |
| T7-3      |        |               |            |          |            |         |       |        |               |            |
| T17-2     |        |               |            |          |            |         |       |        |               |            |
| T12-2     |        |               |            |          |            |         |       |        |               |            |
| T2-2      |        |               |            |          |            |         |       |        |               |            |
| T10-C*    | MAMVS  | FLRQAWFIENEEQ | EYVQTVKSSK | GGPGSAVS | SPYPTFNPSS | VAALHKA | IMVKG | ATII   | ILTKRNNAQRQ   | IKAAYLQETG |
| T1-C      | MAMVS  | FLRQAWFIENEEQ | EYVQTVKSSK | GGPGSAVS | SPYPTFNPSS | VAALHKA | IMVKG | ATII   | ILTKRNNAQRQ   | IKAAYLQETG |
| P04083.r1 |        |               |            |          |            |         |       |        |               |            |
| P04083.r2 |        |               |            |          |            |         |       |        |               |            |
| P04083.r3 |        |               |            |          |            |         |       |        |               |            |
| P04083.r4 |        |               |            |          |            |         |       |        |               |            |
| P04083-C  | MAMVSE | FLRQAWFIENEEQ | EYVQTVKSSK | GGPGSAVS | SPYPTFNPSS | VAALHKA | IMVKG | DEATI  | IDILTKRNNAQRQ | IKAAYLQETG |
| N1-C      | MAMVSE | FLRQAWFIENEEQ | EYVQTVKSSK | GGPGSAVS | SPYPTFNPSS | VAALHKA | IMV   | GDEATI | IDILTKRNNAQRQ | IKAAYLQETG |
| N12-C*    | MAMVSE | FLRQAWFIENEEQ | EYVQTVKSSK | GGPGSAVS | SPYPTFNPSS | VAALHKA | IMV   | GDEATI | IDILTKRNNAQRQ | IKAAYLQETG |
| N17-2     |        |               |            |          |            |         |       |        |               |            |
| N15-2     |        |               |            |          |            |         |       |        |               |            |
| N10-2     |        |               |            |          |            |         |       |        |               |            |
| N9-8      | MAMVSE | FLRQAWFIENEEQ | EYVQTVKSSK | GGPGSAVS | SPYPTFNPSS | VAALHKA | IMV   | GDEATI | IDILTKRNNAQRQ | IKAAYLQETG |
| N7-12     | MAMVSE | FLRQAWFIENEEQ | EYVQTVKSSK | GGPGSAVS | SPYPTFNPSS | VAALHKA | IMV   | GDEATI | IDILTKRNNAQRQ | IKAAYLQETG |
| N16-14    | MAMVSE | FLRQAWFIENEEQ | EYVQTVKSSK | GGPGSAVS | SPYPTFNPSS | VAALHKA | IMV   | GDEATI | IDILTKRNNAQRQ | IKAAYLQETG |
| N14-15    |        |               |            |          |            |         |       |        |               |            |
| N11-16    | MAMVSE | FLRQAWFIENEEQ | EYVQTVKSSK | GGPGSAVS | SPYPTFNPSS | VAALHKA | IMV   | GDEATI | IDILTKRNNAQRQ | IKAAYLQETG |
| N13-17    | MAMVSE | FLRQAWFIENEEQ | EYVQTVKSSK | GGPGSAVS | SPYPTFNPSS | VAALHKA | IMV   | GDEATI | IDILTKRNNAQRQ | IKAAYLQETG |
| N4-23     | MAMVSE | FLRQAWFIENEEQ | EYVQTVKSSK | GGPGSAVS | SPYPTFNPSS | VAALHKA | IMV   | GDEATI | IDILTKRNNAQRQ | IKAAYLQETG |
| N8-23     | MAMVSE | FLRQAWFIENEEQ | EYVQTVKSSK | GGPGSAVS | SPYPTFNPSS | VAALHKA | IMV   | GDEATI | IDILTK        |            |

S8



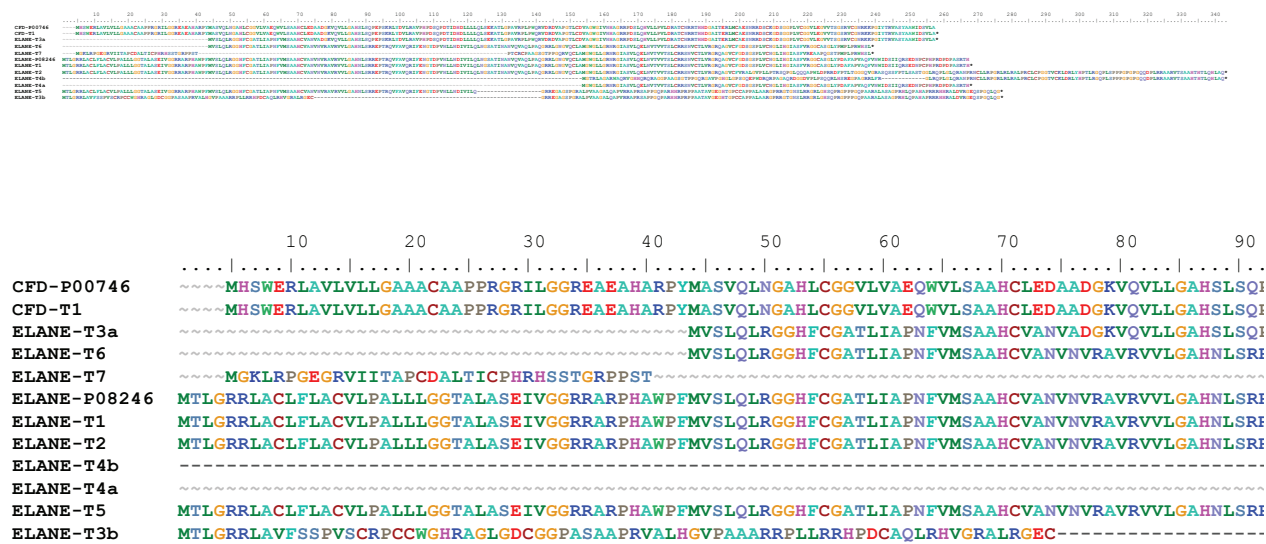

**Figure S2.** Multiple amino acid sequence alignment predicted from transcript isoforms for *ELANE* and *CFD*. The alignment is shown in the top panel. The identifiers of the transcript isoforms are included.

For better readability a magnified portion of the figure is shown as the bottom panel.

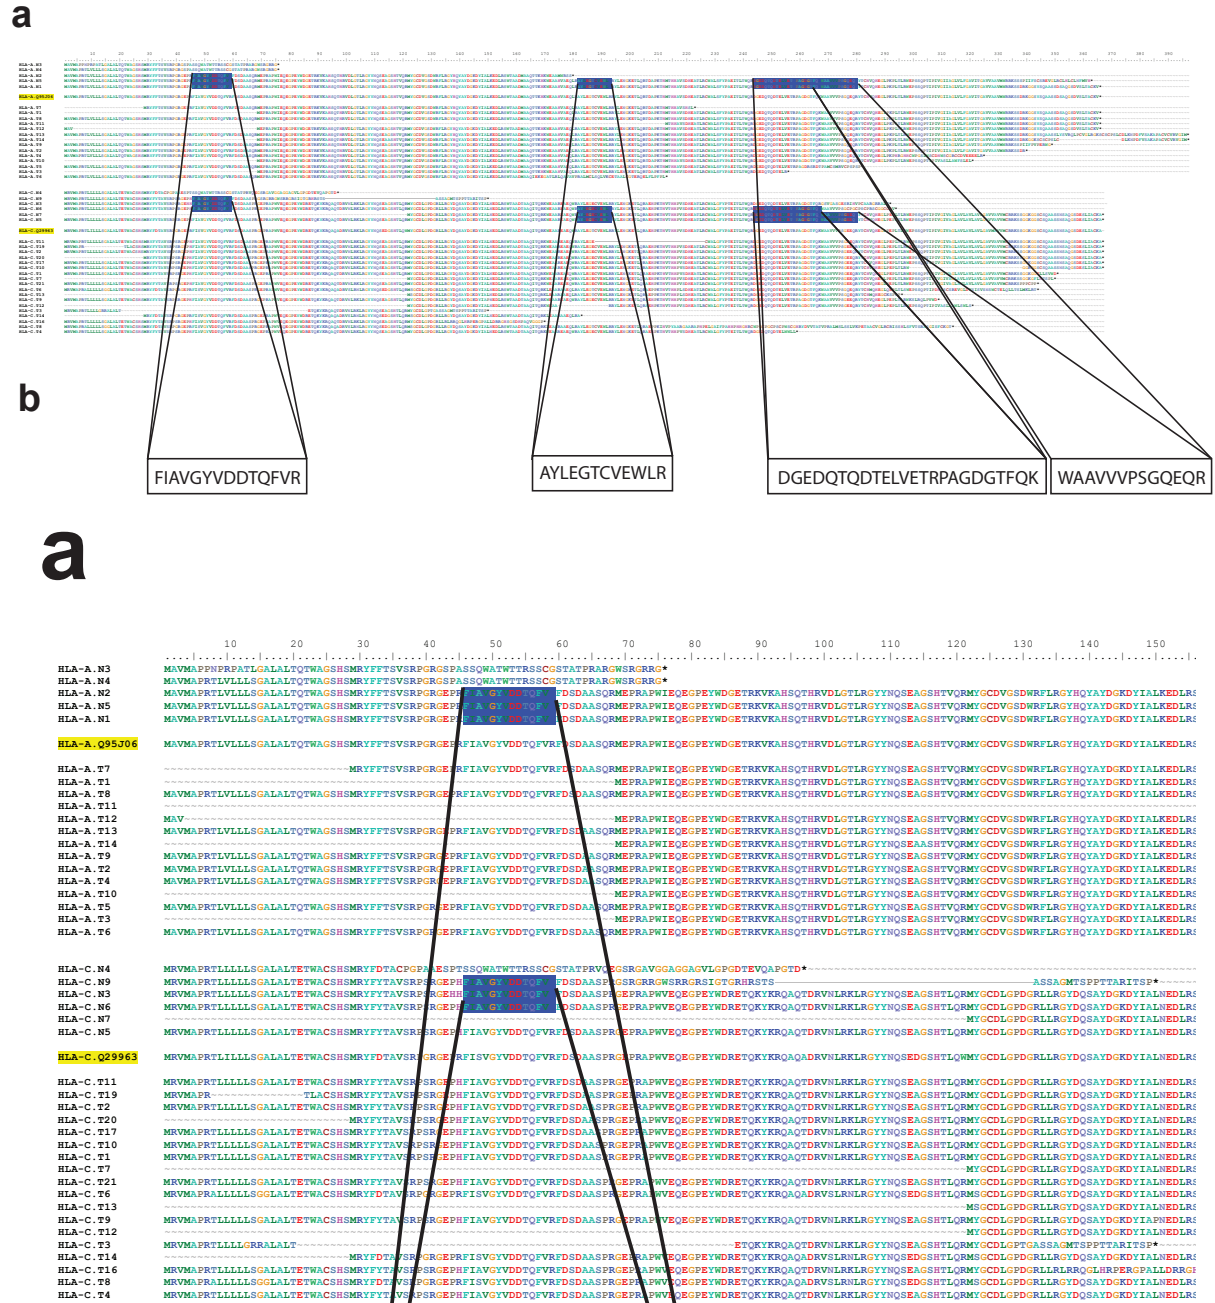

**Figure S3.** Multiple amino acid sequence alignment (**a**) and mass spectrometry detected peptides (**b**) for *HLA-A*, *-B* and *-C* transcripts. (**a**) Sequences predicted from transcript isoforms of *HLA-A*, *HLA-B* and *HLA-C*. The identifiers of the transcript isoforms are included. Canonical amino acid sequences are highlighted in yellow. (**b**) Peptide fragments identified by mass spectrometry analysis of tryptic fragments of proteins extracted from lin-neg bone marrow cells. The spectra are shown in Fig. 5d-f.

For better readability a magnified portion of Fig S3a is shown in the bottom panel

## a lineage-negative bone marrow cells

### Distinct Peptide Level FDR Analysis

Peptides Identified at Critical False Discovery Rates

| Number of Peptides Identified |             |             |                     |
|-------------------------------|-------------|-------------|---------------------|
| Critical FDR                  | Local FDR   | Global FDR  | Global FDR from Fit |
| <b>1.0%</b>                   | <i>1672</i> | <i>2152</i> | <b>2223</b>         |
| <b>5.0%</b>                   | <b>2080</b> | <i>2740</i> | <i>2792</i>         |
| <b>10.0%</b>                  | <b>2252</b> | <i>3341</i> | <i>3106</i>         |

\* It is recommended you use numbers in bold and avoid using numbers in italics.

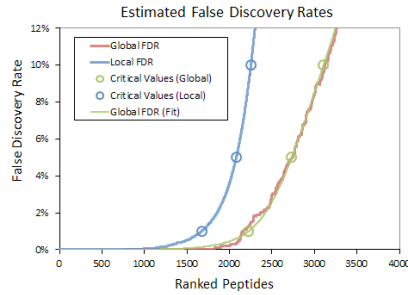

Correspondence between FDR Levels and ProteinPilot Reported Confidences

| Corresponding ProteinPilot Confidence |              |              |                     |
|---------------------------------------|--------------|--------------|---------------------|
| Critical FDR                          | Local FDR    | Global FDR   | Global FDR from Fit |
| <b>1.0%</b>                           | <i>95.5%</i> | <i>95.0%</i> | <b>92.4%</b>        |
| <b>5.0%</b>                           | <b>96.7%</b> | <i>56.6%</i> | <i>57.1%</i>        |
| <b>10.0%</b>                          | <b>91.2%</b> | <i>37.8%</i> | <i>38.5%</i>        |

\* It is recommended you use numbers in bold and avoid using numbers in italics.

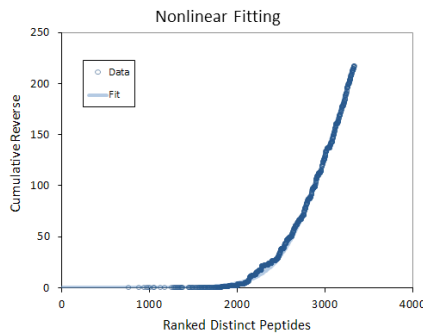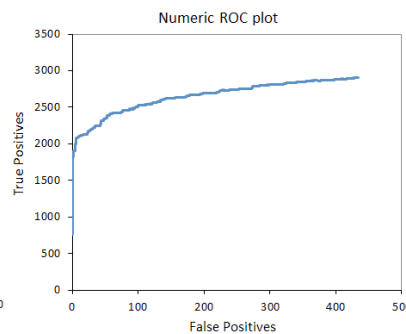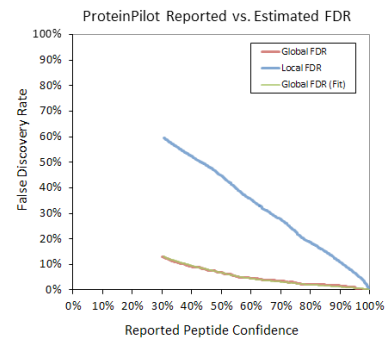

## b lineage-positive bone marrow cells

### Distinct Peptide Level FDR Analysis

Peptides Identified at Critical False Discovery Rates

| Number of Peptides Identified |            |             |                     |
|-------------------------------|------------|-------------|---------------------|
| Critical FDR                  | Local FDR  | Global FDR  | Global FDR from Fit |
| <b>1.0%</b>                   | <i>891</i> | <i>983</i>  | <b>983</b>          |
| <b>5.0%</b>                   | <b>924</b> | <i>1160</i> | <i>1138</i>         |
| <b>10.0%</b>                  | <b>940</b> | <i>1434</i> | <i>1223</i>         |

\* It is recommended you use numbers in bold and avoid using numbers in italics.

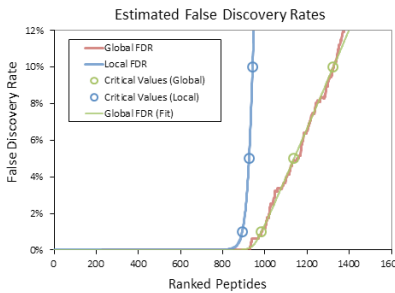

Correspondence between FDR Levels and ProteinPilot Reported Confidences

| Corresponding ProteinPilot Confidence |              |              |                     |
|---------------------------------------|--------------|--------------|---------------------|
| Critical FDR                          | Local FDR    | Global FDR   | Global FDR from Fit |
| <b>1.0%</b>                           | <i>92.7%</i> | <i>93.6%</i> | <b>93.6%</b>        |
| <b>5.0%</b>                           | <b>96.9%</b> | <i>69.2%</i> | <i>72.7%</i>        |
| <b>10.0%</b>                          | <b>96.0%</b> | <i>48.7%</i> | <i>49.0%</i>        |

\* It is recommended you use numbers in bold and avoid using numbers in italics.

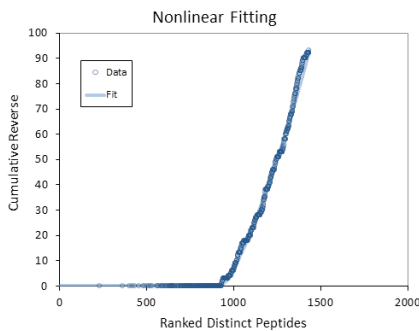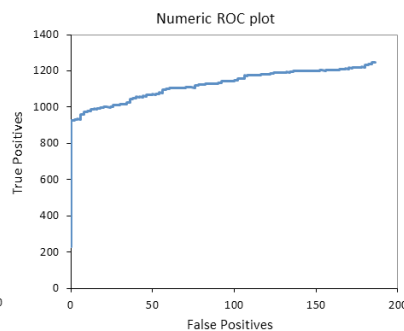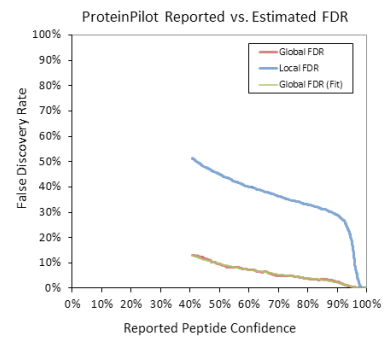

**Figure S4.** Summary of the false discovery rate (FDRs) of the shotgun mass spectrometry of proteins extracted from bone marrow-derived cells. FDR analysis was performed on the ProteinPilot platform (4, 5). The cutoff for positive peptide identification was set at an FDR < 1%. The graphs and tables represent the overview of the proteomics analysis of lineage-negative (**a**) and lineage-positive (**b**) bone marrow cells.

**Figure S5.** Blast alignment of EEF1A1 novel transcripts with NCBI EST repository

copied below

**Figure S6.** Blast alignment of ANXA1 novel transcripts with NCBI EST repository

copied further below

RID: 8PV46HTU015

| Sequences producing significant alignments: |                   |                                               |      |     | Score<br>(Bits) | E | Max<br>ident |
|---------------------------------------------|-------------------|-----------------------------------------------|------|-----|-----------------|---|--------------|
| BX421307.2                                  | BX421307          | Homo sapiens B CELLS (RAMOS CELL LINE) Hom... | 1622 | 0.0 | 100%            |   |              |
| BX443032.2                                  | BX443032          | Homo sapiens B CELLS (RAMOS CELL LINE) Hom... | 1618 | 0.0 | 100%            |   |              |
| BY794942.2                                  | BY794942          | Homo sapiens eye Homo sapiens cDNA clone H... | 1616 | 0.0 | 100%            |   |              |
| BX417098.2                                  | BX417098          | Homo sapiens PLACENTA Homo sapiens cDNA cl... | 1615 | 0.0 | 100%            |   |              |
| DC527884.1                                  | DC527884          | chimpanzee skin cDNA library PstA Pan trog... | 1611 | 0.0 | 100%            |   |              |
| BX441194.2                                  | BX441194          | Homo sapiens FETAL BRAIN Homo sapiens cDNA... | 1611 | 0.0 | 100%            |   |              |
| AF541984.3                                  | AF541984          | Homo sapiens PLACENTA Homo sapiens cDNA cl... | 1609 | 0.0 | 100%            |   |              |
| U0409312.1                                  | AGENSCOUT_6795094 | NIH MGC_85 Homo sapiens cDNA clone            | 1607 | 0.0 | 100%            |   |              |
| BX417528.2                                  | BX417528          | Homo sapiens PLACENTA Homo sapiens cDNA cl... | 1604 | 0.0 | 100%            |   |              |
| BM477666.1                                  | AGENSCOUT_6482916 | NIH MGC_85 Homo sapiens cDNA clone            | 1602 | 0.0 | 100%            |   |              |

|            |      |                                                                                                                                                         |      |
|------------|------|---------------------------------------------------------------------------------------------------------------------------------------------------------|------|
| Query      | 3    | TTTTTCGCACGGGTTTGCCGCAACACAGGTGTCGTGAAATACCCCTAAAGCCAAATGGGAAGGAAAGACTCATATCAACATTGTCGTCAATTGGACACGTAGATTCTGGGCAAGTCCACCCTACTGGCCATCTGATCTATA           | 152  |
| BY794942.2 | 25   | .....                                                                                                                                                   | 155  |
| DC527884.1 | 9    | .....                                                                                                                                                   | 158  |
| Query      | 153  | AATGGCGTGGCATCGACAAAGAACCATTGAAAAATTTGAGAAGGAGGCTGCTGAGATGGGAAGGGCTCCTTCAAGTATGCCTGGGCTTTGGATAAAGCTGAAAGCTGAGCGTGAACGTGGTATCACCATTTGATATCTCCTTTGTGGAAT  | 302  |
| BY794942.2 | 156  | .....                                                                                                                                                   | 305  |
| DC527884.1 | 159  | .....T.....                                                                                                                                             | 308  |
| Query      | 303  | TTGAGACCAGCAAGTACTATGTGACTATCATTGATGCCCCAGGACAGACAGACTTTATCAAAACATGATTACAGGGACATCTCAGGCTGACTGTGCTGTCTGATTGTTGCTGCTGGTGTGGTGAATTTGAAGCTGGTATCTCCAAGA     | 455  |
| BY794942.2 | 306  | .....                                                                                                                                                   | 455  |
| DC527884.1 | 309  | .....C.....                                                                                                                                             | 458  |
| Query      | 453  | ATGGGCAGACCCGAGAGCATGCCCTTCTGGCTTACACACTGGGTGTGAAACAATAATTGTCGGTGTAAACAAATGGATTCCACTGAGCCACCCTACAGCCAGAAGATATGAGGAATTTGTAAGGAAGTCAGCACTTACATTAAAG       | 602  |
| BY794942.2 | 456  | .....                                                                                                                                                   | 605  |
| DC527884.1 | 459  | .....                                                                                                                                                   | 608  |
| Query      | 603  | AAATTGGCTACAACCCGACACAGTAGCATTTTGTGCCAATTCTCTGGTTGGAATGGTGACAACATGCTGGAGCCAAGTGCTAACATGCCTTGGTTCAAGGGATGGAAAGTCACCCGTAAGGATGGCAATGCCAGTGAACCAACGCTGCTTG | 752  |
| BY794942.2 | 606  | .....                                                                                                                                                   | 755  |
| DC527884.1 | 609  | .....                                                                                                                                                   | 758  |
| AL541984.3 | 1    | .....                                                                                                                                                   | 24   |
| Query      | 757  | AGGCTCTGGACTGGTGTTCTCAAACCCGGTATGGTGGTCACCTTTGCTCCAGCTCAAGCTTACACGGAAGTAAATCTGTGAAATGCACCATGAAGCTTTGAGTGAAGCTCTCTCTGGGACAAATGTTGGGCTTCAATGTCAGAATGTTG   | 902  |
| BX421307.2 | 23   | .....                                                                                                                                                   | 168  |
| BX443032.2 | 53   | .....                                                                                                                                                   | 194  |
| BY794942.2 | 756  | .....M.....                                                                                                                                             | 768  |
| BY794942.2 | 871  | .....                                                                                                                                                   | 1012 |
| BX417098.2 | 16   | .....                                                                                                                                                   | 157  |
| DC527884.1 | 874  | .....                                                                                                                                                   | 1015 |
| DC527884.1 | 759  | .....                                                                                                                                                   | 771  |
| BX441194.2 | 65   | .....W.....                                                                                                                                             | 206  |
| AL541984.3 | 140  | .....                                                                                                                                                   | 281  |
| AL541984.3 | 25   | .....                                                                                                                                                   | 37   |
| BQ049312.1 | 25   | .....                                                                                                                                                   | 166  |
| BX417528.2 | 32   | .....                                                                                                                                                   | 173  |
| BM477966.1 | 9    | .....                                                                                                                                                   | 150  |
| Query      | 903  | CTGTCTAAGGATGTGCTCGTGGCAAGCTTCTGGTGACAGCAAAATGACCCCAATGGAAGCAGCTGCTTCACTGCTCAGGTGATTATCTCTGAACCATCCAGGCCAAATAGCGCCGGCTATGCCCTGTATTGGATTGCCACAG          | 1052 |
| BX421307.2 | 169  | .....                                                                                                                                                   | 318  |
| BX443032.2 | 195  | .....                                                                                                                                                   | 344  |
| BY794942.2 | 1013 | .....                                                                                                                                                   | 1163 |
|            |      | .....<br>G                                                                                                                                              |      |
| BX417098.2 | 158  | .....                                                                                                                                                   | 307  |
| DC527884.1 | 1016 | .....                                                                                                                                                   | 1165 |
| BX441194.2 | 207  | .....                                                                                                                                                   | 356  |
| AL541984.3 | 282  | .....                                                                                                                                                   | 431  |
| BQ049312.1 | 167  | .....                                                                                                                                                   | 316  |
| BX417528.2 | 174  | .....                                                                                                                                                   | 323  |
| BM477966.1 | 151  | .....                                                                                                                                                   | 303  |

|            |      |                                                                                                                                                         |      |
|------------|------|---------------------------------------------------------------------------------------------------------------------------------------------------------|------|
| Query      | 1053 | GCTCACATTGCATGCAAGTTTGTCTGAGCTGAAGGAAAAATTGATCGCCGTTCTGGTAAAAAGCTGGAAGATGGCCCTAAATTTCTGAAGTCTGGTGATGCTGCCATTGTTGATATGGTTCCTGGCAAGCCCATGTGTGTTGAGAGCTTC  | 1202 |
| BX421307.2 | 319  | .....                                                                                                                                                   | 468  |
| BX443032.2 | 345  | .....                                                                                                                                                   | 494  |
| BY794942.2 | 1164 | .....                                                                                                                                                   | 1313 |
| BX417098.2 | 308  | .....                                                                                                                                                   | 457  |
| DC527884.1 | 1166 | .....                                                                                                                                                   | 1315 |
| BX441194.2 | 357  | .....                                                                                                                                                   | 506  |
| AL541984.3 | 432  | .....                                                                                                                                                   | 581  |
| BQ049312.1 | 317  | .....                                                                                                                                                   | 466  |
| BX417528.2 | 324  | .....                                                                                                                                                   | 473  |
| BM477966.1 | 301  | .....                                                                                                                                                   | 450  |
|            |      |                                                                                                                                                         |      |
| Query      | 1203 | TCAGACTATCCACCTTTGGGTCGCTTTGCTGTTGCTGATATGAGACAGACAGTTGCGGTGGGTGTCTCAAAAGCAGTGGACAAGAAGCTGCTGGAGCTGGCAAGTCAACCAAGTCTGCCAGAAAGCTCAGAAGCTAAATGAATATTA     | 1352 |
| BX421307.2 | 469  | .....                                                                                                                                                   | 618  |
| BX443032.2 | 495  | .....                                                                                                                                                   | 644  |
| BY794942.2 | 1314 | .....                                                                                                                                                   | 1463 |
| BX417098.2 | 458  | .....                                                                                                                                                   | 607  |
| DC527884.1 | 1316 | .....A.....                                                                                                                                             | 1465 |
| BX441194.2 | 507  | .....                                                                                                                                                   | 656  |
| AL541984.3 | 582  | .....                                                                                                                                                   | 731  |
| BQ049312.1 | 467  | .....                                                                                                                                                   | 616  |
| BX417528.2 | 474  | .....                                                                                                                                                   | 623  |
| BM477966.1 | 451  | .....                                                                                                                                                   | 600  |
|            |      |                                                                                                                                                         |      |
| Query      | 1353 | TCCCTAATACCTGCCACCCCACTCTTAATCAGTGGTGGGAAGACGGTCTCAGAACTGTTTGTTCATTTGGCCATTTAAAGTTTAGTAGTAAAAGACTGGTAAATGATAACAATGCATCGTAAACCTTCAGAAGGAAAGGAGAAATggtttt | 1502 |
| BX421307.2 | 619  | .....                                                                                                                                                   | 768  |
| BX443032.2 | 645  | .....                                                                                                                                                   | 794  |
| BY794942.2 | 1464 | .....                                                                                                                                                   | 1613 |
| BX417098.2 | 608  | .....                                                                                                                                                   | 757  |
| DC527884.1 | 1466 | .....C.....                                                                                                                                             | 1615 |
| BX441194.2 | 657  | .....                                                                                                                                                   | 806  |
| AL541984.3 | 732  | .....                                                                                                                                                   | 881  |
| BQ049312.1 | 617  | .....                                                                                                                                                   | 766  |
| BX417528.2 | 624  | .....T.....                                                                                                                                             | 773  |
| BM477966.1 | 601  | .....                                                                                                                                                   | 750  |
|            |      |                                                                                                                                                         |      |
| Query      | 1503 | gtggaccactttggttttcttttgcgtgtggcagttttaagtattagtttttaaaatcagtagtcttttaATGGAAACAACCTTGACCAAAAATTTGTACAGAAATTTTGGAGCCCATTAAGAAAGTTAAATGAG                 | 1638 |
| BX421307.2 | 769  | .....                                                                                                                                                   | 904  |
| BX443032.2 | 795  | .....                                                                                                                                                   | 930  |
| BY794942.2 | 1614 | .....                                                                                                                                                   | 1749 |
| BX417098.2 | 758  | .....                                                                                                                                                   | 892  |
| DC527884.1 | 1616 | .....                                                                                                                                                   | 1751 |
| BX441194.2 | 807  | .....                                                                                                                                                   | 941  |
| AL541984.3 | 882  | .....K.S.....                                                                                                                                           | 1018 |
|            |      |                                                                                                                                                         |      |
| BQ049312.1 | 767  | .....M.....T.....                                                                                                                                       | 901  |
|            |      |                                                                                                                                                         |      |
| BX417528.2 | 774  | .....A.....                                                                                                                                             | 907  |
| BM477966.1 | 751  | .....N...A.....                                                                                                                                         | 883  |

Query= T2-C\* [organism=Homo sapiens] eef1a1

Length=1742

| Sequences producing significant alignments: |                                                        | Score<br>(Bits) | E<br>Value | Max<br>ident |
|---------------------------------------------|--------------------------------------------------------|-----------------|------------|--------------|
| DC527884.1                                  | DC527884 chimpanzee skin cDNA library PstA Pan trog... | 3193            | 0.0        | 100%         |
| BY794942.2                                  | BY794942 Homo sapiens eye Homo sapiens cDNA clone H... | 3175            | 0.0        | 100%         |
| CF111220.1                                  | Shultzomica04471 Rat lung airway and parenchyma cDN... | 2361            | 0.0        | 91%          |
| BX426149.2                                  | BX426149 Homo sapiens NEUROBLASTOMA Homo sapiens cD... | 2146            | 0.0        | 99%          |
| CO001006.1                                  | OC028 pre-oestrus adult sheep ovary library Ovis ar... | 2050            | 0.0        | 93%          |
| BX418564.2                                  | BX418564 Homo sapiens FETAL BRAIN Homo sapiens cDNA... | 2047            | 0.0        | 97%          |
| BX426150.2                                  | BX426150 Homo sapiens NEUROBLASTOMA Homo sapiens cD... | 2037            | 0.0        | 99%          |
| AL567209.3                                  | AL567209 Homo sapiens FETAL BRAIN Homo sapiens cDNA... | 2001            | 0.0        | 98%          |
| BX440470.1                                  | BX440470 Homo sapiens FETAL BRAIN Homo sapiens cDNA... | 1999            | 0.0        | 98%          |
| BU902062.1                                  | AGENCOURT_10127553 NIH_MGC_71 Homo sapiens cDNA clo... | 1999            | 0.0        | 98%          |

# ALIGNMENTS

|            |    |                                                                                                                                                     |     |
|------------|----|-----------------------------------------------------------------------------------------------------------------------------------------------------|-----|
| Query      | 2  | TTTTTCGCAACGGGTTTGCCGCCAGACACAGGTGTCGTGAAAACCTACCCCTAAAAGCCAAAATGGGAAGGAAAAGACTCATATCAACATTGTCGTGATTGGACACGTAGATTGGGCAAGTCCACCACTACTGCCATCTGATCTATA | 151 |
| DC527884.1 | 9  | .....                                                                                                                                               | 158 |
| BY794942.2 | 25 | .....                                                                                                                                               | 155 |
| CF111220.1 | 7  | .....T.....G.....T.....G.C...G.....A.....C.....C.....A.....C.....C.....C.....                                                                       | 151 |
|            |    |                                                                                                                                                     |     |
|            |    | .....T.....G.....T.....G.C...G.....A.....C.....C.....A.....C.....C.....C.....                                                                       |     |

|            |      |                                                                                                                                                         |                                                             |                                                                 |      |  |
|------------|------|---------------------------------------------------------------------------------------------------------------------------------------------------------|-------------------------------------------------------------|-----------------------------------------------------------------|------|--|
|            |      |                                                                                                                                                         | A                                                           | ATTC                                                            |      |  |
| BX426150.2 | 1    |                                                                                                                                                         | ..T.....                                                    | .....                                                           | 126  |  |
| BU902062.1 | 1    |                                                                                                                                                         | .....                                                       | .....                                                           | 137  |  |
| Query      | 152  | AATGCGGTGGCATCGACAAAAGAACCATTGAAAAATTTGAGAAGGAGGCTGCTGAGATGGGAAAGGCTCCTCAAGTATGCCTGGGCTTTGGATAAACTGAAAGCTGAGCGTGAACGTGGTATCACCATTGATATCTCCTTTGGGAAAT    |                                                             |                                                                 | 301  |  |
| DC527884.1 | 159  | .....                                                                                                                                                   | .....                                                       | .....T.....                                                     | 308  |  |
| BY794942.2 | 156  | .....                                                                                                                                                   | .....                                                       | .....                                                           | 305  |  |
| CF111220.1 | 152  | .....T.....A.....                                                                                                                                       | .....G.....                                                 | .....G.....A.....C.....C.....G.....T.....C.....C.....G.....     | 301  |  |
| BX426150.2 | 127  | .....                                                                                                                                                   | .....                                                       | .....                                                           | 276  |  |
| BU902062.1 | 138  | .....                                                                                                                                                   | .....                                                       | .....                                                           | 287  |  |
| Query      | 302  | TTGAGACCAGCAAGTACTATGTGACTATCATTTGATGCCCCAGGACACAGAGACTTTATCAAAAACATGATTACAGGGACATCTCAGGCTGACTGTGCTGCTGATTGTTGCTGCTGGTGTGGTGAATTTGAAGCTGGTATCTCCAAGA    |                                                             |                                                                 | 451  |  |
| DC527884.1 | 309  | .....                                                                                                                                                   | .....C.....                                                 | .....                                                           | 458  |  |
| BY794942.2 | 306  | .....                                                                                                                                                   | .....                                                       | .....                                                           | 455  |  |
| CF111220.1 | 302  | .....                                                                                                                                                   | .....C.....G.....                                           | .....G.....C.....                                               | 451  |  |
| CO001006.1 | 1464 | .....                                                                                                                                                   | .....T.....C.....                                           | .....C.....C.....C.....                                         | 1317 |  |
| BX426150.2 | 277  | .....                                                                                                                                                   | .....                                                       | .....                                                           | 426  |  |
| BU902062.1 | 288  | .....                                                                                                                                                   | .....                                                       | .....                                                           | 437  |  |
| Query      | 452  | ATGGGCAGACCCGAGAGCATGCCCTTCTGGCTTACACACTGGGTGTGAACAACATAATTGTCGGTGTAAACAAAATGGATTCCACTGAGCCACCTTACAGCCAGAAGAGATATGAGGAAATTTGTTAAGGAAGTCAGCACTTACATTAAAG |                                                             |                                                                 | 601  |  |
| DC527884.1 | 459  | .....                                                                                                                                                   | .....                                                       | .....                                                           | 608  |  |
| BY794942.2 | 456  | .....                                                                                                                                                   | .....                                                       | .....                                                           | 605  |  |
| CF111220.1 | 452  | .....C.....T.....T.....                                                                                                                                 | .....TT.....                                                | .....G.....T.....C.....A.....T.....C.....C.....C.....           | 601  |  |
| BX426149.2 | 1196 | .....                                                                                                                                                   | .....                                                       | .....-A.....-A.....                                             | 1121 |  |
| CO001006.1 | 1316 | .....C.....T.....                                                                                                                                       | .....C.....                                                 | .....T.....C.....                                               | 1167 |  |
| BX418564.2 | 1196 | .....                                                                                                                                                   | .....                                                       | .....YH.VS.-R.....-W.....G.....W.....-R.....M.....K.....-R..... | 1125 |  |
| BX426150.2 | 427  | .....                                                                                                                                                   | .....                                                       | .....                                                           | 576  |  |
| AL567209.3 | 1145 | .....                                                                                                                                                   | .....                                                       | .....S.....-W.....-K.W.....R.....A.M.C.....                     | 1091 |  |
|            |      |                                                                                                                                                         |                                                             | \                                                               |      |  |
|            |      |                                                                                                                                                         |                                                             | M                                                               |      |  |
| BX440470.1 | 1128 | .....                                                                                                                                                   | .....                                                       | .....                                                           | 1125 |  |
| BU902062.1 | 438  | .....                                                                                                                                                   | .....                                                       | .....                                                           | 587  |  |
| Query      | 602  | AAATTGGCTACAACCCCGACACAGTAGCATTTGTGCCAATTTCTGGTTGGAATGGTGACAACATGCTGGAGCCAAGTGCTAACATGCCCTTGGTTCAAGGGATGGAAGTCAACCGTAAGGATGGCAATGCCAGTGGAAACACGCTGCTTG  |                                                             |                                                                 | 751  |  |
| DC527884.1 | 609  | .....                                                                                                                                                   | .....                                                       | .....                                                           | 758  |  |
| BY794942.2 | 606  | .....                                                                                                                                                   | .....                                                       | .....                                                           | 755  |  |
| CF111220.1 | 602  | .....T.....                                                                                                                                             | .....                                                       | .....T.....G.....C.....A.....G.....C.....G.....                 | 751  |  |
| BX426149.2 | 1120 | .....                                                                                                                                                   | .....                                                       | .....                                                           | 971  |  |
| CO001006.1 | 1166 | .....                                                                                                                                                   | .....C.....                                                 | .....T.....A.....                                               | 1017 |  |
| BX418564.2 | 1124 | .....S.....-R.....-R.....                                                                                                                               | .....                                                       | .....C.....                                                     | 981  |  |
| BX426150.2 | 577  | .....                                                                                                                                                   | .....                                                       | .....                                                           | 726  |  |
| AL567209.3 | 1090 | .....C.....                                                                                                                                             | .....                                                       | .....                                                           | 941  |  |
| BX440470.1 | 1124 | .....-W.....                                                                                                                                            | .....-S.M.....Y.....K.....                                  | .....K.....                                                     | 983  |  |
|            |      |                                                                                                                                                         | \                                                           |                                                                 |      |  |
|            |      |                                                                                                                                                         | C                                                           |                                                                 |      |  |
| BU902062.1 | 588  | .....                                                                                                                                                   | .....                                                       | .....                                                           | 737  |  |
| Query      | 752  | AGGCTCTGGACTGCATCCTACCACCAACTCGTCCAACCTGACAAGCCCTTGGCGCTGCCTCTCCAGGATGTCTACAAAATTTGGTGGTATTGGTACTGTTCCTGTGGCCGAGTGGAGACTGGTGTCTCAAACCCGGTATGGTGGTCAACT  |                                                             |                                                                 | 901  |  |
| DC527884.1 | 759  | .....                                                                                                                                                   | .....                                                       | .....                                                           | 908  |  |
| BY794942.2 | 756  | .....                                                                                                                                                   | .....                                                       | .....                                                           | 905  |  |
| CF111220.1 | 752  | .....A.....T.....T.....G.....G.....                                                                                                                     | .....TC.....A.....C.....                                    | .....T.....C.....C.....C.....G.....A.....T.....T.....           | 901  |  |
| BX426149.2 | 970  | .....                                                                                                                                                   | .....                                                       | .....                                                           | 821  |  |
| CO001006.1 | 1016 | .....A.....T.....G.....                                                                                                                                 | .....C.....A.....TT.....                                    | .....T.....A.....G.....T.....T.....C.....                       | 867  |  |
| BX418564.2 | 980  | .....                                                                                                                                                   | .....C.....                                                 | .....                                                           | 831  |  |
| BX426150.2 | 727  | .....                                                                                                                                                   | .....                                                       | .....                                                           | 876  |  |
| AL567209.3 | 940  | .....K.....                                                                                                                                             | .....                                                       | .....                                                           | 791  |  |
| BX440470.1 | 982  | .....R.....                                                                                                                                             | .....                                                       | .....                                                           | 833  |  |
| BU902062.1 | 738  | .....                                                                                                                                                   | .....                                                       | .....C.....G.....                                               | 887  |  |
| Query      | 902  | TTGCTCCAGTCAACGTTACAACGGAAATGTAATCTGTGAAATGCACCATGAAGCTTTGAGTGAAGCTCTTCCCTGGGGACAATGTGGGCTTCAATGTCAAGAATGTGTCTGTCAAGGATGTTCTGCTGGGCAACGTTGCTGGTGACAGCA  |                                                             |                                                                 | 1051 |  |
| DC527884.1 | 909  | .....                                                                                                                                                   | .....                                                       | .....                                                           | 1058 |  |
| BY794942.2 | 906  | .....                                                                                                                                                   | .....                                                       | .....                                                           | 1055 |  |
| CF111220.1 | 902  | .....T.....A.....T.....C.....G.....G.....                                                                                                               | .....G.....A.....C.....A.....C.....A.....A.....T.....G..... | .....                                                           | 1051 |  |
| BX426149.2 | 820  | .....                                                                                                                                                   | .....                                                       | .....                                                           | 671  |  |
| CO001006.1 | 866  | .....C.....T.....A.....T.....G.....G.....G.....C.....A.....                                                                                             | .....C.....                                                 | .....A.....C.....T.....G.....                                   | 717  |  |
| BX418564.2 | 830  | .....                                                                                                                                                   | .....                                                       | .....                                                           | 681  |  |
| BX426150.2 | 877  | .....                                                                                                                                                   | .....                                                       | .....                                                           | 1025 |  |
|            |      |                                                                                                                                                         | \                                                           |                                                                 |      |  |
|            |      |                                                                                                                                                         | G                                                           |                                                                 |      |  |
| AL567209.3 | 790  | .....                                                                                                                                                   | .....                                                       | .....                                                           | 641  |  |
| BX440470.1 | 832  | .....                                                                                                                                                   | .....                                                       | .....                                                           | 683  |  |
| BU902062.1 | 888  | .....                                                                                                                                                   | .....AC.....                                                | .....C.....C.....C.....C.....                                   | 1037 |  |
|            |      |                                                                                                                                                         |                                                             | \                                                               |      |  |
|            |      |                                                                                                                                                         |                                                             | G                                                               |      |  |
| Query      | 1052 | AAAATGACCCACCAATGGAAGCAGCTGGCTTCACTGTCTCAGGTGATTATCCTGAACCATCCAGGCCAAATAAGCGCCGGCTATGCCCTGTATTGGATTGCCACACGGCTCACATTGCATGCAAGTTTGTCTGAGCTGAAGGAAAAGATTG |                                                             |                                                                 | 1201 |  |
| DC527884.1 | 1059 | .....                                                                                                                                                   | .....                                                       | .....                                                           | 1208 |  |
| BY794942.2 | 1056 | .....                                                                                                                                                   | .....                                                       | .....                                                           | 1206 |  |

```

      \
      |
      G
CF111220.1 1052 .....G..C..T..T.....TC...C.....C...A.....C...T..A..G...C. 1201
BX426149.2 670 .....T...C.....T...C...A.....T.....C..T.GT..A...A...GC.....T...A.....T.....G..... 521
CO001006.1 716 .....T...C.....T...C...A.....T.....C..T.GT..A...A...GC.....T...A.....T.....G..... 567
BX418564.2 680 .....T...C.....T...C...A.....T.....C..T.GT..A...A...GC.....T...A.....T.....G..... 531
BX426150.2 1026 .....T...C.....T...C...A.....T.....C..T.GT..A...A...GC.....T...A.....T.....G..... 1140
AL567209.3 640 .....T...C.....T...C...A.....T.....C..T.GT..A...A...GC.....T...A.....T.....G..... 492
BX440470.1 682 .....T...C.....T...C...A.....T.....C..T.GT..A...A...GC.....T...A.....T.....G..... 532

      \
      |
      C
BU902062.1 1038 .....C.G.....-.....T.....G.....-.....A.....C..G..T..... 1163

      \
      |
      C
Query 1202 ATCGCCGTTCTGGTAAAAGCTGGAAGATGGCCCTAAATTCTTGAAGTCTGGTGATGCTGCCATTGTTGATATGGTTCCTGGCAAGCCCATGTGTGTTGAGAGCTTCTCAGACTATCCACCTTTGGGTCGCTTTGCTGTTCTGATATGA 1351
DC527884.1 1209 .....T.....G.....C.....C.....C.....A.....T...C..T..AC.T...T.....C..... 1358
BY794942.2 1207 .....T.....G.....C.....C.....C.....A.....T...C..T..AC.T...T.....C..... 1356
CF111220.1 1202 .....T.....G.....C.....C.....C.....A.....T...C..T..AC.T...T.....C..... 1351
BX426149.2 520 .....T.....G.....C.....C.....C.....A.....T...C..T..AC.T...T.....C..... 371
CO001006.1 566 .....T.....G.....C.....C.....C.....A.....T...C..T..AC.T...T.....C..... 417
BX418564.2 530 .....T.....G.....C.....C.....C.....A.....T...C..T..AC.T...T.....C..... 381
AL567209.3 491 .....T.....G.....C.....C.....C.....A.....T...C..T..AC.T...T.....C..... 342
BX440470.1 531 .....T.....G.....C.....C.....C.....A.....T...C..T..AC.T...T.....C..... 382

      \
      |
      C
Query 1352 GACAGACAGTTGCGGTGGGTGTCAATCAAGCAGTGGACAGAAGGCTGCTGGAGCTGGCAAGGTACCAAGTCTGCCAGAAAGCTCAGAAGGCTAAATGAATATATCCCTAATACCTGCCACCCCACTCTTAATCAGTGGTGAAGAA 1501
DC527884.1 1359 .....T.....G.....C.....C.....C.....A.....T...C..T..AC.T...T.....C..... 1508
BY794942.2 1357 .....T.....G.....C.....C.....C.....A.....T...C..T..AC.T...T.....C..... 1506
CF111220.1 1352 .....T.....G.....C.....C.....C.....A.....T...C..T..AC.T...T.....C..... 1501
BX426149.2 370 .....T.....G.....C.....C.....C.....A.....T...C..T..AC.T...T.....C..... 221
CO001006.1 416 .....T.....G.....C.....C.....C.....A.....T...C..T..AC.T...T.....C..... 267
BX418564.2 380 .....T.....G.....C.....C.....C.....A.....T...C..T..AC.T...T.....C..... 231
AL567209.3 341 .....T.....G.....C.....C.....C.....A.....T...C..T..AC.T...T.....C..... 191

      \
      |
      A
BX440470.1 381 .....T.....G.....C.....C.....C.....A.....T...C..T..AC.T...T.....C..... 232

      \
      |
      A
Query 1502 CGGTCTCAGAAGCTGTTGTTTCAATTGGCCATTTAAGTTTAGTAGTAAAAGACTGGTTAATGATAACAATGCATCGTAAAACCTTCAGAAGGAAAGGAGAATgttttggaccactttgggttttttttttggtgtggcagttttaag 1651
DC527884.1 1509 .....T.....G.....C.....C.....C.....A.....T...C..T..AC.T...T.....C..... 1658
BY794942.2 1507 .....T.....G.....C.....C.....C.....A.....T...C..T..AC.T...T.....C..... 1656
CF111220.1 1502 .....T.....G.....C.....C.....C.....A.....T...C..T..AC.T...T.....C..... 1640
BX426149.2 220 .....T.....G.....C.....C.....C.....A.....T...C..T..AC.T...T.....C..... 71
CO001006.1 266 .....T.....G.....C.....C.....C.....A.....T...C..T..AC.T...T.....C..... 126

      \
      |
      T
BX418564.2 230 .....T.....G.....C.....C.....C.....A.....T...C..T..AC.T...T.....C..... 81
AL567209.3 190 .....T.....G.....C.....C.....C.....A.....T...C..T..AC.T...T.....C..... 40

      \
      |
      G
BX440470.1 231 .....T.....G.....C.....C.....C.....A.....T...C..T..AC.T...T.....C..... 82

      \
      |
      C
Query 1652 ttattagtttttaaaatcagtagtactttttaATGGAACAACCTTGACCAAAAAATTTGTACAGAAATTTTGGAGCCCATTAAGGTTAAATG 1742
DC527884.1 1659 .....T.....G.....C.....C.....C.....A.....T...C..T..AC.T...T.....C..... 1749
BY794942.2 1657 .....T.....G.....C.....C.....C.....A.....T...C..T..AC.T...T.....C..... 1747
CF111220.1 1641 .....T.....G.....C.....C.....C.....A.....T...C..T..AC.T...T.....C..... 1731

      \
      |
      C
BX426149.2 70 .....T.....G.....C.....C.....C.....A.....T...C..T..AC.T...T.....C..... 1
CO001006.1 125 .....T.....G.....C.....C.....C.....A.....T...C..T..AC.T...T.....C..... 35

      \
      |
      A
BX418564.2 80 .....T.....G.....C.....C.....C.....A.....T...C..T..AC.T...T.....C..... 1
AL567209.3 39 .....T.....G.....C.....C.....C.....A.....T...C..T..AC.T...T.....C..... 1
BX440470.1 81 .....T.....G.....C.....C.....C.....A.....T...C..T..AC.T...T.....C..... 1

```

Query= T3-23 [organism=Homo sapiens] eef1a1

Length=1643

| Sequences producing significant alignments:                       | Score<br>(Bits) | E<br>Value | Max<br>ident |
|-------------------------------------------------------------------|-----------------|------------|--------------|
| BY794942.2 BY794942 Homo sapiens eye Homo sapiens cDNA clone H... | 2468            | 0.0        | 100%         |



DC527884.1 DC527884 chimpanzee skin cDNA library PstA Pan trog... 2462 0.0 100%  
BX426149.2 BX426149 Homo sapiens NEUROBLASTOMA Homo sapiens cd... 2146 0.0 99%  
BX418564.2 BX418564 Homo sapiens FETAL BRAIN Homo sapiens cDNA... 2047 0.0 97%  
AL567209.3 AL567209 Homo sapiens FETAL BRAIN Homo sapiens cDNA... 2001 0.0 98%  
BX440470.1 BX440470 Homo sapiens FETAL BRAIN Homo sapiens cDNA... 1999 0.0 98%  
BX420340.1 BX420340 Homo sapiens FETAL BRAIN Homo sapiens cDNA... 1997 0.0 99%  
AL518238.2 AL518238 Homo sapiens NEUROBLASTOMA Homo sapiens cd... 1993 0.0 98%  
BX459625.2 BX459625 Homo sapiens FETAL BRAIN Homo sapiens cDNA... 1993 0.0 99%  
BX418589.2 BX418589 Homo sapiens FETAL BRAIN Homo sapiens cDNA... 1980 0.0 98%

ALIGNMENTS

Query 2 TTTTTCGCAACGGGTTTGCCGCCAGAACACAGGTGTCTGTGAAACTACCCCTAAAAGCCAAATGGGAAAGGAAAGACTCATATCAACATTGTCGTCAATTGGACACGTAGATTTCGGGCAAGTCCACCCTACTGGCCATCTGATCTATA 151  
BY794942.2 25 ..... 155  
DC527884.1 9 ..... 158

Query 152 AATGCGGTGGCATCGACAAAAGTAGCCTGGCTTGGATAAACTGAAAGCGACGCTGAACGTGGTATCACCATTGATATCTCCTTGTGGAAATTGAGACCAGCAGTACTATGTGACTATCATTGATGCCCCAGGACACAGAGACTTATCAA 301  
BY794942.2 156 ..... 177  
BY794942.2 230 ..... 366

.....  
| | | | |  
T G T T A T

DC527884.1 159 ..... 180  
DC527884.1 233 ..... 369

.....  
| | | | |  
T G T T A C

Query 302 ACATGATTGTTGCTGCTGGTGTGGTGAATTTGAAGCTGGTATCTCCAGAATGGGACGCCGAGAGCATGCCCTTCTGGCTTACACACTGGGTGTGAAACAACTAATTGTGCGGTGTTACAAAATGGATTCCACTGAGCCACCCCTACA 451  
BY794942.2 408 ..... 554  
BY794942.2 367 ..... 376

.....  
|  
AA

DC527884.1 411 ..... 557  
DC527884.1 370 ..... 379

.....  
|  
AA

BX426149.2 1196 ..... 1172  
BX418564.2 1196 ..... 1170  
AL567209.3 1145 ..... 1139

Query 452 GCCAGAAGAGATATGAGGAAATTTGTTAAGGAAGTCAGCACTTACATTAAGAAAAATTGGCTACAACCCGACACAGTAGCATTTGTGCCAATTTCTGGTTGGAATGGTGACAACATGCTGGAGCCAAGTGCTAACATGCCCTTGGTTCAAGG 601  
BY794942.2 555 ..... 704  
DC527884.1 558 ..... 707  
BX426149.2 1171 ..... 1022  
BX418564.2 1169 S...-R...-W...-G...W...-R...-M...-K...-R...-S...-R...-C... 1031  
AL567209.3 1138 S...-R...-W...-K...-R...-A...M...C...-C... 992

.....  
|  
M

BX440470.1 1128 ..... 1034

.....  
|  
C

BX420340.1 1117 ..... 1027  
AL518238.2 1148 ..... 1028  
BX459625.2 1118 ..... 1021

.....  
|  
T

BX418589.2 1130 ..... 1033

Query 602 GATGGAAAGTCACCCGTAAGGATGGCAATGCCAGTGAACCAACGCTGCTTGAGGCTCTGGAGTCGATCTACCACCACTCGTCCAACCTGACAAGCCCTTGGCCCTGCCTCTCAGGATGTCTACAAAATTGGTGGTATTGGTACTGTTC 751  
BY794942.2 705 ..... 854  
DC527884.1 708 ..... 857  
BX426149.2 1021 ..... 872  
BX418564.2 1030 ..... 882  
AL567209.3 991 ..... 842  
BX440470.1 1033 ..... 884  
BX420340.1 1026 ..... 877  
AL518238.2 1027 ..... 877

.....  
|  
A

BX459625.2 1020 ..... 871  
BX418589.2 1032 ..... 883

Query 752 CTGTGGCCGAGTGAGAGATGGTGTCTCAAAACCCGGTATGGTGGTCACTTTTGCTCCAGTCAACGTTACAACGGGAAGTAAATCTGTGCAATGCAACCATGAAGCTTTGAGTGAAGCTCTTCTGGGACAATGTGGGCTTCAATGTCA 901  
BY794942.2 855 ..... 1004  
DC527884.1 858 ..... 1007

| Accession  | Length | Sequence                                                                                                                                                | Accession | Length | Sequence |
|------------|--------|---------------------------------------------------------------------------------------------------------------------------------------------------------|-----------|--------|----------|
| BX426149.2 | 871    | .....                                                                                                                                                   | 722       |        |          |
| BX418564.2 | 881    | .....                                                                                                                                                   | 732       |        |          |
| AL567209.3 | 841    | .....                                                                                                                                                   | 692       |        |          |
| BX440470.1 | 883    | .....                                                                                                                                                   | 734       |        |          |
| BX420340.1 | 876    | .....                                                                                                                                                   | 727       |        |          |
| AL518238.2 | 876    | .....W.....B.....W.....                                                                                                                                 | 727       |        |          |
| BX459625.2 | 870    | .....                                                                                                                                                   | 721       |        |          |
| BX418589.2 | 882    | .....                                                                                                                                                   | 733       |        |          |
| Query      | 902    | AGAAATGTCCTGTCAGGATGTCGTCGTGGCAACGTTGCTGGTGACAGCAAAAATGACCCACCAATGGAAGCAGCTGGCTTCACTGCTCAGTGATTATCTCTGAACCATCCAGGCCAAATAGCGCCGGCTATGCCCTGTATTGGATT      | 1051      |        |          |
| BY794942.2 | 1005   | .....                                                                                                                                                   | 1155      |        |          |
|            |        | .....\                                                                                                                                                  |           |        |          |
|            |        | .....G                                                                                                                                                  |           |        |          |
| DC527884.1 | 1008   | .....                                                                                                                                                   | 1117      |        |          |
| BX426149.2 | 721    | .....                                                                                                                                                   | 572       |        |          |
| BX418564.2 | 731    | .....C.....                                                                                                                                             | 582       |        |          |
| AL567209.3 | 691    | .....-.....                                                                                                                                             | 543       |        |          |
| BX440470.1 | 733    | .....                                                                                                                                                   | 584       |        |          |
| BX420340.1 | 726    | .....                                                                                                                                                   | 577       |        |          |
| AL518238.2 | 726    | .....A.....G.....                                                                                                                                       | 577       |        |          |
| BX459625.2 | 720    | .....                                                                                                                                                   | 571       |        |          |
| BX418589.2 | 732    | .....                                                                                                                                                   | 583       |        |          |
| Query      | 1052   | GCCACACGGCTCACATTGCATGCAAGTTTGGCTGAGCTGAAGGAAAAGATTGATCGCCGCTTCTGGTAAAAAGCTGGAAGATGGCCCTAAATTCCTGAAGCTCTGGTGATGCTGCCATTGTTGATATGGTTCTGGCAAGCCCATGTGTGTG | 1201      |        |          |
| BY794942.2 | 1156   | .....                                                                                                                                                   | 1305      |        |          |
| DC527884.1 | 1158   | .....                                                                                                                                                   | 1307      |        |          |
| BX426149.2 | 573    | .....                                                                                                                                                   | 422       |        |          |
| BX418564.2 | 581    | .....M.....                                                                                                                                             | 432       |        |          |
| AL567209.3 | 542    | .....                                                                                                                                                   | 393       |        |          |
| BX440470.1 | 583    | .....K.....                                                                                                                                             | 433       |        |          |
|            |        | .....\                                                                                                                                                  |           |        |          |
|            |        | .....I                                                                                                                                                  |           |        |          |
|            |        | .....C                                                                                                                                                  |           |        |          |
| BX420340.1 | 576    | .....                                                                                                                                                   | 427       |        |          |
| AL518238.2 | 576    | .....Y.....                                                                                                                                             | 427       |        |          |
| BX459625.2 | 570    | .....                                                                                                                                                   | 421       |        |          |
| BX418589.2 | 582    | .....Y.S.....                                                                                                                                           | 433       |        |          |
| Query      | 1202   | AGAGCTTCTCAGACTATCCACCTTTGGGTCGCTTTGGCTGTCGTCGATATGAGACAGACAGTTCGCGTGGGTGTCATCAAAAGCAGTGGACAAGAGGCTGCTGGAGCTGGCAAGGTCACCAAGTCTGCCCAGAAGCTCAGAAGGCTAAAT  | 1351      |        |          |
| BY794942.2 | 1306   | .....                                                                                                                                                   | 1455      |        |          |
| DC527884.1 | 1308   | .....A.....                                                                                                                                             | 1457      |        |          |
| BX426149.2 | 421    | .....                                                                                                                                                   | 272       |        |          |
| BX418564.2 | 431    | .....                                                                                                                                                   | 282       |        |          |
| AL567209.3 | 392    | .....M.....Y.....                                                                                                                                       | 243       |        |          |
| BX440470.1 | 432    | .....                                                                                                                                                   | 283       |        |          |
| BX420340.1 | 426    | .....                                                                                                                                                   | 277       |        |          |
| AL518238.2 | 426    | .....G.....                                                                                                                                             | 277       |        |          |
| BX459625.2 | 420    | .....                                                                                                                                                   | 271       |        |          |
| BX418589.2 | 432    | .....                                                                                                                                                   | 283       |        |          |
| Query      | 1352   | GATATTATCCCTAATACCTGCCACCCCACTCTTAATCAGTGGTGGAAAGACGGCTCAGAACTGTTTGTTCATTTGCCATTTAAGTTTAGTATAAAGACTGGTTAATGATTAACATGCATCGTAAACCTTCAGAAGGAAAGGAG         | 1501      |        |          |
| BY794942.2 | 1456   | .....                                                                                                                                                   | 1605      |        |          |
| DC527884.1 | 1458   | .....C.....                                                                                                                                             | 1607      |        |          |
| BX426149.2 | 271    | .....                                                                                                                                                   | 122       |        |          |
| BX418564.2 | 281    | .....                                                                                                                                                   | 132       |        |          |
| AL567209.3 | 242    | .....                                                                                                                                                   | 92        |        |          |
|            |        | .....\                                                                                                                                                  |           |        |          |
|            |        | .....A                                                                                                                                                  |           |        |          |
| BX440470.1 | 282    | .....                                                                                                                                                   | 133       |        |          |
| BX420340.1 | 276    | .....                                                                                                                                                   | 127       |        |          |
| AL518238.2 | 276    | .....G.....                                                                                                                                             | 127       |        |          |
| BX459625.2 | 270    | .....                                                                                                                                                   | 121       |        |          |
| BX418589.2 | 282    | .....                                                                                                                                                   | 133       |        |          |
| Query      | 1502   | AAATGTTTTGTGGACCACTTGGTTTTTTTTTGGTGTGGCAGTTTTAAAGTATTAGTTTTTAAATCAGTACTTTTTAATGGAACAACCTTGACCAAAAATTTGTCACAGAATTTGAGACCCATTAAAAAGTTAAATG                | 1643      |        |          |
| BY794942.2 | 1606   | .....                                                                                                                                                   | 1747      |        |          |
| DC527884.1 | 1608   | .....                                                                                                                                                   | 1749      |        |          |
| BX426149.2 | 121    | .....-.....-.....G.....G.....T.....                                                                                                                     | 1         |        |          |
| BX418564.2 | 131    | .....M.....                                                                                                                                             | 1         |        |          |
| AL567209.3 | 91     | .....-.....-.....                                                                                                                                       | 1         |        |          |
|            |        | .....\                                                                                                                                                  |           |        |          |
|            |        | .....G                                                                                                                                                  |           |        |          |
| BX440470.1 | 132    | .....                                                                                                                                                   | 1         |        |          |
| BX420340.1 | 126    | .....R.....                                                                                                                                             | 1         |        |          |
| AL518238.2 | 126    | .....N.....N.....                                                                                                                                       | 1         |        |          |
|            |        | .....\                                                                                                                                                  |           |        |          |
|            |        | .....N                                                                                                                                                  |           |        |          |
| BX459625.2 | 120    | .....                                                                                                                                                   | 1         |        |          |

BX418589.2 132 .....D.....

1

Query= T4-32 [organism=Homo sapiens] eef1a1

Length=1203

| Sequences producing significant alignments:                       |                 |            |              |
|-------------------------------------------------------------------|-----------------|------------|--------------|
|                                                                   | Score<br>(Bits) | E<br>Value | Max<br>ident |
| BY794942.2 BY794942 Homo sapiens eye Homo sapiens cDNA clone H... | 1757            | 0.0        | 100%         |
| DC527884.1 DC527884 chimpanzee skin cDNA library PstA Pan trog... | 1749            | 0.0        | 100%         |
| AL541984.3 AL541984 Homo sapiens PLACENTA Homo sapiens cDNA cl... | 1749            | 0.0        | 100%         |
| BX440470.1 BX440470 Homo sapiens FETAL BRAIN Homo sapiens cDNA... | 1738            | 0.0        | 100%         |
| BX420402.2 BX420402 Homo sapiens FETAL BRAIN Homo sapiens cDNA... | 1736            | 0.0        | 100%         |
| BX440308.2 BX440308 Homo sapiens FETAL BRAIN Homo sapiens cDNA... | 1735            | 0.0        | 100%         |
| BX440436.2 BX440436 Homo sapiens FETAL BRAIN Homo sapiens cDNA... | 1735            | 0.0        | 100%         |
| BX325185.1 BX325185 Homo sapiens T CELLS (JURKAT CELL LINE) CO... | 1733            | 0.0        | 100%         |
| BX440303.2 BX440303 Homo sapiens FETAL BRAIN Homo sapiens cDNA... | 1731            | 0.0        | 100%         |
| BX418589.2 BX418589 Homo sapiens FETAL BRAIN Homo sapiens cDNA... | 1731            | 0.0        | 100%         |

#### ALIGNMENTS

|            |      |                                                                                                                                                            |      |
|------------|------|------------------------------------------------------------------------------------------------------------------------------------------------------------|------|
| Query      | 2    | TTTTTCGCAACGGGTTTCCGCCAGAACACAGGTGTCGTGAAAACTACCCCTAAAAAGCCAAAATGGGAAGGAAAAGACTCATATCAACATTGTCGTATTGGACACGTAGATTGGGCAAGTCCACCACTACTGGCCATCTGATCTATA        | 151  |
| BY794942.2 | 25   | .....                                                                                                                                                      | 155  |
| DC527884.1 | 9    | .....                                                                                                                                                      | 158  |
| Query      | 152  | AATGCGGTGGCATCGACAAAAGAACATTGAAAAATTTGAGAAGGAGGCTGCTGAGATGGGAAGGGCTCCTTCAAGTATGCCTGGGTCTTGGATAAACTGACAAGCCCTTGGCGCTGCCTCTCCAGGATGCTACAAAATTGGTGGTAT        | 301  |
| BY794942.2 | 790  | .....                                                                                                                                                      | 843  |
| BY794942.2 | 156  | .....                                                                                                                                                      | 261  |
| DC527884.1 | 793  | .....                                                                                                                                                      | 846  |
| DC527884.1 | 159  | .....                                                                                                                                                      | 264  |
| AL541984.3 | 59   | .....                                                                                                                                                      | 112  |
| BX440470.1 | 948  | .....                                                                                                                                                      | 895  |
| BX420402.2 | 944  | .....                                                                                                                                                      | 891  |
| BX440308.2 | 947  | .....                                                                                                                                                      | 894  |
| BX440436.2 | 950  | .....R.....                                                                                                                                                | 897  |
| BX325185.1 | 946  | .....R.....                                                                                                                                                | 893  |
| BX440303.2 | 946  | .....                                                                                                                                                      | 893  |
| BX418589.2 | 947  | .....                                                                                                                                                      | 894  |
| Query      | 302  | TGGTACTGTTCTCTTGGCCGAGTGGAGACTGGTGTCTCAAACCCGGTATGGTGGTCACCTTTTGCTCCAGTCAACGTTACAACGGAAGTAAAACTGTGCGAAATGCACCATTGAAGCTTTGAGTGAAGCTCTTCTTGGGGACAATGTGGG     | 451  |
| BY794942.2 | 844  | .....                                                                                                                                                      | 993  |
| DC527884.1 | 847  | .....                                                                                                                                                      | 996  |
| AL541984.3 | 113  | .....                                                                                                                                                      | 262  |
| BX440470.1 | 894  | .....                                                                                                                                                      | 745  |
| BX420402.2 | 890  | .....                                                                                                                                                      | 741  |
| BX440308.2 | 893  | .....                                                                                                                                                      | 744  |
| BX440436.2 | 896  | .....                                                                                                                                                      | 747  |
| BX325185.1 | 892  | .....                                                                                                                                                      | 743  |
| BX440303.2 | 892  | .....                                                                                                                                                      | 743  |
| BX418589.2 | 893  | .....                                                                                                                                                      | 744  |
| Query      | 452  | CTTCAATGTCAAGAATGTGTCTGTCAAGGATGTTCTGCTGGCAACGTTGCTGGTGACAGCAAAAATGACCCACCAATGGAAGCAGCTGGCTTCACTGCTCAGGTGATTATCTCTGAACCATCCAGGCCAAAATAAGCGCCGGCTATGCCCC    | 601  |
| BY794942.2 | 994  | .....                                                                                                                                                      | 1144 |
|            |      | \                                                                                                                                                          |      |
|            |      | I                                                                                                                                                          |      |
|            |      | G                                                                                                                                                          |      |
| DC527884.1 | 997  | .....                                                                                                                                                      | 1146 |
| AL541984.3 | 263  | .....                                                                                                                                                      | 412  |
| BX440470.1 | 744  | .....                                                                                                                                                      | 595  |
| BX420402.2 | 740  | .....                                                                                                                                                      | 591  |
| BX440308.2 | 743  | .....M.....                                                                                                                                                | 594  |
| BX440436.2 | 746  | .....                                                                                                                                                      | 597  |
| BX325185.1 | 742  | .....                                                                                                                                                      | 593  |
| BX440303.2 | 742  | .....C.....                                                                                                                                                | 593  |
| BX418589.2 | 743  | .....                                                                                                                                                      | 594  |
| Query      | 602  | TGATTATTGATTGCCACACGGCTCACATTGCATGCAAGTTTGTCTGAGCTGAAGGAAAAGATTGATCGCCGTTCTGGTAAAAAGCTGGAAGATGGCCCTAAATTCCTTGAAGTCTGGTGATGCTGCCATTGTTGATATGGTTCTCTGGCAAGCC | 751  |
| BY794942.2 | 1145 | .....                                                                                                                                                      | 1294 |
| DC527884.1 | 1147 | .....                                                                                                                                                      | 1296 |
| AL541984.3 | 413  | .....                                                                                                                                                      | 562  |
| BX440470.1 | 594  | .....                                                                                                                                                      | 444  |
|            |      | \                                                                                                                                                          |      |
|            |      | I                                                                                                                                                          |      |
|            |      | C                                                                                                                                                          |      |
| BX420402.2 | 590  | .....                                                                                                                                                      | 441  |
| BX440308.2 | 593  | .....                                                                                                                                                      | 444  |
| BX440436.2 | 596  | .....                                                                                                                                                      | 447  |
| BX325185.1 | 592  | .....Y.....                                                                                                                                                | 443  |
| BX440303.2 | 592  | .....                                                                                                                                                      | 443  |
| BX418589.2 | 593  | .....Y.S.....                                                                                                                                              | 444  |

Query 752 CATGTGTGTTGAGAGCTTCTCAGACTATCCACCTTTGGGTCGCTTTGCTGTTCTGTGATATGAGACAGACAGTTGCGGTGGGTGTCATCAAGCAGTGGCAAGAAGGCTGCTGGAGCTGGCAAGGTCACCAAGTCTGCCAGAAAGCTCA 901  
BY794942.2 1295 ..... 1444  
DC527884.1 1297 ..... A ..... 1446  
AL541984.3 563 ..... 712  
BX440470.1 443 ..... 294  
BX420402.2 440 ..... 291  
BX440308.2 443 ..... 294  
BX440436.2 446 ..... 297  
BX325185.1 442 ..... 293  
BX440303.2 442 ..... 293  
BX418589.2 443 ..... 294

Query 902 GAAGGCTAAATGAATATTTATCCCTAATACTGCCACCCCACTCTTAATCAGTGGTGAAGAACGGTCTCAGAACTGTTTGTTCATTTGCCATTTAAGTTTAGTAGTAAAGACTGGTTAATGATAACAATGCATCGTAAAACTTCAG 1051  
BY794942.2 1445 ..... 1594  
DC527884.1 1447 ..... C ..... 1596  
AL541984.3 713 ..... 862  
BX440470.1 293 ..... 144  
BX420402.2 290 ..... 141  
BX440308.2 293 ..... 144  
BX440436.2 296 ..... 147  
BX325185.1 292 ..... 143  
BX440303.2 292 ..... 143  
BX418589.2 293 ..... 144

Query 1052 AAGGAAAGGAGAATGTTTGTGGACCACtttggtttttcttttgcgtgtggcagttttaagttattagtttttaaaatcagtactttttaATGGAAACAACCTTGACCAAAAATTTGTCACAGAAATTTTGAGACCCATTAAAAAAGTTAAA 1201  
BY794942.2 1595 ..... 1745

DC527884.1 1597 ..... 1747  
AL541984.3 863 ..... K.S ..... 1014  
BX440470.1 143 ..... 1  
BX420402.2 140 ..... 1  
BX440308.2 143 ..... 1  
BX440436.2 146 ..... N ..... 1  
BX325185.1 142 ..... N ..... 1  
BX440303.2 142 ..... 1  
BX418589.2 143 ..... D ..... 1

Query 1202 TG 1203  
BY794942.2 1746 .. 1747  
DC527884.1 1748 .. 1749  
AL541984.3 1015 .. 1016

Query= T5-24 [organism=Homo sapiens] eef1a1

Length=822

| Sequences producing significant alignments: |                                                        | Score<br>(Bits) | E<br>Value | Max<br>ident |
|---------------------------------------------|--------------------------------------------------------|-----------------|------------|--------------|
| CR979370.1                                  | CR979370 RZPD no.9017 Homo sapiens cDNA clone RZPDp... | 905             | 0.0        | 100%         |
| CD522692.1                                  | AGENCOURT_14354560 NIH_MGC_191 Homo sapiens cDNA cl... | 905             | 0.0        | 100%         |

BU581210.1 in37g01.x1 Human Fetal Pancreas 1B Homo sapiens cDN... 905 0.0 100%  
BU532443.1 AGENCOURT\_10200888 NIH\_MGC\_126 Homo sapiens cDNA cl... 905 0.0 100%  
BU158477.1 AGENCOURT\_7937274 NIH\_MGC\_92 Homo sapiens cDNA clon... 905 0.0 100%  
BM993568.1 UI-H-DT0-avj-h-01-0-UI.s1 NCI\_CGAP\_DT0 Homo sapiens... 905 0.0 100%  
AU147847.1 AU147847 MAMMA1 Homo sapiens cDNA clone MAMMA100186... 905 0.0 100%  
BE677612.1 7d88f01.x1 Lupski\_dorsal\_root\_ganglion Homo sapiens... 905 0.0 100%  
CN389382.1 17000600087635 GRN\_PRENEU Homo sapiens cDNA 5', mRN... 904 0.0 100%  
CX868104.1 HESC4\_26\_d10.b1\_A037 NIH\_MGC\_262 Homo sapiens cDNA ... 902 0.0 100%

ALIGNMENTS

Query 333 TGATGCTGCCATTGTGTATATGGTTCTCGCAAGCCCATGTGTGTTGAGAGCTTCTCAGACTATCCACCTTTGGGTGCGTTTGTCTGTTGATATGAGACAGACAGTTGCGGTGGGTGTCAATCAAGCAGTGGACAAGAAGGCTGCTGG 482  
CR979370.1 235 ..... 384  
CD522692.1 74 ..... 223  
BU581210.1 492 ..... 343  
BU532443.1 85 ..... 234  
BU158477.1 256 ..... 405  
BM993568.1 508 ..... 359  
AU147847.1 492 ..... 343  
BE677612.1 501 ..... 352  
CN389382.1 145 ..... 294  
CX868104.1 515 ..... 366

Query 483 AGCTGGCAAGGTCACCAAGTCTGCCAGAAAGCTCAGAAGGCTAAATGAATATTATCCCTAATACCTGCCACCCCACTCTTAATCAGTGGTGAAGAACGGTCTCAGAACTGTTGTTGTTCAATTGGCCATTTAAGTTTAGTAGTAAAAGA 632  
CR979370.1 385 ..... 534  
CD522692.1 224 ..... 373  
BU581210.1 342 ..... 193  
BU532443.1 235 ..... 384  
BU158477.1 406 ..... 555  
BM993568.1 358 ..... 209  
AU147847.1 342 ..... 193  
BE677612.1 351 ..... 202  
CN389382.1 295 ..... 444  
CX868104.1 365 ..... 216

Query 633 CTGGTTAATGATAACAATGCATCTGTAACCTTCAGAAGGAAAGGAGAATgtttttgtggaccactttgggtttcttttttgcgtgtggcagttttaagttattagtttttaaaatcagttactttttaATGGAAACAACCTTGACCAAAAAT 782  
CR979370.1 535 ..... 684  
CD522692.1 374 ..... 523  
BU581210.1 192 ..... 43  
BU532443.1 385 ..... 534  
BU158477.1 556 ..... 705  
BM993568.1 208 ..... 59  
AU147847.1 192 ..... 43  
BE677612.1 201 ..... 52  
CN389382.1 445 ..... 594  
CX868104.1 215 ..... 66

Query 783 TTGTACAGAAATTTGAGACCCATTaaaaaaaGTTAAATG 822  
CR979370.1 685 ..... 724  
CD522692.1 524 ..... 563  
BU581210.1 42 ..... 3  
BU532443.1 535 ..... 574  
BU158477.1 706 ..... 745  
BM993568.1 58 ..... 19  
AU147847.1 42 ..... 3  
BE677612.1 51 ..... 12  
CN389382.1 595 ..... 633  
CX868104.1 65 .....N.. 26

Query= T6-31 [organism=Homo sapiens] eef1a1

Length=1168

| Sequences producing significant alignments:                       | Score<br>(Bits) | E<br>Value | Max<br>ident |
|-------------------------------------------------------------------|-----------------|------------|--------------|
| BY794942.2 BY794942 Homo sapiens eye Homo sapiens cDNA clone H... | 1855            | 0.0        | 99%          |
| DC527884.1 DC527884 chimpanzee skin cDNA library PstA Pan trog... | 1847            | 0.0        | 99%          |
| BX440470.1 BX440470 Homo sapiens FETAL BRAIN Homo sapiens cDNA... | 1832            | 0.0        | 99%          |
| AL541984.3 AL541984 Homo sapiens PLACENTA Homo sapiens cDNA cl... | 1831            | 0.0        | 99%          |
| BX418589.2 BX418589 Homo sapiens FETAL BRAIN Homo sapiens cDNA... | 1829            | 0.0        | 99%          |
| BX442182.2 BX442182 Homo sapiens FETAL BRAIN Homo sapiens cDNA... | 1823            | 0.0        | 99%          |
| BX459625.2 BX459625 Homo sapiens FETAL BRAIN Homo sapiens cDNA... | 1818            | 0.0        | 100%         |
| BX420340.1 BX420340 Homo sapiens FETAL BRAIN Homo sapiens cDNA... | 1816            | 0.0        | 99%          |
| BX418564.2 BX418564 Homo sapiens FETAL BRAIN Homo sapiens cDNA... | 1814            | 0.0        | 99%          |
| BX325185.1 BX325185 Homo sapiens T CELLS (JURKAT CELL LINE) CO... | 1810            | 0.0        | 99%          |

ALIGNMENTS

Query 1 TGGTGTGTTGTAATTTGAAGCTGGTATCTCCAAGAAATGGGCAGACCCGAGAGCATGCCCTTCTGGCTTACACACTGGGTGTGAAACAACATAATTGTCGGTGTAAACAAATGGATTCCACTGAGCCACCTACAGCCAGAGAGATATGA 150  
BY794942.2 723 ..... 723

|            |      |                                                                                                                                                       |      |
|------------|------|-------------------------------------------------------------------------------------------------------------------------------------------------------|------|
| BY794942.2 | 421  | .....                                                                                                                                                 | 570  |
| DC527884.1 | 726  | .....                                                                                                                                                 | 726  |
| DC527884.1 | 424  | .....                                                                                                                                                 | 573  |
| BX440470.1 | 1015 | .....                                                                                                                                                 | 1015 |
| BX418589.2 | 1014 | .....                                                                                                                                                 | 1014 |
| BX442182.2 | 1007 | .....                                                                                                                                                 | 1007 |
| BX459625.2 | 1002 | .....                                                                                                                                                 | 1002 |
| BX420340.1 | 1008 | .....                                                                                                                                                 | 1008 |
| BX418564.2 | 1013 | .....                                                                                                                                                 | 1013 |
| BX325185.1 | 1013 | .....                                                                                                                                                 | 1013 |
| Query      | 151  | GGATGGCAATGCCAGTGGGAACACGCTGCTTGAGGCTCTGGACTGCATCCTACACCAACTCGTCCAACCTGACAAGCCCTTGCGCCTGCCTCTCCAGGATGCTACAAAAATTGGTGATTGGTACTGTTCTGTTGGCCGAGTGGAGACT  | 300  |
| BY794942.2 | 724  | .....                                                                                                                                                 | 874  |
|            |      |                                                                                                                                                       |      |
|            |      | C                                                                                                                                                     |      |
| BY794942.2 | 571  | ...                                                                                                                                                   | 573  |
| DC527884.1 | 727  | .....                                                                                                                                                 | 877  |
|            |      |                                                                                                                                                       |      |
|            |      | C                                                                                                                                                     |      |
| DC527884.1 | 574  | ...                                                                                                                                                   | 576  |
| BX440470.1 | 1014 | .....R.....                                                                                                                                           | 864  |
|            |      |                                                                                                                                                       |      |
|            |      | C                                                                                                                                                     |      |
| AL541984.3 | 1    | .....                                                                                                                                                 | 143  |
|            |      |                                                                                                                                                       |      |
|            |      | C                                                                                                                                                     |      |
| BX418589.2 | 1013 | .....                                                                                                                                                 | 863  |
|            |      |                                                                                                                                                       |      |
|            |      | C                                                                                                                                                     |      |
| BX442182.2 | 1006 | .....R...                                                                                                                                             | 856  |
|            |      |                                                                                                                                                       |      |
|            |      | C                                                                                                                                                     |      |
| BX459625.2 | 1001 | .....                                                                                                                                                 | 851  |
|            |      |                                                                                                                                                       |      |
|            |      | C                                                                                                                                                     |      |
| BX420340.1 | 1007 | .....A.....R.....                                                                                                                                     | 857  |
|            |      |                                                                                                                                                       |      |
|            |      | C                                                                                                                                                     |      |
| BX418564.2 | 1012 | .....C.....                                                                                                                                           | 862  |
|            |      |                                                                                                                                                       |      |
|            |      | C                                                                                                                                                     |      |
| BX325185.1 | 1012 | .....K.R.M.....K.....A.....R.....                                                                                                                     | 862  |
|            |      |                                                                                                                                                       |      |
|            |      | C                                                                                                                                                     |      |
| Query      | 301  | GGTGTCTCTCAAACCGGTATGGTGGTCACCTTTGCTCCAGTCAACGTTACAACGAAGTAAATCTGTGCAAAATGCACCATGAAGCTTTGAGTGAAGCTCTTCTGGGGACAATGTGGGCTTCAATGTCAAGATGTGTCTGTCAAGGATGT | 450  |
| BY794942.2 | 875  | .....                                                                                                                                                 | 1026 |
|            |      |                                                                                                                                                       |      |
|            |      | C                                                                                                                                                     |      |
| DC527884.1 | 878  | .....                                                                                                                                                 | 1029 |
|            |      |                                                                                                                                                       |      |
|            |      | G                                                                                                                                                     |      |
| BX440470.1 | 863  | .....                                                                                                                                                 | 712  |
|            |      |                                                                                                                                                       |      |
|            |      | G                                                                                                                                                     |      |
| AL541984.3 | 144  | .....                                                                                                                                                 | 295  |
|            |      |                                                                                                                                                       |      |
|            |      | G                                                                                                                                                     |      |
| BX418589.2 | 862  | .....                                                                                                                                                 | 711  |
|            |      |                                                                                                                                                       |      |
|            |      | G                                                                                                                                                     |      |
| BX442182.2 | 855  | .....                                                                                                                                                 | 704  |
|            |      |                                                                                                                                                       |      |
|            |      | G                                                                                                                                                     |      |
| BX459625.2 | 850  | .....                                                                                                                                                 | 699  |
|            |      |                                                                                                                                                       |      |
|            |      | G                                                                                                                                                     |      |

|            |      |                                                                                                                                                         |        |       |        |             |      |
|------------|------|---------------------------------------------------------------------------------------------------------------------------------------------------------|--------|-------|--------|-------------|------|
| BX420340.1 | 856  | .....                                                                                                                                                   | I<br>C | ..... | I<br>G | .....       | 705  |
| BX418564.2 | 861  | .....                                                                                                                                                   | I<br>C | ..... | I<br>G | .....C..... | 710  |
| BX325185.1 | 861  | .....                                                                                                                                                   | I<br>C | ..... | I<br>G | .....       | 710  |
| Query      | 451  | TCGTCGTGGCAACGTTGCTGGTGACAGCAAAAAATGACCACCAATGGAAGCAGCTGGCTTCACTGCTCAGGTGATTATCCTGAACCATCCAGGCCAAATAAGCGCCGGCTATGCCCTGTATTGGATTGCCACACGGCTCACATTGCATGCA |        |       |        | 600         |      |
| BY794942.2 | 1027 | .....                                                                                                                                                   | I<br>C | ..... | I<br>G | .....       | 1179 |
| DC527884.1 | 1030 | .....                                                                                                                                                   | I<br>C | ..... | I<br>G | .....       | 1181 |
| BX440470.1 | 711  | .....                                                                                                                                                   | I<br>C | ..... | I<br>C | .....       | 560  |
| AL541984.3 | 296  | .....                                                                                                                                                   | I<br>C | ..... | I<br>C | .....       | 447  |
| BX418589.2 | 710  | .....                                                                                                                                                   | I<br>C | ..... | I<br>C | .....       | 559  |
| BX442182.2 | 703  | .....                                                                                                                                                   | I<br>C | ..... | I<br>C | .....       | 552  |
| BX459625.2 | 698  | .....                                                                                                                                                   | I<br>C | ..... | I<br>C | .....       | 547  |
| BX420340.1 | 704  | .....                                                                                                                                                   | I<br>C | ..... | I<br>C | .....       | 553  |
| BX418564.2 | 709  | .....                                                                                                                                                   | I<br>C | ..... | I<br>C | .....       | 558  |
| BX325185.1 | 709  | .....                                                                                                                                                   | I<br>C | ..... | I<br>C | .....Y..... | 558  |
| Query      | 601  | AGTTTGCTGAGCTGAAGGAAAAAGATTGATCGCGTTCTGGTAAAAAGCTGGAAGATGGCCCTAAATTCCTGAAGTCTGGTGATGCTGCCATTGTTGATATGGTTCTTGGCAAGCCCATGTGTGTTGAGAGCTTCTCAGACTATCCACCTT  |        |       |        | 750         |      |
| BY794942.2 | 1180 | .....                                                                                                                                                   | I<br>C | ..... | I<br>C | .....       | 1329 |
| DC527884.1 | 1182 | .....                                                                                                                                                   | I<br>C | ..... | I<br>C | .....       | 1331 |
| BX440470.1 | 559  | .....                                                                                                                                                   | I<br>C | ..... | I<br>C | .....       | 409  |
| AL541984.3 | 448  | .....                                                                                                                                                   | I<br>C | ..... | I<br>C | .....       | 597  |
| BX418589.2 | 558  | .....Y.S.....                                                                                                                                           | I<br>C | ..... | I<br>C | .....       | 409  |
| BX442182.2 | 551  | .....                                                                                                                                                   | I<br>C | ..... | I<br>C | .....       | 402  |
| BX459625.2 | 546  | .....                                                                                                                                                   | I<br>C | ..... | I<br>C | .....       | 397  |
| BX420340.1 | 552  | .....                                                                                                                                                   | I<br>C | ..... | I<br>C | .....       | 403  |
| BX418564.2 | 557  | .....M.....                                                                                                                                             | I<br>C | ..... | I<br>C | .....       | 408  |
| BX325185.1 | 557  | .....                                                                                                                                                   | I<br>C | ..... | I<br>C | .....       | 408  |
| Query      | 751  | TGGGTCGCTTTGCTGTTCTGATATGAGACAGACAGTTTGGGTGGGTGTCATCAAAGCAGTGGAAGAAGCTGCTGGAGCTGGCAAGGTCACCAAGTCTGCCAGAAAGCTCAGAAGGCTAAATGAATATTATCCCTAATACCTGCCA       |        |       |        | 900         |      |
| BY794942.2 | 1330 | .....                                                                                                                                                   | I<br>C | ..... | I<br>C | .....       | 1479 |
| DC527884.1 | 1332 | .....A.....                                                                                                                                             | I<br>C | ..... | I<br>C | .....       | 1481 |
| BX440470.1 | 408  | .....                                                                                                                                                   | I<br>C | ..... | I<br>C | .....       | 259  |
| AL541984.3 | 598  | .....                                                                                                                                                   | I<br>C | ..... | I<br>C | .....       | 747  |
| BX418589.2 | 408  | .....                                                                                                                                                   | I<br>C | ..... | I<br>C | .....       | 259  |
| BX442182.2 | 401  | .....                                                                                                                                                   | I<br>C | ..... | I<br>C | .....       | 252  |
| BX459625.2 | 396  | .....                                                                                                                                                   | I<br>C | ..... | I<br>C | .....       | 247  |
| BX420340.1 | 402  | .....                                                                                                                                                   | I<br>C | ..... | I<br>C | .....       | 253  |
| BX418564.2 | 407  | .....                                                                                                                                                   | I<br>C | ..... | I<br>C | .....       | 258  |

BX325185.1 407 ..... 258

Query 901 CCCCACTCTTAATCAGTGGTGAAGAAGCGTCTCAGAACTGTTTGTTCATTTGGCCATTTAAGTTTAGTAGTAAAAAGACTGGTAAATGATAACAATGCATCGTAAACCTTCAGAAGGAAGGAGAAATgttttggaccactttggtt 1050

BY794942.2 1480 ..... 1629

DC527884.1 1482 .....C..... 1631

BX440470.1 258 ..... 109

AL541984.3 748 ..... 897

BX418589.2 258 ..... 109

BX442182.2 251 ..... 102

BX459625.2 246 ..... 97

BX420340.1 252 ..... 103

BX418564.2 257 ..... 108

BX325185.1 257 ..... 108

Query 1051 ttcttttttgcgtgtggcagttttaagttattagtttttaaaatcagtagctttttaatGGAACAACACTTGACCAAAAATTTGTCAAGAAATTTTGAGACCCATTAAAAAGTTAAATG 1168

BY794942.2 1630 ..... 1747

DC527884.1 1632 ..... 1749

BX440470.1 108 ..... 1

AL541984.3 898 .....K.S..... 1016

.....M.....D..... 1

..... 1

.....R..... 1

.....M..... 1

BX325185.1 107 ..... 1

Query= T7-25 [organism=Homo sapiens] eef1a1

Length=1553

| Sequences producing significant alignments:                       |                 |            |              |
|-------------------------------------------------------------------|-----------------|------------|--------------|
|                                                                   | Score<br>(Bits) | E<br>Value | Max<br>ident |
| BY794942.2 BY794942 Homo sapiens eye Homo sapiens cDNA clone H... | 2710            | 0.0        | 100%         |
| DC527884.1 DC527884 chimpanzee skin cDNA library PstA Pan trog... | 2693            | 0.0        | 100%         |
| BX426149.2 BX426149 Homo sapiens NEUROBLASTOMA Homo sapiens cD... | 2146            | 0.0        | 99%          |
| CO001006.1 OC028 pre-oestrus adult sheep ovary library Ovis ar... | 2050            | 0.0        | 93%          |
| BX418564.2 BX418564 Homo sapiens FETAL BRAIN Homo sapiens cDNA... | 2047            | 0.0        | 97%          |
| CF111220.1 Shultzomica04471 Rat lung airway and parenchyma cDN... | 2034            | 0.0        | 92%          |
| AL567209.3 AL567209 Homo sapiens FETAL BRAIN Homo sapiens cDNA... | 2001            | 0.0        | 98%          |
| BX440470.1 BX440470 Homo sapiens FETAL BRAIN Homo sapiens cDNA... | 1999            | 0.0        | 98%          |
| BX420340.1 BX420340 Homo sapiens FETAL BRAIN Homo sapiens cDNA... | 1997            | 0.0        | 99%          |
| AL518238.2 AL518238 Homo sapiens NEUROBLASTOMA Homo sapiens cD... | 1993            | 0.0        | 98%          |

# ALIGNMENTS

Query 2 TTTTTCGCAACGGGTTTGCCGCCAGAACACAGGTGTCTGTGAAAACATACCCCTAAAGCCAAATGGGAAGGAAAAGACTCATATCACCATTGATATCTCCTTTGTGGAAATTTGAGACCAGCAAGTACTATGTGACTATCATTGATGCC 151

BY794942.2 277 ..... 344

BY794942.2 25 .....A..... 98

DC527884.1 280 .....T..... 347

DC527884.1 9 .....A..... 101

CO001006.1 1464 .....T.C..... 1428

CF111220.1 273 .....T....C....C.....G..... 340

Query 152 CAGGACACAGAGACTTTATCAAAAACATGATTACAGGGACATCTCAGCGTGACTGTGCTGCTCTGTTGTTGCTGCTGTTGGTGAATTTGAAGCTGGTATCTCCAAGAATGGGCAGACCCGAGAGCATGCCCTTCTGGCTTACACAC 301

BY794942.2 345 ..... 494

DC527884.1 348 .....C..... 497

CO001006.1 1427 .....C....C....C.....C.....T..... 1278

CF111220.1 341 .....C....G....G..C.....C.....G.....C.....T.....T.....TT 490

Query 302 TGGGTGTGAAACAACATAATTGTCGGTGTTAACAAATGGATTCCACTGAGCCACCCCTACAGCCAGAGAGATATGAGGAAATTTGTTAAGGAAGTCAGCACTTACATTAGAAAATTTGGCTACACCCCGACACAGTAGCATTGTGCGCAA 451

BY794942.2 495 ..... 644

DC527884.1 498 ..... 647

BX426149.2 1196 .....A.....A.....G..... 1082

CO001006.1 1277 .....T.....C.....T.....C.....C..... 1128

BX418564.2 1196 .....YH.VS...-R.....W.-G..W...-R.....M.....K.....R.....S.....-R..... 1089

CF111220.1 491 .....G.....T.....C.....C.....A.....T.....C.....C.....T..... 640

AL567209.3 1145 .....S.....W.....-K.W.....R.....A.M.C.....C..... 1052

.....M.....

.....W.....S.M. 1091

.....C.....

.....M.....K.-.M. 1086

.....R.....M.....W..M..V.M..... 1087



|            |      |                                                                                                                                                          |      |
|------------|------|----------------------------------------------------------------------------------------------------------------------------------------------------------|------|
| Query      | 452  | TTTCTGGTTGGAATGGTGACAACTGCTGGAGCCAAAGTGCTAACATGCCTTGGTTCAAGGGATGGAAAGTCACCCGTAAGGATGGCAATGCCAGTGGAAACCACGCTGCTTGAGGCTCTGGACTGCATCCTACCACCAACTCGTCCAACGT  | 601  |
| BY794942.2 | 645  | .....                                                                                                                                                    | 784  |
| DC527884.1 | 648  | .....                                                                                                                                                    | 797  |
| BX426149.2 | 1081 | .....                                                                                                                                                    | 932  |
| CO001006.1 | 1127 | .....C.....T.....A.....C.....A.....T.....G.....C.....                                                                                                    | 978  |
| BX418564.2 | 1088 | .....C.....T.....A.....C.....A.....T.....G.....C.....                                                                                                    | 942  |
| CF111220.1 | 641  | .....T.....G.....C.....A.....G.....C.....G.....A.....T.....T.....G.....G.....                                                                            | 790  |
| AL567209.3 | 1051 | .....K.....                                                                                                                                              | 902  |
| BX440470.1 | 1090 | .....Y.....K.....                                                                                                                                        | 944  |
| BX420340.1 | 1085 | W.....Y.....T.....D.....K.....T.....Y.....                                                                                                               | 937  |
| AL518238.2 | 1086 | .....K.....A.....A.....W.....R.....A.....                                                                                                                | 937  |
|            |      | .....\.....<br>..... .....<br>.....A.....                                                                                                                |      |
| Query      | 602  | ACAAGCCCTTGGCGCTGCCTCTCCAGGATGCTACAAAAATTGGTGGTATTGGTACTGTTCTCTGTTGGCCGAGTGGAGACTGGTGTCTCAAAACCCGGTATGGTGGTCACTTTTGCTCCAGTCAACGTTACACGGGAAGTAAAACTCTGTGC | 751  |
| BY794942.2 | 795  | .....                                                                                                                                                    | 944  |
| DC527884.1 | 798  | .....                                                                                                                                                    | 947  |
| BX426149.2 | 931  | .....                                                                                                                                                    | 782  |
| CO001006.1 | 977  | .....A.....TT.....T.....A.....G.....T.....T.....T.....C.....C.....T.....A.....T.....G.....G.....C.....A.....                                             | 828  |
| BX418564.2 | 941  | .....C.....                                                                                                                                              | 792  |
| CF111220.1 | 791  | .....TC.....A.....C.....T.....C.....C.....C.....C.....G.....A.....T.....T.....T.....A.....T.....C.....G.....G.....                                       | 940  |
| AL567209.3 | 901  | .....                                                                                                                                                    | 752  |
| BX440470.1 | 943  | .....                                                                                                                                                    | 794  |
| BX420340.1 | 936  | .....W.....B.....W.....                                                                                                                                  | 787  |
| AL518238.2 | 936  | .....                                                                                                                                                    | 787  |
| Query      | 752  | AAATGCACCATGAAGCTTTGAGTGAAGCTTCTCCTGGGGACAATGGGGCTTCAATGTCAAGAAATGTGCTGTCAAGGATGTTCTGCTGGCAACGTTGCTGGTGACAGCAAAAATGACCCACCAATGGAAGCAGCTGGCTTCACTGC       | 901  |
| BY794942.2 | 945  | .....                                                                                                                                                    | 1094 |
| DC527884.1 | 948  | .....                                                                                                                                                    | 1097 |
| BX426149.2 | 781  | .....                                                                                                                                                    | 632  |
| CO001006.1 | 827  | .....C.....C.....A.....C.....T.....G.....T.....C.....T.....C.....A.....                                                                                  | 678  |
| BX418564.2 | 791  | .....                                                                                                                                                    | 642  |
| CF111220.1 | 941  | .....G.....A.....C.....A.....C.....A.....C.....A.....A.....T.....G.....                                                                                  | 1090 |
| AL567209.3 | 751  | .....                                                                                                                                                    | 603  |
| BX440470.1 | 793  | .....                                                                                                                                                    | 644  |
| BX420340.1 | 786  | .....                                                                                                                                                    | 637  |
| AL518238.2 | 786  | .....A.....G.....                                                                                                                                        | 637  |
| Query      | 902  | AGGTGATTATCTCGAACCATCCAGGCCAAATAGCGCCGGCTATGCCCTGTATTGGATTGCCACACGGCTCACATGCGATGCAAGTTTGTCTGAGCTGAAGGAAAGATTGATCGCCGTTCTGGTAAAAGCTGGAAGATGGCCCTAAAT      | 1051 |
| BY794942.2 | 1095 | .....                                                                                                                                                    | 1245 |
|            |      | .....\.....<br>..... .....<br>.....G.....                                                                                                                |      |
| DC527884.1 | 1098 | .....                                                                                                                                                    | 1247 |
| BX426149.2 | 631  | .....T.....C.....T.....GT.....A.....A.....GC.....T.....A.....T.....G.....T.....G.....                                                                    | 482  |
| CO001006.1 | 677  | .....                                                                                                                                                    | 528  |
| BX418564.2 | 641  | .....                                                                                                                                                    | 492  |
| CF111220.1 | 1091 | .....G.....C.....T.....T.....TC.....C.....C.....A.....C.....T.....A.....G.....C.....T.....G.....C.....                                                   | 1240 |
| AL567209.3 | 602  | .....                                                                                                                                                    | 453  |
| BX440470.1 | 643  | .....                                                                                                                                                    | 493  |
|            |      | .....\.....<br>..... .....<br>.....C.....                                                                                                                |      |
| BX420340.1 | 636  | .....Y.....                                                                                                                                              | 487  |
| AL518238.2 | 636  | .....                                                                                                                                                    | 487  |
| Query      | 1052 | TCTTGAAGCTCTGGTGATGCTGCCATTGTGATATGGTTCTGGCAAGCCCATGTGTGTGAGAGCTTCTCAGACTATCCACCTTTGGTGCCTTTGTCTGTTCTGATATGAGACAGACAGTTGCGGTGGGTGTCATCAAGCAGTGGACA       | 1201 |
| BY794942.2 | 1246 | .....                                                                                                                                                    | 1395 |
| DC527884.1 | 1248 | .....                                                                                                                                                    | 1397 |
| BX426149.2 | 481  | .....                                                                                                                                                    | 332  |
| CO001006.1 | 527  | .....A.....C.....C.....T.....C.....T.....T.....T.....T.....C.....C.....T.....G.....C.....C.....T.....                                                    | 378  |
| BX418564.2 | 491  | .....                                                                                                                                                    | 342  |
| CF111220.1 | 1241 | .....C.....C.....A.....T.....C.....T.....AC.....T.....T.....C.....G.....T.....C.....                                                                     | 1390 |
| AL567209.3 | 452  | .....K.....                                                                                                                                              | 303  |
| BX440470.1 | 492  | .....                                                                                                                                                    | 343  |
| BX420340.1 | 486  | .....                                                                                                                                                    | 337  |
| AL518238.2 | 486  | .....                                                                                                                                                    | 337  |
| Query      | 1202 | AGAAGGCTGCTGGAGCTGGCAAGGTCCACCAAGTCTGCCCAGAAAGCTCAGAAGGCTAAATGAATATTCCCTAATACCTGCCACCCCACTCTTAATCAGTGGTGAAGAAGCGGTCTCAGAACTGTTGTTTCAATTGGCCATTTAAGTT     | 1351 |
| BY794942.2 | 1396 | .....                                                                                                                                                    | 1545 |
| DC527884.1 | 1398 | .....                                                                                                                                                    | 1547 |
| BX426149.2 | 331  | .....                                                                                                                                                    | 182  |
| CO001006.1 | 377  | .....A.....                                                                                                                                              | 228  |
| BX418564.2 | 341  | .....                                                                                                                                                    | 192  |
| CF111220.1 | 1391 | .....A.....A.....C.....G.....                                                                                                                            | 1540 |
| AL567209.3 | 302  | .....M.....Y.....                                                                                                                                        | 152  |
|            |      | .....\.....<br>..... .....<br>.....A.....                                                                                                                |      |
| BX440470.1 | 342  | .....                                                                                                                                                    | 193  |
| BX420340.1 | 336  | .....                                                                                                                                                    | 181  |

|            |      |                                                                                                                                                   |      |
|------------|------|---------------------------------------------------------------------------------------------------------------------------------------------------|------|
| AL518238.2 | 336  | .....G.....                                                                                                                                       | 187  |
| Query      | 1352 | TAGTAGTAAAGACTGGTTAATGATAACAATGCATCGTAAACCTTCAGAGGAAAGGAGAAATgttttgtggaccactttggttttttttgcgtgtggcagttttaagttattagtttttaaaatcagttacttttaATGGAAACAA | 1501 |
| BY794942.2 | 1546 | .....                                                                                                                                             | 1695 |
| DC527884.1 | 1548 | .....                                                                                                                                             | 1697 |
| BX426149.2 | 181  | .....A.....                                                                                                                                       | 33   |
| CO001006.1 | 227  | .....A.....                                                                                                                                       | 87   |
|            |      | \<br> <br>T                                                                                                                                       |      |
| BX418564.2 | 191  | .....                                                                                                                                             | 42   |
| CF111220.1 | 1541 | .....A.....                                                                                                                                       | 1679 |
| AL567209.3 | 151  | .....                                                                                                                                             | 4    |
|            |      | \<br> <br>G                                                                                                                                       |      |
| BX440470.1 | 192  | .....                                                                                                                                             | 43   |
| BX420340.1 | 186  | .....                                                                                                                                             | 37   |
| AL518238.2 | 186  | .....                                                                                                                                             | 37   |
|            |      | \<br> <br>A                                                                                                                                       |      |
| Query      | 1502 | CTTGACCAAAAATTGTGCACAGAATTTTGAGACCCATTAAGTAAATG                                                                                                   | 1553 |
| BY794942.2 | 1696 | .....                                                                                                                                             | 1747 |
| DC527884.1 | 1698 | .....                                                                                                                                             | 1749 |
| BX426149.2 | 32   | .....G.....G.....T..                                                                                                                              | 1    |
| CO001006.1 | 86   | .....C.....T..                                                                                                                                    | 35   |
|            |      | \<br> <br>A                                                                                                                                       |      |
| BX418564.2 | 41   | .....M.....                                                                                                                                       | 1    |
| CF111220.1 | 1680 | .....C.....T..                                                                                                                                    | 1731 |
|            |      | \<br> <br>C                                                                                                                                       |      |
| AL567209.3 | 3    | ....                                                                                                                                              | 1    |
| BX440470.1 | 42   | .....                                                                                                                                             | 1    |
| BX420340.1 | 36   | .....R.....                                                                                                                                       | 1    |
| AL518238.2 | 36   | .....N.....                                                                                                                                       | 1    |
|            |      | \<br> <br>N                                                                                                                                       |      |

Query= T8-26 [organism=Homo sapiens] eef1a1  
Length=1631

| Sequences producing significant alignments: |          |                                               | Score<br>(Bits) | E<br>Value | Max<br>ident |
|---------------------------------------------|----------|-----------------------------------------------|-----------------|------------|--------------|
| DC527884.1                                  | DC527884 | chimpanzee skin cDNA library PstA Pan trog... | 1724            | 0.0        | 100%         |
| AL541952.3                                  | AL541952 | Homo sapiens PLACENTA Homo sapiens cDNA cl... | 1716            | 0.0        | 100%         |
| AL559705.3                                  | AL559705 | Homo sapiens B CELLS (RAMOS CELL LINE) Hom... | 1711            | 0.0        | 100%         |
| AL557904.3                                  | AL557904 | Homo sapiens T CELLS (JURKAT CELL LINE) CO... | 1711            | 0.0        | 100%         |
| AL536241.3                                  | AL536241 | Homo sapiens FETAL BRAIN Homo sapiens cDNA... | 1711            | 0.0        | 100%         |
| BX459223.2                                  | BX459223 | Homo sapiens PLACENTA Homo sapiens cDNA cl... | 1711            | 0.0        | 100%         |
| BX459080.2                                  | BX459080 | Homo sapiens PLACENTA Homo sapiens cDNA cl... | 1711            | 0.0        | 100%         |
| BX417904.2                                  | BX417904 | Homo sapiens PLACENTA Homo sapiens cDNA cl... | 1711            | 0.0        | 100%         |
| BX417296.2                                  | BX417296 | Homo sapiens PLACENTA Homo sapiens cDNA cl... | 1711            | 0.0        | 100%         |
| BX440304.2                                  | BX440304 | Homo sapiens FETAL BRAIN Homo sapiens cDNA... | 1707            | 0.0        | 100%         |

| ALIGNMENTS |     |                                                                                                                                                     |     |  |
|------------|-----|-----------------------------------------------------------------------------------------------------------------------------------------------------|-----|--|
| Query      | 2   | TTTTTCGCAACGGGTTTGCCGCCAGACACAGGTGTCGTGAAAACTACCCCTAAAAAGCCAAAATGGGAAGGAAAAAGACTCATATCAACATTGTCGTGATTGGACACGTAGATTGGGCAAGTCCACCCTACTGCCCTCTGATCTAT  | 151 |  |
| DC527884.1 | 9   | .....                                                                                                                                               | 157 |  |
| AL541952.3 | 1   | .....A.....                                                                                                                                         | 139 |  |
| AL559705.3 | 1   | .....A.....                                                                                                                                         | 139 |  |
| AL557904.3 | 1   | .....A.....                                                                                                                                         | 139 |  |
| AL536241.3 | 1   | .....A.....                                                                                                                                         | 139 |  |
| BX459223.2 | 1   | .....A.....                                                                                                                                         | 139 |  |
| BX459080.2 | 1   | .....A.....                                                                                                                                         | 139 |  |
| BX417904.2 | 1   | .....A.....                                                                                                                                         | 139 |  |
| BX417296.2 | 1   | .....A.....                                                                                                                                         | 139 |  |
| BX440304.2 | 1   | .....A.....                                                                                                                                         | 139 |  |
| Query      | 152 | AAATGCGGTGGCATCGACAAAAGAACCATTTGAAAAATTTGAGAAGGAGGCTGCTGAGATGGGAAAGGCTCCTTCAAGTATGCTGGGTCTTGATAAACTGAAAGCTGAGCGTGAACGTGGTATCACCATTGATATCTCTTGTGGAAA | 301 |  |
| DC527884.1 | 158 | .....T.....                                                                                                                                         | 307 |  |
| AL541952.3 | 140 | .....                                                                                                                                               | 289 |  |
| AL559705.3 | 140 | .....                                                                                                                                               | 289 |  |
| AL557904.3 | 140 | .....                                                                                                                                               | 289 |  |
| AL536241.3 | 140 | .....                                                                                                                                               | 289 |  |
| BX459223.2 | 140 | .....                                                                                                                                               | 289 |  |
| BX459080.2 | 140 | .....                                                                                                                                               | 289 |  |

|            |      |                                                                                                                                                          |      |
|------------|------|----------------------------------------------------------------------------------------------------------------------------------------------------------|------|
| BX417904.2 | 140  | .....                                                                                                                                                    | 289  |
| BX417296.2 | 140  | .....                                                                                                                                                    | 289  |
| BX440304.2 | 140  | .....                                                                                                                                                    | 289  |
| Query      | 302  | TTTGAGACCAGCAAGTACTATGTGACTATCATTGATGCCCCAGGACACAGAGACTTTATCAAAAAACATGATTACAGGGACATCTCAGGCTGACTGTGCTGTCTGATTGTTGCTGCTGGTGGTGAATTTGAAGCTGGTATCTCCAAG      | 451  |
| DC527884.1 | 308  | .....C.....                                                                                                                                              | 457  |
| AL541952.3 | 290  | .....                                                                                                                                                    | 439  |
| AL559705.3 | 290  | .....                                                                                                                                                    | 439  |
| AL557904.3 | 290  | .....                                                                                                                                                    | 439  |
| AL536241.3 | 290  | .....                                                                                                                                                    | 439  |
| BX459223.2 | 290  | .....                                                                                                                                                    | 439  |
| BX459080.2 | 290  | .....                                                                                                                                                    | 439  |
| BX417904.2 | 290  | .....                                                                                                                                                    | 439  |
| BX417296.2 | 290  | .....                                                                                                                                                    | 439  |
| BX440304.2 | 290  | .....                                                                                                                                                    | 439  |
| Query      | 452  | AATGGGCAGACCCGAGAGCATGCCCTTCTGGCTTACACACTGGGTGTGAAACAACATAATTGTCGGTGTAAACAAAATGGATTCCACTGAGCCACCCCTACAGCCAGAAGATATGAGGAAATTGTTAAGGAAGTCAGCACTTACATTAAAG  | 601  |
| DC527884.1 | 458  | .....                                                                                                                                                    | 607  |
| AL541952.3 | 440  | .....                                                                                                                                                    | 589  |
| AL559705.3 | 440  | .....                                                                                                                                                    | 589  |
| AL557904.3 | 440  | .....                                                                                                                                                    | 589  |
| AL536241.3 | 440  | .....                                                                                                                                                    | 589  |
| BX459223.2 | 440  | .....                                                                                                                                                    | 589  |
| BX459080.2 | 440  | .....                                                                                                                                                    | 589  |
| BX417904.2 | 440  | .....                                                                                                                                                    | 589  |
| BX417296.2 | 440  | .....                                                                                                                                                    | 589  |
| BX440304.2 | 440  | .....                                                                                                                                                    | 589  |
| Query      | 602  | AAAATTGGCTACAAACCCGACACAGTAGCATTGTGCCAATTTCTGGTTGGAATGGTGACACATGCTGGAGCCAGTGTAAACATGCCCTTGGTTCAAGGGATGGAAAGTCACCCGTAAGGATGGCAATGCCAGTGGAAACCGCTGCTT      | 751  |
| DC527884.1 | 608  | .....                                                                                                                                                    | 757  |
| AL541952.3 | 590  | .....                                                                                                                                                    | 739  |
| AL559705.3 | 590  | .....                                                                                                                                                    | 739  |
| AL557904.3 | 590  | .....                                                                                                                                                    | 739  |
| AL536241.3 | 590  | .....                                                                                                                                                    | 739  |
| BX459223.2 | 590  | .....                                                                                                                                                    | 739  |
| BX459080.2 | 590  | .....                                                                                                                                                    | 739  |
| BX417904.2 | 590  | .....                                                                                                                                                    | 739  |
| BX417296.2 | 590  | .....                                                                                                                                                    | 739  |
| BX440304.2 | 590  | .....                                                                                                                                                    | 740  |
| \          |      |                                                                                                                                                          |      |
|            |      |                                                                                                                                                          |      |
| T          |      |                                                                                                                                                          |      |
| Query      | 752  | GAGGCTCTGGACTGCATCTTACCACCAACTCGTCCAACCTGACAAGCCCTTGGCGCTGCCTCTCCAGGATGTCTACAAAATTGGTGGTATTGGTACTGTTCTGTTGGCCGAGTGGAGACTGGTGTTCCTCAAAACCCGGTATGGTGGTCACC | 901  |
| DC527884.1 | 758  | .....                                                                                                                                                    | 907  |
| AL541952.3 | 740  | .....                                                                                                                                                    | 889  |
| AL559705.3 | 740  | .....                                                                                                                                                    | 889  |
| AL557904.3 | 740  | .....                                                                                                                                                    | 889  |
| AL536241.3 | 740  | .....                                                                                                                                                    | 889  |
| BX459223.2 | 740  | .....                                                                                                                                                    | 889  |
| BX459080.2 | 740  | .....                                                                                                                                                    | 889  |
| BX417904.2 | 740  | .....                                                                                                                                                    | 889  |
| BX417296.2 | 740  | .....                                                                                                                                                    | 889  |
| BX440304.2 | 741  | .....                                                                                                                                                    | 890  |
| Query      | 902  | TTTGCTCCAGTCAACGTTTACAACGGAAGTAAATCTGTGAAAATGACCCCAATGGAAGCAGCTGGCTTCACTGCTCAGGTGATTATCCTGAACCATCCAGGCCAAATAAGCGCCGGCTATGCCCTGTATTGGATTGCCACACGGCT       | 1051 |
| DC527884.1 | 908  | .....                                                                                                                                                    | 950  |
| DC527884.1 | 1059 | .....                                                                                                                                                    | 1168 |
| AL541952.3 | 890  | .....                                                                                                                                                    | 935  |
| AL559705.3 | 890  | .....                                                                                                                                                    | 932  |
| AL557904.3 | 890  | .....                                                                                                                                                    | 932  |
| AL536241.3 | 890  | .....                                                                                                                                                    | 932  |
| BX459223.2 | 890  | .....                                                                                                                                                    | 932  |
| BX459080.2 | 890  | .....                                                                                                                                                    | 932  |
| BX417904.2 | 890  | .....                                                                                                                                                    | 932  |
| BX417296.2 | 890  | .....                                                                                                                                                    | 932  |
| BX440304.2 | 891  | .....                                                                                                                                                    | 933  |
| Query      | 1052 | CACATTGCATGCAAGTTTGTGAGCTGAAGGAAAAGATTGATCGCCGTCTGGTAAAAAGCTGGAAGATGGCCCTAAATTTCTGAAGTCTGGTGATGCTGCCATTGTTGATATGGTTCTTGGCAAGCCCATGTGTGTGAGAGCTTTCTCA     | 1201 |
| DC527884.1 | 1169 | .....                                                                                                                                                    | 1318 |
| Query      | 1202 | GACTATCCACCTTTGGGTGCTTTTGTGTTCTGTGATATGAGACAGACAGTTGCGGTGGGTGTCATCAAAGCAGTGGCAAGAAGGCTGCTGGAGCTGGCAAGGTACCAAGTCTGCCAGAAAGCTCAGAAGGCTAAATGAATATTATCC      | 1351 |
| DC527884.1 | 1319 | .....A.....                                                                                                                                              | 1468 |
| Query      | 1352 | CTAATACCTGCCACCCCACTCTTAATCAGTGGTGAAGAACGGTCTCAGAAGCTTTGTTTCAATTGGCCATTAAAGTTTAGTAGTAAAGACTGGTTAATGATAACAATGCATCGTAAACCTTCAGAAGGAAAGGAGAATgtttttgtg      | 1501 |
| DC527884.1 | 1469 | .....C.....                                                                                                                                              | 1618 |
| Query      | 1502 | gaccactttgggttttcttttttgcgtgtggcagttttaagtattagttttttaaatcagtactttttaATGGAAACAACCTTGACCAAAAATTTGTACAGAATTTTGAGACCCATTAAAAAGTTAAAT                        | 1631 |
| DC527884.1 | 1619 | .....                                                                                                                                                    | 1748 |

Query= T9-28 [organism=Homo sapiens] eef1a1

Length=1433

| Sequences producing significant alignments: |          |                                               | Score<br>(Bits) | E<br>Value | Max<br>ident |
|---------------------------------------------|----------|-----------------------------------------------|-----------------|------------|--------------|
| DC527884.1                                  | DC527884 | chimpanzee skin cDNA library PstA Pan trog... | 1969            | 0.0        | 100%         |
| BY794942.2                                  | BY794942 | Homo sapiens eye Homo sapiens cDNA clone H... | 1945            | 0.0        | 100%         |
| DC629953.1                                  | DC629953 | macaque bone marrow cDNA library QbmA Maca... | 1941            | 0.0        | 96%          |
| BX426072.2                                  | BX426072 | Homo sapiens NEUROBLASTOMA Homo sapiens cD... | 1910            | 0.0        | 100%         |
| FS580102.1                                  | FS580102 | macaque heart cDNA library QhtB Macaca fas... | 1906            | 0.0        | 99%          |
| BX440468.2                                  | BX440468 | Homo sapiens FETAL BRAIN Homo sapiens cDNA... | 1905            | 0.0        | 99%          |
| BX440573.2                                  | BX440573 | Homo sapiens FETAL BRAIN Homo sapiens cDNA... | 1903            | 0.0        | 100%         |
| BX426150.2                                  | BX426150 | Homo sapiens NEUROBLASTOMA Homo sapiens cD... | 1899            | 0.0        | 99%          |
| BX402793.2                                  | BX402793 | Homo sapiens T CELLS (JURKAT CELL LINE) CO... | 1899            | 0.0        | 99%          |
| AL528506.3                                  | AL528506 | Homo sapiens NEUROBLASTOMA COT 25-NORMALIZ... | 1897            | 0.0        | 99%          |

ALIGNMENTS

|            |     |                                                                                                |                                                                                                                                 |                                                                           |                                    |     |
|------------|-----|------------------------------------------------------------------------------------------------|---------------------------------------------------------------------------------------------------------------------------------|---------------------------------------------------------------------------|------------------------------------|-----|
| Query      | 1   | CTTTTTCGCAACGGGTTTGC                                                                           | CGCCAGAACACAGGTGTCGTGAA                                                                                                         | AACTACCCCTAAAAAGCCAAAATGGGAAAGGAAAAGACTCATATCAACATTGTCGTCATTGGACACGTAGATT | CGGGCAAGTCCACCACTACTGGCCATCTGATCTA | 150 |
| DC527884.1 | 9   | .....                                                                                          | .....                                                                                                                           | .....                                                                     | .....                              | 156 |
| BY794942.2 | 25  | .....                                                                                          | .....                                                                                                                           | .....                                                                     | .....                              | 153 |
| DC629953.1 | 1   | .....                                                                                          | .....                                                                                                                           | .....                                                                     | .....                              | 149 |
| BX426072.2 | 1   | .....                                                                                          | .....                                                                                                                           | .....                                                                     | .....                              | 119 |
| FS580102.1 | 1   | .....                                                                                          | .....                                                                                                                           | .....                                                                     | .....                              | 149 |
| BX440468.2 | 1   | .....                                                                                          | .....                                                                                                                           | .....                                                                     | .....                              | 128 |
| BX440573.2 | 1   | .....                                                                                          | .....                                                                                                                           | .....                                                                     | .....                              | 119 |
| BX426150.2 | 1   | .....T.....                                                                                    | .....                                                                                                                           | .....                                                                     | .....                              | 124 |
| BX402793.2 | 6   | .....                                                                                          | .....                                                                                                                           | .....                                                                     | .....                              | 137 |
| AL528506.3 | 1   | .....                                                                                          | .....                                                                                                                           | .....                                                                     | .....                              | 119 |
| Query      | 151 | TAAATGCGGTGGCATCGACAAA                                                                         | AGAACCATTTGAAAAATTTGAGAAGGAGGCTGCTGAGATGGGAAAGGGCTCCTTCAAGTATGCCTGGGTC                                                          | TTGGATAAACTGAAAGCTGAGCGTGAACGTGGTATCACCATTGATATCTCCTTGTGGAA               | 300                                |     |
| DC527884.1 | 157 | .....                                                                                          | .....                                                                                                                           | .....T.....                                                               | .....                              | 306 |
| BY794942.2 | 154 | .....                                                                                          | .....                                                                                                                           | .....                                                                     | .....                              | 303 |
| DC629953.1 | 150 | C.....                                                                                         | .....                                                                                                                           | .....G.....                                                               | .....                              | 299 |
| BX426072.2 | 120 | .....                                                                                          | .....                                                                                                                           | .....                                                                     | .....                              | 269 |
| FS580102.1 | 150 | C.....                                                                                         | .....                                                                                                                           | .....G.....                                                               | .....                              | 299 |
| BX440468.2 | 129 | .....                                                                                          | .....                                                                                                                           | .....                                                                     | .....                              | 278 |
| BX440573.2 | 120 | .....                                                                                          | .....                                                                                                                           | .....                                                                     | .....                              | 269 |
| BX426150.2 | 125 | .....                                                                                          | .....                                                                                                                           | .....                                                                     | .....                              | 274 |
| BX402793.2 | 138 | .....                                                                                          | .....                                                                                                                           | .....                                                                     | .....                              | 287 |
| AL528506.3 | 120 | .....                                                                                          | .....                                                                                                                           | .....                                                                     | .....                              | 269 |
| Query      | 301 | ATTTGAGACCAGCAAGTACTATGT                                                                       | GACTATCATTGATGCCCCAGGACACAGAGACTTTTATCAAAAACATGATTACAGGGACATCTCAGGCTGACTGTGCTGCTCCTGATTGTTGCTGCTGGTGTGGTGAATTTGAAGCTGGTATCTCCAA | 450                                                                       |                                    |     |
| DC527884.1 | 307 | .....                                                                                          | .....C.....                                                                                                                     | .....                                                                     | .....                              | 456 |
| BY794942.2 | 304 | .....                                                                                          | .....                                                                                                                           | .....                                                                     | .....                              | 453 |
| DC629953.1 | 300 | .....T.....                                                                                    | .....C.....                                                                                                                     | .....                                                                     | .....                              | 449 |
| BX426072.2 | 270 | .....                                                                                          | .....                                                                                                                           | .....                                                                     | .....                              | 419 |
| FS580102.1 | 300 | .....T.....                                                                                    | .....C.....                                                                                                                     | .....                                                                     | .....                              | 449 |
| BX440468.2 | 279 | .....                                                                                          | .....                                                                                                                           | .....                                                                     | .....                              | 428 |
| BX440573.2 | 270 | .....                                                                                          | .....                                                                                                                           | .....                                                                     | .....                              | 419 |
| BX426150.2 | 275 | .....                                                                                          | .....                                                                                                                           | .....                                                                     | .....                              | 424 |
| BX402793.2 | 288 | .....                                                                                          | .....                                                                                                                           | .....                                                                     | .....                              | 437 |
| AL528506.3 | 270 | .....                                                                                          | .....                                                                                                                           | .....                                                                     | .....                              | 419 |
| Query      | 451 | GAATGGGCAGACCCGAGAGCATGCC                                                                      | CTTCTGGCTTACACACTGGGTGTGAAACAACATAATTGTCGGTGTTAACAAAATGGATTCCACTGAGCCACCCTACAGCCAGAGAGATATGAGGAAATTTGTTAAGGAAGTCAGCACTTACATTAA  | 600                                                                       |                                    |     |
| DC527884.1 | 457 | .....                                                                                          | .....                                                                                                                           | .....                                                                     | .....                              | 606 |
| BY794942.2 | 454 | .....                                                                                          | .....                                                                                                                           | .....                                                                     | .....                              | 603 |
| DC629953.1 | 450 | .....T.....                                                                                    | .....                                                                                                                           | .....T.....                                                               | .....C.....C.....                  | 599 |
| BX426072.2 | 420 | .....                                                                                          | .....                                                                                                                           | .....                                                                     | .....                              | 569 |
| FS580102.1 | 450 | .....T.....                                                                                    | .....                                                                                                                           | .....T.....                                                               | .....C.....                        | 599 |
| BX440468.2 | 429 | .....                                                                                          | .....                                                                                                                           | .....                                                                     | .....C.....                        | 578 |
| BX440573.2 | 420 | .....                                                                                          | .....                                                                                                                           | .....                                                                     | .....                              | 569 |
| BX426150.2 | 425 | .....                                                                                          | .....                                                                                                                           | .....                                                                     | .....                              | 574 |
| BX402793.2 | 438 | .....                                                                                          | .....                                                                                                                           | .....                                                                     | .....                              | 587 |
| AL528506.3 | 420 | .....                                                                                          | .....                                                                                                                           | .....                                                                     | .....                              | 569 |
| Query      | 601 | GAAATTTGGCTACAACCCGACACAGTAGCATTTGTGCCAATTTCTGGTTGGAATGGTGACAACATGCTGGAGCCAAAGTGCTAACATGCCCTTG | TTTCAAGGGATGGAAGTCAACCGTAAGGATGGCAATGCCAGTGGAAACCAAGCTGCT                                                                       | 750                                                                       |                                    |     |
| DC527884.1 | 607 | .....                                                                                          | .....                                                                                                                           | .....                                                                     | .....                              | 756 |
| BY794942.2 | 604 | .....                                                                                          | .....                                                                                                                           | .....                                                                     | .....                              | 753 |
| DC629953.1 | 600 | .....                                                                                          | .....                                                                                                                           | .....                                                                     | .....G.....                        | 749 |
| BX426072.2 | 570 | .....                                                                                          | .....                                                                                                                           | .....                                                                     | .....                              | 719 |
| FS580102.1 | 600 | .....                                                                                          | .....                                                                                                                           | .....                                                                     | .....G.....                        | 749 |
| BX440468.2 | 579 | .....                                                                                          | .....                                                                                                                           | .....                                                                     | .....                              | 727 |
| BX440573.2 | 570 | .....                                                                                          | .....                                                                                                                           | .....                                                                     | .....                              | 719 |
| BX426150.2 | 575 | .....                                                                                          | .....                                                                                                                           | .....                                                                     | .....                              | 724 |
| BX402793.2 | 588 | .....                                                                                          | .....                                                                                                                           | .....                                                                     | .....                              | 737 |
| AL528506.3 | 570 | .....                                                                                          | .....                                                                                                                           | .....                                                                     | .....                              | 719 |
| Query      | 751 | TGAGGCTCTGGACTGCATCCTACCACCAACTCGTCCAATGACAAGCCCTTGC                                           | GCTGCCCTCCAGGATGTTCTACAAAATTTGGTGGTATTGGTACTGTTCTGTTGGCCGAGTGGAGACTGGTGTCTCAAACCCGGTATGGTGGTCAC                                 | 900                                                                       |                                    |     |
| DC527884.1 | 757 | .....                                                                                          | .....                                                                                                                           | .....                                                                     | .....                              | 906 |
| BY794942.2 | 754 | .....                                                                                          | .....                                                                                                                           | .....                                                                     | .....                              | 903 |



|            |          |              |             |                         |      |     |      |
|------------|----------|--------------|-------------|-------------------------|------|-----|------|
| BX442182.2 | BX442182 | Homo sapiens | FETAL BRAIN | Homo sapiens cDNA...    | 1871 | 0.0 | 100% |
| BX459625.2 | BX459625 | Homo sapiens | FETAL BRAIN | Homo sapiens cDNA...    | 1866 | 0.0 | 100% |
| BX420340.1 | BX420340 | Homo sapiens | FETAL BRAIN | Homo sapiens cDNA...    | 1864 | 0.0 | 100% |
| BX418564.2 | BX418564 | Homo sapiens | FETAL BRAIN | Homo sapiens cDNA...    | 1862 | 0.0 | 99%  |
| BX440436.2 | BX440436 | Homo sapiens | FETAL BRAIN | Homo sapiens cDNA...    | 1857 | 0.0 | 99%  |
| AL541984.3 | AL541984 | Homo sapiens | PLACENTA    | Homo sapiens cDNA cl... | 1855 | 0.0 | 100% |

ALIGNMENTS

|            |      |                                                                                                                                                       |      |
|------------|------|-------------------------------------------------------------------------------------------------------------------------------------------------------|------|
| Query      | 2    | TTTTTCGCAACGGGTTTGCCGCCAGACACAGGTGTCGTGAAAACTACCCCTAAAAGCCAAAATGGGAAGGAAAGACTCATATCAACATTGTCGTCTTGGACACGTAGATTGGGCAAGTCCACCACTACTGGCCATCTGATCTATA     | 151  |
| BY794942.2 | 25   | .....                                                                                                                                                 | 155  |
| DC527884.1 | 9    | .....                                                                                                                                                 | 158  |
| Query      | 152  | AATGCGGTGGCATCGACAAAAGAACATTGAAAAATTTGAGAAGGAGCGTGCTGAGATGGGAAAGGGCTCCTTCAAGTATGCCTGGTCTTGATAAACTGAAAGCTGAGCGTGAACTGGTATCACCATTGATATCTCCTTGTGGAATTT   | 301  |
| BY794942.2 | 156  | .....                                                                                                                                                 | 306  |
| DC527884.1 | 159  | .....G.....T.....                                                                                                                                     | 309  |
| Query      | 302  | TGAGACAGCAAGTACTATGTGACTATCATTGATGCCCAGGACACAGAGACTTTATCAAAAACATGATTACAGGGACATCTCAGGCTGACTGTGCTGTCTGATTGTGTCTGCTGGTGTGGTGAATTTGAAGCTGGTATCTCCAAGAAATG | 451  |
| BY794942.2 | 307  | .....                                                                                                                                                 | 458  |
| DC527884.1 | 310  | .....C.....                                                                                                                                           | 461  |
| Query      | 452  | GGCAGACCCGAGAGCATGCCCTTCTGGCTTACACACTGGGTGTGAAACAACATAATTGTCGGTGTAAACAAATGGATTCCACTGAGCCACCTTACAGCCAGAAGATATGAGGAAATTGTTAAGGAAGTCAaaaaaaaaaaaaaaaa    | 601  |
| BY794942.2 | 459  | .....                                                                                                                                                 | 590  |
| DC527884.1 | 462  | .....                                                                                                                                                 | 593  |
| Query      | 602  | aaaaaaaaaaaaaaaaTTGTTAAAGGAAGTCACCCGTAAGGATGGCAATGCCAGTGGAAACACCGTGCTTGAGGCTCTGGACTGCATCCTACCACTCGTCCAAGTCAAGCCCTTGCGCCTGCCTCTCCAGGATGTCTACAAAATT     | 751  |
| BY794942.2 | 711  | .....                                                                                                                                                 | 835  |
| DC527884.1 | 714  | .....                                                                                                                                                 | 838  |
| BX440470.1 | 1027 | .....R.....                                                                                                                                           | 903  |
| BX418589.2 | 1026 | .....                                                                                                                                                 | 902  |
| BX442182.2 | 1019 | .....                                                                                                                                                 | 895  |
| BX459625.2 | 1014 | .....                                                                                                                                                 | 890  |
| BX420340.1 | 1020 | .....A.....R.....C.....                                                                                                                               | 896  |
| BX418564.2 | 1025 | .....                                                                                                                                                 | 901  |
| BX440436.2 | 1026 | .....-YK.....R.....                                                                                                                                   | 905  |
| AL541984.3 | 1    | .....                                                                                                                                                 | 104  |
| Query      | 752  | GGTGGTATTGGTACTGTCTCTGTTGGCCGAGTGGAGACTGGTGTCTCAAAACCCGATGTTGGTGGTCACCTTTTGCTCCAGTCAACGTTACAACGGAAGTAAATCTGTGAAATGCACATGAAGCTTTGAGTGAAGCTCTTCTTGGGGAC | 901  |
| BY794942.2 | 836  | .....                                                                                                                                                 | 985  |
| DC527884.1 | 839  | .....                                                                                                                                                 | 988  |
| BX440470.1 | 902  | .....                                                                                                                                                 | 753  |
| BX418589.2 | 901  | .....                                                                                                                                                 | 752  |
| BX442182.2 | 894  | .....R.....                                                                                                                                           | 745  |
| BX459625.2 | 889  | .....                                                                                                                                                 | 740  |
| BX420340.1 | 895  | .....                                                                                                                                                 | 746  |
| BX418564.2 | 900  | .....                                                                                                                                                 | 751  |
| BX440436.2 | 904  | .....                                                                                                                                                 | 755  |
| AL541984.3 | 105  | .....                                                                                                                                                 | 254  |
| Query      | 902  | AATGTGGGCTTCAATGTCAGAATGTGTCTGTCAAGGATGTTCTGCTGGCAACGTTGCTGGTGACAGCAAAATGACCCCAATGGAAGCAGCTGGCTTCACTGCTCAGGTGATTATCTGAACCATCCAGGCCAAATAAGCGCCGCGC     | 1051 |
| BY794942.2 | 986  | .....                                                                                                                                                 | 1136 |
| DC527884.1 | 989  | .....G.....                                                                                                                                           | 1138 |
| BX440470.1 | 752  | .....                                                                                                                                                 | 603  |
| BX418589.2 | 751  | .....                                                                                                                                                 | 602  |
| BX442182.2 | 744  | .....                                                                                                                                                 | 595  |
| BX459625.2 | 739  | .....                                                                                                                                                 | 590  |
| BX420340.1 | 745  | .....                                                                                                                                                 | 596  |
| BX418564.2 | 750  | .....C.....                                                                                                                                           | 601  |
| BX440436.2 | 754  | .....                                                                                                                                                 | 605  |
| AL541984.3 | 255  | .....                                                                                                                                                 | 404  |
| Query      | 1052 | TATGCCCTGTATTGGATTGCCACACGGCTCACATTGCATGCAAGTTTGTCTGAGCTGAAGGAAAGATTGATCGCCGTTCTGGTAAAAGCTGGAAGATGGCCCTAAATTCCTGAAGTCTGGTGATGCTGCCATTGTTGATATGGTTCTCT | 1201 |
| BY794942.2 | 1137 | .....                                                                                                                                                 | 1286 |
| DC527884.1 | 1139 | .....                                                                                                                                                 | 1288 |
| BX440470.1 | 602  | .....                                                                                                                                                 | 452  |

|            |      |                                                                                                                                                       |      |
|------------|------|-------------------------------------------------------------------------------------------------------------------------------------------------------|------|
| BX418589.2 | 601  | .....C.....Y.S.....                                                                                                                                   | 452  |
| BX442182.2 | 594  | .....                                                                                                                                                 | 445  |
| BX459625.2 | 589  | .....                                                                                                                                                 | 440  |
| BX420340.1 | 595  | .....                                                                                                                                                 | 446  |
| BX418564.2 | 600  | .....M.....                                                                                                                                           | 451  |
| BX440436.2 | 604  | .....                                                                                                                                                 | 455  |
| AL541984.3 | 405  | .....                                                                                                                                                 | 554  |
| Query      | 1202 | GGCAAGCCCATGTGTGTTGAGAGCTTCTCAGACTATCCACCTTTGGGTCGGCTTTGCTGTTGCGTATGAGACAGACAGTTGCGGTGGGTGTCATCAAAGCAGTGGACAAGAAGGCTGCTGGAGCTGGCAAGGTCACCAAGTCTGCCCAG | 1351 |
| BY794942.2 | 1287 | .....                                                                                                                                                 | 1436 |
| DC527884.1 | 1289 | .....A.....                                                                                                                                           | 1438 |
| BX440470.1 | 451  | .....                                                                                                                                                 | 302  |
| BX418589.2 | 451  | .....                                                                                                                                                 | 302  |
| BX442182.2 | 444  | .....                                                                                                                                                 | 295  |
| BX459625.2 | 439  | .....                                                                                                                                                 | 290  |
| BX420340.1 | 445  | .....                                                                                                                                                 | 296  |
| BX418564.2 | 450  | .....                                                                                                                                                 | 301  |
| BX440436.2 | 454  | .....                                                                                                                                                 | 305  |
| AL541984.3 | 555  | .....                                                                                                                                                 | 704  |
| Query      | 1352 | AAAGCTCAGAAGGCTAAATGAATATTATCCCTAATACCTGCCACCCCACTCTTAATCAGTGGTGAAGAACGGTCTCAGAACTGTTTGTTCATTGGCCATTTAAGTTTAGTAGTAAAGACTGGTTAATGATAACAATGCATCGTAAA    | 1501 |
| BY794942.2 | 1437 | .....                                                                                                                                                 | 1586 |
| DC527884.1 | 1439 | .....C.....                                                                                                                                           | 1588 |
| BX440470.1 | 301  | .....                                                                                                                                                 | 152  |
| BX418589.2 | 301  | .....                                                                                                                                                 | 152  |
| BX442182.2 | 294  | .....                                                                                                                                                 | 145  |
| BX459625.2 | 289  | .....                                                                                                                                                 | 140  |
| BX420340.1 | 295  | .....                                                                                                                                                 | 146  |
| BX418564.2 | 300  | .....                                                                                                                                                 | 151  |
| BX440436.2 | 304  | .....                                                                                                                                                 | 155  |
| AL541984.3 | 705  | .....                                                                                                                                                 | 854  |
| Query      | 1502 | ACCTTCAGAAGGAAAGGAGAATgttttggaccactttgggttttttttttgcgtgtggcagttttaagttattagtttttaaaatcagtaactttttaATGGAACAACCTTGACCAAAAATTTGTACAGAATTTTGAGACCCATTAAAA | 1651 |
| BY794942.2 | 1587 | .....                                                                                                                                                 | 1737 |
|            |      | \                                                                                                                                                     |      |
|            |      |                                                                                                                                                       |      |
|            |      | C                                                                                                                                                     |      |
| DC527884.1 | 1589 | .....                                                                                                                                                 | 1739 |
|            |      | \                                                                                                                                                     |      |
|            |      |                                                                                                                                                       |      |
|            |      | C                                                                                                                                                     |      |
| BX440470.1 | 151  | .....                                                                                                                                                 | 1    |
|            |      | \                                                                                                                                                     |      |
|            |      |                                                                                                                                                       |      |
|            |      | C                                                                                                                                                     |      |
| BX418589.2 | 151  | .....D.....                                                                                                                                           | 1    |
|            |      | \                                                                                                                                                     |      |
|            |      |                                                                                                                                                       |      |
|            |      | C                                                                                                                                                     |      |
| BX442182.2 | 144  | .....                                                                                                                                                 | 1    |
|            |      | \                                                                                                                                                     |      |
|            |      |                                                                                                                                                       |      |
|            |      | C                                                                                                                                                     |      |
| BX459625.2 | 139  | .....                                                                                                                                                 | 1    |
|            |      | \                                                                                                                                                     |      |
|            |      |                                                                                                                                                       |      |
|            |      | C                                                                                                                                                     |      |
| BX420340.1 | 145  | .....R.....                                                                                                                                           | 1    |
|            |      | \                                                                                                                                                     |      |
|            |      |                                                                                                                                                       |      |
|            |      | C                                                                                                                                                     |      |
| BX418564.2 | 150  | .....M.....                                                                                                                                           | 1    |
|            |      | \                                                                                                                                                     |      |
|            |      |                                                                                                                                                       |      |
|            |      | C                                                                                                                                                     |      |
| BX440436.2 | 154  | .....                                                                                                                                                 | 3    |
|            |      | \ \                                                                                                                                                   |      |
|            |      |                                                                                                                                                       |      |
|            |      | N N                                                                                                                                                   |      |
| AL541984.3 | 855  | .....K.S.....                                                                                                                                         | 1006 |
|            |      | \ \                                                                                                                                                   |      |
|            |      |                                                                                                                                                       |      |
|            |      | C M                                                                                                                                                   |      |
| Query      | 1652 | AAGTTAAAT                                                                                                                                             | 1660 |
| BY794942.2 | 1738 | .....                                                                                                                                                 | 1746 |
| DC527884.1 | 1740 | .....                                                                                                                                                 | 1748 |
| BX440436.2 | 2    | ..                                                                                                                                                    | 1    |
| AL541984.3 | 1007 | .....                                                                                                                                                 | 1015 |

Query= T11-30 [organism=Homo sapiens] eef1a1

| Sequences producing significant alignments: |                                                        | Score<br>(Bits) | E<br>Value | Max<br>ident |
|---------------------------------------------|--------------------------------------------------------|-----------------|------------|--------------|
| AU120002.1                                  | AU120002 HEMBA1 Homo sapiens cDNA clone HEMBA100713... | 1356            | 0.0        | 99%          |
| CJ434202.1                                  | CJ434202 macaque brain cDNA library QccE Macaca fas... | 1216            | 0.0        | 96%          |
| CR976939.1                                  | CR976939 RZPD no.9016 Homo sapiens cDNA clone RZPdp... | 1149            | 0.0        | 99%          |
| CB138394.1                                  | K-EST0191255 L15CKK1 Homo sapiens cDNA clone L15CKK... | 1064            | 0.0        | 97%          |
| GR891610.1                                  | CANFLECK JINDO BR_55_A03.abl Jindo brain cDNA libra... | 1035            | 0.0        | 92%          |
| DC519934.1                                  | DC519934 chimpanzee brain cDNA library PccB Pan tro... | 996             | 0.0        | 97%          |
| AU296783.1                                  | AU296783 female adult cerebellum, full-length enric... | 996             | 0.0        | 97%          |
| CD466199.1                                  | LeukoN2_2_E07.g1_A024 Unstimulated peripheral blood... | 955             | 0.0        | 91%          |
| AU144980.1                                  | AU144980 HEMBA1 Homo sapiens cDNA clone HEMBA100353... | 935             | 0.0        | 95%          |
| DA429743.1                                  | DA429743 COLON2 Homo sapiens cDNA clone COLON200583... | 926             | 0.0        | 97%          |

ALIGNMENTS

|            |     |                                                                                                                                                            |     |
|------------|-----|------------------------------------------------------------------------------------------------------------------------------------------------------------|-----|
| Query      | 3   | TTTTTCGCAACGGGTTTGCCGCCAGAACACAGGTGTCGTGAAAACACTACCCTAAAAGCCAAATGGGAAGGAAAGAAAGACTCATATCAACATTGTCGTCATTGGACACGTAGATTCGGGCAAGTCCACCACACTACTGCCCATCTGATCTATA | 152 |
| AU120002.1 | 2   | .....                                                                                                                                                      | 151 |
| CJ434202.1 | 30  | .....                                                                                                                                                      | 177 |
| CR976939.1 | 1   | .....                                                                                                                                                      | 33  |
| CB138394.1 | 1   | .....                                                                                                                                                      | 4   |
| GR891610.1 | 1   | .....C...G....A.....G.....C.....C.....T.....T.....C.                                                                                                       | 144 |
|            |     | \ \                                                                                                                                                        |     |
|            |     | CCC                                                                                                                                                        |     |
|            |     |                                                                                                                                                            |     |
|            |     | T                                                                                                                                                          |     |
| DC519934.1 | 2   | .....N.....                                                                                                                                                | 151 |
| AU296783.1 | 2   | .....N.....                                                                                                                                                | 151 |
| CD466199.1 | 2   | .....C.....AA.....G.....C.....G.....C.....G.....C.....C.                                                                                                   | 155 |
|            |     | \ \                                                                                                                                                        |     |
|            |     | AA \                                                                                                                                                       |     |
|            |     | TCT                                                                                                                                                        |     |
| DA429743.1 | 2   | .....                                                                                                                                                      | 151 |
| Query      | 153 | AATGCGGTGGCCTCGACAAAGAACCATTGAAAAATTTGAGAAGGAGGCTGCTGAGATGGGAAAGGGCTCCTTCAAGTAGCCTGGGTCCTTGGATAAACTGAAAGCTGAGCGTGAACGTGGTATCACCATTGATATCTCCTTGTGGAAAT      | 302 |
| AU120002.1 | 152 | .....G.....                                                                                                                                                | 301 |
| CJ434202.1 | 178 | .....T.....G.....                                                                                                                                          | 327 |
| CR976939.1 | 34  | .....                                                                                                                                                      | 183 |
| CB138394.1 | 5   | .....                                                                                                                                                      | 154 |
| GR891610.1 | 145 | ...T...G...T.C...A.....                                                                                                                                    | 294 |
| DC519934.1 | 152 | .....A.....C.....                                                                                                                                          | 301 |
| AU296783.1 | 152 | .....T.....                                                                                                                                                | 301 |
| CD466199.1 | 156 | .G.....G.....C.G.....C.....A.....G.....C.....                                                                                                              | 305 |
| DA429743.1 | 152 | .....                                                                                                                                                      | 302 |
|            |     | \                                                                                                                                                          |     |
|            |     |                                                                                                                                                            |     |
|            |     | N                                                                                                                                                          |     |
| Query      | 303 | TTGAGACCAGCAAGTACTATTGTGACTATTATTGATGCCCCAGGCACACAGAGACTTTATCAAAAACATGATTACAGGGACATCTCAGGTGACTGTGCTGTCTGATTGTGTGCTGCTGGTGTGGTGTCTCTCAAACCCGGTATTGGTGGTCA   | 452 |
| AU120002.1 | 302 | .....-----                                                                                                                                                 | 445 |
| CJ434202.1 | 328 | .....C.....                                                                                                                                                | 471 |
| CR976939.1 | 184 | .....-----                                                                                                                                                 | 327 |
| CB138394.1 | 155 | .....                                                                                                                                                      | 319 |
|            |     |                                                                                                                                                            |     |
| GR891610.1 | 295 | .C.....T..C...C.....C.....TGTTGAATTGAAGC.....C...C.-....G..T.....                                                                                          | 438 |
| DC519934.1 | 302 | .....C.....                                                                                                                                                | 464 |
|            |     |                                                                                                                                                            |     |
| AU296783.1 | 302 | .....C.....TGTTGTTGGAGAC.....                                                                                                                              | 464 |
|            |     |                                                                                                                                                            |     |
| CD466199.1 | 306 | .C.....T.....C.....C.....C.G.....C.....T.....T.....T.....T.....                                                                                            | 449 |
| DA429743.1 | 303 | .....                                                                                                                                                      | 467 |
|            |     | \ \ \                                                                                                                                                      |     |
|            |     | TT GGAGAC                                                                                                                                                  |     |
|            |     | C GCCG                                                                                                                                                     |     |
| Query      | 453 | CCTTTGCTCCAGTCAACGTTACAACGGAAGTAAATCTGTGAAATGCACCATGAAGCTTTAGTGAAGCTCTTCCTGGGACAAATGTGGGCTTCAATGTCAAGAATGTGTCTGTCAAGGATGTTTCGTCGTGGCAACGTTGCTGGTGACA       | 602 |
| AU120002.1 | 446 | .....                                                                                                                                                      | 595 |
| CJ434202.1 | 472 | .....T.....                                                                                                                                                | 621 |
| CR976939.1 | 328 | .....                                                                                                                                                      | 472 |



CB138394.1 320 ..... 469
GR891610.1 439 .....T.....T.....G.....T.....G.....C...A.....A.....T...G..... 588
DC519934.1 465 ..... 594
AU296783.1 465 ..... 594
CD466199.1 450 .....T.....T.....G.....T.....T.....C.....C.....C.....A.....C.....T...G..... 599
AU144980.1 594 ..... 576
DA429743.1 468 ..... 558
Query 603 GCAAAAATGACCCACCAATGGAAGCAGCTGGCTTCACTGCTCAGGTGATTATCCTGAACCATCCAGGCCAAATAAGCGCCGGCTATGCCCTGTATTGGATTGCCACACGGCTCACATTGCATGCAAGTTTGTGAGCTGAAGGAAAAA 752
AU120002.1 596 ..... 745
CJ434202.1 622 .....C.....G.....A...T.....T.....T...T.....GG.....AAT.....TG.....A..... 772
CR976939.1 478 ..... 627
CB138394.1 470 ..... 619
GR891610.1 589 .....A.....C...T...T...A.....A.....GC.....A...T...A.....CC.....A..... 736
CD466199.1 600 .....T.....A.....C...T...T...G.....A.....GC.....T...A.....T... 724
AU144980.1 575 .....N...N...A...N...N...T.....G.....G.....C.....N...T.....G...T.....T..... 419
Query 753 TTGATCGCTGTTTCGTGATATGAGACAGACAGTTGCGGTGGGTGTATCAAAAGCAGTGGACAAGAAGGCTGCTGGAGCTGGCAAGGTCACCAAGTCTGCCAGAAAGCTCAGAAGGCTAAATGAATATTATCCCTAATACCTGCCACCCCA 902
AU120002.1 746 ..... 753
CJ434202.1 773 ..... 779
CR976939.1 628 .....C.... 640
CB138394.1 620 .....C.... 632
AU144980.1 418 ..... 264
Query 903 CTCTTAATCAGTGGTGAAGAACGGTCTCAGAACTGTTTGTTCATTTAGTCTAGTAAAGACTGGTAAATGATAACAATGCATCGTAAACCTTCAGAAGGAAAGGAGAATgttttggaccactttgtttttctt 1052
AU144980.1 263 ..N.....C..... 114
Query 1053 ttttgcgtgtggcagttttaagtattagtttttaaaatcagtactttttaaTGGAACAACCTTGACCAAAAATTTGTACAGAAATTTTGAGACCCATTAAAAAGTTAAAT 1164
AU144980.1 113 ..... 2
Query= T12-29 [organism=Homo sapiens] eef1a1
Length=1240

| Sequences producing significant alignments: |          |                                                                                                                                                          | Score<br>(Bits) | E<br>Value | Max<br>ident |
|---------------------------------------------|----------|----------------------------------------------------------------------------------------------------------------------------------------------------------|-----------------|------------|--------------|
| BY794942.2                                  | BY794942 | Homo sapiens eye Homo sapiens cDNA clone H...                                                                                                            | 2141            | 0.0        | 100%         |
| DC527884.1                                  | DC527884 | chimpanzee skin cDNA library PstA Pan trog...                                                                                                            | 2135            | 0.0        | 100%         |
| BX426149.2                                  | BX426149 | Homo sapiens NEUROBLASTOMA Homo sapiens cD...                                                                                                            | 2091            | 0.0        | 99%          |
| BX418564.2                                  | BX418564 | Homo sapiens FETAL BRAIN Homo sapiens cDNA...                                                                                                            | 2025            | 0.0        | 98%          |
| BX459625.2                                  | BX459625 | Homo sapiens FETAL BRAIN Homo sapiens cDNA...                                                                                                            | 1988            | 0.0        | 98%          |
| BX420340.1                                  | BX420340 | Homo sapiens FETAL BRAIN Homo sapiens cDNA...                                                                                                            | 1984            | 0.0        | 99%          |
| BX440470.1                                  | BX440470 | Homo sapiens FETAL BRAIN Homo sapiens cDNA...                                                                                                            | 1980            | 0.0        | 98%          |
| AL518238.2                                  | AL518238 | Homo sapiens NEUROBLASTOMA Homo sapiens cD...                                                                                                            | 1978            | 0.0        | 97%          |
| AL567209.3                                  | AL567209 | Homo sapiens FETAL BRAIN Homo sapiens cDNA...                                                                                                            | 1975            | 0.0        | 98%          |
| BX418589.2                                  | BX418589 | Homo sapiens FETAL BRAIN Homo sapiens cDNA...                                                                                                            | 1962            | 0.0        | 98%          |
| ALIGNMENTS                                  |          |                                                                                                                                                          |                 |            |              |
| Query                                       | 2        | TTTTTCGCAACGGGTTTTCGCCGCCAGACACAGGTGTCTGTGAAAACCTACCCCTAAAAGCCAAATGGGAAGGAAATTTGTTAAGGAAGTCAGCACTTACATTAGAAAAATTTGGCTACAACCCGACACAGTAGCATTTGTGCCAATTTCTG | 151             |            |              |
| BY794942.2                                  | 570      | .....                                                                                                                                                    | 650             |            |              |
| BY794942.2                                  | 25       | .....                                                                                                                                                    | 80              |            |              |
| DC527884.1                                  | 573      | .....                                                                                                                                                    | 653             |            |              |
| DC527884.1                                  | 9        | .....                                                                                                                                                    | 83              |            |              |
| BX426149.2                                  | 1156     | .....                                                                                                                                                    | 1076            |            |              |
| BX418564.2                                  | 1153     | ..W...-R.....M.....K...-R...-S...-R...-K...                                                                                                              | 1083            |            |              |
| BX459625.2                                  | 1118     | .....C.MCM...C.....K...W...-KS...-K                                                                                                                      | 1076            |            |              |
| BX420340.1                                  | 1117     | .....M..M.....K...M.W...YT                                                                                                                               | 1080            |            |              |
| BX440470.1                                  | 1128     | .....-W...-S.M...Y...-C.....V.M.....                                                                                                                     | 1086            |            |              |
| AL518238.2                                  | 1148     | .....R...-M...-W...M...V.M.....                                                                                                                          | 1081            |            |              |
| AL567209.3                                  | 1125     | .....-K.W.....R...-A.M.C.....C.....                                                                                                                      | 1046            |            |              |
| BX418589.2                                  | 1130     | .....-K...-W...-M...C...M.K...-S...-M                                                                                                                    | 1084            |            |              |

|            |      |                                                                                                                                                         |      |
|------------|------|---------------------------------------------------------------------------------------------------------------------------------------------------------|------|
| Query      | 152  | GT TGAATGGTGACAACATGCTGGAGCCAAGTCTAACATGCCTTGGTCAAGGGATGAAAGTCACCCGTAAGGATGGCAATGCCAGTGAACCAACGCTGCTTGAGGCTCTGGA                                        | 301  |
| BY794942.2 | 651  | .....                                                                                                                                                   | 800  |
| DC527884.1 | 654  | .....                                                                                                                                                   | 803  |
| BX426149.2 | 1075 | .....                                                                                                                                                   | 926  |
| BX418564.2 | 1082 | .....C.....                                                                                                                                             | 936  |
| BX459625.2 | 1075 | .....W.....K.A.....                                                                                                                                     | 925  |
|            |      | <br>T                                                                                                                                                   |      |
| BX420340.1 | 1079 | ...D...K...T...Y.....A.....R.....                                                                                                                       | 931  |
| BX440470.1 | 1085 | ..K.....K.....R.....                                                                                                                                    | 938  |
| AL518238.2 | 1080 | -K.....A.....A.....W.....R.....                                                                                                                         | 931  |
|            |      | <br>A                                                                                                                                                   |      |
| AL567209.3 | 1045 | .....K.....                                                                                                                                             | 896  |
| BX418589.2 | 1083 | .....-KK.....K.C.....                                                                                                                                   | 937  |
| Query      | 302  | CCTTGCCTGCCTCTCCAGGATGCTACAAAAATTGGTGGTATTGGTACTGTTCTGTGGCCGAGTGGAGACTGGTGTCTCAAAACCCGGTATGGTGGTCACTTTGCTCCAGTCAACGTTACACCGGAAGTAAAACTCTGTGAAATGC       | 451  |
| BY794942.2 | 801  | .....                                                                                                                                                   | 950  |
| DC527884.1 | 804  | .....                                                                                                                                                   | 953  |
| BX426149.2 | 925  | .....                                                                                                                                                   | 776  |
| BX418564.2 | 935  | ..C.....                                                                                                                                                | 786  |
| BX459625.2 | 924  | .....                                                                                                                                                   | 775  |
| BX420340.1 | 930  | .....                                                                                                                                                   | 781  |
| BX440470.1 | 937  | .....                                                                                                                                                   | 788  |
| AL518238.2 | 930  | .....W.....B.....W.....                                                                                                                                 | 781  |
| AL567209.3 | 895  | .....                                                                                                                                                   | 746  |
| BX418589.2 | 936  | .....                                                                                                                                                   | 787  |
| Query      | 452  | ACCATGAAGCTTTGAGTGAAGCTCTTCTGGGGACAATGTGGGCTTCAATGTCAAGAAATGTGTCTGTCAAGGATGTTCTGTCGTGGCAACGTTGCTGGTGACAGCAAAAATGACCCACCAATGGAAGCAGCTGGCTTCACTGCTCAGGTGA | 601  |
| BY794942.2 | 951  | .....                                                                                                                                                   | 1100 |
| DC527884.1 | 954  | .....                                                                                                                                                   | 1103 |
| BX426149.2 | 775  | .....                                                                                                                                                   | 626  |
| BX418564.2 | 785  | .....C.....                                                                                                                                             | 636  |
| BX459625.2 | 774  | .....                                                                                                                                                   | 625  |
| BX420340.1 | 780  | .....                                                                                                                                                   | 631  |
| BX440470.1 | 787  | .....                                                                                                                                                   | 638  |
| AL518238.2 | 780  | .....A.....G.....                                                                                                                                       | 631  |
| AL567209.3 | 745  | .....                                                                                                                                                   | 597  |
| BX418589.2 | 786  | .....                                                                                                                                                   | 637  |
| Query      | 602  | TTATCCTGAACCATCCAGGCCAAATAAGCGCCGGCTATGCCCTGTATTGGATTGCCACACGGCTCACATTGCATGCAAGTTTGCTGAGCTGAAGGAAAGATTGATCGCCGTTCTGGTAAAAGCTGGAAGATGGCCCTAAATTCCTTGA    | 751  |
| BY794942.2 | 1101 | .....                                                                                                                                                   | 1251 |
|            |      | <br>G                                                                                                                                                   |      |
| DC527884.1 | 1104 | .....                                                                                                                                                   | 1253 |
| BX426149.2 | 625  | .....                                                                                                                                                   | 476  |
| BX418564.2 | 635  | .....M.....                                                                                                                                             | 486  |
| BX459625.2 | 624  | .....                                                                                                                                                   | 475  |
| BX420340.1 | 630  | .....                                                                                                                                                   | 481  |
| BX440470.1 | 637  | .....                                                                                                                                                   | 487  |
|            |      | <br>C                                                                                                                                                   |      |
| AL518238.2 | 630  | .....Y.....                                                                                                                                             | 481  |
| AL567209.3 | 596  | .....                                                                                                                                                   | 447  |
| BX418589.2 | 636  | .....Y.S.....                                                                                                                                           | 487  |
| Query      | 752  | AGTCTGGTGATGCTGCCATTGTTGATATGGTTCCTGGCAAGCCCATGTGTGTTGAGAGCTTCTCAGACTATCCACCTTTGGGTCGCTTTGCTGTTCTGTGATATGAGACAGACAGTTGCGGTGGTTGTCAATCAAGCAGTGGACAAGAAGG | 901  |
| BY794942.2 | 1252 | .....G.....                                                                                                                                             | 1401 |
| DC527884.1 | 1254 | .....G.A.....                                                                                                                                           | 1403 |
| BX426149.2 | 475  | .....G.....                                                                                                                                             | 326  |
| BX418564.2 | 485  | .....G.....                                                                                                                                             | 336  |
| BX459625.2 | 474  | .....G.....                                                                                                                                             | 325  |
| BX420340.1 | 480  | .....G.....                                                                                                                                             | 331  |
| BX440470.1 | 486  | .....G.....                                                                                                                                             | 337  |
| AL518238.2 | 480  | .....G.....                                                                                                                                             | 331  |
| AL567209.3 | 446  | .....K.....                                                                                                                                             | 297  |
| BX418589.2 | 486  | .....G.....                                                                                                                                             | 337  |
| Query      | 902  | CTGCTGGAGCTGGCAAGTCAACCAAGTCTGCCAGAAAGCTCAGAAGGCTAAATGAATATTATCCCTAATACCTGCCACCCCACTCTTAATCAGTGGTGAAGAACGGTCTCAGAACTGTTTGTTCATTTGGCCATTTAAGTTTAGTAG     | 1051 |
| BY794942.2 | 1402 | .....                                                                                                                                                   | 1551 |
| DC527884.1 | 1404 | .....C.....                                                                                                                                             | 1553 |
| BX426149.2 | 325  | .....                                                                                                                                                   | 176  |
| BX418564.2 | 335  | .....                                                                                                                                                   | 186  |
| BX459625.2 | 324  | .....                                                                                                                                                   | 175  |
| BX420340.1 | 330  | .....                                                                                                                                                   | 181  |
| BX440470.1 | 336  | .....                                                                                                                                                   | 187  |
| AL518238.2 | 330  | .....G.....                                                                                                                                             | 181  |

```

AL567209.3 296 .....M.....Y.....\
                                     |
                                     A
BX418589.2 336 .....187
Query      1052 TAAAAGACTGGTTAATGATAACAATGCATCGTAAACCTTCAGAAGGAAAGAGAAATgttttggaccactttggtttcttttttgcgtgtggcagttttaagttattagtttttaaaatcagttacttttaATGGAACAACCTTGAC 1201
BY794942.2 1552 .....1701
DC527884.1 1554 .....1703
BX426149.2 175 .....28
BX418564.2 185 .....36
BX459625.2 174 .....25
BX420340.1 180 .....31
BX440470.1 186 .....37
AL518238.2 180 .....N.....31
AL567209.3 145 .....1
                                     \
                                     |
                                     G
BX418589.2 186 .....37
Query      1202 CAAAAATTTGTCACAGAAATTTTGACCCATTAAAAAAGTT 1240
BY794942.2 1702 .....1742
                                     \
                                     |
                                     GA
DC527884.1 1704 .....1744
                                     \
                                     |
                                     GA
BX426149.2 27  .G.....G-..G.....5
BX418564.2 35  .....M.....1
                                     \
                                     |
                                     A
BX459625.2 24  .....1
BX420340.1 30  .....7
BX440470.1 36  .....1
                                     \
                                     |
                                     GA
AL518238.2 30  .....N.....6
                                     \
                                     |
                                     N
BX418589.2 36  .....D.....1
                                     \
                                     |
                                     GA

```

Query= T13-27 [organism=Homo sapiens] eef1a1

Length=1489

| Sequences producing significant alignments: |                    |                                               | Score<br>(Bits) | E<br>Value | Max<br>ident |
|---------------------------------------------|--------------------|-----------------------------------------------|-----------------|------------|--------------|
| DC527884.1                                  | DC527884           | chimpanzee skin cDNA library PstA Pan trog... | 2163            | 0.0        | 100%         |
| BY794942.2                                  | BY794942           | Homo sapiens eye Homo sapiens cDNA clone H... | 2134            | 0.0        | 100%         |
| BX426150.2                                  | BX426150           | Homo sapiens NEUROBLASTOMA Homo sapiens cD... | 2037            | 0.0        | 99%          |
| BU902062.1                                  | AGENCOURT_10127553 | NIH MGC 71 Homo sapiens cDNA clo...           | 1997            | 0.0        | 98%          |
| BX402801.2                                  | BX402801           | Homo sapiens T CELLS (JURKAT CELL LINE) CO... | 1988            | 0.0        | 98%          |
| BX402793.2                                  | BX402793           | Homo sapiens T CELLS (JURKAT CELL LINE) CO... | 1973            | 0.0        | 98%          |
| BX440468.2                                  | BX440468           | Homo sapiens FETAL BRAIN Homo sapiens cDNA... | 1971            | 0.0        | 98%          |
| AL513590.3                                  | AL513590           | Homo sapiens PLACENTA Homo sapiens cDNA cl... | 1967            | 0.0        | 97%          |
| AL513664.3                                  | AL513664           | Homo sapiens NEUROBLASTOMA Homo sapiens cD... | 1962            | 0.0        | 98%          |
| AL560156.3                                  | AL560156           | Homo sapiens B CELLS (RAMOS CELL LINE) Hom... | 1960            | 0.0        | 98%          |

#### ALIGNMENTS

|            |    |                                                                                                                                                     |     |
|------------|----|-----------------------------------------------------------------------------------------------------------------------------------------------------|-----|
| Query      | 2  | TTTTTCGCAACGGGTTTGCCGCCAGACAGGTTGTCGTGAAAACCTACCCCTAAAAGCCAAAATGGGAAGGAAAGACTCATATCAACATTGTCGTCATTGGACACGTAGATTCGGGCAAGTCCACCACTACTGGCCATCTGATCTATA | 151 |
| DC527884.1 | 9  | .....                                                                                                                                               | 158 |
| BY794942.2 | 25 | .....                                                                                                                                               | 155 |
| BX426150.2 | 1  | .....T.....                                                                                                                                         | 126 |
| BU902062.1 | 1  | .....                                                                                                                                               | 137 |
| BX402801.2 | 1  | .....A.....                                                                                                                                         | 140 |
| BX402793.2 | 6  | .....                                                                                                                                               | 139 |
| BX440468.2 | 1  | .....                                                                                                                                               | 130 |
| AL513590.3 | 2  | .....\                                                                                                                                              | 123 |

|            |     | C                                                                                                                                                       |                                                                         |      |
|------------|-----|---------------------------------------------------------------------------------------------------------------------------------------------------------|-------------------------------------------------------------------------|------|
| AL513664.3 | 1   |                                                                                                                                                         |                                                                         | 130  |
| AL560156.3 | 1   |                                                                                                                                                         |                                                                         | 112  |
| Query      | 152 | AATGCGGTGGCATCGACAAAGAACCATTGAAAAATTGAGAAGGAGGCTGCTGAGATGGGAAAGGGCTCCTTCAAGTATGCCTGGGTCTTGGATAAACTGAAAGCTGAGCGTGAACGTGGTATCACCATTGATATCTCTTGTGGAAT      |                                                                         | 301  |
| DC527884.1 | 159 |                                                                                                                                                         | T                                                                       | 308  |
| BY794942.2 | 156 |                                                                                                                                                         |                                                                         | 305  |
| BX426150.2 | 127 |                                                                                                                                                         |                                                                         | 276  |
| BU902062.1 | 138 |                                                                                                                                                         |                                                                         | 287  |
| BX402801.2 | 141 |                                                                                                                                                         |                                                                         | 290  |
| BX402793.2 | 140 |                                                                                                                                                         |                                                                         | 289  |
| BX440468.2 | 131 |                                                                                                                                                         |                                                                         | 283  |
| AL513590.3 | 124 |                                                                                                                                                         |                                                                         | 273  |
| AL513664.3 | 131 |                                                                                                                                                         | B                                                                       | 280  |
| AL560156.3 | 113 |                                                                                                                                                         | Y                                                                       | 267  |
| Query      | 302 | TTGAGACCAGCAAGTACTATGTGACTATCATTGATGCCCGCAGGACACAGAGACTTATCAAAAACATGATTACAGGGACATCTCAGGCTGACTGTGCTGCTCTGCTGATTGTTGCTGCTGGTGTGGTGAATTTGAAGCTGGTATCTCCAGA |                                                                         | 451  |
| DC527884.1 | 309 |                                                                                                                                                         | C                                                                       | 458  |
| BY794942.2 | 306 |                                                                                                                                                         |                                                                         | 455  |
| BX426150.2 | 277 |                                                                                                                                                         |                                                                         | 426  |
| BU902062.1 | 288 |                                                                                                                                                         |                                                                         | 437  |
| BX402801.2 | 291 |                                                                                                                                                         |                                                                         | 440  |
| BX402793.2 | 290 |                                                                                                                                                         |                                                                         | 439  |
| BX440468.2 | 281 |                                                                                                                                                         |                                                                         | 430  |
| AL513590.3 | 274 |                                                                                                                                                         |                                                                         | 423  |
| AL513664.3 | 281 |                                                                                                                                                         | K . B . B . K                                                           | 430  |
| AL560156.3 | 263 |                                                                                                                                                         | B . Y                                                                   | 412  |
| Query      | 452 | ATGGGCAGACCCGAGAGCATGCCCTTCTGGCTTACACACTGGGTGTGAACAACATTAATGTTCGGTGTAAACAAATGGATTCCACTGAGCCACCCTACAGCCAGAAGAGATATGAGGAAATTTGTTAAGGAAGTCAGCACTTACATTAGA  |                                                                         | 601  |
| DC527884.1 | 459 |                                                                                                                                                         |                                                                         | 608  |
| BY794942.2 | 456 |                                                                                                                                                         |                                                                         | 605  |
| BX426150.2 | 427 |                                                                                                                                                         |                                                                         | 576  |
| BU902062.1 | 438 |                                                                                                                                                         |                                                                         | 587  |
| BX402801.2 | 441 |                                                                                                                                                         |                                                                         | 590  |
| BX402793.2 | 440 |                                                                                                                                                         |                                                                         | 589  |
| BX440468.2 | 431 |                                                                                                                                                         |                                                                         | 580  |
| AL513590.3 | 424 |                                                                                                                                                         |                                                                         | 573  |
| AL513664.3 | 421 |                                                                                                                                                         |                                                                         | 580  |
| AL560156.3 | 413 |                                                                                                                                                         |                                                                         | 562  |
| Query      | 602 | AAATTGGCTACAACCCCGACACAGTAGCAATTTGTGCCAATTTCTGGTTGGAATGGTGACAACATGCTGGAGCCAAGTGCTAACATGCCTTGGTTCAGGGATGGAAGTCACCCGTAAGGATGGCAATGCCATGGAAACACGCTGCTTG    |                                                                         | 757  |
| DC527884.1 | 609 |                                                                                                                                                         |                                                                         | 758  |
| BY794942.2 | 606 |                                                                                                                                                         |                                                                         | 755  |
| BX426150.2 | 577 |                                                                                                                                                         |                                                                         | 726  |
| BU902062.1 | 588 |                                                                                                                                                         |                                                                         | 737  |
| BX402801.2 | 591 |                                                                                                                                                         |                                                                         | 740  |
| BX402793.2 | 590 |                                                                                                                                                         |                                                                         | 739  |
| BX440468.2 | 581 |                                                                                                                                                         |                                                                         | 729  |
| AL513590.3 | 574 |                                                                                                                                                         | Y . . . Y . . . - . . . T . . .                                         | 722  |
| AL513664.3 | 581 |                                                                                                                                                         |                                                                         | 730  |
| AL560156.3 | 563 |                                                                                                                                                         |                                                                         | 712  |
| Query      | 752 | AGGCTCTGGACTGCATCTACCACCAACTCGTCCAACATGACAAGCCCTTGGCGCTGCCTCTCCAGGATGTCTACAAAATTGGTGGTATTGGTACTGTTCCTGTTGGCCGAGTGGAGACTGGTGTCTCAAACCCGGTATGGTGGTCACTT   |                                                                         | 901  |
| DC527884.1 | 759 |                                                                                                                                                         |                                                                         | 908  |
| BY794942.2 | 756 |                                                                                                                                                         |                                                                         | 905  |
| BX426150.2 | 727 |                                                                                                                                                         |                                                                         | 878  |
| BU902062.1 | 738 |                                                                                                                                                         |                                                                         | 887  |
| BX402801.2 | 741 |                                                                                                                                                         |                                                                         | 890  |
| BX402793.2 | 740 |                                                                                                                                                         |                                                                         | 889  |
| BX440468.2 | 730 |                                                                                                                                                         |                                                                         | 879  |
| AL513590.3 | 723 |                                                                                                                                                         |                                                                         | 872  |
| AL513664.3 | 731 |                                                                                                                                                         | Y . . . . .                                                             | 880  |
| AL560156.3 | 713 |                                                                                                                                                         |                                                                         | 862  |
| Query      | 902 | TTGCTCCAGTCAACGTTACAACGGAAGTAAAACTGTGGAATGCACCATGAAGCTTTGAGTGAAGCTCTTCTGGGACAATGTGGGCTTCAATGTCAAGAATGTGCTGCTCAAGGATGTTCTGCTGGCAACGTTGCTGGTGACAGCA       |                                                                         | 1051 |
| DC527884.1 | 909 |                                                                                                                                                         |                                                                         | 1058 |
| BY794942.2 | 906 |                                                                                                                                                         |                                                                         | 1055 |
| BX426150.2 | 877 |                                                                                                                                                         |                                                                         | 1025 |
| BU902062.1 | 888 |                                                                                                                                                         | AC . . . . C . . . C . . .                                              | 1037 |
| BX402801.2 | 891 |                                                                                                                                                         | W . . . . Y . . . . Y . . . T . . . K . T . A . . . M . K . . . S . .   | 1042 |
| BX402793.2 | 890 |                                                                                                                                                         | S . . . . - . . . . G . . . TM . A . . . . K . . .                      | 1038 |
| BX440468.2 | 880 |                                                                                                                                                         | T . . . . T . . . Y . . . R . . . M . . . T . . . M - . . . S - . .     | 1027 |
| AL513590.3 | 873 |                                                                                                                                                         | T . . . . T . . . Y . . . R . . . M . . . T . . . M . . . - . . . C . . | 1027 |

AL513664.3 881 .....T.....W.....K.....A.....K.T.....G.....GC.....S.- 1030

AL560156.3 863 .....S. 1013

Query 1052 AAAANTGACCCCAATGGAAGCAGCTGGCTTCAGTGCCTCAGGTGATTATCCTGAACCATCCAGGCCAAATAAGCGCCGGCTATGCCCTGTATTGGATTGCCACACGGCTCACATTGCATGCAAGTCTGCCAGAAAGCTCAGAAGGCTA 1201

DC527884.1 1059 .....T... 1188

DC527884.1 1426 ..... 1454

BY794942.2 1056 .....T... 1186

BY794942.2 1424 ..... 1452

BX426150.2 1026 ..... 1140

BU902062.1 1038 .....C..G..T... 1162

BX402801.2 1043 ...W...A.....K.Y.....T..W.....W...S.S-...K.W..... 1144

BX402793.2 1039 ...WKR...M-.....M...Y.....M.M-...M...M-...S... 1121

BX440468.2 1028 .....M.....M.....M(C..R-...A.M-...S...Y-... 1120

AL513590.3 1022 .....Y.....K.C.....W.....M.M-...T...T...M.Y..S.Y.A.....T... 1151

AL513664.3 1031 .....G.....Y.....W.M.....WR.....S.SY-...T..... 1127

AL560156.3 1014 .....K.R.....Y.....W...K..M.M.....W-...Y-... 1103

Query 1202 AATGAATATTATCCCTAATACCTGCCACCCCACTCTTAATCAGTGGTGAAGAACGGTCTCAGAACTGTTTGTTCATTGGCCATTTAAGTTTAGTAGTAAAGACTGGTTAATGATAACAATGCATCGTAAACCTTCAGAAGGAAAG 1351

DC527884.1 1455 .....C..... 1604

BY794942.2 1453 ..... 1602

Query 1352 GAGAATgtttgtggaccactttgttttttttgcgtgtggcagttttaagttattagtttttaaaatcagtaacttttaATGGAACAACCTTGACCAAAAATTTGTACAGAATTTTGAGACCCATTAAAAAG 1489

DC527884.1 1605 ..... 1742

BY794942.2 1603 ..... 1740

Query= T14-34 [organism=Homo sapiens] eef1al

Length=1467

| Sequences producing significant alignments: |                                                        | Score<br>(Bits)                                                                                                                                      | E<br>Value | Max<br>ident |
|---------------------------------------------|--------------------------------------------------------|------------------------------------------------------------------------------------------------------------------------------------------------------|------------|--------------|
| BX440539.2                                  | BX440539 Homo sapiens FETAL BRAIN Homo sapiens cDNA... | 1465                                                                                                                                                 | 0.0        | 100%         |
| DR763375.1                                  | HESC4_151_G10.g1_A037 NIH_MGC_262 Homo sapiens cDNA... | 1463                                                                                                                                                 | 0.0        | 100%         |
| DR763172.1                                  | HESC4_149_E01.g1_A037 NIH_MGC_262 Homo sapiens cDNA... | 1463                                                                                                                                                 | 0.0        | 100%         |
| DR762061.1                                  | HESC4_136_A03.g1_A037 NIH_MGC_262 Homo sapiens cDNA... | 1463                                                                                                                                                 | 0.0        | 100%         |
| DR158661.1                                  | HESC2_92_H12.g1_A035 NIH_MGC_258 Homo sapiens cDNA ... | 1463                                                                                                                                                 | 0.0        | 100%         |
| CX870789.1                                  | HESC4_49_D11.g1_A037 NIH_MGC_262 Homo sapiens cDNA ... | 1463                                                                                                                                                 | 0.0        | 100%         |
| BU846433.1                                  | AGENCOURT_10413493 NIH_MGC_109 Homo sapiens cDNA cl... | 1463                                                                                                                                                 | 0.0        | 100%         |
| AU119155.1                                  | AU119155 HEMBA1 Homo sapiens cDNA clone HEMBA100515... | 1463                                                                                                                                                 | 0.0        | 100%         |
| DA738169.1                                  | DA738169 NT2RP4 Homo sapiens cDNA clone NT2RP400261... | 1461                                                                                                                                                 | 0.0        | 100%         |
| DA418936.1                                  | DA418936 CD34C1 Homo sapiens cDNA clone CD34C100001... | 1461                                                                                                                                                 | 0.0        | 100%         |
| ALIGNMENTS                                  |                                                        |                                                                                                                                                      |            |              |
| Query                                       | 1                                                      | CTTTTCGCAACGGGTTTGCCGCCAGAACACAGGTGTCTGGAAGCACTACCCCTAAAAGCCAAATAGGGAAGGAAAGACTCATATCAACATTGTCTGTCATTGGACACGTAGATTGGGCAAGTCCACCACTACTGGCCATCTGATCTAT | 150        |              |
| BX440539.2                                  | 40                                                     | .....                                                                                                                                                | 189        |              |
| DR763375.1                                  | 6                                                      | .....                                                                                                                                                | 154        |              |
| DR763172.1                                  | 3                                                      | .....                                                                                                                                                | 151        |              |
| DR762061.1                                  | 19                                                     | .....                                                                                                                                                | 167        |              |
| DR158661.1                                  | 11                                                     | .....                                                                                                                                                | 159        |              |
| CX870789.1                                  | 7                                                      | .....                                                                                                                                                | 155        |              |
| BU846433.1                                  | 20                                                     | .....                                                                                                                                                | 168        |              |
| AU119155.1                                  | 7                                                      | .....                                                                                                                                                | 155        |              |
| DA738169.1                                  | 4                                                      | .....                                                                                                                                                | 153        |              |
| DA418936.1                                  | 1                                                      | .....                                                                                                                                                | 150        |              |
| Query                                       | 151                                                    | AAATGCGGTGGCATCGACAAAAGAACCTTGAAAAATTTGAGAAGGAGGCTGCTGAGATGGGAAGGGCTCCTTCAAGTATGCCTGGGCTTTGGATAAACTGAAAGCTGAGCGTGACGTGGTATCACCATTGATATCTCCTTGTGGAAA  | 300        |              |
| BX440539.2                                  | 190                                                    | .....                                                                                                                                                | 339        |              |
| DR763375.1                                  | 155                                                    | .....                                                                                                                                                | 304        |              |
| DR763172.1                                  | 152                                                    | .....                                                                                                                                                | 301        |              |
| DR762061.1                                  | 168                                                    | .....                                                                                                                                                | 317        |              |
| DR158661.1                                  | 160                                                    | .....                                                                                                                                                | 309        |              |

|                                                                                                                                                                       |     |             |     |
|-----------------------------------------------------------------------------------------------------------------------------------------------------------------------|-----|-------------|-----|
| CX870789.1                                                                                                                                                            | 156 | .....       | 305 |
| BU846433.1                                                                                                                                                            | 169 | .....       | 318 |
| AU119155.1                                                                                                                                                            | 156 | .....       | 305 |
| DA738169.1                                                                                                                                                            | 154 | .....       | 303 |
| DA418936.1                                                                                                                                                            | 151 | .....       | 300 |
| Query 301 TTTGAGACCAGCAAGTACTATGTGACTATCATTGATGCCCCAGGACACAGAGACTTTATCAAAAACATGATTACAGGGACATCTCAGGCTGACTGTGCTGTCTCTGATTGTTGCTGCTGGTGGTGAATTTGAAGCTGGTATCTCCAAG 450    |     |             |     |
| BX440539.2                                                                                                                                                            | 340 | .....       | 489 |
| DR763375.1                                                                                                                                                            | 305 | .....       | 454 |
| DR763172.1                                                                                                                                                            | 302 | .....       | 451 |
| DR762061.1                                                                                                                                                            | 318 | .....       | 467 |
| DR158661.1                                                                                                                                                            | 310 | .....       | 459 |
| CX870789.1                                                                                                                                                            | 306 | .....       | 455 |
| BU846433.1                                                                                                                                                            | 319 | .....       | 468 |
| AU119155.1                                                                                                                                                            | 306 | .....       | 455 |
| DA738169.1                                                                                                                                                            | 304 | .....       | 453 |
| DA418936.1                                                                                                                                                            | 301 | .....       | 450 |
| Query 451 AATGGGCAGACCCGAGAGCATGCCCTTCTGGCTTACACACTGGGTGTGAACAACATAATTGTCGGTGTAAACAAATGGATTCCACTGAGCCACCTACAGCCAGAAGAGATATGAGGAAATTTGTAAGGAAGTCAGCACTTACATTAAAG 600   |     |             |     |
| BX440539.2                                                                                                                                                            | 490 | .....       | 639 |
| DR763375.1                                                                                                                                                            | 455 | .....       | 604 |
| DR763172.1                                                                                                                                                            | 452 | .....       | 601 |
| DR762061.1                                                                                                                                                            | 468 | .....       | 617 |
| DR158661.1                                                                                                                                                            | 460 | .....       | 609 |
| CX870789.1                                                                                                                                                            | 456 | .....       | 605 |
| BU846433.1                                                                                                                                                            | 469 | .....       | 618 |
| AU119155.1                                                                                                                                                            | 456 | .....       | 605 |
| DA738169.1                                                                                                                                                            | 454 | .....       | 603 |
| DA418936.1                                                                                                                                                            | 451 | .....       | 600 |
| Query 601 AAAATTGGCTACAACCCCGACACAGTAGCATTTGTGCCAATTTCTGGTTGGAATGGTGACAAACATGCTGGAGCCCAAGTGCTAACATGCCCTTGGTTCAAGGGATGGAAGTACCCGTAAAGATGGCAATGCCAGTGGAAACCACGCTGCT 750 |     |             |     |
| BX440539.2                                                                                                                                                            | 640 | .....       | 788 |
| DR763375.1                                                                                                                                                            | 605 | .....       | 753 |
| DR763172.1                                                                                                                                                            | 602 | .....       | 750 |
| DR762061.1                                                                                                                                                            | 618 | .....       | 766 |
| DR158661.1                                                                                                                                                            | 610 | .....       | 758 |
| CX870789.1                                                                                                                                                            | 606 | .....       | 754 |
| BU846433.1                                                                                                                                                            | 619 | .....       | 767 |
| AU119155.1                                                                                                                                                            | 606 | .....       | 754 |
| DA738169.1                                                                                                                                                            | 604 | .....       | 753 |
| <div style="text-align: center;">\</div> <div style="text-align: center;"> </div> <div style="text-align: center;">C</div>                                            |     |             |     |
| DA418936.1                                                                                                                                                            | 601 | .....       | 749 |
| Query 751 TGAGGCTCTGGACTGCACTCTACCACCAACTCGTCCAACCTGACAAGC 797                                                                                                        |     |             |     |
| BX440539.2                                                                                                                                                            | 789 | .....       | 835 |
| DR763375.1                                                                                                                                                            | 754 | .....       | 800 |
| DR763172.1                                                                                                                                                            | 751 | .....       | 797 |
| DR762061.1                                                                                                                                                            | 767 | .....       | 813 |
| DR158661.1                                                                                                                                                            | 759 | .....       | 805 |
| CX870789.1                                                                                                                                                            | 755 | .....       | 801 |
| BU846433.1                                                                                                                                                            | 768 | .....       | 814 |
| AU119155.1                                                                                                                                                            | 755 | .....       | 801 |
| DA738169.1                                                                                                                                                            | 754 | .....       | 800 |
| DA418936.1                                                                                                                                                            | 750 | .....N..... | 796 |

Database: Database of GenBank+EMBL+DDBJ sequences from EST Divisions  
 Posted date: Feb 24, 2019 1:46 AM  
 Number of letters in database: 43,200,890,307  
 Number of sequences in database: 77,566,966

Lambda K H  
 1.33 0.621 1.12  
 Gapped  
 Lambda K H  
 1.28 0.460 0.850  
 Matrix: blastn matrix:1 -2  
 Gap Penalties: Existence: 0, Extension: 0  
 Number of Sequences: 77566966  
 Number of Hits to DB: 11823009  
 Number of extensions: 1013502  
 Number of successful extensions: 1013502  
 Number of sequences better than 10: 34556  
 Number of HSP's better than 10 without gapping: 0  
 Number of HSP's gapped: 528608  
 Number of HSP's successfully gapped: 518797  
 Length of database: 43200890307  
 A: 0  
 X1: 13 (25.0 bits)  
 X2: 32 (59.1 bits)  
 X3: 54 (99.7 bits)

S1: 13 (25.1 bits)

BLASTN 2.9.0+  
Reference: Zheng Zhang, Scott Schwartz, Lukas Wagner, and  
Webb Miller (2000), "A greedy algorithm for aligning DNA  
sequences", J Comput Biol 2000; 7(1-2):203-14.

RID: 8FVG24DZ015

Database: Database of GenBank+EMBL+DDBJ sequences from EST Divisions  
77,566,966 sequences; 43,200,890,307 total letters  
Query= N1-4 [organism=Homo sapiens] eef1a1

Length=1109

| Sequences producing significant alignments: |                    |                                                  |                                  | Score<br>(Bits) | E<br>Value | Max<br>ident |
|---------------------------------------------|--------------------|--------------------------------------------------|----------------------------------|-----------------|------------|--------------|
| CR982215.1                                  | CR982215           | RZPD no.9016                                     | Homo sapiens cDNA clone RZPDp... | 1456            | 0.0        | 100%         |
| BX443032.2                                  | BX443032           | Homo sapiens B CELLS (RAMOS CELL LINE) Hom...    |                                  | 1456            | 0.0        | 100%         |
| BX421307.2                                  | BX421307           | Homo sapiens B CELLS (RAMOS CELL LINE) Hom...    |                                  | 1456            | 0.0        | 100%         |
| BX353545.2                                  | BX353545           | Homo sapiens NEUROBLASTOMA COT 25-NORMALIZ...    |                                  | 1456            | 0.0        | 100%         |
| CX167214.1                                  | HES2               | 49 G11.g1_A035 NIH_MGC_258 Homo sapiens cDNA ... |                                  | 1456            | 0.0        | 100%         |
| CA771972.1                                  | io93j08.x1         | HR85 islet Homo sapiens cDNA clone IMAGE...      |                                  | 1456            | 0.0        | 100%         |
| BU844361.1                                  | AGENCOURT_10414634 | NIH_MGC_109 Homo sapiens cDNA cl...              |                                  | 1456            | 0.0        | 100%         |
| BX453401.2                                  | BX453401           | Homo sapiens T CELLS (JURKAT CELL LINE) Ho...    |                                  | 1454            | 0.0        | 100%         |
| CR996534.1                                  | CR996534           | RZPD no.9017 Homo sapiens cDNA clone RZPDp...    |                                  | 1452            | 0.0        | 100%         |
| BU845975.1                                  | AGENCOURT_10413042 | NIH_MGC_109 Homo sapiens cDNA cl...              |                                  | 1452            | 0.0        | 100%         |

ALIGNMENTS

|            |     |                                                                                                                                                         |     |
|------------|-----|---------------------------------------------------------------------------------------------------------------------------------------------------------|-----|
| Query      | 322 | TTTGAGTGAAGCTCTTCTGGGGACAATGTGGGCTTCAATGTCAAGAATGTGTCGTCTGAAGGATGTTTCGTCTGGCAACGTTGCTGGTGACAGCAAAAATGACCCACCAATGGAAGCAGCTGGGCTTCACTGCTCAGGTGATTATCCTGAA | 471 |
| CR982215.1 | 6   | .....                                                                                                                                                   | 155 |
| BX443032.2 | 143 | .....                                                                                                                                                   | 292 |
| BX421307.2 | 117 | .....                                                                                                                                                   | 266 |
| BX353545.2 | 22  | .....                                                                                                                                                   | 171 |
| CX167214.1 | 788 | .....                                                                                                                                                   | 639 |
| CA771972.1 | 788 | .....                                                                                                                                                   | 639 |
| BU844361.1 | 795 | .....                                                                                                                                                   | 646 |
| BX453401.2 | 17  | .....                                                                                                                                                   | 166 |
| CR996534.1 | 63  | .....                                                                                                                                                   | 212 |
| BU845975.1 | 786 | .....                                                                                                                                                   | 637 |
| Query      | 472 | CCATCCAGGCCAATAAGCGCCGCTATGCCCTGTATTGGATTGCCACACGGCTCACATTGCATGCAGTTTTCGTGAGCTGAAGGAAAGATTGATCGCCGTTCTGGTAAAAAGCTGGAAGATGGCCCTAAATTTCTTGAAGTCTGGTGA     | 621 |
| CR982215.1 | 156 | .....                                                                                                                                                   | 305 |
| BX443032.2 | 293 | .....                                                                                                                                                   | 442 |
| BX421307.2 | 267 | .....                                                                                                                                                   | 416 |
| BX353545.2 | 172 | .....                                                                                                                                                   | 321 |
| CX167214.1 | 638 | .....                                                                                                                                                   | 489 |
| CA771972.1 | 638 | .....                                                                                                                                                   | 489 |
| BU844361.1 | 645 | .....                                                                                                                                                   | 496 |
| BX453401.2 | 167 | .....                                                                                                                                                   | 316 |
| CR996534.1 | 213 | .....                                                                                                                                                   | 362 |
| BU845975.1 | 636 | .....                                                                                                                                                   | 487 |
| Query      | 622 | TGCTGCCATTGTTGATATGGTTCTTGCAAGCCCATGTGTGTTGAGAGCTTCTCAGACTATCCACCTTTTGGGTGCTTTTGCTGTTTCGTGATATGAGACAGACAGTTGCGGTGGGTGTCATCAAGCAGTGGACAGAAGGCTGCTGGAGC   | 771 |
| CR982215.1 | 306 | .....                                                                                                                                                   | 455 |
| BX443032.2 | 443 | .....                                                                                                                                                   | 592 |
| BX421307.2 | 417 | .....                                                                                                                                                   | 566 |
| BX353545.2 | 322 | .....                                                                                                                                                   | 471 |
| CX167214.1 | 488 | .....                                                                                                                                                   | 339 |
| CA771972.1 | 488 | .....                                                                                                                                                   | 339 |
| BU844361.1 | 495 | .....                                                                                                                                                   | 346 |
| BX453401.2 | 317 | .....                                                                                                                                                   | 466 |
| CR996534.1 | 363 | .....                                                                                                                                                   | 512 |
| BU845975.1 | 486 | .....                                                                                                                                                   | 337 |
| Query      | 772 | TGGCAAGGTCACCAAGTCTGCCAGAAAGCTCAGAAGGCTAAATGAATATTATCCCTAATACCTGCCACCCCACTCTTAATCAGTGGTGAAGAACGGTCTCAGAACTGTTTGTTCATTGGCCATTTAAGTTTAGTAGTAAAGACTG       | 921 |
| CR982215.1 | 456 | .....                                                                                                                                                   | 605 |
| BX443032.2 | 593 | .....                                                                                                                                                   | 742 |
| BX421307.2 | 567 | .....                                                                                                                                                   | 716 |
| BX353545.2 | 472 | .....                                                                                                                                                   | 621 |
| CX167214.1 | 338 | .....                                                                                                                                                   | 189 |
| CA771972.1 | 338 | .....                                                                                                                                                   | 189 |
| BU844361.1 | 345 | .....                                                                                                                                                   | 196 |
| BX453401.2 | 467 | .....                                                                                                                                                   | 616 |
| CR996534.1 | 513 | .....                                                                                                                                                   | 662 |
| BU845975.1 | 336 | .....                                                                                                                                                   | 187 |

|            |     |                                                                                                                      |      |
|------------|-----|----------------------------------------------------------------------------------------------------------------------|------|
| Query      | 922 | GTTAATGATAACAATGCATCGTAAACCTTCAGAAGGAAAGGAGAAATgttttggaccactttggttttcttttttgcgtgtggcagttttaagttattagttttttaaatacagta | 1071 |
| CR982215.1 | 606 | .....                                                                                                                | 755  |
| BX443032.2 | 743 | .....                                                                                                                | 892  |
| BX421307.2 | 717 | .....                                                                                                                | 866  |
| BX353545.2 | 622 | .....                                                                                                                | 771  |
| CX167214.1 | 188 | .....                                                                                                                | 39   |
| CA771972.1 | 188 | .....                                                                                                                | 39   |
| BU844361.1 | 195 | .....                                                                                                                | 46   |
| BX453401.2 | 617 | .....                                                                                                                | 766  |
| CR996534.1 | 663 | .....                                                                                                                | 812  |
| BU845975.1 | 186 | .....                                                                                                                | 37   |

|            |      |                                        |      |
|------------|------|----------------------------------------|------|
| Query      | 1072 | TCACAGAAATTTTGAGACCCATTAAAAAGTTAAATGAG | 1109 |
| CR982215.1 | 756  | .....                                  | 793  |
| BX443032.2 | 893  | .....                                  | 930  |
| BX421307.2 | 867  | .....                                  | 904  |
| BX353545.2 | 772  | .....                                  | 809  |
| CX167214.1 | 38   | .....                                  | 1    |
| CA771972.1 | 38   | .....                                  | 1    |
| BU844361.1 | 45   | .....                                  | 8    |
| BX453401.2 | 767  | .....                                  | 803  |
| CR996534.1 | 813  | .....                                  | 848  |
| BU845975.1 | 36   | .....                                  | 1    |

Query= N2-14 [organism=Homo sapiens] eef1a1

Length=987

| Sequences producing significant alignments: |                                                        | Score<br>(Bits) | E<br>Value | Max<br>ident |
|---------------------------------------------|--------------------------------------------------------|-----------------|------------|--------------|
| CN389362.1                                  | 17000599951108 GRN PRENEU Homo sapiens cDNA 5', mRN... | 952             | 0.0        | 100%         |
| CK843266.1                                  | UI-R-AA1-aad-f-05-0-UI.s10 UI-R-AA1 Rattus norvegic... | 948             | 0.0        | 100%         |
| CK843262.1                                  | UI-R-AA1-aad-c-09-0-UI.s10 UI-R-AA1 Rattus norvegic... | 948             | 0.0        | 100%         |
| CK843256.1                                  | UI-R-AA1-aac-g-06-0-UI.s10 UI-R-AA1 Rattus norvegic... | 948             | 0.0        | 100%         |
| CB373762.1                                  | TgESTzyg83g02.x1 TgME49 3 day invitro bradyzoite To... | 948             | 0.0        | 100%         |
| BQ883373.1                                  | AGENCOURT_7982297 Lupski dorsal_root ganglion Homo ... | 948             | 0.0        | 100%         |
| BQ788143.1                                  | il48f10.x1 HR85 islet Homo sapiens cDNA clone IMAGE... | 948             | 0.0        | 100%         |
| BQ787972.1                                  | il45h02.x1 HR85 islet Homo sapiens cDNA clone IMAGE... | 948             | 0.0        | 100%         |
| BQ787616.1                                  | im13c06.x1 Human insulinoma Homo sapiens cDNA clone... | 948             | 0.0        | 100%         |
| BQ787579.1                                  | im12e10.x1 Human insulinoma Homo sapiens cDNA clone... | 948             | 0.0        | 100%         |

#### ALIGNMENTS

|            |     |                                                                                                                                                       |     |
|------------|-----|-------------------------------------------------------------------------------------------------------------------------------------------------------|-----|
| Query      | 467 | GAGAGCATGCCCTAAATTCCTGAAGCTGCTGATGCTGCCATTGTTGATATGGTTCCTGGCAAGCCCATGTGTGTTGAGAGCTTCTCAGACTATCCACCTTTGGGTCGCTTTGCTGTTCTGATATGAGACAGACAGTTGCGGTGGGTGT  | 616 |
| CN389362.1 | 26  | .....<br> <br>G                                                                                                                                       | 175 |
| CK843266.1 | 529 | .....                                                                                                                                                 | 388 |
| CK843262.1 | 529 | .....                                                                                                                                                 | 388 |
| CK843256.1 | 529 | .....                                                                                                                                                 | 388 |
| CB373762.1 | 525 | .....                                                                                                                                                 | 384 |
| BQ883373.1 | 60  | .....                                                                                                                                                 | 201 |
| BQ788143.1 | 514 | .....                                                                                                                                                 | 373 |
| BQ787972.1 | 517 | .....                                                                                                                                                 | 376 |
| BQ787616.1 | 532 | .....                                                                                                                                                 | 391 |
| BQ787579.1 | 528 | .....                                                                                                                                                 | 387 |
| Query      | 617 | CATCAAAAGCAGTGGACAAGAAGGCTGCTGGAGCTGGCAAGGTCACCAAGTCTGCCAGAAAGCTCAGAAGGCTAAATGAATATTATCCCTAATACCTGCCACCCCACTCTTAATCAGTGGTGAAGAACGGTCTCAGAAGCTGTTGTTTC | 766 |
| CN389362.1 | 176 | .....                                                                                                                                                 | 325 |
| CK843266.1 | 387 | .....                                                                                                                                                 | 238 |
| CK843262.1 | 387 | .....                                                                                                                                                 | 238 |
| CK843256.1 | 387 | .....                                                                                                                                                 | 238 |
| CB373762.1 | 383 | .....                                                                                                                                                 | 234 |
| BQ883373.1 | 202 | .....                                                                                                                                                 | 351 |
| BQ788143.1 | 372 | .....                                                                                                                                                 | 223 |
| BQ787972.1 | 375 | .....                                                                                                                                                 | 226 |
| BQ787616.1 | 390 | .....                                                                                                                                                 | 241 |
| BQ787579.1 | 386 | .....                                                                                                                                                 | 237 |
| Query      | 767 | AATTGCCCATTTAAGTTTAGTAGTAAAGACTGGTAAATGATAACAATGCATCGTAAACCTTCAGAAGGAAAGGAGAAATgttttggaccactttggttttcttttttgcgtgtggcagttttaagttattagttttttaaatacagta  | 916 |
| CN389362.1 | 326 | .....                                                                                                                                                 | 475 |
| CK843266.1 | 237 | .....                                                                                                                                                 | 88  |
| CK843262.1 | 237 | .....                                                                                                                                                 | 88  |
| CK843256.1 | 237 | .....                                                                                                                                                 | 88  |
| CB373762.1 | 233 | .....                                                                                                                                                 | 84  |
| BQ883373.1 | 352 | .....                                                                                                                                                 | 501 |
| BQ788143.1 | 222 | .....                                                                                                                                                 | 73  |
| BQ787972.1 | 225 | .....                                                                                                                                                 | 76  |
| BQ787616.1 | 240 | .....                                                                                                                                                 | 91  |



B0787579.1 236 ..... 87

Query= N3-8 [organism=Homo sapiens] eef1a1

| Sequences producing significant alignments: |                                                         | Score<br>(Bits) | E<br>Value | Max<br>ident |
|---------------------------------------------|---------------------------------------------------------|-----------------|------------|--------------|
| DC635691.1                                  | DC635691 macaque bone marrow cDNA library Qbma Maca...  | 1504            | 0.00       | 96%          |
| U1679280.1                                  | tt2f06.xl NC1_CGAP_Gas4 Homo sapiens cDNA clone IM...   | 1077            | 0.00       | 99%          |
| CA431918.1                                  | UI-H-F070-bhl-c-18-0-UI.xl NC1_CGAP_F70 Homo sapiens... | 1075            | 0.00       | 99%          |
| BU070293.1                                  | iml1n9.xl Human insulinoma Homo sapiens cDNA clone...   | 1075            | 0.00       | 99%          |
| AI588866.1                                  | tq2e03.xl NC1_CGAP_UT1 Homo sapiens cDNA clone IMA...   | 1075            | 0.00       | 99%          |
| AI554314.1                                  | tq05f11.xl NC1_CGAP_UT1 Homo sapiens cDNA clone IMA...  | 1075            | 0.00       | 99%          |
| AI36170.1                                   | AI36170.1 ScAes fetal lung NHRI9W Homo sapiens cDNA...  | 1075            | 0.00       | 99%          |
| CT005089.1                                  | CT005089 ZRPD. 9017 Homo sapiens cDNA clone ZRPDp...    | 1074            | 0.00       | 100%         |
| CR999820.1                                  | CR999820 ZRPD. no.9017 Homo sapiens cDNA clone ZRPDp... | 1074            | 0.00       | 100%         |
| CR999128.1                                  | CR999128 ZRPD. no.9017 Homo sapiens cDNA clone ZRPDp... | 1074            | 0.00       | 100%         |

|            |     |                                                                                                                                                            |                                                                                                                                                          |     |
|------------|-----|------------------------------------------------------------------------------------------------------------------------------------------------------------|----------------------------------------------------------------------------------------------------------------------------------------------------------|-----|
| Query      | 1   |                                                                                                                                                            | CTTTTTCGCAACGGGTTTGCCGCCAGAACACAGGTGTCGTGAAAACTACCCCATAAAGCCAAATGGGAAGGAAAAGACTCATATCAACATTGTCTGCATTGGACACCTAGATTTCGGGCAAGTCCACCACCTACTGGCCACCTGATCTAT   | 150 |
| DC635691.1 | 1   |                                                                                                                                                            | -.....-.....T.....C                                                                                                                                      | 149 |
| Query      | 151 |                                                                                                                                                            | AAATGCGGTGGCATCGACAAGAAGACCATTGAAAAATTTGGAAGGAGGCTGCTGAGATGGGAAAGGGCTCCTTCAAGTATTCCTGGGTCTTGGATAAACTGAAAGCTGAGCGTGAACGTGGTATCACCATTGATATCTCCTTGTGGAAA    | 300 |
| DC635691.1 | 150 |                                                                                                                                                            | .....G.....G.....                                                                                                                                        | 299 |
| Query      | 301 |                                                                                                                                                            | TTTGAGACCAGCAAGTACTATGTGACTATCATTGATGCCCCAGGACACATTGCATGCAAGTTTGCTGAGCTGAAGGAAAAGATTGATCGCCGTTCTGGTAAAAAGCTGGAAGATGGCCCTAAAATTC TTGAAGTCTGGTGATGCTGCCATT | 450 |
| DC635691.1 | 300 |                                                                                                                                                            | .....T.....A.....                                                                                                                                        | 467 |
|            |     |                                                                                                                                                            | \\ \\<br>       <br>TG T G T T G G      <br>       <br>T T    <br>   <br>C C A C A C A<br> <br>C                                                         |     |
| AI679280.1 | 604 |                                                                                                                                                            | .....T.....                                                                                                                                              | 481 |
|            |     |                                                                                                                                                            | \<br>            \<br>G          A C C                                                                                                                   |     |
| CA431918.1 | 617 |                                                                                                                                                            | .....A...T.....                                                                                                                                          | 495 |
|            |     |                                                                                                                                                            | \<br>            \<br>G          C C                                                                                                                     |     |
| BU070293.1 | 616 |                                                                                                                                                            | .....A...T.....                                                                                                                                          | 494 |
|            |     |                                                                                                                                                            | \<br>            \<br>T          C C                                                                                                                     |     |
| AI588866.1 | 599 |                                                                                                                                                            | .....T.....                                                                                                                                              | 480 |
|            |     |                                                                                                                                                            | \<br>            \<br>A C C                                                                                                                              |     |
| AI554314.1 | 599 |                                                                                                                                                            | .....A...T.....                                                                                                                                          | 477 |
|            |     |                                                                                                                                                            | \<br>            \<br>G          C C                                                                                                                     |     |
| AI336170.1 | 604 |                                                                                                                                                            | .....A...T.....                                                                                                                                          | 482 |
|            |     |                                                                                                                                                            | \<br>            \<br>G          C C                                                                                                                     |     |
| CT005089.1 | 94  |                                                                                                                                                            | .....                                                                                                                                                    | 198 |
| CR999820.1 | 52  |                                                                                                                                                            | .....                                                                                                                                                    | 156 |
| CR999128.1 | 166 |                                                                                                                                                            | .....                                                                                                                                                    | 270 |
| Query      | 451 | GTTGATATGGTTCCTGGCAAGCCCATGTGTTGTTGAGAGCTTCTCAGACTATCCACCTTTGGGTGCGCTTTGCTGTTTCGTGATATGAGACAGACAGITTCGGTGGGTGTCATCAAAGCAGTGGACAAGAGAGGCTGCTGGAGCTGGCAAGGTC | 600                                                                                                                                                      |     |
| DC635691.1 | 468 | .....T.....G.....                                                                                                                                          | 617                                                                                                                                                      |     |

|            |     |                                                                                                                                                         |     |
|------------|-----|---------------------------------------------------------------------------------------------------------------------------------------------------------|-----|
| Query      | 751 | CAAAATGCATCGTAAAAACCTTCAGAGAGAAAGGAGATgttttggcgacacttggtttttcttttttgcgtgtgcgagttttaagtattatgatttttaaaatcagtaacttttaATGGAAACACACGACACAAAAATTTGTACACAGATT | 900 |
| DC35691.1  | 768 | .....                                                                                                                                                   | 911 |
| AI679280.1 | 180 | .....                                                                                                                                                   | 31  |
| CA431918.1 | 194 | .....                                                                                                                                                   | 45  |
| BU070293.1 | 193 | .....                                                                                                                                                   | 44  |
| AI588866.1 | 179 | .....                                                                                                                                                   | 30  |
| AI554314.1 | 176 | .....                                                                                                                                                   | 27  |
| AI365190.1 | 181 | .....                                                                                                                                                   | 32  |
| CT005089.1 | 499 | .....                                                                                                                                                   | 648 |
| CR999820.1 | 457 | .....                                                                                                                                                   | 606 |
| CR999128.1 | 571 | .....                                                                                                                                                   | 720 |

Query= N4-1 [organism=Homo sapiens] eef1a1

| Sequences producing significant alignments: |                  |                                                 |      | Score<br>(Bits) | E<br>Value | Max<br>ident |
|---------------------------------------------|------------------|-------------------------------------------------|------|-----------------|------------|--------------|
| DC527884.1                                  | DC527884         | chimpanzee skin cDNA library PstA Pan trog...   | 3184 | 0.0             | 100%       |              |
| BY794942.2                                  | BY794942         | Homo sapiens eye Homo sapiens cDNA clone H...   | 3166 | 0.0             | 100%       |              |
| CF111220.1                                  | Shultzomica04471 | Rat lung airway and parenchyma cDN...           | 2357 | 0.0             | 91%        |              |
| BX426149.2                                  | BX426149         | Homo sapiens NEUROBLASTOMA Homo sapiens cD...   | 2146 | 0.0             | 99%        |              |
| CO001006.1                                  | OC028            | pre-estrum adult sheep ovary library Ovis ar... | 2047 | 0.0             | 93%        |              |
| BX418564.2                                  | BX418564         | Homo sapiens FETAL BRAIN Homo sapiens cDNA...   | 2037 | 0.0             | 97%        |              |
| BX426150                                    | BX426150         | Homo sapiens FETAL BRAIN Homo sapiens cD...     | 2037 | 0.0             | 99%        |              |
| AL567209.3                                  | AL567209         | Homo sapiens FETAL BRAIN Homo sapiens cDNA...   | 2037 | 0.0             | 98%        |              |
| BX440407.1                                  | BX440407         | Homo sapiens FETAL BRAIN Homo sapiens cDNA...   | 1999 | 0.0             | 98%        |              |
| BU902062.1                                  | AGENCOCURT       | 10127553 NIH MGC 71 Homo sapiens cDNA clo...    | 1999 | 0.0             | 98%        |              |

[illegible]

[illegible]

```

BX440470.1 685 .....535
                                     \
                                     |
                                     C
BU902062.1 1035 .....1163
               \
               |
               C
               \
               |
               G
               \
               |
               T
               \
               |
               A
               \
               |
               A
Query      1380 TTGATCGCGGTTCTGGTAAAAAGCTGGAAGATGGCCCTAAATCTTGAAGTCTGGTGATGCTGCCATTGTTGATATGGTTCCTGGCAAGCCCATGTGTGTTGAGAGCTTCTCAGACTATCCACCTTTGGGTCGCTTTGCTGTTCTGTGATA 1529
DC527884.1 1206 .....1355
BY794942.2 1204 .....1353
CF111220.1 1199 .C...T.....G.....C.....C.....C.....A.....T.....C..T..AC.T...T.....C. 1348
BX426149.2 523 .....374
CO001006.1 569 .....T.....G.....A.....C.....C.....T.....C.....T..T..T...T..C.....C..T.....G.....C. 420
BX418564.2 533 .....384
AL567209.3 494 .....345
BX440470.1 534 .....385
Query      1530 TGAGACGACAGTTGCGGTGGGTGTCATCAAGCAGTGGACAAGAAGGCTGCTGGAGCTGGCAAGGTACCAAGTCTGCCAGAAAGCTCAGAAGGCTAAATGAATATTTATCCCTAATACCTGCCACCCCACTCTTAATCAGTGGTGGAA 1679
DC527884.1 1356 .....1505
BY794942.2 1354 .....1503
CF111220.1 1349 ...G.....T.....C.....A.....A.....C.....G.....G..... 1498
BX426149.2 373 .....224
CO001006.1 419 .....C..T.....A.....C.....G..... 270
BX418564.2 383 .....234
AL567209.3 344 .....M.....Y.....194
                                     \
                                     |
                                     A
BX440470.1 384 .....235
Query      1680 GAACGGTCTCAGAACTGTTTGTTCAAATTGGCCATTTAAGTTTAGTAGTAAAGACTGGTTAATGATAACAATGCATCGTAAACCTTCAGAAGGAAAGGAGATgttttgggaccactttggttttcttttttgcgtgtggcagtttt 1829
DC527884.1 1506 .....1655
BY794942.2 1504 .....1653
CF111220.1 1499 .....C.....A.....---.....G..... 1637
BX426149.2 223 .....74
CO001006.1 269 .....C.....A.....-A...-G----- 129
                                     \
                                     |
                                     T
BX418564.2 233 .....84
AL567209.3 193 .....43
                                     \
                                     |
                                     G
BX440470.1 234 .....85
Query      1830 aagttattagtttttaaaatcagttactttttaATGGAAACAACCTTGACCAAAAATTTGTACAGAAATTTTGAGACCCATTAAAAAAGTT 1918
DC527884.1 1656 .....1744
BY794942.2 1654 .....1742
CF111220.1 1638 .....C.....-.....C.....-.....1726
                                     \
                                     |
                                     C
BX426149.2 73 .....1
CO001006.1 128 .....A.....C.....-.....40
                                     \
                                     |
                                     A
BX418564.2 83 .....M.....1
AL567209.3 42 .....1
BX440470.1 84 .....1

```

Query= N5-2 [organism=Homo sapiens] eef1al  
Length=1718

| Sequences producing significant alignments: |                  |                                               | Score<br>(Bits) | E<br>Value | Max<br>ident |
|---------------------------------------------|------------------|-----------------------------------------------|-----------------|------------|--------------|
| DC527884.1                                  | DC527884         | chimpanzee skin cDNA library PstA Pan trog... | 3011            | 0.0        | 98%          |
| BY794942.2                                  | BY794942         | Homo sapiens eye Homo sapiens cDNA clone H... | 2992            | 0.0        | 98%          |
| CF111220.1                                  | Shultzomica04471 | Rat lung airway and parenchyma cDN...         | 2206            | 0.0        | 90%          |
| BX426149.2                                  | BX426149         | Homo sapiens NEUROBLASTOMA Homo sapiens cD... | 2146            | 0.0        | 99%          |
| BX418564.2                                  | BX418564         | Homo sapiens FETAL BRAIN Homo sapiens cDNA... | 2047            | 0.0        | 97%          |
| AL567209.3                                  | AL567209         | Homo sapiens FETAL BRAIN Homo sapiens cDNA... | 2001            | 0.0        | 98%          |
| BX440470.1                                  | BX440470         | Homo sapiens FETAL BRAIN Homo sapiens cDNA... | 1999            | 0.0        | 98%          |
| BX420340.1                                  | BX420340         | Homo sapiens FETAL BRAIN Homo sapiens cDNA... | 1997            | 0.0        | 99%          |
| AL518238.2                                  | AL518238         | Homo sapiens NEUROBLASTOMA Homo sapiens cD... | 1993            | 0.0        | 98%          |
| BX459625.2                                  | BX459625         | Homo sapiens FETAL BRAIN Homo sapiens cDNA... | 1993            | 0.0        | 99%          |

[illegible]

|            |      |                                                                                                                                                         |      |
|------------|------|---------------------------------------------------------------------------------------------------------------------------------------------------------|------|
| BX459625.2 | 1094 | ....W....-KS.....-K.....W.....K.A.....                                                                                                                  | 946  |
|            |      | <div> <div> <div></div> <div></div> <div>T</div> </div> </div>                                                                                          |      |
| Query      | 752  | CAACTCGTCCAACCTGACAAGCCCTTGGCGCTGCCTCTCCAGGATGTCTACAAAAATGGTGGTATTGGTACTGTTCTCTGGCCGAGTGGAGACTGGTGTCTCAAACCCGGTATGGTGGTCACCTTTGCTCCAGTCAACGTTACAACGG    | 901  |
| DC527884.1 | 783  | .....                                                                                                                                                   | 932  |
| BY794942.2 | 780  | .....                                                                                                                                                   | 929  |
| CF111220.1 | 776  | .....TC..A...C.....T...C..C...C...C...G.....A.....T.....T.....T..A...T..                                                                                | 925  |
| BX426149.2 | 946  | .....                                                                                                                                                   | 797  |
| BX418564.2 | 956  | .....C.....                                                                                                                                             | 807  |
| AL567209.3 | 916  | .....                                                                                                                                                   | 767  |
| BX440470.1 | 958  | .....                                                                                                                                                   | 809  |
| BX420340.1 | 951  | .....R.....                                                                                                                                             | 802  |
| AL518238.2 | 951  | .....W.....B.....                                                                                                                                       | 802  |
| BX459625.2 | 945  | .....                                                                                                                                                   | 796  |
| Query      | 902  | AAGTAAATCTGTCGAAATGACCATTGAAGCTTTGAGTGAAGCTCTCCTGGGACAAATGTTGGCTTCAATGTCAAGAATGTGTCTGTCAAGGATGTTCTGTCGTGGCAACGTTGCTGGTGACAGCAAAATGACCCACCAATGGAAGCAG    | 1051 |
| DC527884.1 | 933  | .....                                                                                                                                                   | 1082 |
| BY794942.2 | 930  | .....                                                                                                                                                   | 1079 |
| CF111220.1 | 926  | .....C..G...G.....G.....A.....C..A...C.....A..C...A.A.....T.....G.....                                                                                  | 1075 |
| BX426149.2 | 796  | .....                                                                                                                                                   | 647  |
| BX418564.2 | 806  | .....C.....                                                                                                                                             | 657  |
| AL567209.3 | 766  | .....                                                                                                                                                   | 618  |
| BX440470.1 | 808  | .....                                                                                                                                                   | 659  |
| BX420340.1 | 801  | .....                                                                                                                                                   | 652  |
| AL518238.2 | 801  | .....W.....A.....                                                                                                                                       | 652  |
| BX459625.2 | 795  | .....                                                                                                                                                   | 646  |
| Query      | 1052 | CTGGCTTCACGTCTCAGGTGATTATCCTGAACCATCCAGGCCAAATAAGCGCCGGCTATGCCCTGTATTGGATTGCCACACGGCTCACATTGCATGCAAGTTTGCTGAGCTGAAGGAAAAGATTGATCGCCGTTCTGGTAAAAAGCTGGS  | 1201 |
| DC527884.1 | 1083 | .....                                                                                                                                                   | 1232 |
| BY794942.2 | 1080 | .....                                                                                                                                                   | 1230 |
|            |      | <div> <div> <div></div> <div></div> <div>G</div> </div> </div>                                                                                          |      |
| CF111220.1 | 1076 | .....G..C...T..T.....TC...C.....C...A.....C...T..A..G...C...T.....G.....                                                                                | 1225 |
| BX426149.2 | 646  | .....                                                                                                                                                   | 497  |
| BX418564.2 | 656  | .....                                                                                                                                                   | 507  |
| AL567209.3 | 617  | .....                                                                                                                                                   | 468  |
| BX440470.1 | 658  | .....                                                                                                                                                   | 508  |
|            |      | <div> <div> <div></div> <div></div> <div>C</div> </div> </div>                                                                                          |      |
| BX420340.1 | 651  | .....                                                                                                                                                   | 502  |
| AL518238.2 | 651  | .....Y.....                                                                                                                                             | 502  |
| BX459625.2 | 645  | .....                                                                                                                                                   | 496  |
| Query      | 1202 | AAGATGGCCCTAAATCTTTGAAGTCTGGTGATGCTGCCATTGTTGATATGGTTCCTGGCAAGCCCATGTGTGTTGAGAGCTTCTCAGACTATCCACCTTTGGGTGCTTTTGCTGTTCTGTGATATGAGACAGACAGTTGCGGTGGGTGTCA | 1351 |
| DC527884.1 | 1233 | .....                                                                                                                                                   | 1382 |
| BY794942.2 | 1231 | .....                                                                                                                                                   | 1380 |
| CF111220.1 | 1226 | .....C.....C.....C.....A.....T...C...T..AC.T...T.....C...G.....T.....                                                                                   | 1375 |
| BX426149.2 | 496  | .....                                                                                                                                                   | 347  |
| BX418564.2 | 506  | .....                                                                                                                                                   | 357  |
| AL567209.3 | 467  | .....K.....                                                                                                                                             | 318  |
| BX440470.1 | 507  | .....                                                                                                                                                   | 358  |
| BX420340.1 | 501  | .....                                                                                                                                                   | 352  |
| AL518238.2 | 501  | .....                                                                                                                                                   | 352  |
| BX459625.2 | 495  | .....                                                                                                                                                   | 346  |
| Query      | 1352 | TCAAAGCAGTGGACAAGAAGGCTGCTGGAGCTGGCAAGGTCAACCAAGTCTGCCAGAAAGCTCAGAAGGCTAAATGAATATTATCCCTAATACCTGCCACCCCACTCTTAATCAGTGGTGGGAAGACGGTCTCAGAACTGTTTGTTCAA   | 1501 |
| DC527884.1 | 1383 | .....                                                                                                                                                   | 1532 |
| BY794942.2 | 1381 | .....C.....                                                                                                                                             | 1530 |
| CF111220.1 | 1376 | .....C.....A.....A.....C.....G.....C.....                                                                                                               | 1525 |
| BX426149.2 | 346  | .....                                                                                                                                                   | 197  |
| BX418564.2 | 356  | .....                                                                                                                                                   | 207  |
| AL567209.3 | 317  | .....M...Y.....                                                                                                                                         | 167  |
|            |      | <div> <div> <div></div> <div></div> <div>A</div> </div> </div>                                                                                          |      |
| BX440470.1 | 357  | .....                                                                                                                                                   | 208  |
| BX420340.1 | 351  | .....                                                                                                                                                   | 202  |
| AL518238.2 | 351  | .....G.....                                                                                                                                             | 202  |
| BX459625.2 | 345  | .....                                                                                                                                                   | 196  |
| Query      | 1502 | TTGGCCATTTAAGTTTAGTAGTAAAGACTGGTTAATGATAACAATGCATCGTAAACCTTCAGAAGGAAGGAGAATgttttgtggaccactttgggtttcttttttgcgtgtggcagttttaagttattagtttttaaaatcagtact     | 1651 |
| DC527884.1 | 1533 | .....                                                                                                                                                   | 1682 |
| BY794942.2 | 1531 | .....                                                                                                                                                   | 1680 |
| CF111220.1 | 1526 | .....A.....G.....C.....                                                                                                                                 | 1664 |
| BX426149.2 | 196  | .....                                                                                                                                                   | 47   |
| BX418564.2 | 206  | .....                                                                                                                                                   | 57   |
| AL567209.3 | 166  | .....                                                                                                                                                   | 16   |

```

                                     |
                                     G
BX440470.1 207 .....
BX420340.1 201 .....
AL518238.2 201 .....
BX459625.2 195 .....

```

```

Query      1652 ttttaATGGAACAACCTTGACCAAAAATTTGTACAGAATTTTGAGAGCCCATTAAGTAAATG 1718
DC527884.1 1683 .....
BY794942.2 1681 .....
CF111220.1 1665 .....C.....T..... 1731

```

```

                                     \
                                     |
                                     C
BX426149.2 46 .....-.....G.....G.-..G.....T.. 1
BX418564.2 56 .....M..... 1
AL567209.3 15 ..... 1
BX440470.1 57 ..... 1
BX420340.1 51 .....R..... 1
AL518238.2 51 .....N.....N..... 1

```

```

                                     \
                                     |
                                     N
BX459625.2 45 ..... 1

```

Query= N6-15 [organism=Homo sapiens] eef1a1

Length=1144

| Sequences producing significant alignments: |                    |                                               | Score<br>(Bits) | E<br>Value | Max<br>ident |
|---------------------------------------------|--------------------|-----------------------------------------------|-----------------|------------|--------------|
| CR996534.1                                  | CR996534           | RZPD no.9017 Homo sapiens cDNA clone RZPDp... | 1437            | 0.0        | 100%         |
| CR982215.1                                  | CR982215           | RZPD no.9016 Homo sapiens cDNA clone RZPDp... | 1437            | 0.0        | 100%         |
| BX453401.2                                  | BX453401           | Homo sapiens T CELLS (JURKAT CELL LINE) Ho... | 1437            | 0.0        | 100%         |
| BX443032.2                                  | BX443032           | Homo sapiens B CELLS (RAMOS CELL LINE) Hom... | 1437            | 0.0        | 100%         |
| BX421307.2                                  | BX421307           | Homo sapiens B CELLS (RAMOS CELL LINE) Hom... | 1437            | 0.0        | 100%         |
| BX353545.2                                  | BX353545           | Homo sapiens NEUROBLASTOMA COT 25-NORMALIZ... | 1437            | 0.0        | 100%         |
| CX167214.1                                  | HESC2_49           | G11.g1 A035 NIH MGC 258 Homo sapiens cDNA ... | 1437            | 0.0        | 100%         |
| CA771972.1                                  | ic93g08.x1         | HR85 islet Homo sapiens cDNA clone IMAGE...   | 1437            | 0.0        | 100%         |
| BU845975.1                                  | AGENCOURT_10413042 | NIH_MGC_109 Homo sapiens cDNA cl...           | 1437            | 0.0        | 100%         |
| BU844361.1                                  | AGENCOURT_10414634 | NIH_MGC_109 Homo sapiens cDNA cl...           | 1437            | 0.0        | 100%         |

#### ALIGNMENTS

```

Query      357 CTTTAGAGTGAAGCTCTTCTGGGGACAAATGTGGGCTTCAATGTCAAGAATGTTGTCGTCAAGGATGTTGTCGTGGCAACGTTGCTGGTGACAGCAAAATGACCCACCAATGGAAAGCTGGGCTTCACTGCTCAGGTGATTATCCTG 506
CR996534.1 62 .....
CR982215.1 5 .....
BX453401.2 16 .....
BX443032.2 142 .....
BX421307.2 116 .....
BX353545.2 21 .....
CX167214.1 789 .....
CA771972.1 789 .....
BU845975.1 787 .....
BU844361.1 796 .....

```

```

Query      507 AACCATCCAGGCCAAATAAGCCCGGCTATGCCCTGTATTGGATTGCCACACGGCTCACATTGCATGCAAGTTTGTCTGAGCTGAAGGAAAGATTGATCGCCGTTCTGGTAAAGCTGGAAGATGGCCCTAAATTCCTGAAGTCTGGTG 656
CR996534.1 211 .....

```

```

                                     \
                                     |
                                     C
CR982215.1 154 .....

```

```

                                     \
                                     |
                                     C
BX453401.2 165 .....

```

```

                                     \
                                     |
                                     C
BX443032.2 291 .....

```

```

                                     \
                                     |
                                     C
BX421307.2 265 .....

```

```

                                     \
                                     |
                                     C
BX353545.2 170 .....

```

```

                                     \
                                     |

```

|            |     |       |   |       |     |
|------------|-----|-------|---|-------|-----|
| CX167214.1 | 640 | ..... | c | ..... | 490 |
|            |     |       | \ |       |     |
|            |     |       |   |       |     |
| CA771972.1 | 640 | ..... | c | ..... | 490 |
|            |     |       | \ |       |     |
|            |     |       |   |       |     |
| BU845975.1 | 638 | ..... | c | ..... | 488 |
|            |     |       | \ |       |     |
|            |     |       |   |       |     |
| BU844361.1 | 647 | ..... | c | ..... | 497 |
|            |     |       | \ |       |     |
|            |     |       |   |       |     |
|            |     |       | c |       |     |

|            |     |                                                                                                                                                        |     |
|------------|-----|--------------------------------------------------------------------------------------------------------------------------------------------------------|-----|
| Query      | 657 | ATGCTGCCATTGTTGATATGGTTCCTGGCAAGCCCATGTGTGTTGAGAGCTTCTCAGACTATCCACCTTTGGGTCGCTTTTGCTGTTCTGATATGAGACAGACAGTTGCGGTGGGTGTCATCAAAGCAGTGGACAAGAAGGCTGCTGGAG | 806 |
| CR996534.1 | 362 | .....                                                                                                                                                  | 511 |
| CR982215.1 | 305 | .....                                                                                                                                                  | 454 |
| BX453401.2 | 316 | .....                                                                                                                                                  | 465 |
| BX443032.2 | 442 | .....                                                                                                                                                  | 591 |
| BX421307.2 | 416 | .....                                                                                                                                                  | 565 |
| BX353545.2 | 321 | .....                                                                                                                                                  | 470 |
| CX167214.1 | 489 | .....                                                                                                                                                  | 340 |
| CA771972.1 | 489 | .....                                                                                                                                                  | 340 |
| BU845975.1 | 487 | .....                                                                                                                                                  | 338 |
| BU844361.1 | 496 | .....                                                                                                                                                  | 347 |

|            |     |                                                                                                                                                   |     |
|------------|-----|---------------------------------------------------------------------------------------------------------------------------------------------------|-----|
| Query      | 807 | CTGGCAAGGTCACCAAGTCTGCCAGAAAGCTCAGAAGGCTAAATGAATATTATCCCTAATACCTGCCACCCCACTCTTAATCAGTGGTGAAGAACGGTCTCAGAACTGTTTGTTCATTGGCCATTTAAGTTTAGTAGTAAAGACT | 956 |
| CR996534.1 | 512 | .....                                                                                                                                             | 661 |
| CR982215.1 | 455 | .....                                                                                                                                             | 604 |
| BX453401.2 | 466 | .....                                                                                                                                             | 615 |
| BX443032.2 | 592 | .....                                                                                                                                             | 741 |
| BX421307.2 | 566 | .....                                                                                                                                             | 715 |
| BX353545.2 | 471 | .....                                                                                                                                             | 620 |
| CX167214.1 | 339 | .....                                                                                                                                             | 190 |
| CA771972.1 | 339 | .....                                                                                                                                             | 190 |
| BU845975.1 | 337 | .....                                                                                                                                             | 188 |
| BU844361.1 | 346 | .....                                                                                                                                             | 197 |

|            |     |                                                                                                                                                        |      |
|------------|-----|--------------------------------------------------------------------------------------------------------------------------------------------------------|------|
| Query      | 957 | GGTTAATGATAACAATGCATCGTAAACCTTCAGAAGGAAAGGAGAATgttttgtggaccactttgttttcttttttgcgtgtggcagttttaagttattagtttttaaaatcagtagctttttaATGGAAACAACCTTGACCAAAAATTT | 1106 |
| CR996534.1 | 662 | .....                                                                                                                                                  | 811  |
| CR982215.1 | 605 | .....                                                                                                                                                  | 754  |
| BX453401.2 | 616 | .....                                                                                                                                                  | 765  |
| BX443032.2 | 742 | .....                                                                                                                                                  | 891  |
| BX421307.2 | 716 | .....                                                                                                                                                  | 865  |
| BX353545.2 | 621 | .....                                                                                                                                                  | 770  |
| CX167214.1 | 189 | .....                                                                                                                                                  | 40   |
| CA771972.1 | 189 | .....                                                                                                                                                  | 40   |
| BU845975.1 | 187 | .....                                                                                                                                                  | 38   |
| BU844361.1 | 196 | .....                                                                                                                                                  | 47   |

|            |      |                                         |      |
|------------|------|-----------------------------------------|------|
| Query      | 1107 | GTCACCAGAAATTTTGAGACCCATTAAAAAAGTTAAATG | 1144 |
| CR996534.1 | 812  | .....                                   | 848  |
| CR982215.1 | 755  | .....                                   | 791  |
| BX453401.2 | 766  | .....                                   | 802  |
| BX443032.2 | 892  | .....                                   | 928  |
| BX421307.2 | 866  | .....                                   | 902  |
| BX353545.2 | 771  | .....                                   | 807  |
| CX167214.1 | 39   | .....                                   | 3    |
| CA771972.1 | 39   | .....                                   | 3    |
| BU845975.1 | 37   | .....                                   | 1    |
| BU844361.1 | 46   | .....                                   | 10   |

Query= N7-11 [organism=Homo sapiens] eef1a1

Length=972

| Sequences producing significant alignments: |                                                        | Score<br>(Bits) | E<br>Value | Max<br>ident |
|---------------------------------------------|--------------------------------------------------------|-----------------|------------|--------------|
| CT005089.1                                  | CT005089 RZPD no.9017 Homo sapiens cDNA clone RZPDp... | 1201            | 0.0        | 100%         |
| CR999128.1                                  | CR999128 RZPD no.9017 Homo sapiens cDNA clone RZPDp... | 1201            | 0.0        | 100%         |
| CR996969.1                                  | CR996969 RZPD no.9017 Homo sapiens cDNA clone RZPDp... | 1201            | 0.0        | 100%         |
| CR996534.1                                  | CR996534 RZPD no.9017 Homo sapiens cDNA clone RZPDp... | 1201            | 0.0        | 100%         |
| CR982215.1                                  | CR982215 RZPD no.9016 Homo sapiens cDNA clone RZPDp... | 1201            | 0.0        | 100%         |
| CR977084.1                                  | CR977084 RZPD no.9016 Homo sapiens cDNA clone RZPDp... | 1201            | 0.0        | 100%         |
| CR975903.1                                  | CR975903 RZPD no.9016 Homo sapiens cDNA clone RZPDp... | 1201            | 0.0        | 100%         |
| BQ776023.1                                  | UI-H-FH0-bck-l-16-0-UI.s1 NCI_CGAP_FH0 Homo sapiens... | 1201            | 0.0        | 100%         |



BQ775888.1 UI-H-FH0-bcg-o-05-0-UI.s1 NCI\_CGAP\_FH0 Homo sapiens... 1201 0.0 100%  
BQ775886.1 UI-H-FH0-bcg-o-01-0-UI.s1 NCI\_CGAP\_FH0 Homo sapiens... 1201 0.0 100%

ALIGNMENTS

|            |     |                                                                                                                                                         |     |
|------------|-----|---------------------------------------------------------------------------------------------------------------------------------------------------------|-----|
| Query      | 323 | GTGATTATTCCTGAACCATCCAGGCCAAATAAGCGCCGCTATGCCCTGTATTGGATTGCCACCGGTCACATTGCATGCAAGTTTGTCTGAGCTGAAGGAAAAGATTGATCGCCGTTCTGGTAAAAAGCTGGAAGATGGCCCTAAATTC    | 472 |
| CT005089.1 | 25  | .....                                                                                                                                                   | 174 |
| CR999128.1 | 97  | .....                                                                                                                                                   | 246 |
| CR996969.1 | 130 | .....                                                                                                                                                   | 279 |
| CR996534.1 | 199 | .....                                                                                                                                                   | 348 |
| CR982215.1 | 142 | .....                                                                                                                                                   | 291 |
| CR977084.1 | 88  | .....                                                                                                                                                   | 237 |
| CR975903.1 | 19  | .....                                                                                                                                                   | 168 |
| BQ776023.1 | 668 | .....                                                                                                                                                   | 519 |
| BQ775888.1 | 668 | .....                                                                                                                                                   | 519 |
| BQ775886.1 | 668 | .....                                                                                                                                                   | 519 |
| Query      | 473 | TTGAAGTCTGGTGATGCTGCCATTGTTGATATGGTTCCTGGCAAGCCCATGTGTGTTGAGAGCTTCTCAGACTATCCACCTTTGGGTCGCTTGTGCTTCGTGATATGAGACAGACAGTTGCGGTGGGTGTCATCAAAGCAGTGGACAAG   | 622 |
| CT005089.1 | 175 | .....                                                                                                                                                   | 324 |
| CR999128.1 | 247 | .....                                                                                                                                                   | 396 |
| CR996969.1 | 280 | .....                                                                                                                                                   | 429 |
| CR996534.1 | 349 | .....                                                                                                                                                   | 498 |
| CR982215.1 | 292 | .....                                                                                                                                                   | 441 |
| CR977084.1 | 238 | .....                                                                                                                                                   | 387 |
| CR975903.1 | 169 | .....                                                                                                                                                   | 318 |
| BQ776023.1 | 518 | .....                                                                                                                                                   | 369 |
| BQ775888.1 | 518 | .....                                                                                                                                                   | 369 |
| BQ775886.1 | 518 | .....                                                                                                                                                   | 369 |
| Query      | 623 | AAGGCTGCTGGAGCTGGCAAGGTCAACAAGTCTGCCAGAAAGCTCAGAAGGCTAAATGAATATTATCCCTAATACCTGCCACCCCACTCTTAATCAGTGGTGGGAAGACGGTCTCAGAACTGTTGTTTCAATTGGCCATTTAAGTTTA    | 772 |
| CT005089.1 | 325 | .....                                                                                                                                                   | 474 |
| CR999128.1 | 397 | .....                                                                                                                                                   | 546 |
| CR996969.1 | 430 | .....                                                                                                                                                   | 579 |
| CR996534.1 | 499 | .....                                                                                                                                                   | 648 |
| CR982215.1 | 442 | .....                                                                                                                                                   | 591 |
| CR977084.1 | 388 | .....                                                                                                                                                   | 537 |
| CR975903.1 | 319 | .....                                                                                                                                                   | 468 |
| BQ776023.1 | 368 | .....                                                                                                                                                   | 219 |
| BQ775888.1 | 368 | .....                                                                                                                                                   | 219 |
| BQ775886.1 | 368 | .....                                                                                                                                                   | 219 |
| Query      | 773 | GTAGTAAAAGACTGGTTAATGATAACAATGCATCGTAAACCTTCAGAGAAGGAAGGAGATgttttgtggaccacttttggttttcttttttgcgtgtggcagttttaagttattagtttttaaaatcagtaactttttaATGGAACAACAT | 922 |
| CT005089.1 | 475 | .....                                                                                                                                                   | 624 |
| CR999128.1 | 547 | .....                                                                                                                                                   | 696 |
| CR996969.1 | 580 | .....                                                                                                                                                   | 729 |
| CR996534.1 | 649 | .....                                                                                                                                                   | 798 |
| CR982215.1 | 592 | .....                                                                                                                                                   | 741 |
| CR977084.1 | 538 | .....                                                                                                                                                   | 687 |
| CR975903.1 | 469 | .....                                                                                                                                                   | 618 |
| BQ776023.1 | 218 | .....                                                                                                                                                   | 69  |
| BQ775888.1 | 218 | .....                                                                                                                                                   | 69  |
| BQ775886.1 | 218 | .....                                                                                                                                                   | 69  |
| Query      | 923 | TGACCAAAAAATTTGTACAGAATTTTGAGACCCATTAAAAAAGTTAAATG                                                                                                      | 972 |
| CT005089.1 | 625 | .....                                                                                                                                                   | 674 |
| CR999128.1 | 697 | .....                                                                                                                                                   | 746 |
| CR996969.1 | 730 | .....                                                                                                                                                   | 779 |
| CR996534.1 | 799 | .....                                                                                                                                                   | 848 |
| CR982215.1 | 742 | .....                                                                                                                                                   | 791 |
| CR977084.1 | 688 | .....                                                                                                                                                   | 737 |
| CR975903.1 | 619 | .....                                                                                                                                                   | 668 |
| BQ776023.1 | 68  | .....                                                                                                                                                   | 19  |
| BQ775888.1 | 68  | .....                                                                                                                                                   | 19  |
| BQ775886.1 | 68  | .....                                                                                                                                                   | 19  |

Query= N8-C\* [organism=Homo sapiens] eef1a1

Length=1830

| Sequences producing significant alignments:                       |                 |            |              |
|-------------------------------------------------------------------|-----------------|------------|--------------|
|                                                                   | Score<br>(Bits) | E<br>Value | Max<br>ident |
| BY794942.2 BY794942 Homo sapiens eye Homo sapiens cDNA clone H... | 3155            | 0.0        | 100%         |
| DC527884.1 DC527884 chimpanzee skin cDNA library PstA Pan trog... | 3138            | 0.0        | 100%         |
| CF111220.1 Shultzomica04471 Rat lung airway and parenchyma cDN... | 2344            | 0.0        | 91%          |
| BX426149.2 BX426149 Homo sapiens NEUROBLASTOMA Homo sapiens cD... | 2146            | 0.0        | 99%          |
| CO001006.1 OC028 pre-oestrus adult sheep ovary library Ovis ar... | 2050            | 0.0        | 93%          |
| BX418564.2 BX418564 Homo sapiens FETAL BRAIN Homo sapiens cDNA... | 2047            | 0.0        | 97%          |
| BX426150.2 BX426150 Homo sapiens NEUROBLASTOMA Homo sapiens cD... | 2032            | 0.0        | 99%          |
| AL567209.3 AL567209 Homo sapiens FETAL BRAIN Homo sapiens cDNA... | 2001            | 0.0        | 98%          |
| BX440470.1 BX440470 Homo sapiens FETAL BRAIN Homo sapiens cDNA... | 1999            | 0.0        | 98%          |

## ALIGNMENTS

ATTC

| Query      | 417  | TCATTCGATGCCCCAGGACACAGAGAC | TCATCAAAAACATGATTACAGGACATCTCAGGCTGACTGTGCTGCTCTGATTGTTGCTGCTGGTGTGGTGAATTTGAAGCTGGTATCTCCAAGAAATGGGCAGACCCGAGAGCATGCCCTC | 566  |
|------------|------|-----------------------------|---------------------------------------------------------------------------------------------------------------------------|------|
| RY794942.2 | 333  | .....                       | .....                                                                                                                     | 482  |
| DC527884.1 | 336  | .....C.....                 | .....                                                                                                                     | 485  |
| CF111220.1 | 329  | .....C.....G.....           | .....G.....C.....T.....T.....                                                                                             | 478  |
| CO001006.1 | 1439 | .....C.....C.....C.....     | .....C.....C.....T.....                                                                                                   | 1290 |
| BX426150.2 | 304  | .....                       | .....                                                                                                                     | 453  |

|            |      |                                |                                                                                                                                       |      |
|------------|------|--------------------------------|---------------------------------------------------------------------------------------------------------------------------------------|------|
| Query      | 567  | TGCGCTTACACACTGGGTTGTAACAAC    | .....TTGTCGGTGTAAACAAATGGGATTCACACTGAGCACCCCTACAGCCAGGAAGAGATATGAGGAAATTTGTAAAGGAAGTCAGCACTTACATTAAAGAAAAATGGGCTACACACCCCGACACACAGTAG | 716  |
| BY94942.2  | 483  | .....                          | .....                                                                                                                                 | 632  |
| DC527884.1 | 486  | .....                          | .....                                                                                                                                 | 635  |
| CF111220.1 | 479  | .....TT.....G.....T.....C..... | .....A.....C.....A.....T.....C.....C.....C.....T.....                                                                                 | 628  |
| BX426149.2 | 1196 | .....                          | .....A.....C.....A.....T.....G.....C.....C.....                                                                                       | 1094 |
| CO001006.1 | 1289 | .....C.....T.....C.....        | .....T.....C.....C.....M.....C.....                                                                                                   | 1140 |
| BX418564.2 | 1196 | .....                          | .....VHVS.....R.....N.....G.....W.....R.....M.....K.....R.....S.....                                                                  | 1100 |
| BX426150.2 | 454  | .....                          | .....                                                                                                                                 | 603  |
| AL567209.3 | 1145 | .....                          | .....S.....W.....T.....R.....K.....W.....R.....A.....M.....C.....C.....                                                               | 1064 |

M

1

| Query      | 717  | CATTGTGCCAATTCTGGTGGAGTGCACCAATGCTGGAGGACAGCTGAACATGCCTGGTTCAGGGATGGAAGTCAACCGTAGGATGGCAATGCCAGTGGGAACACGCTGCTTGAGGCTCTGGAGCTGCATCTACACCA | 866 |
|------------|------|-------------------------------------------------------------------------------------------------------------------------------------------|-----|
| BY794942.2 | 633  | .....                                                                                                                                     | 782 |
| DC527884.1 | 636  | .....                                                                                                                                     | 785 |
| CF111220.1 | 629  | .....T.....G.....C.A.....G.....C.....G.A.....T.....T.G.G.....                                                                             | 778 |
| BX426149.2 | 1093 | .....                                                                                                                                     | 944 |
| CO001006.1 | 1139 | .....C.....T.....A.....C.....C.....A.....T.....G.....                                                                                     | 990 |
| BX418564.2 | 1099 | .....-.....-.....-.....                                                                                                                   | 954 |
| BX426150.2 | 604  | .....C.....T.....A.....C.....C.....A.....T.....G.....                                                                                     | 753 |
| AL567209.3 | 1063 | .....-.....S.M.....Y.....K.....                                                                                                           | 914 |
| BX440470.1 | 1100 | .....K.....M.M.....Y.T.....D.....K.....T.....T.....Y.....K.....A.....R.....                                                               | 956 |
| BX420340.1 | 1096 | .....K.....M.M.....Y.T.....D.....K.....T.....T.....Y.....K.....A.....R.....                                                               | 949 |

|            |     |                                                                                                                                                 |      |
|------------|-----|-------------------------------------------------------------------------------------------------------------------------------------------------|------|
| Query      | 867 | CTCGTCAACTGACAAAGCCCTTGGCACTCTCCAGGATGTCTACAAAATGGTGGTATTGGTACTGTTCCTGTTGGCCGAGTGAGACTGGTGTCTCAAAACCGGTATGGTGGTCACTTTGCTCCAGTCAACGGTTACAAAGGAAG | 1016 |
| BY794942.2 | 783 | .....                                                                                                                                           | 932  |
| DC527884.1 | 786 | .....                                                                                                                                           | 935  |
| CF111220.1 | 779 | .....TC...A...C.....T...C.C...C...C...G...A...T...T...T.A...T...                                                                                | 928  |
| BX426149.2 | 943 | .....                                                                                                                                           | 794  |
| CO001006.1 | 989 | ...C...A...TT...T...A...G.T.T...T.C...C...T.A...T.G...                                                                                          | 840  |
| EX418564.2 | 953 | .....C.....                                                                                                                                     | 804  |
| BX426150.2 | 754 | .....                                                                                                                                           | 903  |
| AL567209.3 | 913 | .....                                                                                                                                           | 764  |
| BX440470.1 | 955 | .....                                                                                                                                           | 806  |
| BX420340.1 | 948 | .....R.....                                                                                                                                     | 799  |

$$\frac{1}{2}$$

|            |     |        |     |
|------------|-----|--------|-----|
| AL567209.3 | 763 | .....- | 615 |
| BX440470.1 | 805 | .....  | 656 |

|            |      |                                                                                                                                                      |      |
|------------|------|------------------------------------------------------------------------------------------------------------------------------------------------------|------|
| BX420340.1 | 798  | .....                                                                                                                                                | 649  |
| Query      | 1167 | GCTTCACTGCTCAGGTGATTATCTGAACCATCCAGGCCAAATAAGCGCCGGCTATGCCCTGTATTGGATTGCCACACGGCTCACATTGCATGCAAGTTTGCTGAGCTGAAGGAAAAGATTGATCGCCGTTCTGGTAAAAAGCTGGAAG | 1316 |
| BY794942.2 | 1083 | .....                                                                                                                                                | 1233 |
|            |      | <div> <div>\</div> <div> </div> <div>G</div> </div>                                                                                                  |      |
| DC527884.1 | 1086 | .....                                                                                                                                                | 1235 |
| CF111220.1 | 1079 | .....G..C..T..T.....TC...C...C...A...C...T..A...G...C...T.....G.....                                                                                 | 1228 |
| BX426149.2 | 643  | .....                                                                                                                                                | 494  |
| CO001006.1 | 689  | .....C...A.....T.....C..T..GT..A...A...GC...T...A...T.....G...M.....T.....G.....                                                                     | 540  |
| BX418564.2 | 653  | .....                                                                                                                                                | 504  |
| BX426150.2 | 1051 | .....                                                                                                                                                | 1140 |
| AL567209.3 | 614  | .....                                                                                                                                                | 465  |
| BX440470.1 | 655  | .....                                                                                                                                                | 505  |
|            |      | <div> <div>\</div> <div> </div> <div>C</div> </div>                                                                                                  |      |
| BX420340.1 | 648  | .....                                                                                                                                                | 499  |
| Query      | 1317 | ATGGCCCTAAATCTTTGAAGTCTGGTGATGCTGCCATTGTTGATATGGTTCTGTGCAAGCCCATGTGTGTTGAGAGCTTCTCAGACTATCCACCTTTGGGTCGCTTTGCTGTTGATATGAGACAGACAGTTGCGGTGGGTGTCATCA  | 1466 |
| BY794942.2 | 1234 | .....                                                                                                                                                | 1383 |
| DC527884.1 | 1236 | .....                                                                                                                                                | 1385 |
| CF111220.1 | 1229 | .....C.....C...C.....A...T...C...T..AC..T...T.....C...G...T.....                                                                                     | 1378 |
| BX426149.2 | 493  | .....                                                                                                                                                | 344  |
| CO001006.1 | 539  | .....A.....C.....C.....T.....C.....T..T...T...T...C...C...T...G...C.....C..T.....                                                                    | 390  |
| BX418564.2 | 503  | .....                                                                                                                                                | 354  |
| AL567209.3 | 464  | .....K.....                                                                                                                                          | 315  |
| BX440470.1 | 504  | .....                                                                                                                                                | 355  |
| BX420340.1 | 498  | .....                                                                                                                                                | 349  |
| Query      | 1467 | AAGCAGTGGACAAGAAGCTGCTGGAGCTGGCAAGSTCACCAAGTCTGCCAGAAAGCTCAGAAGGCTAAATGAATATTATCCCTAATACCTGCCACCCCACTCTTAATCAGTGGTGAAGAAGCGTCTCAGAACTGTTTGTTCAAATTG  | 1616 |
| BY794942.2 | 1384 | .....                                                                                                                                                | 1533 |
| DC527884.1 | 1386 | .....                                                                                                                                                | 1535 |
| CF111220.1 | 1379 | .....C.....A.....A.....C.....G.....C.....                                                                                                            | 1528 |
| BX426149.2 | 343  | .....                                                                                                                                                | 194  |
| CO001006.1 | 389  | .....A.....C.....G.....C.....                                                                                                                        | 240  |
| BX418564.2 | 353  | .....                                                                                                                                                | 204  |
| AL567209.3 | 314  | .....M...Y.....                                                                                                                                      | 164  |
|            |      | <div> <div>\</div> <div> </div> <div>A</div> </div>                                                                                                  |      |
| BX440470.1 | 354  | .....                                                                                                                                                | 205  |
| BX420340.1 | 348  | .....                                                                                                                                                | 199  |
| Query      | 1617 | GCCATTAAAGTTTAGTAGTAAAGACTGGTTAATGATAACAATGCATCGTAAACCTTCAGAAGGAAGGAGAAATgttttgtggaccactttgttttcttttttgcgtgtggcagttttaagttattagtttttaaaatcagtaactttt | 1766 |
| BY794942.2 | 1534 | .....                                                                                                                                                | 1683 |
| DC527884.1 | 1536 | .....                                                                                                                                                | 1685 |
| CF111220.1 | 1529 | .....A.....G.....C.....                                                                                                                              | 1667 |
| BX426149.2 | 193  | .....                                                                                                                                                | 44   |
| CO001006.1 | 239  | .....A.....A.....G.....G.....                                                                                                                        | 99   |
|            |      | <div> <div>\</div> <div> </div> <div>T</div> </div>                                                                                                  |      |
| BX418564.2 | 203  | .....                                                                                                                                                | 54   |
| AL567209.3 | 163  | .....                                                                                                                                                | 13   |
|            |      | <div> <div>\</div> <div> </div> <div>G</div> </div>                                                                                                  |      |
| BX440470.1 | 204  | .....                                                                                                                                                | 55   |
| BX420340.1 | 198  | .....                                                                                                                                                | 49   |
| Query      | 1767 | taATGGAAACAACCTTGACCAAAAATTTGTCACAGAATTTTGAGACCCATTAAAAAAGTTAAATG                                                                                    | 1830 |
| BY794942.2 | 1684 | .....                                                                                                                                                | 1747 |
| DC527884.1 | 1686 | .....                                                                                                                                                | 1749 |
| CF111220.1 | 1668 | .....C.....T.....                                                                                                                                    | 1731 |
|            |      | <div> <div>\</div> <div> </div> <div>C</div> </div>                                                                                                  |      |
| BX426149.2 | 43   | .....G.....G.....G.....T..                                                                                                                           | 1    |
| CO001006.1 | 98   | .....A.....C.....T.....                                                                                                                              | 35   |
|            |      | <div> <div>\</div> <div> </div> <div>A</div> </div>                                                                                                  |      |
| BX418564.2 | 53   | .....M-.....                                                                                                                                         | 1    |
| AL567209.3 | 12   | .....                                                                                                                                                | 1    |
| BX440470.1 | 54   | .....                                                                                                                                                | 1    |
| BX420340.1 | 48   | .....R.....                                                                                                                                          | 1    |

Query= N9-C\* [organism=Homo sapiens] eef1a1

Length=2090

| Sequences producing significant alignments: |                 |                                                                                            | Score<br>(Bits) | E<br>Value | Max<br>ident |
|---------------------------------------------|-----------------|--------------------------------------------------------------------------------------------|-----------------|------------|--------------|
| BY794942.2                                  | BY794942        | Homo sapiens eye Homo sapiens cDNA clone H...                                              | 3155            | 0.0        | 100%         |
| DC527884.1                                  | DC527884        | chimpanzee skin cDNA library PstA Pan trog...                                              | 3138            | 0.0        | 100%         |
| CF111220.1                                  | Shultzomlca0471 | Rat lung airway and parenchyma cDN...                                                      | 2344            | 0.0        | 91%          |
| BX426149.2                                  | BX426149        | Homo sapiens NEUROBLASTOMA Homo sapiens cD...                                              | 2146            | 0.0        | 99%          |
| CO001006.1                                  | OC028           | pre-oestrus adult sheep ovary library Ovis ar...                                           | 2050            | 0.0        | 93%          |
| BX418564.2                                  | BX418564        | Homo sapiens FETAL BRAIN Homo sapiens cDNA...                                              | 2047            | 0.0        | 97%          |
| BX426150.2                                  | BX426150        | Homo sapiens NEUROBLASTOMA Homo sapiens cD...                                              | 2034            | 0.0        | 99%          |
| AL567209.3                                  | AL567209        | Homo sapiens FETAL BRAIN Homo sapiens cDNA...                                              | 2001            | 0.0        | 98%          |
| BX440470.1                                  | BX440470        | Homo sapiens FETAL BRAIN Homo sapiens cDNA...                                              | 1999            | 0.0        | 98%          |
| BX420340.1                                  | BX420340        | Homo sapiens FETAL BRAIN Homo sapiens cDNA...                                              | 1997            | 0.0        | 99%          |
| ALIGNMENTS                                  |                 |                                                                                            |                 |            |              |
| Query                                       | 376             | TCAAAGGTGTCGTGAAAACCTACCCCTAAAAGCCAAAATGGGAAGGAAAAGACTCATATCAACATTGTCGTCA                  |                 |            | 525          |
| BY794942.2                                  | 33              | ..C.....                                                                                   |                 |            | 181          |
| DC527884.1                                  | 36              | ..C.....                                                                                   |                 |            | 184          |
| CF111220.1                                  | 28              | .....T.....G.C...G.....A.....C.....C.....A.....C.....A..C.....C.....C.....T.....A.....     |                 |            | 177          |
|                                             |                 | \                                                                                          |                 |            |              |
|                                             |                 |                                                                                            |                 |            |              |
|                                             |                 | ATTC                                                                                       |                 |            |              |
| BX426150.2                                  | 3               | ...C.....                                                                                  |                 |            | 152          |
| Query                                       | 526             | ATTGAAAAATTTGAGAAGGAGCTGCTGAGATGGGAAAGGGCTCCTTCAAGTATGCTGGGTCTTGGATAA                      |                 |            | 675          |
| BY794942.2                                  | 182             | .....                                                                                      |                 |            | 331          |
| DC527884.1                                  | 185             | .....                                                                                      |                 |            | 334          |
| CF111220.1                                  | 178             | .....G.....G.....A.....C.....C.....G.....T.....C.....C.....G.....                          |                 |            | 327          |
| CO001006.1                                  | 1464            | .....                                                                                      |                 |            | 1441         |
| BX426150.2                                  | 153             | .....                                                                                      |                 |            | 302          |
| Query                                       | 676             | ATCATTGATGCCCCAGGACACAGAGACTTTATCAAAAACATGATTACAGGACATCTCAGGCTGACTGTGCTGTCTG               |                 |            | 825          |
| BY794942.2                                  | 332             | .....                                                                                      |                 |            | 481          |
| DC527884.1                                  | 335             | .....C.....                                                                                |                 |            | 484          |
| CF111220.1                                  | 328             | .....C.....G.....G.....C.....C.....G.....C.....T.....T.....                                |                 |            | 477          |
| CO001006.1                                  | 1440            | .....C.....C.....C.....C.....C.....C.....T.....                                            |                 |            | 1291         |
| BX426150.2                                  | 303             | .....                                                                                      |                 |            | 452          |
| Query                                       | 826             | CTGGCTTACACACTGGGTGTGAAACAACATAATTGTCGGTGTAAACAAAATGGATTCCACTGAGCCACCC                     |                 |            | 975          |
| BY794942.2                                  | 482             | .....                                                                                      |                 |            | 631          |
| DC527884.1                                  | 485             | .....                                                                                      |                 |            | 634          |
| CF111220.1                                  | 478             | .....TT.....G.....T.....C.....A.....A.....T.....G.....C.....C.....T.....                   |                 |            | 627          |
| BX426149.2                                  | 1196            | .....                                                                                      |                 |            | 1095         |
| CO001006.1                                  | 1290            | .....C.....T.....C.....T.....C.....C.....C.....C.....C.....C.....                          |                 |            | 1141         |
| BX418564.2                                  | 1196            | .....YH.VS.-.R.-.W.-.G.W.-.R.-.M.-.K.-.R.-.S.-.R.-.                                        |                 |            | 1101         |
| BX426150.2                                  | 453             | .....                                                                                      |                 |            | 602          |
| AL567209.3                                  | 1145            | .....S.....W.....K.W.....R.....A.M.C.....C.....                                            |                 |            | 1065         |
|                                             |                 | \                                                                                          |                 |            |              |
|                                             |                 | M                                                                                          |                 |            |              |
| BX440470.1                                  | 1128            | .....-W.-.....                                                                             |                 |            | 1102         |
|                                             |                 | \                                                                                          |                 |            |              |
|                                             |                 | C                                                                                          |                 |            |              |
| BX420340.1                                  | 1117            | .....M..M.....                                                                             |                 |            | 1098         |
| Query                                       | 976             | GCATTTGTGCCAATTTCTGGTTGGAATGGTGACAACATGCTGGAGCCAAAGTGCTAACATGCCTTGGTTC                     |                 |            | 1125         |
| BY794942.2                                  | 632             | .....                                                                                      |                 |            | 781          |
| DC527884.1                                  | 635             | .....                                                                                      |                 |            | 784          |
| CF111220.1                                  | 628             | .....T.....G.....C.....A.....G.....C.....G.....A.....T.....T.....G.....G.....              |                 |            | 777          |
| BX426149.2                                  | 1094            | .....                                                                                      |                 |            | 945          |
| CO001006.1                                  | 1140            | .....C.....T.....A.....C.....C.....C.....C.....A.....T.....G.....                          |                 |            | 991          |
| BX418564.2                                  | 1100            | .....                                                                                      |                 |            | 955          |
| BX426150.2                                  | 603             | .....                                                                                      |                 |            | 752          |
| AL567209.3                                  | 1064            | .....K.....                                                                                |                 |            | 915          |
| BX440470.1                                  | 1101            | .....S.M...Y.-.K.....K.....R.....                                                          |                 |            | 957          |
| BX420340.1                                  | 1097            | .....K.-..M.W...YT...D...K.....T.....Y.....A.....                                          |                 |            | 950          |
| Query                                       | 1126            | ACTCGTCCAACCTGACAAGCCCTTGGCCTGCCTCTCCAGGATGCTACAAAATTTGGTGGTATTGGTACTGTTC                  |                 |            | 1275         |
| BY794942.2                                  | 782             | .....                                                                                      |                 |            | 931          |
| DC527884.1                                  | 785             | .....                                                                                      |                 |            | 934          |
| CF111220.1                                  | 778             | .....TC..A.....C.....T.....C.....C.....C.....G.....A.....T.....T.....T.....A.....T.....    |                 |            | 927          |
| BX426149.2                                  | 944             | .....                                                                                      |                 |            | 795          |
| CO001006.1                                  | 990             | .....C.....A.....TT.....T.....A.....G..T..T.....T.....C.....C.....T.....A.....T.....G..... |                 |            | 841          |
| BX418564.2                                  | 954             | .....C.....                                                                                |                 |            | 805          |
| BX426150.2                                  | 753             | .....                                                                                      |                 |            | 902          |
| AL567209.3                                  | 914             | .....                                                                                      |                 |            | 765          |
| BX440470.1                                  | 956             | .....                                                                                      |                 |            | 807          |
| BX420340.1                                  | 949             | .....R.....                                                                                |                 |            | 800          |

|            |      |                                                                                                                                                        |      |
|------------|------|--------------------------------------------------------------------------------------------------------------------------------------------------------|------|
| Query      | 1276 | GTAAATCTGTCGAATGCACCATGAAGCTTTGAGTGAAGCTCTTCTGGGACAAATGTGGGCTCAATGTCAAGAATGTGTCTGTCAAGGATGTTCTGCTGGCAACGTTGCTGGTGACAGCAAAAATGAACCAACCAATGGAGCAGCT      | 1425 |
| BY794942.2 | 932  | .....                                                                                                                                                  | 1081 |
| DC527884.1 | 935  | .....                                                                                                                                                  | 1084 |
| CF111220.1 | 928  | .C..G...G.....G.....A.....C..A..C.....A..C..A.A.....T.....G.....                                                                                       | 1077 |
| BX426149.2 | 794  | .....                                                                                                                                                  | 645  |
| CO001006.1 | 840  | .G..G..C..A.....C.....C.....A..C.....T..G.....T..C.....T.....                                                                                          | 691  |
| BX418564.2 | 804  | .....                                                                                                                                                  | 655  |
| BX426150.2 | 903  | .....                                                                                                                                                  | 1049 |
|            |      | <div> <div> </div> <div> </div> <div> </div> </div>                                                                                                    |      |
| AL567209.3 | 764  | .....                                                                                                                                                  | 616  |
| BX440470.1 | 806  | .....                                                                                                                                                  | 657  |
| BX420340.1 | 799  | .....                                                                                                                                                  | 650  |
| Query      | 1426 | GGCTTCAGTGTCTCAGGTGATTATCCTGAACCATCCAGGCCAAATAAGCGCCGGCTATGCCCTGTATTGGATTGCCACACGGCTCACATTGCATGCAAGTTTGCTGAGCTGAAGGAAAAGATTGATCGCCGTTCTGGTAAAAAGCTGGAA | 1575 |
| BY794942.2 | 1082 | .....                                                                                                                                                  | 1232 |
|            |      | <div> <div> </div> <div> </div> <div> </div> </div>                                                                                                    |      |
| DC527884.1 | 1085 | .....                                                                                                                                                  | 1234 |
| CF111220.1 | 1078 | .....G..C..T..T.....TC...C.....C.....A.....C.....T..A..G.....C.....T.....G.....                                                                        | 1227 |
| BX426149.2 | 644  | .....                                                                                                                                                  | 495  |
| CO001006.1 | 690  | ...C..A.....T.....C..T.GT..A..A..GC.....T..A.....T.....G.....T.....G.....                                                                              | 541  |
| BX418564.2 | 654  | .....                                                                                                                                                  | 505  |
| BX426150.2 | 1050 | .....                                                                                                                                                  | 1140 |
| AL567209.3 | 615  | .....                                                                                                                                                  | 466  |
| BX440470.1 | 656  | .....                                                                                                                                                  | 506  |
|            |      | <div> <div> </div> <div> </div> <div> </div> </div>                                                                                                    |      |
| BX420340.1 | 649  | .....                                                                                                                                                  | 500  |
| Query      | 1576 | GATGGCCCTAAATCTTGAAGTCTGGTGATGCTGCCATTGTTGATATGGTTCCTGGCAAGCCCATGTGTGTTGAGAGCTTCTCAGACTATCCACCTTTGGGTCGCTTTGCTGTTCTGTGATATGAGACAGACAGTTGCGGTGGGTGTCACT | 1725 |
| BY794942.2 | 1233 | .....                                                                                                                                                  | 1382 |
| DC527884.1 | 1235 | .....                                                                                                                                                  | 1384 |
| CF111220.1 | 1228 | .....C.....C.....C.....A.....T.....C..T..AC.T.....T.....C.....G.....T.....                                                                             | 1377 |
| BX426149.2 | 494  | .....                                                                                                                                                  | 345  |
| CO001006.1 | 540  | .....A.....C.....C.....T.....C.....T..T..T.....T..C.....C..T.....G.....C.....C..T.....                                                                 | 391  |
| BX418564.2 | 504  | .....                                                                                                                                                  | 355  |
| AL567209.3 | 465  | .....K.....                                                                                                                                            | 316  |
| BX440470.1 | 505  | .....                                                                                                                                                  | 356  |
| BX420340.1 | 499  | .....                                                                                                                                                  | 350  |
| Query      | 1726 | AAAGCAGTGGACAAGAAGGCTGCTGGAGCTGGCAAGGTACCAAGTCTGCCAGAAAGCTCAGAAGGCTAANTGAATATTTATCCCTAATACCTGGCACCCCACTCTTAATCAGTGGTGAAGAACGGTCTCAGAACTGTTTGTTCATTT    | 1875 |
| BY794942.2 | 1383 | .....                                                                                                                                                  | 1532 |
| DC527884.1 | 1385 | .....                                                                                                                                                  | 1534 |
| CF111220.1 | 1378 | ....C.....A.....A.....C.....G.....C.....C.....                                                                                                         | 1527 |
| BX426149.2 | 344  | .....                                                                                                                                                  | 195  |
| CO001006.1 | 390  | .....A.....C.....C.....G.....C.....C.....                                                                                                              | 241  |
| BX418564.2 | 354  | .....                                                                                                                                                  | 205  |
| AL567209.3 | 315  | .....M.....Y.....                                                                                                                                      | 165  |
|            |      | <div> <div> </div> <div> </div> <div> </div> </div>                                                                                                    |      |
| BX440470.1 | 355  | .....                                                                                                                                                  | 206  |
| BX420340.1 | 349  | .....                                                                                                                                                  | 200  |
| Query      | 1876 | GGCCATTTAAGTTTAGTAGTAAAGACTGGTTAATGATAACAATGCATCGTAAACCTTCAGAAGGAAGGAGAATgttttgtggaccactttgttttttttttgcgtgtggcagttttaagttattagtttttaaaatcagttacttt     | 2025 |
| BY794942.2 | 1533 | .....                                                                                                                                                  | 1682 |
| DC527884.1 | 1535 | .....                                                                                                                                                  | 1684 |
| CF111220.1 | 1528 | .....A.....G.....C.....                                                                                                                                | 1666 |
| BX426149.2 | 194  | .....                                                                                                                                                  | 45   |
| CO001006.1 | 240  | .....A.....A.....G.....                                                                                                                                | 100  |
|            |      | <div> <div> </div> <div> </div> <div> </div> </div>                                                                                                    |      |
| BX418564.2 | 204  | .....                                                                                                                                                  | 55   |
| AL567209.3 | 164  | .....                                                                                                                                                  | 14   |
|            |      | <div> <div> </div> <div> </div> <div> </div> </div>                                                                                                    |      |
| BX440470.1 | 205  | .....                                                                                                                                                  | 56   |
| BX420340.1 | 199  | .....                                                                                                                                                  | 50   |
| Query      | 2026 | ttaATGGAAACAACCTTGACCAAAAAATTTGTACAGAAATTTTGAGACCCATTAAAAAAGTTAAATG                                                                                    | 2090 |
| BY794942.2 | 1683 | .....                                                                                                                                                  | 1747 |
| DC527884.1 | 1685 | .....                                                                                                                                                  | 1749 |
| CF111220.1 | 1667 | .....C.....T.....                                                                                                                                      | 1731 |
|            |      | <div> <div> </div> <div> </div> <div> </div> </div>                                                                                                    |      |



|            |      |                                                                                                                                                             |      |
|------------|------|-------------------------------------------------------------------------------------------------------------------------------------------------------------|------|
| Query      | 751  | .....TGAGGCTCTGGACTGCATCCTACCACCAACTCGTCCAACTGACAAGCCCTTGGCGCTGGCTCTCCAGGATGCTACAAAAATTGGTGGTATTGGTACTGTTCCCTGTTGGCCGAGTGGAGACTGGTGTCTCAAACCCGGTATGGTGGTCAC | 900  |
| DC527884.1 | 757  | .....                                                                                                                                                       | 906  |
| BY794942.2 | 754  | .....                                                                                                                                                       | 903  |
| CF111220.1 | 750  | G..A..T.....T..G..G.....TC..A...C.....T.....C..C..C..C..G.....A.....T.....T.....                                                                            | 899  |
| BX426149.2 | 972  | .....                                                                                                                                                       | 823  |
| CO001006.1 | 1018 | ..A.....T.....G.....C.....A.....TT.....T.....A..G..T..T.....T..C.....                                                                                       | 869  |
| BX418564.2 | 982  | .....                                                                                                                                                       | 833  |
| BX426150.2 | 725  | .....C.....                                                                                                                                                 | 874  |
| AL567209.3 | 942  | .....K.....                                                                                                                                                 | 793  |
| BX440470.1 | 984  | .....R.....                                                                                                                                                 | 835  |
| BX420340.1 | 977  | .....A.....R.....                                                                                                                                           | 828  |
| Query      | 901  | CTTTGCTCCAGTCAACGTTACAACGGAAGTAAAACTGTGCGAAATGCACCACTGAAGCTTTGAGTGAAGCTCTTCTCTGGGACAATGTGGGCTTCAATGTCAAGAATGTCTGTCTGCAAGGATGTTCTGCTGGCAACGTTGCTGTTGACAG     | 1050 |
| DC527884.1 | 907  | .....                                                                                                                                                       | 1056 |
| BY794942.2 | 904  | .....                                                                                                                                                       | 1053 |
| CF111220.1 | 900  | .....T..A.....T.....C..G...G.....G.....A.....C...A...C.....A..C...A.A.....T.....G.....                                                                      | 1049 |
| BX426149.2 | 822  | .....                                                                                                                                                       | 673  |
| CO001006.1 | 868  | .....C.....T..A.....T..G..G..G..C..A.....C.....C.....A...C.....T..G.....                                                                                    | 719  |
| BX418564.2 | 832  | .....                                                                                                                                                       | 683  |
| BX426150.2 | 875  | .....                                                                                                                                                       | 1023 |
|            |      | .....G.....                                                                                                                                                 |      |
| AL567209.3 | 792  | .....                                                                                                                                                       | 643  |
| BX440470.1 | 834  | .....                                                                                                                                                       | 685  |
| BX420340.1 | 827  | .....                                                                                                                                                       | 678  |
| Query      | 1051 | CAAAAATGACCCACCAATGGAAAGCAGCTGGCTTCACTGCTCAGGTGATTATCCTGAACCATCCAGGCCAAATAGCGCCGGCTATGCCCTGTATTGGATTGCCACACGGCTCACATTGCATGCAAGTTTGTCTGAGCTGAAGGAAAAGAT      | 1200 |
| DC527884.1 | 1057 | .....                                                                                                                                                       | 1206 |
| BY794942.2 | 1054 | .....                                                                                                                                                       | 1204 |
|            |      | .....G.....                                                                                                                                                 |      |
| CF111220.1 | 1050 | .....G..C..T..T.....TC...C.....C.....A.....C.....T..A..G.....                                                                                               | 1199 |
| BX426149.2 | 672  | .....                                                                                                                                                       | 523  |
| CO001006.1 | 718  | .....T.....C.....T.....C...A.....T.....C..T.GT..A...A...GC.....T...A.....T.....G.....                                                                       | 569  |
| BX418564.2 | 682  | .....                                                                                                                                                       | 533  |
| BX426150.2 | 1024 | .....-.....-.....-.....-.....-.....-.....T..-.....                                                                                                          | 1140 |
| AL567209.3 | 642  | .....-.....-.....-.....-.....-.....-.....                                                                                                                   | 494  |
| BX440470.1 | 684  | .....                                                                                                                                                       | 534  |
|            |      | .....C.....                                                                                                                                                 |      |
| BX420340.1 | 677  | .....                                                                                                                                                       | 528  |
| Query      | 1201 | TGATCGCCGTTCTGGTAAAAAGCTGGAAGATGGCCCTAAATTTCTGAAGTCTGGTGATGCTGCCATTGTTGATATGGTTCTCTGGCAAGCCCATGTGTGTGAGAGCTTCTCAGACTATCCACCTTTGGGTGCTTTTGCTGTCTGTGATAT      | 1350 |
| DC527884.1 | 1207 | .....                                                                                                                                                       | 1356 |
| BY794942.2 | 1205 | .....                                                                                                                                                       | 1354 |
| CF111220.1 | 1200 | C.....T.....G.....C.....C.....C.....A.....T.....C..T..AC.T.....T.....C.....                                                                                 | 1349 |
| BX426149.2 | 522  | .....                                                                                                                                                       | 373  |
| CO001006.1 | 568  | .....T.....G.....A.....C.....C.....T.....C.....T..T..T.....T..C.....C..T.....G..C.....                                                                      | 419  |
| BX418564.2 | 532  | .....                                                                                                                                                       | 383  |
| AL567209.3 | 493  | .....K.....                                                                                                                                                 | 344  |
| BX440470.1 | 533  | .....                                                                                                                                                       | 384  |
| BX420340.1 | 527  | .....                                                                                                                                                       | 378  |
| Query      | 1351 | GAGACAGACAGTTGGCGTGGGTGTCTATCAAGCAGTGGACAGAAGGCTGTCTGGAGCTGGCAAGGTCACCAAGTCTGCCCAGAAAGCTCAGAAGGCTAAATGAATATATATCCCTAATACCTGCCACCCCACTCTTAATCAGTCGTTGGAAG    | 1500 |
| DC527884.1 | 1397 | .....A.....                                                                                                                                                 | 1506 |
| BY794942.2 | 1355 | .....                                                                                                                                                       | 1504 |
| CF111220.1 | 1350 | ..G.....T.....C.....A.....A.....A.....C.....G.....                                                                                                          | 1499 |
| BX426149.2 | 372  | .....                                                                                                                                                       | 223  |
| CO001006.1 | 418  | .....C..T.....A.....C.....C.....C.....G.....                                                                                                                | 269  |
| BX418564.2 | 382  | .....                                                                                                                                                       | 233  |
| AL567209.3 | 343  | .....M.....Y.....                                                                                                                                           | 193  |
|            |      | .....A.....                                                                                                                                                 |      |
| BX440470.1 | 383  | .....                                                                                                                                                       | 234  |
| BX420340.1 | 377  | .....                                                                                                                                                       | 228  |
| Query      | 1501 | AACGGTCTCAGAACTGTTTGTTCATTTGGCCATTTAAGTTTAGTAGTAAAAAGACTGGTTAATGATAACAATGCATCGTAAACCTTCAGAAGGAAGGAGAAATgtttttgtggaccacttttggtttcttttttgcgtgtggcagtttta      | 1650 |
| DC527884.1 | 1507 | .....                                                                                                                                                       | 1656 |
| BY794942.2 | 1505 | .....                                                                                                                                                       | 1654 |
| CF111220.1 | 1500 | .....C.....A.....                                                                                                                                           | 1638 |
| BX426149.2 | 222  | .....                                                                                                                                                       | 73   |
| CO001006.1 | 268  | .....C.....A.....                                                                                                                                           | 128  |
|            |      | .....T.....                                                                                                                                                 |      |
| BX418564.2 | 232  | .....                                                                                                                                                       | 83   |
| AL567209.3 | 192  | .....                                                                                                                                                       | 42   |





|            |      |                                                                                                                                                           |      |
|------------|------|-----------------------------------------------------------------------------------------------------------------------------------------------------------|------|
| BY794942.2 | 606  | .....                                                                                                                                                     | 755  |
| CF111220.1 | 602  | .....T.....G.....C.A.....G.....C.....G.....                                                                                                               | 751  |
| BX426149.2 | 1120 | .....                                                                                                                                                     | 971  |
| CO001006.1 | 1166 | .....C.....T.....A.....C.....C.....                                                                                                                       | 1017 |
| BX418564.2 | 1124 | .....S.....-.....R.....-.....-.....C.....-.....                                                                                                           | 981  |
| BX426150.2 | 577  | .....                                                                                                                                                     | 726  |
| AL567209.3 | 1090 | .....C.....                                                                                                                                               | 941  |
| BX440470.1 | 1124 | .....-W.....-.....-S.M.Y.-K.....-.....K.....                                                                                                              | 983  |
|            |      |                                                                                                                                                           |      |
|            |      |                                                                                                                                                           |      |
| BX420340.1 | 1117 | .....M.M.....C.....K.-..M.W...YT...D...K.-.....T.....Y.....                                                                                               | 976  |
| Query      | 752  | AGGCTCTGACTGCATCCTACACCAACTCGTCAACTGACAACTTTGCGCCTGCCTCTCCAGGATGTTCTACAAAATGTGTATTGGTACTGTTCTGTGTGGCCGAGTGAGACTGGTGTCTCAAACCCGGTATGGTGGTCACCTTTGCTCCAG    | 901  |
| DC527884.1 | 759  | .....                                                                                                                                                     | 917  |
|            |      |                                                                                                                                                           |      |
|            |      |                                                                                                                                                           |      |
| BY794942.2 | 756  | .....                                                                                                                                                     | 914  |
|            |      |                                                                                                                                                           |      |
| CF111220.1 | 752  | .A..T.....T..C.G.....A.....C.....T.....G.C.....C.....G.....A.....T.....T.....                                                                             | 910  |
|            |      |                                                                                                                                                           |      |
|            |      |                                                                                                                                                           |      |
| BX426149.2 | 970  | .....                                                                                                                                                     | 812  |
|            |      |                                                                                                                                                           |      |
| CO001006.1 | 1016 | .A.....T.....C.....C.....TT.....T.....A.....G..T..T.....T..C.....C.....                                                                                   | 858  |
|            |      |                                                                                                                                                           |      |
| BX418564.2 | 980  | .....                                                                                                                                                     | 822  |
|            |      |                                                                                                                                                           |      |
| BX426150.2 | 727  | .....                                                                                                                                                     | 885  |
|            |      |                                                                                                                                                           |      |
|            |      |                                                                                                                                                           |      |
| AL567209.3 | 940  | .....                                                                                                                                                     | 782  |
|            |      |                                                                                                                                                           |      |
| BX440470.1 | 982  | .....                                                                                                                                                     | 824  |
|            |      |                                                                                                                                                           |      |
| BX420340.1 | 975  | .....                                                                                                                                                     | 817  |
|            |      |                                                                                                                                                           |      |
| Query      | 902  | TCAACGTTTACAACGGAAGTAAAAATCTGTGCAAAATGCACCATGAAGCTTTGAGTGAAGCTCTTCTCTGGGACAATGTGGGCTTCAATGTCAAGAATGTGTCTGTCAAGGATGTTTCGTCTGGCAACGTTGCTGGTGACAGCAAAAATGACC | 1051 |
| DC527884.1 | 918  | .....                                                                                                                                                     | 1067 |
| BY794942.2 | 915  | .....                                                                                                                                                     | 1064 |
| CF111220.1 | 911  | .....T..A.....T.....C..G.....G.....G.....A.....C..A.....C.....A..C.....A.A.....T.....G.....                                                               | 1060 |
| BX426149.2 | 811  | .....                                                                                                                                                     | 662  |
| CO001006.1 | 857  | .....T..A.....T..G..G..G..C..A.....C.....C.....A.....C.....T..G.....T.....                                                                                | 708  |
| BX418564.2 | 821  | .....                                                                                                                                                     | 672  |
| BX426150.2 | 886  | .....                                                                                                                                                     | 1034 |
|            |      |                                                                                                                                                           |      |
|            |      |                                                                                                                                                           |      |
| AL567209.3 | 781  | .....                                                                                                                                                     | 633  |
| BX440470.1 | 823  | .....                                                                                                                                                     | 674  |
| BX420340.1 | 816  | .....                                                                                                                                                     | 667  |
|            |      |                                                                                                                                                           |      |
| Query      | 1052 | CACCAATGGAAGCAGCTGGCTTCACTGCTCAGGTGATTATCTGTAACCATCCAGGCCAAATAAGCGCGGCTATGCCCTGTATTGGATTGCCACACGGCTCACATTGCATGCAAGTTTGCTGAGCTGAAGGAAAAGATTGATCGCGTT       | 1201 |
| DC527884.1 | 1068 | .....                                                                                                                                                     | 1217 |
| BY794942.2 | 1065 | .....                                                                                                                                                     | 1215 |
|            |      |                                                                                                                                                           |      |
|            |      |                                                                                                                                                           |      |



|            |          |                                               |      |     |     |
|------------|----------|-----------------------------------------------|------|-----|-----|
| BX442182.2 | BX442182 | Homo sapiens FETAL BRAIN Homo sapiens cDNA... | 1873 | 0.0 | 99% |
| BX418589.2 | BX418589 | Homo sapiens FETAL BRAIN Homo sapiens cDNA... | 1873 | 0.0 | 99% |
| BX418564.2 | BX418564 | Homo sapiens FETAL BRAIN Homo sapiens cDNA... | 1868 | 0.0 | 99% |
| BX420340.1 | BX420340 | Homo sapiens FETAL BRAIN Homo sapiens cDNA... | 1866 | 0.0 | 99% |
| BX459625.2 | BX459625 | Homo sapiens FETAL BRAIN Homo sapiens cDNA... | 1860 | 0.0 | 99% |
| AL517685.3 | AL517685 | Homo sapiens NEUROBLASTOMA Homo sapiens cD... | 1845 | 0.0 | 98% |
| BX440303.2 | BX440303 | Homo sapiens FETAL BRAIN Homo sapiens cDNA... | 1845 | 0.0 | 98% |

ALIGNMENTS

|            |      |                                                                                                                                                         |      |
|------------|------|---------------------------------------------------------------------------------------------------------------------------------------------------------|------|
| Query      | 2    | TTTTTCGCAACGGGTTTGCCCGCAGAACACAGGTGTCGTGAAAACCTACCCCTAAAGCCAAATGGGAAGGAAAGACTCATATCAACATTGTCTGTCATTGGACACGTAGATTTCGGCAAGTCCACCACTACTGGCCATCTGATCTATA    | 151  |
| BY794942.2 | 25   | .....                                                                                                                                                   | 155  |
| DC527884.1 | 9    | .....                                                                                                                                                   | 158  |
| Query      | 152  | AATGCGGTGSCATCGACAAAAGAACCATTTGAAAAATTTGAGAAGGAGCTGCTGAGATGGGAAAGGGCTCCTTCAAGTATGCTTTGGTTCAAGGATGGAAAGTCACCCGTAAGGATGGCAATGCCAGTGGAAACCAAGCTGCTTGAGGCTC | 301  |
| BY794942.2 | 689  | .....                                                                                                                                                   | 761  |
| BY794942.2 | 156  | .....G...                                                                                                                                               | 243  |
|            |      |                                                                                                                                                         |      |
|            |      | G                                                                                                                                                       |      |
| DC527884.1 | 692  | .....                                                                                                                                                   | 764  |
| DC527884.1 | 159  | .....G...                                                                                                                                               | 246  |
|            |      |                                                                                                                                                         |      |
|            |      | G                                                                                                                                                       |      |
| BX440470.1 | 1049 | .....K.....                                                                                                                                             | 977  |
| BX442182.2 | 1041 | .....                                                                                                                                                   | 969  |
| BX418589.2 | 1048 | .....K.C.....                                                                                                                                           | 976  |
| BX418564.2 | 1046 | .....                                                                                                                                                   | 975  |
| BX420340.1 | 1042 | .....                                                                                                                                                   | 970  |
| BX459625.2 | 1036 | .....K.A.....                                                                                                                                           | 964  |
| AL517685.3 | 2    | .....                                                                                                                                                   | 74   |
| BX440303.2 | 1044 | .....K.....R.....M.....N.....R.....                                                                                                                     | 974  |
| Query      | 302  | TGGACTGCATCCTACCACCAACTCGTCCAAGTACCAAGCCCTTGGCGCTGCTCTCCAGGATGTCTACAAAATTTGGTGGTATTGGTACTGTTCTCTGTTGGCCGAGTGGAGACTGGTGTCTCAAAACCGGTATGGTGGTCAACCTTTGCTC | 451  |
| BY794942.2 | 762  | .....                                                                                                                                                   | 911  |
| DC527884.1 | 765  | .....                                                                                                                                                   | 914  |
| BX440470.1 | 976  | ..R.....                                                                                                                                                | 827  |
| BX442182.2 | 968  | .....R.....                                                                                                                                             | 819  |
| BX418589.2 | 975  | .....                                                                                                                                                   | 826  |
| BX418564.2 | 974  | .....C.....                                                                                                                                             | 825  |
| BX420340.1 | 969  | ..A.....R.....                                                                                                                                          | 820  |
| BX459625.2 | 963  | .....                                                                                                                                                   | 814  |
| AL517685.3 | 75   | .....                                                                                                                                                   | 224  |
| BX440303.2 | 973  | .....                                                                                                                                                   | 825  |
| Query      | 452  | CAGTCAACGTACAAACGGAAGTAAATCTGTGAAATGCACCATGAAGCTTTGAGTGAAGCTCTTCCCTGGGGACAATGTGGCTTCATGTCAAGAAATGTGTCTGTCAAGGATGTTCTGCTGGTGCACGTTGCTGGTGAAGCAAAATG      | 601  |
| BY794942.2 | 912  | .....                                                                                                                                                   | 1061 |
| DC527884.1 | 915  | .....                                                                                                                                                   | 1064 |
| BX440470.1 | 826  | .....                                                                                                                                                   | 677  |
| BX442182.2 | 818  | .....                                                                                                                                                   | 669  |
| BX418589.2 | 825  | .....                                                                                                                                                   | 676  |
| BX418564.2 | 824  | .....C.....                                                                                                                                             | 675  |
| BX420340.1 | 819  | .....                                                                                                                                                   | 670  |
| BX459625.2 | 813  | .....                                                                                                                                                   | 664  |
| AL517685.3 | 225  | .....                                                                                                                                                   | 374  |
| BX440303.2 | 824  | .....C.....                                                                                                                                             | 675  |
| Query      | 602  | ACCCACCAATGGAAGCAGCTGGCTTCACTGCTCAGGTGATTATCTTGAACCATCCAGGCCAAATAAGCGCCGGCTATGCCCTGTATTGGATTGCCACACGGCTCACATTGCATGCAAGTTTGGCTGAGCTGAAGGAAAAGATTGATCGCCG | 751  |
| BY794942.2 | 1062 | .....                                                                                                                                                   | 1213 |
|            |      |                                                                                                                                                         |      |
|            |      | G                                                                                                                                                       |      |
| DC527884.1 | 1065 | .....                                                                                                                                                   | 1215 |
|            |      |                                                                                                                                                         |      |
|            |      | C                                                                                                                                                       |      |
| BX440470.1 | 676  | .....                                                                                                                                                   | 525  |
|            |      |                                                                                                                                                         |      |
|            |      | C                                                                                                                                                       |      |
| BX442182.2 | 668  | .....                                                                                                                                                   | 518  |
|            |      |                                                                                                                                                         |      |
|            |      | C                                                                                                                                                       |      |
| BX418589.2 | 675  | .....Y.S.....                                                                                                                                           | 525  |
|            |      |                                                                                                                                                         |      |
|            |      | C                                                                                                                                                       |      |
| BX418564.2 | 674  | .....M.....                                                                                                                                             | 524  |
|            |      |                                                                                                                                                         |      |

|            |      |                                                                                                                                                       |   |       |      |
|------------|------|-------------------------------------------------------------------------------------------------------------------------------------------------------|---|-------|------|
| BX420340.1 | 669  | .....                                                                                                                                                 | c | ..... | 519  |
|            |      |                                                                                                                                                       |   |       |      |
|            |      |                                                                                                                                                       | c |       |      |
| BX459625.2 | 663  | .....                                                                                                                                                 |   |       | 513  |
|            |      |                                                                                                                                                       | c |       |      |
| AL517685.3 | 375  | .....                                                                                                                                                 |   |       | 525  |
|            |      |                                                                                                                                                       | c |       |      |
| BX440303.2 | 674  | .....                                                                                                                                                 |   |       | 524  |
|            |      |                                                                                                                                                       | c |       |      |
| Query      | 752  | TTCTGGTAAAAAGCTGGAAGATGGCCCTAAATCTTTGAAGTCTGGTGATGCTGCCATTGTTGATATGGTTCCTGGCAAGCCATGTGTGTGAGAGCTTCTCAGACTATCCACCTTTGGGTCGCTTTTGCTGTTCTGATATGAGACAGACA |   |       | 901  |
| BY794942.2 | 1214 | .....                                                                                                                                                 |   |       | 1364 |
|            |      |                                                                                                                                                       | c |       |      |
| DC527884.1 | 1216 | .....                                                                                                                                                 |   |       | 1366 |
|            |      |                                                                                                                                                       | c |       |      |
| BX440470.1 | 524  | .....                                                                                                                                                 |   |       | 374  |
|            |      |                                                                                                                                                       | c |       |      |
| BX442182.2 | 517  | .....                                                                                                                                                 |   |       | 367  |
|            |      |                                                                                                                                                       | c |       |      |
| BX418589.2 | 524  | .....                                                                                                                                                 |   |       | 374  |
|            |      |                                                                                                                                                       | c |       |      |
| BX418564.2 | 523  | .....                                                                                                                                                 |   |       | 373  |
|            |      |                                                                                                                                                       | c |       |      |
| BX420340.1 | 518  | .....                                                                                                                                                 |   |       | 368  |
|            |      |                                                                                                                                                       | c |       |      |
| BX459625.2 | 512  | .....                                                                                                                                                 |   |       | 362  |
|            |      |                                                                                                                                                       | c |       |      |
| AL517685.3 | 526  | .....M.....                                                                                                                                           |   |       | 676  |
|            |      |                                                                                                                                                       | c |       |      |
| BX440303.2 | 523  | .....                                                                                                                                                 |   |       | 373  |
|            |      |                                                                                                                                                       | c |       |      |
| Query      | 902  | GTTCGGTGGGTGTTCATCAAGCAGTGGACAAGAAGGCTGCTGGAGCTGGCAAGGTCACCAAGTCTGCCAGAAAGCTCAGAAGGCTAAATGAATATTATCCCTAATACCTGCCACCCACTCTTAATCAGTGGTGAAGAACGGTCTCAGA  |   |       | 1051 |
| BY794942.2 | 1365 | .....                                                                                                                                                 |   |       | 1516 |
|            |      |                                                                                                                                                       | c |       |      |
| DC527884.1 | 1367 | .....A.....                                                                                                                                           |   |       | 1518 |
|            |      |                                                                                                                                                       | c |       |      |
| BX440470.1 | 373  | .....                                                                                                                                                 |   |       | 222  |
|            |      |                                                                                                                                                       | c |       |      |
| BX442182.2 | 366  | .....                                                                                                                                                 |   |       | 215  |
|            |      |                                                                                                                                                       | c |       |      |
| BX418589.2 | 373  | .....                                                                                                                                                 |   |       | 222  |
|            |      |                                                                                                                                                       | c |       |      |
| BX418564.2 | 372  | .....                                                                                                                                                 |   |       | 221  |
|            |      |                                                                                                                                                       | c |       |      |



Query= N13-10 [organism=Homo sapiens] eef1a1  
Length=1650

## ALIGNMENTS

|            |      |                                                                                                                                                          |                                                                                                                                          |                                                                                                                               |      |
|------------|------|----------------------------------------------------------------------------------------------------------------------------------------------------------|------------------------------------------------------------------------------------------------------------------------------------------|-------------------------------------------------------------------------------------------------------------------------------|------|
|            |      |                                                                                                                                                          | I<br>C                                                                                                                                   |                                                                                                                               |      |
| Query      | 752  | TCCAAC                                                                                                                                                   | TGACAAGCCCTTGC                                                                                                                           | GCCTGCCTCCAGGATGTCTACAAAATTGGTGGTATTGGTACTGTTCTGTTGCCGAGTGGAGACTGGTGTCTCAAACCCGGTATGGTGGTCACCTTTGCTCCAGTCAACGTTACAATGTGGGCTTC | 901  |
| DC855699.1 | 753  | .....                                                                                                                                                    | .....                                                                                                                                    | .....                                                                                                                         | 876  |
| DC527884.1 | 987  | .....                                                                                                                                                    | .....                                                                                                                                    | .....                                                                                                                         | 1000 |
| DC527884.1 | 790  | .....                                                                                                                                                    | .....                                                                                                                                    | .....                                                                                                                         | 929  |
| BY794942.2 | 984  | .....                                                                                                                                                    | .....                                                                                                                                    | .....                                                                                                                         | 997  |
| BY794942.2 | 787  | .....                                                                                                                                                    | .....                                                                                                                                    | .....                                                                                                                         | 926  |
| CR996969.1 | 17   | .....                                                                                                                                                    | .....                                                                                                                                    | .....                                                                                                                         | 30   |
| CR996534.1 | 86   | .....                                                                                                                                                    | .....                                                                                                                                    | .....                                                                                                                         | 99   |
| CR996534.1 | 1    | .....                                                                                                                                                    | .....                                                                                                                                    | .....                                                                                                                         | 28   |
| CR982215.1 | 29   | .....                                                                                                                                                    | .....                                                                                                                                    | .....                                                                                                                         | 42   |
| BX453401.2 | 40   | .....                                                                                                                                                    | .....                                                                                                                                    | .....                                                                                                                         | 53   |
| BX443032.2 | 166  | .....                                                                                                                                                    | .....                                                                                                                                    | .....                                                                                                                         | 179  |
| BX443032.2 | 1    | .....                                                                                                                                                    | .....                                                                                                                                    | .....                                                                                                                         | 108  |
| BX421307.2 | 140  | .....                                                                                                                                                    | .....                                                                                                                                    | .....                                                                                                                         | 153  |
| BX421307.2 | 23   | .....                                                                                                                                                    | .....                                                                                                                                    | .....                                                                                                                         | 82   |
|            |      |                                                                                                                                                          | \<br>I<br>T                                                                                                                              |                                                                                                                               |      |
| BX353545.2 | 45   | .....                                                                                                                                                    | .....                                                                                                                                    | .....                                                                                                                         | 58   |
| Query      | 902  | AATGTC                                                                                                                                                   | AAGAATGTGTCTGTCAAGGATGTTCTGTCGTGGCAACGTTGCTGGTGACAGCAAAAAATGACCCCAATGGAAGCAGCTGGCTTC                                                     | ACTGCTCAGGTGATTATCCTGAACCATCCAGGCCAAAATAAGCGCCGGTATGCCCTGTGA                                                                  | 1051 |
| DC527884.1 | 1001 | .....                                                                                                                                                    | .....                                                                                                                                    | .....                                                                                                                         | 1150 |
| BY794942.2 | 998  | .....                                                                                                                                                    | .....                                                                                                                                    | .....                                                                                                                         | 1148 |
|            |      |                                                                                                                                                          | \<br>I<br>G                                                                                                                              |                                                                                                                               |      |
| CR996969.1 | 31   | .....                                                                                                                                                    | .....                                                                                                                                    | .....                                                                                                                         | 180  |
| CR996534.1 | 100  | .....                                                                                                                                                    | .....                                                                                                                                    | .....                                                                                                                         | 249  |
| CR982215.1 | 43   | .....                                                                                                                                                    | .....                                                                                                                                    | .....                                                                                                                         | 192  |
| BX453401.2 | 54   | .....                                                                                                                                                    | .....                                                                                                                                    | .....                                                                                                                         | 203  |
| BX443032.2 | 180  | .....                                                                                                                                                    | .....                                                                                                                                    | .....                                                                                                                         | 329  |
| BX421307.2 | 154  | .....                                                                                                                                                    | .....                                                                                                                                    | .....                                                                                                                         | 303  |
| BX353545.2 | 59   | .....                                                                                                                                                    | .....                                                                                                                                    | .....                                                                                                                         | 208  |
| Query      | 1052 | TTGGATTGCC                                                                                                                                               | CACCGCTCACATTCGATGCAAGTTTGGTGAGCTGAAGGAAAAGATTGATCGCCGTTCTGGTAAAAAGCTGGAAGTGGCCCTAAATTTCTTGAAGTCTGGT                                     | GATGCTGCCATTGTTGATATGGTTCCTGGCAAGCCCATG                                                                                       | 1201 |
| DC527884.1 | 1151 | .....                                                                                                                                                    | .....                                                                                                                                    | .....                                                                                                                         | 1300 |
| BY794942.2 | 1149 | .....                                                                                                                                                    | .....                                                                                                                                    | .....                                                                                                                         | 1298 |
| CR996969.1 | 181  | .....                                                                                                                                                    | .....                                                                                                                                    | .....                                                                                                                         | 330  |
| CR996534.1 | 250  | .....                                                                                                                                                    | .....                                                                                                                                    | .....                                                                                                                         | 399  |
| CR982215.1 | 193  | .....                                                                                                                                                    | .....                                                                                                                                    | .....                                                                                                                         | 342  |
| BX453401.2 | 204  | .....                                                                                                                                                    | .....                                                                                                                                    | .....                                                                                                                         | 353  |
| BX443032.2 | 330  | .....                                                                                                                                                    | .....                                                                                                                                    | .....                                                                                                                         | 479  |
| BX421307.2 | 304  | .....                                                                                                                                                    | .....                                                                                                                                    | .....                                                                                                                         | 453  |
| BX353545.2 | 209  | .....                                                                                                                                                    | .....                                                                                                                                    | .....                                                                                                                         | 358  |
| Query      | 1202 | TGTGTTGAGAGCTTCTCAGACTATCCACCTTTGGGTCGCTTTTGCTGTTTCGTGATATGAGACAGACAGTTGCGGTGGGTGTTCATCAAAGCAGTGGACAAGAAGGCTGCTGGAGCTGGCAAGGTACCAAGTCTGCCAGAAAAGCTCAGAAG |                                                                                                                                          |                                                                                                                               | 1351 |
| DC527884.1 | 1301 | .....                                                                                                                                                    | .....                                                                                                                                    | .....                                                                                                                         | 1450 |
| BY794942.2 | 1299 | .....                                                                                                                                                    | .....                                                                                                                                    | .....                                                                                                                         | 1448 |
| CR996969.1 | 331  | .....                                                                                                                                                    | .....                                                                                                                                    | .....                                                                                                                         | 480  |
| CR996534.1 | 400  | .....                                                                                                                                                    | .....                                                                                                                                    | .....                                                                                                                         | 549  |
| CR982215.1 | 343  | .....                                                                                                                                                    | .....                                                                                                                                    | .....                                                                                                                         | 492  |
| BX453401.2 | 354  | .....                                                                                                                                                    | .....                                                                                                                                    | .....                                                                                                                         | 503  |
| BX443032.2 | 480  | .....                                                                                                                                                    | .....                                                                                                                                    | .....                                                                                                                         | 629  |
| BX421307.2 | 454  | .....                                                                                                                                                    | .....                                                                                                                                    | .....                                                                                                                         | 603  |
| BX353545.2 | 359  | .....                                                                                                                                                    | .....                                                                                                                                    | .....                                                                                                                         | 508  |
| Query      | 1352 | GCTAAATGAATATTATCCCTAATACCTGCCACCCCACTCTTAATCAGTGGTGAAGAAGCGTCTCAGAACTGTTTGTGTTCAATTGGCCATTTAAGTTTAGTAGTAAAGACTGGTTAATGATAACAATGCATCGTAAACCTTCAGAAGG     |                                                                                                                                          |                                                                                                                               | 1501 |
| DC527884.1 | 1451 | .....                                                                                                                                                    | .....                                                                                                                                    | .....                                                                                                                         | 1600 |
| BY794942.2 | 1449 | .....                                                                                                                                                    | .....                                                                                                                                    | .....                                                                                                                         | 1598 |
| CR996969.1 | 481  | .....                                                                                                                                                    | .....                                                                                                                                    | .....                                                                                                                         | 630  |
| CR996534.1 | 550  | .....                                                                                                                                                    | .....                                                                                                                                    | .....                                                                                                                         | 699  |
| CR982215.1 | 493  | .....                                                                                                                                                    | .....                                                                                                                                    | .....                                                                                                                         | 642  |
| BX453401.2 | 504  | .....                                                                                                                                                    | .....                                                                                                                                    | .....                                                                                                                         | 653  |
| BX443032.2 | 630  | .....                                                                                                                                                    | .....                                                                                                                                    | .....                                                                                                                         | 779  |
| BX421307.2 | 604  | .....                                                                                                                                                    | .....                                                                                                                                    | .....                                                                                                                         | 753  |
| BX353545.2 | 509  | .....                                                                                                                                                    | .....                                                                                                                                    | .....                                                                                                                         | 658  |
| Query      | 1502 | AAAGGAGAAATgtttt                                                                                                                                         | gtggaccactttgggtttttcttttttgcgtgtggcagttttaagttattagtttttaaaatcagtagctttttaATGGAACAACCTTGACCAAAAATTTGTCACAGAATTTTGAGACCCATTAAAAAGTTAAATG |                                                                                                                               | 1650 |
| DC527884.1 | 1601 | .....                                                                                                                                                    | .....                                                                                                                                    | .....                                                                                                                         | 1749 |
| BY794942.2 | 1599 | .....                                                                                                                                                    | .....                                                                                                                                    | .....                                                                                                                         | 1747 |
| CR996969.1 | 631  | .....                                                                                                                                                    | .....                                                                                                                                    | .....                                                                                                                         | 779  |
| CR996534.1 | 700  | .....                                                                                                                                                    | .....                                                                                                                                    | .....                                                                                                                         | 848  |
| CR982215.1 | 643  | .....                                                                                                                                                    | .....                                                                                                                                    | .....                                                                                                                         | 791  |
| BX453401.2 | 654  | .....                                                                                                                                                    | .....                                                                                                                                    | .....                                                                                                                         | 802  |
| BX443032.2 | 780  | .....                                                                                                                                                    | .....                                                                                                                                    | .....                                                                                                                         | 928  |
| BX421307.2 | 754  | .....                                                                                                                                                    | .....                                                                                                                                    | .....                                                                                                                         | 902  |
| BX353545.2 | 659  | .....                                                                                                                                                    | .....                                                                                                                                    | .....                                                                                                                         | 807  |

Query= N14-17 [organism=Homo sapiens] eef1a1

Length=1118

| Sequences producing significant alignments:                       |                 |            |              |
|-------------------------------------------------------------------|-----------------|------------|--------------|
|                                                                   | Score<br>(Bits) | E<br>Value | Max<br>ident |
| BU845975.1 AGENCOURT_10413042 NIH_MGC_109 Homo sapiens cDNA cl... | 1592            | 0.0        | 100%         |
| BX421307.2 BX421307 Homo sapiens B CELLS (RAMOS CELL LINE) Hom... | 1591            | 0.0        | 100%         |
| BX443032.2 BX443032 Homo sapiens B CELLS (RAMOS CELL LINE) Hom... | 1587            | 0.0        | 100%         |
| BY794942.2 BY794942 Homo sapiens eye Homo sapiens cDNA clone H... | 1585            | 0.0        | 100%         |
| BU192437.1 AGENCOURT_7938567 NIH_MGC_92 Homo sapiens cDNA clon... | 1585            | 0.0        | 100%         |
| BX417098.2 BX417098 Homo sapiens PLACENTA Homo sapiens cDNA cl... | 1583            | 0.0        | 100%         |
| DC527884.1 DC527884 chimpanzee skin cDNA library PstA Pan trog... | 1580            | 0.0        | 100%         |
| BX441194.2 BX441194 Homo sapiens FETAL BRAIN Homo sapiens cDNA... | 1580            | 0.0        | 100%         |
| BQ049312.1 AGENCOURT_6795094 NIH_MGC_85 Homo sapiens cDNA clon... | 1580            | 0.0        | 100%         |
| BM477966.1 AGENCOURT_6482916 NIH_MGC_85 Homo sapiens cDNA clon... | 1580            | 0.0        | 100%         |

ALIGNMENTS

|            |      |                                                                                                                                                       |      |
|------------|------|-------------------------------------------------------------------------------------------------------------------------------------------------------|------|
| Query      | 2    | TTTTTCGCAACGGGTTTGCCGCCAGAACACAGGTGTCGTGAAAACCTACCCCTAAAAAGCAAAATGGGAAAGGAAAAGACTCATATCAACATTGTCGTATTGGACACGTAGATTTCGGGCAAGTCCACCCTACTGGCCATCTGATCTAT | 151  |
| BU794942.2 | 25   | .....                                                                                                                                                 | 154  |
| DC527884.1 | 9    | .....                                                                                                                                                 | 157  |
| Query      | 152  | AAATGCGGTGGCATCGACAAAAAACCATTGAAAAATTTGAGAAGGAGGCTGCTGAGATGGGAAAGGGCTCCTTCAAGTATGCTGGGTCTTGGATAAACTCAAAACCCGGTATGGTGGTCACCTTTGCTCCAGTCAACGTTACAAACGGA | 301  |
| BU845975.1 | 867  | .....N.....                                                                                                                                           | 817  |
| BX421307.2 | 37   | .....                                                                                                                                                 | 86   |
| BX443032.2 | 63   | .....                                                                                                                                                 | 112  |
| BY794942.2 | 881  | .....                                                                                                                                                 | 930  |
| BY794942.2 | 155  | ...G...                                                                                                                                               | 259  |
| BU192437.1 | 8    | .....                                                                                                                                                 | 57   |
| BX417098.2 | 26   | .....                                                                                                                                                 | 75   |
| DC527884.1 | 884  | .....                                                                                                                                                 | 933  |
| DC527884.1 | 158  | ...G...                                                                                                                                               | 262  |
| BX441194.2 | 75   | .....W.....                                                                                                                                           | 124  |
| BQ049312.1 | 35   | .....                                                                                                                                                 | 84   |
| BM477966.1 | 19   | .....                                                                                                                                                 | 68   |
| Query      | 302  | AGTAAATCTGTGAAATGCACCATGAAGCTTTGAGTGAAGCTCTTCTGGGGACAATGTGGGCTTCAATGTCAAGATGTGTCTGTCAGGATGTTCTGCTGGCAACGTTGCTGGTGACAGCAAAAAATGACCCACCAATGGAAGCAGC     | 451  |
| BU845975.1 | 816  | .....                                                                                                                                                 | 667  |
| BX421307.2 | 87   | .....                                                                                                                                                 | 236  |
| BX443032.2 | 113  | ..M.....                                                                                                                                              | 262  |
| BY794942.2 | 931  | .....                                                                                                                                                 | 1080 |
| BU192437.1 | 58   | .....                                                                                                                                                 | 207  |
| BX417098.2 | 76   | .....                                                                                                                                                 | 225  |
| DC527884.1 | 934  | .....                                                                                                                                                 | 1083 |
| BX441194.2 | 125  | .....                                                                                                                                                 | 274  |
| BQ049312.1 | 85   | .....                                                                                                                                                 | 234  |
| BM477966.1 | 69   | .....                                                                                                                                                 | 218  |
| Query      | 452  | TGGCTTCACTGCTCAGGTGATTATCCTGAACCATCCAGGCCAAATAAGCGCCGGCTATGCCCTGTATTGGATTGCCACACGGCTCACATTGCATGCAAGTTTGCTGAGCTGAAGGAAAAGATTGATCGCCGTTCTGGTAAAAAGCTGGA | 601  |
| BU845975.1 | 666  | .....                                                                                                                                                 | 517  |
| BX421307.2 | 237  | .....                                                                                                                                                 | 386  |
| BX443032.2 | 263  | .....                                                                                                                                                 | 412  |
| BY794942.2 | 1081 | .....                                                                                                                                                 | 1231 |
|            |      | \<br> <br>G                                                                                                                                           |      |
| BU192437.1 | 208  | .....                                                                                                                                                 | 357  |
| BX417098.2 | 226  | .....                                                                                                                                                 | 375  |
| DC527884.1 | 1084 | .....                                                                                                                                                 | 1233 |
| BX441194.2 | 275  | .....                                                                                                                                                 | 424  |
| BQ049312.1 | 235  | .....                                                                                                                                                 | 384  |
| BM477966.1 | 219  | .....                                                                                                                                                 | 368  |
| Query      | 602  | AGATGGCCCTAAATTCCTGAAGTCTGGTGATGCTGCCATTGTTGATATGGTTCTTGCAAGCCCATGTGTGTTGAGAGCTTCTCAGACTATCCACCTTTGGGTGCTTTGCTGTTTCGTGATATGAGACAGACAGTTGCGGTGGGTGCAT  | 751  |
| BU845975.1 | 516  | .....                                                                                                                                                 | 367  |
| BX421307.2 | 387  | .....                                                                                                                                                 | 536  |
| BX443032.2 | 413  | .....                                                                                                                                                 | 562  |
| BY794942.2 | 1232 | .....                                                                                                                                                 | 1381 |
| BU192437.1 | 358  | .....                                                                                                                                                 | 507  |
| BX417098.2 | 376  | .....                                                                                                                                                 | 525  |
| DC527884.1 | 1234 | .....A.....                                                                                                                                           | 1383 |
| BX441194.2 | 425  | .....                                                                                                                                                 | 574  |
| BQ049312.1 | 385  | .....                                                                                                                                                 | 534  |
| BM477966.1 | 369  | .....                                                                                                                                                 | 518  |
| Query      | 752  | CAAAGCAGTGGAACAAGAAGGCTGCTGGAGCTGGCAAGGTCACCAAGTCTGCCCAGAAAGCTCAGAAGGCTAAATGAATATTATCCCTAATACCTGCCACCCCACTCTTAATCAGTGGTGAAGAACGGTCTCAGAACTGTTTGTTCAT  | 901  |
| BU845975.1 | 366  | .....                                                                                                                                                 | 217  |
| BX421307.2 | 537  | .....                                                                                                                                                 | 686  |
| BX443032.2 | 563  | .....                                                                                                                                                 | 712  |
| BY794942.2 | 1382 | .....                                                                                                                                                 | 1531 |



|            |      |             |      |
|------------|------|-------------|------|
| BU192437.1 | 508  | .....       | 657  |
| BX417098.2 | 526  | .....       | 675  |
| DC527884.1 | 1384 | .....C..... | 1533 |
| BX441194.2 | 575  | .....       | 724  |
| BQ049312.1 | 535  | .....       | 684  |
| BM477966.1 | 519  | .....       | 668  |

|            |      |                                                                                                                                                  |      |
|------------|------|--------------------------------------------------------------------------------------------------------------------------------------------------|------|
| Query      | 902  | TGGCCATTTAAGTTTAGTAGTAAAGACTGGTTAATGATAACAATGCATCGTAAACCTTCAGAAGGAAGGAGAAATgtttgtggaccacttgggttttttttgcgtgtggcagtttaagttattagtttttaaaatcagttactt | 1051 |
| BU845975.1 | 216  | .....                                                                                                                                            | 67   |
| BX421307.2 | 687  | .....                                                                                                                                            | 836  |
| BX443032.2 | 713  | .....                                                                                                                                            | 862  |
| BY794942.2 | 1532 | .....                                                                                                                                            | 1681 |
| BU192437.1 | 658  | .....A.....                                                                                                                                      | 807  |
| BX417098.2 | 676  | .....                                                                                                                                            | 825  |
| DC527884.1 | 1534 | .....                                                                                                                                            | 1683 |
| BX441194.2 | 725  | .....                                                                                                                                            | 874  |
| BQ049312.1 | 685  | .....                                                                                                                                            | 834  |
| BM477966.1 | 669  | .....-                                                                                                                                           | 817  |

|            |      |                                                                    |      |
|------------|------|--------------------------------------------------------------------|------|
| Query      | 1052 | tttaATGGAACAACCTTGACCAAAAATTTGTCACAGAATTTTGAGACCCATTaaaaaaGTTAAATG | 1118 |
| BU845975.1 | 66   | .....-                                                             | 1    |
| BX421307.2 | 837  | .....-                                                             | 902  |
| BX443032.2 | 863  | .....-                                                             | 928  |
| BY794942.2 | 1682 | .....-                                                             | 1747 |
| BU192437.1 | 808  | .....C.....                                                        | 874  |
| BX417098.2 | 826  | .....-                                                             | 890  |
| DC527884.1 | 1684 | .....                                                              | 1749 |
| BX441194.2 | 875  | .....                                                              | 939  |
| BQ049312.1 | 835  | .....T.....                                                        | 901  |

\\  
|  
A

|            |     |              |     |
|------------|-----|--------------|-----|
| BM477966.1 | 818 | .....N.....- | 883 |
|------------|-----|--------------|-----|

Query= N15-19 [organism=Homo sapiens] eef1a1

Length=933

|                                             |                                                        | Score  | E     | Max   |
|---------------------------------------------|--------------------------------------------------------|--------|-------|-------|
| Sequences producing significant alignments: |                                                        | (Bits) | Value | ident |
| DC635691.1                                  | DC635691 macaque bone marrow cDNA library QbmA Maca... | 1150   | 0.0   | 97%   |
| BQ005659.1                                  | UI-H-ED0-ayr-1-05-0-UI.s1 NCI CGAP ED0 Homo sapiens... | 1153   | 0.0   | 100%  |
| BM997474.1                                  | UI-H-DH0-aug-1-16-0-UI.s1 NCI CGAP DH0 Homo sapiens... | 1153   | 0.0   | 100%  |
| CT005089.1                                  | CT005089 RZPD no.9017 Homo sapiens cDNA clone RZPDp... | 1151   | 0.0   | 100%  |
| CR999820.1                                  | CR999820 RZPD no.9017 Homo sapiens cDNA clone RZPDp... | 1151   | 0.0   | 100%  |
| CR999128.1                                  | CR999128 RZPD no.9017 Homo sapiens cDNA clone RZPDp... | 1151   | 0.0   | 100%  |
| CR996969.1                                  | CR996969 RZPD no.9017 Homo sapiens cDNA clone RZPDp... | 1151   | 0.0   | 100%  |
| CR996534.1                                  | CR996534 RZPD no.9017 Homo sapiens cDNA clone RZPDp... | 1151   | 0.0   | 100%  |
| CR989971.1                                  | CR989971 RZPD no.9017 Homo sapiens cDNA clone RZPDp... | 1151   | 0.0   | 100%  |
| CR987376.1                                  | CR987376 RZPD no.9017 Homo sapiens cDNA clone RZPDp... | 1151   | 0.0   | 100%  |

# ALIGNMENTS

|            |   |                                                                                                                                                    |     |
|------------|---|----------------------------------------------------------------------------------------------------------------------------------------------------|-----|
| Query      | 1 | CTTTTCGCAACGGGTTTGCCGCCAGACACAGGTGTCGTGAAAACCTACCCCTAAAAGCCAAAATGGGAAGGAAAAGACTCATATCAACATTGTCGTGATTGGACACGTAGATTGGGCAAGTCCACCACTACTGCCATCTGATCTAT | 150 |
| DC635691.1 | 1 | .....-.....                                                                                                                                        | 149 |

|            |     |                                                                                                                                                        |     |
|------------|-----|--------------------------------------------------------------------------------------------------------------------------------------------------------|-----|
| Query      | 151 | AAATCGCGTGGCATCGACAAAAGAACCATTGAAAAAATTTGAGAAGGAGGCTGCTGAGATGGGAAGGGCTCCTTCAAGTATGCCTGGGTCTTGGATAAACTGAAAGCTGAGCGTGAACGTGGTATCACCATTGATATCTCCTTGTGGAAA | 300 |
| DC635691.1 | 150 | .....G.....                                                                                                                                            | 299 |

|            |     |                                                                                                                                                     |     |
|------------|-----|-----------------------------------------------------------------------------------------------------------------------------------------------------|-----|
| Query      | 301 | TTTGAGACCAAATAAGCGCCTGCTATGCCCTGTATTGGATTGCCACACGCTCACATTGCATGCAAGTTTGCTGAGCTGAAGGAAAAGATTGATCGCCGTTCTGGTAAAAAGCTGGAAGATGGCCCTAAATCTTGAAGTCTGGTGATG | 450 |
| DC635691.1 | 300 | .....T.A..T.....G.....A.....A.....                                                                                                                  | 459 |

\\ \\ \\ \\ \\ \\ \\ \\  
| | | | | | | |  
GC G TT A AT  
|  
T G

|            |     |                |     |
|------------|-----|----------------|-----|
| BQ005659.1 | 648 | ..N.....G..... | 503 |
| BM997474.1 | 648 | ..N.....G..... | 503 |
| CT005089.1 | 45  | ..G.....G..... | 190 |
| CR999820.1 | 3   | ..G.....G..... | 148 |
| CR999128.1 | 117 | ..G.....G..... | 262 |
| CR996969.1 | 150 | ..G.....G..... | 295 |
| CR996534.1 | 219 | ..G.....G..... | 364 |
| CR989971.1 | 75  | ..G.....G..... | 220 |
| CR987376.1 | 12  | ..G.....G..... | 157 |

|            |     |                                                                                                                                                     |     |
|------------|-----|-----------------------------------------------------------------------------------------------------------------------------------------------------|-----|
| Query      | 451 | CTGCCATTGTTGATATGGTTCCTGGCAAGCCCATGTGTGTTGAGAGCTTCTCAGACTATCCACCTTTGGGTGCTTGTGCTGTCGTGATATGAGACAGAGTTGCGGTGGGTGTCATCAAAGCAGTGGACAAGAAGGCTGCTGGAGCTG | 600 |
| DC635691.1 | 460 | .....T.....G.....                                                                                                                                   | 609 |
| BQ005659.1 | 502 | .....                                                                                                                                               | 353 |
| BM997474.1 | 502 | .....                                                                                                                                               | 353 |

|            |     |       |     |
|------------|-----|-------|-----|
| CT005089.1 | 191 | ..... | 340 |
| CR999820.1 | 149 | ..... | 298 |
| CR999128.1 | 263 | ..... | 412 |
| CR996969.1 | 296 | ..... | 445 |
| CR996534.1 | 365 | ..... | 514 |
| CR989971.1 | 221 | ..... | 370 |
| CR987376.1 | 158 | ..... | 307 |

|            |     |                                                                                                                                                  |     |
|------------|-----|--------------------------------------------------------------------------------------------------------------------------------------------------|-----|
| Query      | 601 | GCAAGGTACCAAGTCTGCCAGAAAGCTCAGAAGGCTAAATGAATATTATCCCTAATACCTGCCACCCCACTCTTAATCAGTGGTGAAGAACGGTCTCAGAACTGTTTGTTCATTTGCCATTTAAGTTTAGTAGTAAAGACTGGT | 750 |
| DC635691.1 | 610 | .....                                                                                                                                            | 759 |
| BQ005659.1 | 352 | .....                                                                                                                                            | 203 |
| BM997474.1 | 352 | .....                                                                                                                                            | 203 |
| CT005089.1 | 341 | .....                                                                                                                                            | 490 |
| CR999820.1 | 299 | .....                                                                                                                                            | 448 |
| CR999128.1 | 413 | .....                                                                                                                                            | 562 |
| CR996969.1 | 446 | .....                                                                                                                                            | 595 |
| CR996534.1 | 515 | .....                                                                                                                                            | 664 |
| CR989971.1 | 371 | .....                                                                                                                                            | 520 |
| CR987376.1 | 308 | .....                                                                                                                                            | 457 |

|            |     |                                                                                                                                                     |     |
|------------|-----|-----------------------------------------------------------------------------------------------------------------------------------------------------|-----|
| Query      | 751 | TAATGATAACAATGCATCGTAAACCTTCAGAAGGAAGGAGAATgttttgggaccactttgggtttcttttttgcgtgtggcagttttaagttattagtttttaaaatcagtagtttttaATGGAACAACCTTGACCAAAAATTTGTC | 900 |
| DC635691.1 | 760 | .....                                                                                                                                               | 904 |
| BQ005659.1 | 202 | .....                                                                                                                                               | 53  |
| BM997474.1 | 202 | .....                                                                                                                                               | 53  |
| CT005089.1 | 491 | .....                                                                                                                                               | 640 |
| CR999820.1 | 449 | .....                                                                                                                                               | 598 |
| CR999128.1 | 563 | .....                                                                                                                                               | 712 |
| CR996969.1 | 596 | .....                                                                                                                                               | 745 |
| CR996534.1 | 665 | .....                                                                                                                                               | 814 |
| CR989971.1 | 521 | .....                                                                                                                                               | 670 |
| CR987376.1 | 458 | .....                                                                                                                                               | 607 |

|            |     |                                  |     |
|------------|-----|----------------------------------|-----|
| Query      | 901 | ACAGAATTTTGAGACCCATTAAAAAGTTAAAT | 933 |
| DC635691.1 | 905 | .....                            | 929 |
| BQ005659.1 | 52  | .....                            | 20  |
| BM997474.1 | 52  | .....                            | 20  |
| CT005089.1 | 641 | .....                            | 673 |
| CR999820.1 | 599 | .....                            | 631 |
| CR999128.1 | 713 | .....                            | 745 |
| CR996969.1 | 746 | .....                            | 778 |
| CR996534.1 | 815 | .....                            | 847 |
| CR989971.1 | 671 | .....                            | 703 |
| CR987376.1 | 608 | .....                            | 640 |

Query= N16-18 [organism=Homo sapiens] eef1a1

Length=970

| Sequences producing significant alignments: |          |              |                                         | Score<br>(Bits) | E<br>Value | Max<br>ident |
|---------------------------------------------|----------|--------------|-----------------------------------------|-----------------|------------|--------------|
| CR999128.1                                  | CR999128 | RZPD         | no.9017 Homo sapiens cDNA clone RZPD... | 1247            | 0.0        | 100%         |
| CR996969.1                                  | CR996969 | RZPD         | no.9017 Homo sapiens cDNA clone RZPD... | 1247            | 0.0        | 100%         |
| CR996534.1                                  | CR996534 | RZPD         | no.9017 Homo sapiens cDNA clone RZPD... | 1247            | 0.0        | 100%         |
| CR989971.1                                  | CR989971 | RZPD         | no.9017 Homo sapiens cDNA clone RZPD... | 1247            | 0.0        | 100%         |
| CR982215.1                                  | CR982215 | RZPD         | no.9016 Homo sapiens cDNA clone RZPD... | 1247            | 0.0        | 100%         |
| CR977084.1                                  | CR977084 | RZPD         | no.9016 Homo sapiens cDNA clone RZPD... | 1247            | 0.0        | 100%         |
| BX453401.2                                  | BX453401 | Homo sapiens | T CELLS (JURKAT CELL LINE) Ho...        | 1247            | 0.0        | 100%         |
| BX453399.2                                  | BX453399 | Homo sapiens | T CELLS (JURKAT CELL LINE) Ho...        | 1247            | 0.0        | 100%         |
| BX443032.2                                  | BX443032 | Homo sapiens | B CELLS (RAMOS CELL LINE) Hom...        | 1247            | 0.0        | 100%         |
| BX426531.2                                  | BX426531 | Homo sapiens | T CELLS (JURKAT CELL LINE) Ho...        | 1247            | 0.0        | 100%         |

# ALIGNMENTS

|            |     |                                                                                                                                                      |     |
|------------|-----|------------------------------------------------------------------------------------------------------------------------------------------------------|-----|
| Query      | 296 | TGGAAGCAGCTGGCTTCACTGCTCAGTGATTATCCTGAACCATCCAGGCCAAATAAGCGCCGGCTATGCCCTGTATTGGATTGCCACACGGCTCACATTGCATGCAAGTTTGCTGAGCTGAAGGAAAAGATTGATCGCCGTTCTGGTA | 445 |
| CR999128.1 | 71  | .....                                                                                                                                                | 220 |
| CR996969.1 | 104 | .....                                                                                                                                                | 253 |
| CR996534.1 | 173 | .....                                                                                                                                                | 322 |
| CR989971.1 | 29  | .....                                                                                                                                                | 178 |
| CR982215.1 | 116 | .....                                                                                                                                                | 265 |
| CR977084.1 | 62  | .....                                                                                                                                                | 211 |
| BX453401.2 | 127 | .....                                                                                                                                                | 276 |
| BX453399.2 | 681 | .....                                                                                                                                                | 532 |
| BX443032.2 | 253 | .....                                                                                                                                                | 402 |
| BX426531.2 | 72  | .....                                                                                                                                                | 221 |

|            |     |                                                                                                                                                         |     |
|------------|-----|---------------------------------------------------------------------------------------------------------------------------------------------------------|-----|
| Query      | 446 | AAAAGCTGGAAGATGGCCCTAAATTTCTTGAAGTCTGGTGATGCTGCCATTGTTGATATGGTTCTTGGCAAGCCCATGTGTGTTGAGAGCTTCTCAGACTATCCACCTTTGGGTGCTTTGCTGTTCTGTGATATGAGACAGACAGTTGCGG | 595 |
| CR999128.1 | 221 | .....                                                                                                                                                   | 370 |
| CR996969.1 | 254 | .....                                                                                                                                                   | 403 |
| CR996534.1 | 323 | .....                                                                                                                                                   | 472 |
| CR989971.1 | 179 | .....                                                                                                                                                   | 328 |

|            |     |       |     |
|------------|-----|-------|-----|
| CR982215.1 | 266 | ..... | 415 |
| CR977084.1 | 212 | ..... | 361 |
| BX453401.2 | 277 | ..... | 426 |
| BX453399.2 | 531 | ..... | 382 |
| BX443032.2 | 403 | ..... | 552 |
| BX426531.2 | 222 | ..... | 371 |

|            |     |                                                                                                                                                     |     |
|------------|-----|-----------------------------------------------------------------------------------------------------------------------------------------------------|-----|
| Query      | 596 | TGGGTGTCATCAAAGCAGTGGACAAGAAGGCTGCTGGAGCTGGCAAGGTACCAAGTCTGCCAGAAAGCTCAGAAGGCTAAATGAATATTATCCCTAATACCTGCCACCCCACTCTTAATCAGTGGTGAAGAACGGTCTCAGAACTGT | 745 |
| CR999128.1 | 371 | .....                                                                                                                                               | 520 |
| CR996969.1 | 404 | .....                                                                                                                                               | 553 |
| CR996534.1 | 473 | .....                                                                                                                                               | 622 |
| CR989971.1 | 329 | .....                                                                                                                                               | 478 |
| CR982215.1 | 416 | .....                                                                                                                                               | 565 |
| CR977084.1 | 362 | .....                                                                                                                                               | 511 |
| BX453401.2 | 427 | .....                                                                                                                                               | 576 |
| BX453399.2 | 381 | .....                                                                                                                                               | 232 |
| BX443032.2 | 553 | .....                                                                                                                                               | 702 |
| BX426531.2 | 372 | .....                                                                                                                                               | 521 |

|            |     |                                                                                                                                                    |     |
|------------|-----|----------------------------------------------------------------------------------------------------------------------------------------------------|-----|
| Query      | 746 | TGTTTCAATTGGCCATTTAAGTTTAGTAGTAAAGACTGGTTAATGATAACAATGCATCGTAAACCTTCAGAAGGAAAGAGAAATgttttgggaccactttgggtttcttttttgcgtgtggcagttttaagttattagtttttaaa | 895 |
| CR999128.1 | 521 | .....                                                                                                                                              | 670 |
| CR996969.1 | 554 | .....                                                                                                                                              | 703 |
| CR996534.1 | 623 | .....                                                                                                                                              | 772 |
| CR989971.1 | 479 | .....                                                                                                                                              | 628 |
| CR982215.1 | 566 | .....                                                                                                                                              | 715 |
| CR977084.1 | 512 | .....                                                                                                                                              | 661 |
| BX453401.2 | 577 | .....                                                                                                                                              | 726 |
| BX453399.2 | 231 | .....                                                                                                                                              | 82  |
| BX443032.2 | 703 | .....                                                                                                                                              | 852 |
| BX426531.2 | 522 | .....                                                                                                                                              | 671 |

|            |     |                                                                               |     |
|------------|-----|-------------------------------------------------------------------------------|-----|
| Query      | 896 | atcagtagcttttttaATGGAAACAACCTTGACCAAAAATTTGTACAGAAATTTTGAGACCCATTAAAAAGTTAAAT | 970 |
| CR999128.1 | 671 | .....                                                                         | 745 |
| CR996969.1 | 704 | .....                                                                         | 778 |
| CR996534.1 | 773 | .....                                                                         | 847 |
| CR989971.1 | 629 | .....                                                                         | 703 |
| CR982215.1 | 716 | .....                                                                         | 790 |
| CR977084.1 | 662 | .....                                                                         | 736 |
| BX453401.2 | 727 | .....                                                                         | 801 |
| BX453399.2 | 81  | .....                                                                         | 7   |
| BX443032.2 | 853 | .....                                                                         | 927 |
| BX426531.2 | 672 | .....                                                                         | 746 |

Query= N17-21 [organism=Homo sapiens] eeflal

Length=1093

| Sequences producing significant alignments:                       | Score<br>(Bits) | E<br>Value | Max<br>ident |
|-------------------------------------------------------------------|-----------------|------------|--------------|
| CA442866.1 UI-H-DP0-avr-n-20-0-UI.s1 NCI_CGAP_Fs1 Homo sapiens... | 1247            | 0.0        | 100%         |
| CA417999.1 UI-H-FH0-bcc-k-24-0-UI.s1 NCI_CGAP_FH0 Homo sapiens... | 1247            | 0.0        | 100%         |
| CA414363.1 UI-H-EZ0-bas-d-03-0-UI.s1 NCI_CGAP_Ch1 Homo sapiens... | 1247            | 0.0        | 100%         |
| CX758265.1 AGENCOURT_41351531 NIH_MGC_278 Homo sapiens cDNA cl... | 1245            | 0.0        | 100%         |
| CT005089.1 CT005089 RZPD no.9017 Homo sapiens cDNA clone RZPDp... | 1243            | 0.0        | 100%         |
| CR999128.1 CR999128 RZPD no.9017 Homo sapiens cDNA clone RZPDp... | 1243            | 0.0        | 100%         |
| CR996969.1 CR996969 RZPD no.9017 Homo sapiens cDNA clone RZPDp... | 1243            | 0.0        | 100%         |
| CR996534.1 CR996534 RZPD no.9017 Homo sapiens cDNA clone RZPDp... | 1243            | 0.0        | 100%         |
| CR989971.1 CR989971 RZPD no.9017 Homo sapiens cDNA clone RZPDp... | 1243            | 0.0        | 100%         |
| CR982215.1 CR982215 RZPD no.9016 Homo sapiens cDNA clone RZPDp... | 1243            | 0.0        | 100%         |

# ALIGNMENTS

|            |     |                                                                                                                                                        |     |
|------------|-----|--------------------------------------------------------------------------------------------------------------------------------------------------------|-----|
| Query      | 416 | AATTTGAAGCAGCTGGCTTCACGTGCTCAGGTGATTTATCTGAACCATCCAGGCCAAATAAGCGCCGGCTATGCCCTGTATTGGATTGCCACACGGCTCACATTGCATGCAAGTTTGCTGAGCTGAAGGAAAAGATTGATCGCCGTTCTG | 565 |
| CA442866.1 | 697 | ...G.....                                                                                                                                              | 548 |
| CA417999.1 | 697 | ...G.....                                                                                                                                              | 548 |
| CA414363.1 | 699 | ...G.....                                                                                                                                              | 550 |
| CX758265.1 | 704 | .....                                                                                                                                                  | 559 |
| CT005089.1 | 1   | .....                                                                                                                                                  | 145 |
| CR999128.1 | 73  | .....                                                                                                                                                  | 217 |
| CR996969.1 | 106 | .....                                                                                                                                                  | 250 |
| CR996534.1 | 175 | .....                                                                                                                                                  | 319 |
| CR989971.1 | 31  | .....                                                                                                                                                  | 175 |
| CR982215.1 | 118 | .....                                                                                                                                                  | 262 |
| Query      | 566 | GTA AAAAGCTGGAAGATGGCCCTAAATTCTTGAAGTCTGGTGATGCTGCCATTGTTGATATGGTTCCTGGCAAGCCCATGTGTGTTGAGAGCTTCTCAGACTATCCACCTTTGGGTCGCTTTGCTGTTCTGTATGAGACAGACAGTTG  | 715 |
| CA442866.1 | 547 | .....                                                                                                                                                  | 398 |
| CA417999.1 | 547 | .....                                                                                                                                                  | 398 |
| CA414363.1 | 549 | .....                                                                                                                                                  | 400 |
| CX758265.1 | 558 | .....                                                                                                                                                  | 409 |
| CT005089.1 | 146 | .....                                                                                                                                                  | 295 |

|            |     |                                                                                                                                                    |      |
|------------|-----|----------------------------------------------------------------------------------------------------------------------------------------------------|------|
| Query      | 866 | TGTTTGTTTCAATTGGCCATTAAAGTAGTAGTAAAGACTGGTTAATGATAACAATGCATCGTAAACCTTCAGAGGAAGGAGAAATgttttgtggaccactttggttttcttttttgcgtgtggcagttttaagtattatagttttt | 1015 |
| CA442866.1 | 247 | .....                                                                                                                                              | 98   |
| CA417999.1 | 247 | .....                                                                                                                                              | 98   |
| CA414363.1 | 249 | .....                                                                                                                                              | 100  |
| CX758265.1 | 258 | .....                                                                                                                                              | 109  |
| CT005089.1 | 446 | .....                                                                                                                                              | 595  |
| CR999128.1 | 518 | .....                                                                                                                                              | 667  |
| CR996969.1 | 551 | .....                                                                                                                                              | 700  |
| CR996534.1 | 620 | .....                                                                                                                                              | 769  |
| CR989971.1 | 476 | .....                                                                                                                                              | 625  |
| CR982215.1 | 563 | .....                                                                                                                                              | 712  |

Query= N18-C\* [organism=Homo sapiens] eef1a1

Length=1742

## ALIGNMENTS

[illegible]

|            |      |                                                                                                                                                           |      |
|------------|------|-----------------------------------------------------------------------------------------------------------------------------------------------------------|------|
| Query      | 303  | TTTGAGACCAGCAAGTACTATGTGACTATCATTGATGCCCCAGGACACAGAGACCTTTATCAAAAAATGATTACAGGGACATCTCAGGCTGACTGTGCTGTCTGATTGTTGCTGCTGGTGTGGTGAATTTGAAGCTGGTATCTCCAAG      | 452  |
| DC527884.1 | 308  | .....C.....                                                                                                                                               | 457  |
| BY794942.2 | 305  | .....                                                                                                                                                     | 454  |
| CF111220.1 | 301  | .....C...G...G...C.....C.....G.....                                                                                                                       | 450  |
| CO001006.1 | 1464 | .....T..C.....C.....C.....C.....                                                                                                                          | 1318 |
| BX426150.2 | 276  | .....C.....                                                                                                                                               | 425  |
| BU902062.1 | 287  | .....                                                                                                                                                     | 436  |
| Query      | 453  | AATGGGCAGACCCGAGAGCATGCCCTCTCGGCTTACACACTGGGTGTGAACAACTAATTGTGGTGTAAACAAATGGATTCCACTGAGCCACCCCTACAGCCAGAGATATGAGGAATTTGTAAGGAAGTCAGCACTTACATTAAG          | 602  |
| DC527884.1 | 458  | .....                                                                                                                                                     | 607  |
| BY794942.2 | 455  | .....                                                                                                                                                     | 604  |
| CF111220.1 | 451  | ..C.....T.....T.....TT.....G.....T.....C.....A.....T.....C.....C.....C.....                                                                               | 600  |
| BX426149.2 | 1196 | .....-A.....-A.....G.....                                                                                                                                 | 1122 |
| CO001006.1 | 1317 | ..C.....T.....C.....T..C.....T.....T.....C.....C.....C.....                                                                                               | 1168 |
| BX418564.2 | 1196 | .....-.....-.....-.....YH.VS...-R.....-W...-G...W...-R.....M.....K...-R.....                                                                              | 1125 |
| BX426150.2 | 426  | .....                                                                                                                                                     | 575  |
| AL567209.3 | 1145 | .....S.....-W...-K.W.....R.....-A.M.....                                                                                                                  | 1092 |
| BU902062.1 | 437  | .....M.....                                                                                                                                               | 586  |
| BX440470.1 | 1128 | .....                                                                                                                                                     | 1125 |
| Query      | 603  | AAAAATTGGCTACAACCCCGACACAGTAGCAATTTGTGCCAATTTCTGGTTGGAATGGTGACAAACATGCTGGAGCCAAGTGCTAACATGCCTTGGTTCAAGGGATGGAAGTCACCCGTAAGGATGGCAATGCCAGTGGAAACCCAGCTGCTT | 752  |
| DC527884.1 | 608  | .....                                                                                                                                                     | 757  |
| BY794942.2 | 605  | .....                                                                                                                                                     | 754  |
| CF111220.1 | 601  | .....T.....G.....C..A.....G.....C.....G.....                                                                                                              | 750  |
| BX426149.2 | 1121 | .....                                                                                                                                                     | 972  |
| CO001006.1 | 1167 | .....C.....T.....A.....C.....C.....C.....                                                                                                                 | 1018 |
| BX418564.2 | 1124 | .....S.....-R.....-.....C.....-.....                                                                                                                      | 982  |
| BX426150.2 | 576  | .....                                                                                                                                                     | 725  |
| AL567209.3 | 1091 | C.....C.....                                                                                                                                              | 942  |
| BU902062.1 | 587  | .....                                                                                                                                                     | 736  |
| BX440470.1 | 1124 | .....-W...-S.M...Y...-K.....-.....K.....                                                                                                                  | 984  |
| Query      | 753  | GAGGCTCTGGACTGCATCCTACCACCAACTCGTCCAACCTGACAAGCCCTTGCGCCTGCCTCTCCAGGATGTCTACAAAATTGGTGGTATTGGTACTGTTCTCTGTTGGCCGAGTGGAGACTGGTGTTCACAAACCCGGTATGGTGGTCACC  | 902  |
| DC527884.1 | 758  | .....                                                                                                                                                     | 907  |
| BY794942.2 | 755  | .....                                                                                                                                                     | 904  |
| CF111220.1 | 751  | ..A..T.....T..G..G.....TC..A..C.....T.....C..C.....C.....G.....A.....T.....T.....                                                                         | 900  |
| BX426149.2 | 971  | .....                                                                                                                                                     | 822  |
| CO001006.1 | 1017 | ..A.....T.....G.....C.....A.....TT.....T.....A.....G..T..T.....T..C.....                                                                                  | 868  |
| BX418564.2 | 981  | .....C.....                                                                                                                                               | 832  |
| BX426150.2 | 726  | .....                                                                                                                                                     | 875  |
| AL567209.3 | 941  | .....K.....                                                                                                                                               | 792  |
| BU902062.1 | 737  | .....                                                                                                                                                     | 886  |
| BX440470.1 | 983  | .....R.....                                                                                                                                               | 834  |
| Query      | 903  | TTTGCTCCAGTCAACGTTTACAACGGAAGTAAAACTGTGCAAAATGCACCATGAAGCTTTGAGTGAAGCTCTTCTGGGGACAATGTGGGCTCAATGTCAAGAATGTGTCTGTCAGGATGTTCTGTCGTGGCAACGTTGCTGGTGACAGC     | 1052 |
| DC527884.1 | 908  | .....                                                                                                                                                     | 1057 |
| BY794942.2 | 905  | .....                                                                                                                                                     | 1054 |
| CF111220.1 | 901  | .....T..A.....T.....C..G...G.....G.....A.....C..A.....C.....A..C...A.A.....T.....G.....                                                                   | 1050 |
| BX426149.2 | 821  | .....                                                                                                                                                     | 672  |
| CO001006.1 | 867  | .....C.....T..A.....T..G..G..C..A.....C.....C.....A.....C.....T..G.....                                                                                   | 718  |
| BX418564.2 | 831  | .....                                                                                                                                                     | 682  |
| BX426150.2 | 876  | .....                                                                                                                                                     | 1024 |
| AL567209.3 | 791  | .....G.....                                                                                                                                               | 642  |
| BU902062.1 | 887  | .....AC.....C..C.....C..C.....                                                                                                                            | 1036 |
| BX440470.1 | 833  | .....G.....                                                                                                                                               | 684  |
| Query      | 1053 | AAAAATGACCACCAATGGAAGCAGCTGGCTTCACTGCTCAGGTGATTATCTGTAACCATCCAGGCCAATAAGCGCCGGCTATGCCCTGTATTGGATTGCCACACGGCTCACATTGCATGCAAGTTTGCTGAGCTGAAGGAAAAGATT       | 1202 |
| DC527884.1 | 1058 | .....                                                                                                                                                     | 1207 |
| BY794942.2 | 1055 | .....                                                                                                                                                     | 1205 |
| CF111220.1 | 1051 | .....G..C..T..T.....TC...C.....C.....A.....C.....T..A..G...C.....                                                                                         | 1200 |
| BX426149.2 | 671  | .....T.....C.....T.....C..A.....T.....C..T..G..A...A...GC.....T...A.....T.....G.....                                                                      | 522  |
| CO001006.1 | 717  | .....                                                                                                                                                     | 568  |
| BX418564.2 | 681  | .....                                                                                                                                                     | 532  |
| BX426150.2 | 1025 | .....                                                                                                                                                     | 1140 |
| AL567209.3 | 641  | .....                                                                                                                                                     | 493  |
| BU902062.1 | 1037 | .....C.G...-.....T.....G.....-A.....C..G..T...-.....                                                                                                      | 1163 |



## ALIGNMENTS

[illegible]

|            |      |                                                                                                                                    |      |
|------------|------|------------------------------------------------------------------------------------------------------------------------------------|------|
| BX443032.2 | 507  | .....                                                                                                                              | 656  |
| BX412224.1 | 424  | .....                                                                                                                              | 275  |
| BY794942.2 | 1326 | .....                                                                                                                              | 1475 |
| BX441194.2 | 519  | .....                                                                                                                              | 668  |
| BX417098.2 | 470  | .....                                                                                                                              | 619  |
| BU844361.1 | 431  | .....                                                                                                                              | 282  |
|            |      |                                                                                                                                    |      |
| Query      | 1221 | GCCACCCACTCTTAATCAGTGGTGGGAAGACGGTCTCAGAACTGTTGTTTCAATTGGCCATTTAAGTTTAGTAGTAAAAAGACTGGTTAATGATAACAATGCATCGTAAACCTTCAGAAGGAAAGGAGAA | 1370 |
| CR996534.1 | 577  | .....                                                                                                                              | 726  |
| BX421307.2 | 631  | .....                                                                                                                              | 780  |
| CX167214.1 | 274  | .....                                                                                                                              | 125  |
| BU845975.1 | 272  | .....                                                                                                                              | 123  |
| BX443032.2 | 657  | .....                                                                                                                              | 806  |
| BX412224.1 | 274  | .....                                                                                                                              | 125  |
| BY794942.2 | 1476 | .....                                                                                                                              | 1625 |
| BX441194.2 | 669  | .....                                                                                                                              | 818  |
| BX417098.2 | 620  | .....                                                                                                                              | 769  |
| BU844361.1 | 281  | .....                                                                                                                              | 132  |
|            |      |                                                                                                                                    |      |
| Query      | 1371 | ggttttcttttttgcggtgtggcagttttaagttattagtttttaaaatcagttcttttaATGGAAACAACCTTGACCAAAAAATTTGTCACAGAATTTTGAGACCCATTAAAAAGTTAAAT         | 1492 |
| CR996534.1 | 727  | .....                                                                                                                              | 847  |
| BX421307.2 | 781  | .....                                                                                                                              | 901  |
| CX167214.1 | 124  | .....                                                                                                                              | 4    |
| BU845975.1 | 122  | .....                                                                                                                              | 2    |
| BX443032.2 | 807  | .....                                                                                                                              | 927  |
| BX412224.1 | 124  | .....                                                                                                                              | 3    |
|            |      |                                                                                                                                    |      |
| BY794942.2 | 1626 | .....                                                                                                                              | 1746 |
| BX441194.2 | 819  | .....                                                                                                                              | 938  |
| BX417098.2 | 770  | .....                                                                                                                              | 889  |
| BU844361.1 | 131  | .....                                                                                                                              | 11   |

Query= N20-6 [organism=Homo sapiens] eef1a1

Length=1602

|                                                                   | Score<br>(Bits) | E<br>Value | Max<br>ident |
|-------------------------------------------------------------------|-----------------|------------|--------------|
| Sequences producing significant alignments:                       |                 |            |              |
| BY794942.2 BY794942 Homo sapiens eye Homo sapiens cDNA clone H... | 1873            | 0.0        | 100%         |
| DC527884.1 DC527884 chimpanzee skin cDNA library PstA Pan trog... | 1866            | 0.0        | 100%         |
| BX418589.2 BX418589 Homo sapiens FETAL BRAIN Homo sapiens cDNA... | 1853            | 0.0        | 100%         |
| BX440470.1 BX440470 Homo sapiens FETAL BRAIN Homo sapiens cDNA... | 1853            | 0.0        | 100%         |
| BX442182.2 BX442182 Homo sapiens FETAL BRAIN Homo sapiens cDNA... | 1849            | 0.0        | 100%         |
| AL541984.3 AL541984 Homo sapiens PLACENTA Homo sapiens cDNA cl... | 1845            | 0.0        | 99%          |
| BX418564.2 BX418564 Homo sapiens FETAL BRAIN Homo sapiens cDNA... | 1845            | 0.0        | 99%          |
| BX459625.2 BX459625 Homo sapiens FETAL BRAIN Homo sapiens cDNA... | 1844            | 0.0        | 100%         |
| BX420340.1 BX420340 Homo sapiens FETAL BRAIN Homo sapiens cDNA... | 1840            | 0.0        | 100%         |
| BX440308.2 BX440308 Homo sapiens FETAL BRAIN Homo sapiens cDNA... | 1836            | 0.0        | 99%          |

# ALIGNMENTS

|            |      |                                                                                                                                                         |     |
|------------|------|---------------------------------------------------------------------------------------------------------------------------------------------------------|-----|
| Query      | 2    | TTTTTTCGCAACGGGTTTGCCGCCAGAACACAGGTGTCGTGAAAACTACCCCTAAAAGCCAAAATGGGAAAGGAAAGACTCATATCAACATTGTCGTATTGGACACGTAGATTTCGGGCAAGTCCACCCTACTGCCCATCTGATCTAT    | 151 |
| BY794942.2 | 25   | .....                                                                                                                                                   | 154 |
| DC527884.1 | 8    | .....                                                                                                                                                   | 157 |
|            |      |                                                                                                                                                         |     |
| Query      | 152  | AAATGCGGTGGCATCGACAAAAGAACCATTGAAAAATTTGAGAAGGAGGCTGCTGAGATGGGAAAGGGCTCCTTCAAGTATGCCTGGGTCTTGGATAAACTGAAAGCTGAGCGTGAACGTGGTATCACCATTGATATCTCCTTGTGGAAA  | 301 |
| BY794942.2 | 155  | .....                                                                                                                                                   | 304 |
| DC527884.1 | 158  | .....T.....                                                                                                                                             | 307 |
|            |      |                                                                                                                                                         |     |
| Query      | 302  | TTTGAGACCAGCAAGTACTATGTGACTATCATTGATGCCCCAGGACACAGAGACTTTATCAAAAACATGATTACAGGGACATCTCAGGCTGACTGTGCTGCTCCTGATTGTTGCTGCTGGTGTGGTGAATTTGAAGCTGGTATCTCCAAG  | 451 |
| BY794942.2 | 305  | .....                                                                                                                                                   | 454 |
| DC527884.1 | 308  | .....C.....                                                                                                                                             | 457 |
|            |      |                                                                                                                                                         |     |
| Query      | 452  | AATGGGCAGACCCGAGAGCATGCCCTTCTGGCTTACACACTGGGTGTGAAACAACATAATTGTCGGTGTTAACAAAATGATTCCACTGAGCCACCCTACAGCCAGAAGAGATATGAGGAAATTGTTAAGGATGGCAATGCCAGTGGAAACC | 601 |
| BY794942.2 | 721  | .....                                                                                                                                                   | 745 |
| BY794942.2 | 455  | .....                                                                                                                                                   | 585 |
| DC527884.1 | 724  | .....                                                                                                                                                   | 748 |
| DC527884.1 | 458  | .....                                                                                                                                                   | 588 |
| BX418589.2 | 1016 | .....                                                                                                                                                   | 992 |
| BX440470.1 | 1017 | .....                                                                                                                                                   | 993 |
| BX442182.2 | 1009 | .....                                                                                                                                                   | 985 |
| AL541984.3 | 1    | .....                                                                                                                                                   | 14  |
| BX418564.2 | 1015 | .....                                                                                                                                                   | 991 |
| BX459625.2 | 1004 | .....                                                                                                                                                   | 980 |
| BX420340.1 | 1010 | .....                                                                                                                                                   | 986 |
| BX440308.2 | 1014 | .....-K.....                                                                                                                                            | 992 |
|            |      |                                                                                                                                                         |     |
| Query      | 602  | ACGTCGCTTGAGGCTCTGGACTGCATCCTACCACCAACTCGTCCAATGACAAGCCCTTGGCCCTGCCTCTCCAGGATGTCTACAAAATTGGTGGTATTGGTACTGTTCTGTTGGCCGAGTGGAGACTGGTGTCTCAAACCCGGTATG     | 751 |



|            |      |                                                                                                                                                          |      |
|------------|------|----------------------------------------------------------------------------------------------------------------------------------------------------------|------|
| BY794942.2 | 746  | .....                                                                                                                                                    | 895  |
| DC527884.1 | 749  | .....                                                                                                                                                    | 898  |
| BX418589.2 | 991  | .....                                                                                                                                                    | 842  |
| BX440470.1 | 992  | .....R.....                                                                                                                                              | 843  |
| BX442182.2 | 984  | .....R.....                                                                                                                                              | 835  |
| AL541984.3 | 15   | .....C.....                                                                                                                                              | 164  |
| BX418564.2 | 990  | .....                                                                                                                                                    | 841  |
| BX459625.2 | 979  | .....A.....R.....                                                                                                                                        | 830  |
| BX420340.1 | 985  | .....                                                                                                                                                    | 836  |
| BX440308.2 | 991  | M.....R.....M.....                                                                                                                                       | 842  |
| Query      | 752  | GTGGTCACCTTTGCTCCAGTCAACGTTACAACGGAAGTAAATCTGTCGAAATGCACCATGAAGCTTTGAGTGAAGCTCTTCCTGGGGACAATGTGGGCTTCAATGTCAAGAAATGTGCTGTCAAGGATGTTCTGCTGTGGCAACGTTGCT   | 901  |
| BY794942.2 | 896  | .....                                                                                                                                                    | 1045 |
| DC527884.1 | 899  | .....                                                                                                                                                    | 1048 |
| BX418589.2 | 841  | .....                                                                                                                                                    | 692  |
| BX440470.1 | 842  | .....                                                                                                                                                    | 693  |
| BX442182.2 | 834  | .....                                                                                                                                                    | 685  |
| AL541984.3 | 165  | .....                                                                                                                                                    | 314  |
| BX418564.2 | 840  | .....C.....                                                                                                                                              | 691  |
| BX459625.2 | 829  | .....                                                                                                                                                    | 680  |
| BX420340.1 | 835  | .....                                                                                                                                                    | 686  |
| BX440308.2 | 841  | .....                                                                                                                                                    | 692  |
| Query      | 902  | GGTGACAGCAAAAAATGACCCACCAATGGAAGCAGCTGGCTTCACCTGCTCAGGTGATTATCCTGAACCATCCAGGCCAAATAAGCGCCGGCTATGCCCTGTATTGGATTGCCACACGGCTCACATTGCATGCAAGTTTGTCTGAGCTGAAG | 1051 |
| BY794942.2 | 1046 | .....                                                                                                                                                    | 1196 |
|            |      | \<br> <br>G                                                                                                                                              |      |
| DC527884.1 | 1049 | .....                                                                                                                                                    | 1198 |
| BX418589.2 | 691  | .....                                                                                                                                                    | 542  |
| BX440470.1 | 692  | .....                                                                                                                                                    | 543  |
| BX442182.2 | 684  | .....                                                                                                                                                    | 535  |
| AL541984.3 | 315  | .....                                                                                                                                                    | 464  |
| BX418564.2 | 690  | .....                                                                                                                                                    | 541  |
| BX459625.2 | 679  | .....                                                                                                                                                    | 530  |
| BX420340.1 | 685  | .....                                                                                                                                                    | 536  |
| BX440308.2 | 691  | .....M.....                                                                                                                                              | 542  |
| Query      | 1052 | GAAAAGATTGATCGCCGTTCTGGTAAAAAGCTGGAAGATGGCCCTAAATTTCTGAAAGTCTGGTGATGCTGCCATTGTTGATATGGTTCCTGGCAAGCCCATGTGTGTTGAGAGCTTCTCAGACTATCCACCTTTGGGTCGCTTTGCTGTT  | 1201 |
| BY794942.2 | 1197 | .....                                                                                                                                                    | 1346 |
| DC527884.1 | 1199 | .....                                                                                                                                                    | 1348 |
| BX418589.2 | 541  | .....Y.S.....                                                                                                                                            | 392  |
| BX440470.1 | 542  | .....                                                                                                                                                    | 392  |
|            |      | \<br> <br>C                                                                                                                                              |      |
| BX442182.2 | 534  | .....                                                                                                                                                    | 385  |
| AL541984.3 | 465  | .....                                                                                                                                                    | 614  |
| BX418564.2 | 540  | .....M.....                                                                                                                                              | 391  |
| BX459625.2 | 529  | .....                                                                                                                                                    | 380  |
| BX420340.1 | 535  | .....                                                                                                                                                    | 386  |
| BX440308.2 | 541  | .....                                                                                                                                                    | 392  |
| Query      | 1202 | CGTGATATGAGACAGACAGTTGCGGTGGGTGTCTCAAAGCAGTGGACAAGAAGGCTGCTGGAGCTGGCAAGGTCACCAAGTCTGCCAGAAAGCTCAGAAGGCTAANTGAATATTATCCCTAATACCTGCCACCCCACTCTTAATCAGT     | 1351 |
| BY794942.2 | 1347 | .....                                                                                                                                                    | 1496 |
| DC527884.1 | 1349 | .....A.....                                                                                                                                              | 1498 |
| BX418589.2 | 391  | .....C.....                                                                                                                                              | 242  |
| BX440470.1 | 391  | .....                                                                                                                                                    | 242  |
| BX442182.2 | 384  | .....                                                                                                                                                    | 235  |
| AL541984.3 | 615  | .....                                                                                                                                                    | 764  |
| BX418564.2 | 390  | .....                                                                                                                                                    | 241  |
| BX459625.2 | 379  | .....                                                                                                                                                    | 230  |
| BX420340.1 | 385  | .....                                                                                                                                                    | 236  |
| BX440308.2 | 391  | .....                                                                                                                                                    | 242  |
| Query      | 1352 | GGTGAAGAACGGTCTCAGAACTGTTGTTTCAATTGGCCATTTAAGTTTAGTAGTAAAGACTGGTTAATGATAACAATGCATCGTAAACCTTCAGAAGGAAAGGAGAAATgttttgggacactttggtttttcttttttgcgtgtgg       | 1501 |
| BY794942.2 | 1497 | .....                                                                                                                                                    | 1646 |
| DC527884.1 | 1499 | .....                                                                                                                                                    | 1648 |
| BX418589.2 | 241  | .....                                                                                                                                                    | 92   |
| BX440470.1 | 241  | .....                                                                                                                                                    | 92   |
| BX442182.2 | 234  | .....                                                                                                                                                    | 85   |
| AL541984.3 | 765  | .....K.....                                                                                                                                              | 914  |
| BX418564.2 | 240  | .....                                                                                                                                                    | 91   |
| BX459625.2 | 229  | .....                                                                                                                                                    | 80   |
| BX420340.1 | 235  | .....                                                                                                                                                    | 86   |
| BX440308.2 | 241  | .....                                                                                                                                                    | 92   |
| Query      | 1502 | cagttttaagttattagttttttaaatcagtagctttttaATGGAACAACCTTGACCAAAAAATTTGTACAGAAATTTGAGACCCCACTTAAAAAAGTTAAAT                                                  | 1602 |
| BY794942.2 | 1647 | .....                                                                                                                                                    | 1746 |
|            |      | \<br> <br>T                                                                                                                                              |      |

```

DC527884.1 1649 .....-..... 1748
                                     \
                                     |
                                     T
BX418589.2 91 .....-..... 1
                                     \
                                     |
                                     D
BX440470.1 91 .....-..... 1
                                     \
                                     |
                                     T
BX442182.2 84 .....-..... 1
                                     \
                                     |
                                     T
AL541984.3 915 S.....-..... 1015
                                     \
                                     |
                                     M
BX418564.2 90 .....-..... 1
BX459625.2 79 .....-..... 4
BX420340.1 85 .....-..... 2
                                     \
                                     |
                                     T
BX440308.2 91 .....-..... 1

```

Query= N21-3 [organism=Homo sapiens] eef1a1

Length=656

|                                             |                                                        | Score  | E     | Max   |
|---------------------------------------------|--------------------------------------------------------|--------|-------|-------|
| Sequences producing significant alignments: |                                                        | (Bits) | Value | ident |
| BX441194.2                                  | BX441194 Homo sapiens FETAL BRAIN Homo sapiens cDNA... | 1205   | 0.0   | 100%  |
| BX417098.2                                  | BX417098 Homo sapiens PLACENTA Homo sapiens cDNA cl... | 1205   | 0.0   | 100%  |
| CA422292.1                                  | UI-H-FG0-bdg-d-06-0-UI.s1 NCI_CGAP_EN1_2 Homo sapie... | 1203   | 0.0   | 100%  |
| BU628737.1                                  | UI-H-FG0-bdg-k-06-0-UI.s1 NCI_CGAP_EN1_2 Homo sapie... | 1203   | 0.0   | 100%  |
| BU628664.1                                  | UI-H-FG0-bdf-1-02-0-UI.s1 NCI_CGAP_EN1_2 Homo sapie... | 1203   | 0.0   | 100%  |
| CT005089.1                                  | CT005089 RZPD no.9017 Homo sapiens cDNA clone RZPDp... | 1201   | 0.0   | 100%  |
| CR999128.1                                  | CR999128 RZPD no.9017 Homo sapiens cDNA clone RZPDp... | 1201   | 0.0   | 100%  |
| CR996969.1                                  | CR996969 RZPD no.9017 Homo sapiens cDNA clone RZPDp... | 1201   | 0.0   | 100%  |
| CR996534.1                                  | CR996534 RZPD no.9017 Homo sapiens cDNA clone RZPDp... | 1201   | 0.0   | 100%  |
| CR989971.1                                  | CR989971 RZPD no.9017 Homo sapiens cDNA clone RZPDp... | 1201   | 0.0   | 100%  |

#### ALIGNMENTS

|            |     |                                                                                                                                                        |     |
|------------|-----|--------------------------------------------------------------------------------------------------------------------------------------------------------|-----|
| Query      | 1   | TGCTCAGGTGATTATCTGGAACCATCCAGGCCAAATAAGCGCCGGCTATGCCCTGTATTGGATTGCCACACGGCTCACATTGCATGCAAGTTTGTCTGAGCTGAAGGAAAAGATTGATCGCCGTTCTGGTAAAAAGCTGGAAGATGGCCC | 150 |
| BX441194.2 | 284 | .....                                                                                                                                                  | 433 |
| BX417098.2 | 235 | .....                                                                                                                                                  | 384 |
| CA422292.1 | 678 | .....                                                                                                                                                  | 529 |
| BU628737.1 | 678 | .....                                                                                                                                                  | 529 |
| BU628664.1 | 678 | .....                                                                                                                                                  | 529 |
| CT005089.1 | 18  | .....                                                                                                                                                  | 167 |
| CR999128.1 | 90  | .....                                                                                                                                                  | 239 |
| CR996969.1 | 123 | .....                                                                                                                                                  | 272 |
| CR996534.1 | 192 | .....                                                                                                                                                  | 341 |
| CR989971.1 | 48  | .....                                                                                                                                                  | 197 |
| Query      | 151 | TAAATTCCTTGAAGTCTGGTGATGCTGCCATTGTTGATATGGTTCTTGGCAAGCCCATGTGTTGTGAGAGCTTCTCAGACTATCCACCTTTGGGTCGCTTTGCTGTTCTGATATGAGACAGACAGTTGCGGTGGGTGTCAATCAAGCAGT | 300 |
| BX441194.2 | 434 | .....                                                                                                                                                  | 583 |
| BX417098.2 | 385 | .....                                                                                                                                                  | 534 |
| CA422292.1 | 528 | .....                                                                                                                                                  | 379 |
| BU628737.1 | 528 | .....                                                                                                                                                  | 379 |
| BU628664.1 | 528 | .....                                                                                                                                                  | 379 |
| CT005089.1 | 168 | .....                                                                                                                                                  | 317 |
| CR999128.1 | 240 | .....                                                                                                                                                  | 389 |
| CR996969.1 | 273 | .....                                                                                                                                                  | 422 |
| CR996534.1 | 342 | .....                                                                                                                                                  | 491 |
| CR989971.1 | 198 | .....                                                                                                                                                  | 347 |
| Query      | 301 | GGACAAGAAGGCTGCTGGAGCTGGCAAGGTACCAAGCTGCCAGAAAGCTCAGAAGGCTAAATGAATATTATCCCTAATACCTGCCACCCCACTCTTAATCAGTGGTGGAAGAACGGTCTCAGAAGCTGTTTGTCAATTGGCCATTT     | 450 |
| BX441194.2 | 584 | .....                                                                                                                                                  | 733 |
| BX417098.2 | 535 | .....                                                                                                                                                  | 684 |
| CA422292.1 | 378 | .....                                                                                                                                                  | 229 |
| BU628737.1 | 378 | .....                                                                                                                                                  | 229 |
| BU628664.1 | 378 | .....                                                                                                                                                  | 229 |
| CT005089.1 | 318 | .....                                                                                                                                                  | 467 |
| CR999128.1 | 390 | .....                                                                                                                                                  | 539 |
| CR996969.1 | 423 | .....                                                                                                                                                  | 572 |

|            |     |                                                                                                                                                     |     |
|------------|-----|-----------------------------------------------------------------------------------------------------------------------------------------------------|-----|
| CR996534.1 | 492 | .....                                                                                                                                               | 641 |
| CR989971.1 | 348 | .....                                                                                                                                               | 497 |
| Query      | 451 | AAGTTTAGTAGTAAAGACTGGTTAATGATAACAATGCATCGTAAACCTTCGACGGAAGGAGAGAAATgttttggaccactttggtttctcttttttgcgtgtggcagttttaagtattagtttttaaatacagtaacttttaATGGA | 600 |
| EX441194.2 | 734 | .....                                                                                                                                               | 883 |
| EX417098.2 | 685 | .....                                                                                                                                               | 834 |
| CA422292.1 | 228 | .....                                                                                                                                               | 79  |
| BU628737.1 | 228 | .....                                                                                                                                               | 79  |
| BU628664.1 | 228 | .....                                                                                                                                               | 79  |
| CT005089.1 | 468 | .....                                                                                                                                               | 617 |
| CR999128.1 | 540 | .....                                                                                                                                               | 689 |
| CR996969.1 | 573 | .....                                                                                                                                               | 722 |
| CR996534.1 | 642 | .....                                                                                                                                               | 791 |
| CR989971.1 | 498 | .....                                                                                                                                               | 647 |

| CR         | BU  | CT          | CR    | CR    | CR    | CR    | CR    |
|------------|-----|-------------|-------|-------|-------|-------|-------|
| 222222.1   | 78  | .....       | ..... | ..... | ..... | ..... | ..... |
|            |     |             |       |       |       |       |       |
| BU628737.1 | 78  | .....N..... | ..... | ..... | ..... | ..... | ..... |
|            |     |             |       |       |       |       |       |
| BU628664.1 | 78  | .....N..... | ..... | ..... | ..... | ..... | ..... |
|            |     |             |       |       |       |       |       |
| CT005089.1 | 618 | .....-..... | ..... | ..... | ..... | ..... | ..... |
|            |     |             |       |       |       |       |       |
| CR999128.1 | 690 | .....-..... | ..... | ..... | ..... | ..... | ..... |
|            |     |             |       |       |       |       |       |
| CR996969.1 | 723 | .....-..... | ..... | ..... | ..... | ..... | ..... |
|            |     |             |       |       |       |       |       |
| CR996534.1 | 792 | .....-..... | ..... | ..... | ..... | ..... | ..... |
|            |     |             |       |       |       |       |       |
| CR989971.1 | 648 | .....-..... | ..... | ..... | ..... | ..... | ..... |
|            |     |             |       |       |       |       |       |

| Sequences producing significant alignments: |          |                                               |      |     | Score<br>(Bits) | E | Max<br>ident |
|---------------------------------------------|----------|-----------------------------------------------|------|-----|-----------------|---|--------------|
| DC527884.1                                  | DC527884 | chimpanzee skin cDNA library PstA Pan trog... | 3053 | 0.0 | 99%             |   |              |
| BY794942.2                                  | BY794942 | Homo sapiens eye Homo sapiens cDNA clone H... | 3037 | 0.0 | 99%             |   |              |
| BX461649.2                                  | BX426149 | Homo sapiens NEUROBLASTOMA Homo sapiens c...  | 2012 | 0.0 | 97%             |   |              |
| BX418564.2                                  | BX418564 | Homo sapiens FETAL BRAIN Homo sapiens cDNA... | 1932 | 0.0 | 96%             |   |              |
| BX440470.1                                  | BX440470 | Homo sapiens FETAL BRAIN Homo sapiens cDNA... | 1929 | 0.0 | 100%            |   |              |
| BX418589.2                                  | BX418589 | Homo sapiens FETAL BRAIN Homo sapiens cDNA... | 1921 | 0.0 | 100%            |   |              |
| BX442182.2                                  | BX442182 | Homo sapiens FETAL BRAIN Homo sapiens cDNA... | 1910 | 0.0 | 100%            |   |              |
| BX420340.1                                  | BX420340 | Homo sapiens FETAL BRAIN Homo sapiens cDNA... | 1917 | 0.0 | 100%            |   |              |
| BX459625.2                                  | BX459625 | Homo sapiens FETAL BRAIN Homo sapiens cDNA... | 1910 | 0.0 | 100%            |   |              |
| BX325185.1                                  | BX325185 | Homo sapiens T CELLS (JURKAT CELL LINE) Co... | 1892 | 0.0 | 99%             |   |              |

|            |     |                                                                                                                                                         |     |
|------------|-----|---------------------------------------------------------------------------------------------------------------------------------------------------------|-----|
| Query      | 2   | TTTTTCGCAACGGGTTTGCCGCCAGAACACAGGTGTCGTGAAAATACCCCTAAAAGCCAAATGGGAAAGGAAAAGACTCATATCAACATTTGCTGTCATTGGACACGTAGATTTCGGGCAAGTCACCACACTACTGCCCATCTGATCTATA | 151 |
| DC527884.1 | 9   |                                                                                                                                                         | 158 |
| BY794942.2 | 25  |                                                                                                                                                         | 155 |
| Query      | 152 | AATGCGGTGGCATCGACAAAGAACCATTGAAAAATTTGAGAGGAGGCTGCTGAGATGSGAAAGGGCTCCTTCAAGTATGCCTGGGTCCTGGATAAATGAAAGCTGAGCGTGAACGTGGTATCACCATTGATATCTCCTTGTGGAAAT     | 301 |
| DC527884.1 | 159 |                                                                                                                                                         | 308 |
| BY794942.2 | 156 |                                                                                                                                                         | 305 |
| Query      | 302 | TTGAGACGACGAACTACTATGTGACTATCATTTGATGCCCCAGGACACAGAGACTTTATCAAAAACATGATTACAGGGACATCTCAGGCTGACTGTGCTGTCCTGATTGTGCTGCTGGTGTGGTGAATTTGAAGCTGGTATCTCCAAGA   | 451 |
| DC527884.1 | 309 |                                                                                                                                                         | 458 |

|            |      |                                                                                                                                                         |      |
|------------|------|---------------------------------------------------------------------------------------------------------------------------------------------------------|------|
| BY794942.2 | 306  | .....                                                                                                                                                   | 455  |
| Query      | 452  | ATGGGCAGACCCGAGAGCATGCCCTTCTGGCTTACACACTGGGTGTGAAACAATAATTGTCGGTGTAAACAAAATGGATTCCACTGAGCCACCTTACAGCCAGAGAGATATGAGGAAATTGTTAAGGAAGTCAGCACTTACATTAAAG    | 601  |
| DC527884.1 | 459  | .....                                                                                                                                                   | 608  |
| BY794942.2 | 456  | .....                                                                                                                                                   | 605  |
| BX426149.2 | 1196 | .....A.....A.....G.....                                                                                                                                 | 1121 |
| BX418564.2 | 1196 | .....YH.VS.....R.....W.....G.W.....R.....M.....K.....R.....                                                                                             | 1125 |
| Query      | 602  | AAATTGGCTACAACCCCGACACAGTAGCATTTGTGCCAATTTCTGGTTGGAATGGTGACAACATGCCCTTGGTTCAAGGGATGGAAGTCACCCGTAAGGATGGCAATGCCAGTGGAAACCACGCTGCTTGAGGCTCTGGACTGCATCCTAC | 751  |
| DC527884.1 | 609  | .....                                                                                                                                                   | 779  |
| BY794942.2 | 606  | .....AACATGCTGGAGCCAAGTGCT.....                                                                                                                         | 776  |
| BX426149.2 | 1120 | .....AACATGCTGGAGCCAAGTGCT.....                                                                                                                         | 950  |
| BX418564.2 | 1124 | .....S.....-R.....-.....TGGAGCCAAGTGCTAACATGC.....                                                                                                      | 960  |
| BX440470.1 | 1052 | .....C.....K.....                                                                                                                                       | 962  |
| BX418589.2 | 1051 | .....K.C.....                                                                                                                                           | 961  |
| BX442182.2 | 1041 | .....                                                                                                                                                   | 954  |
| BX420340.1 | 1045 | .....A.....                                                                                                                                             | 955  |
| BX459625.2 | 1039 | .....K.A.....                                                                                                                                           | 949  |
| BX325185.1 | 1050 | .....C.Y.....K.M.....W.....K.R.M.....K.....A.....                                                                                                       | 960  |
| Query      | 752  | CACCAACTCGTCCAACGTGACAAGCCCTTGCGCCTGCCTCTCCAGGATGTCACAAAAATGGTGGTATTGGTACTGTTCCTGTTGGCCGAGTGGAGACTGGTGTTCACAAACCCGGTATGGTGGTCACTTTGCTCCAGTCAACGTTACAA   | 901  |
| DC527884.1 | 780  | .....                                                                                                                                                   | 929  |
| BY794942.2 | 777  | .....                                                                                                                                                   | 926  |
| BX426149.2 | 949  | .....                                                                                                                                                   | 800  |
| BX418564.2 | 959  | .....C.....                                                                                                                                             | 810  |
| BX440470.1 | 961  | .....                                                                                                                                                   | 812  |
| BX418589.2 | 960  | .....R.....                                                                                                                                             | 811  |
| BX442182.2 | 953  | .....                                                                                                                                                   | 804  |
| BX420340.1 | 954  | .....R.....                                                                                                                                             | 805  |
| BX459625.2 | 948  | .....                                                                                                                                                   | 799  |
| BX325185.1 | 959  | .....R.....                                                                                                                                             | 810  |
| Query      | 902  | CGGAAGTAAATCTGTCGAAATGCACCATGAAGCTTTGAGTGAAGCTCTTCTGGGGACAATGTGGGCTTCAATGTCAAGAAATGTGTCTGTCAAGGATGTTGCTGCTGGCAACGTTGCTGGTGACAGCAAAAATGACCCCAATGGAAG     | 1051 |
| DC527884.1 | 930  | .....                                                                                                                                                   | 1079 |
| BY794942.2 | 927  | .....                                                                                                                                                   | 1076 |
| BX426149.2 | 799  | .....                                                                                                                                                   | 650  |
| BX418564.2 | 809  | .....C.....                                                                                                                                             | 660  |
| BX440470.1 | 811  | .....                                                                                                                                                   | 662  |
| BX418589.2 | 810  | .....                                                                                                                                                   | 661  |
| BX442182.2 | 803  | .....                                                                                                                                                   | 654  |
| BX420340.1 | 804  | .....                                                                                                                                                   | 655  |
| BX459625.2 | 798  | .....                                                                                                                                                   | 649  |
| BX325185.1 | 809  | .....                                                                                                                                                   | 660  |
| Query      | 1052 | CAGCTGGCTTCACTGCTCAGGTGATTATCTGAAACCATCCAGGCCAAAATAGCGCCGGCTATGCCCTGTATTGGATTGCCACACGGCTCACATTGCATGCAAGTTTGTGAGCTGAAGGAAAAGATTGATGCGCGTCTTGGTAAAAAGC    | 1201 |
| DC527884.1 | 1080 | .....                                                                                                                                                   | 1229 |
| BY794942.2 | 1077 | .....G.....                                                                                                                                             | 1227 |
| BX426149.2 | 649  | .....M.....                                                                                                                                             | 500  |
| BX418564.2 | 659  | .....                                                                                                                                                   | 510  |
| BX440470.1 | 661  | .....C.....Y.S.....                                                                                                                                     | 511  |
| BX418589.2 | 660  | .....                                                                                                                                                   | 511  |
| BX442182.2 | 653  | .....                                                                                                                                                   | 504  |
| BX420340.1 | 654  | .....                                                                                                                                                   | 505  |
| BX459625.2 | 648  | .....Y.....                                                                                                                                             | 499  |
| BX325185.1 | 659  | .....                                                                                                                                                   | 510  |
| Query      | 1202 | TGGAAGATGGCCCTAAATTCCTGAAGTCTGGTGATGCTGCCATTGTTGATATGGTTCTTGGCAAGCCCATGTGTGTTGAGAGCTTCTCAGACTATCCACCTTTGGGTCGCTTTGCTGTTCTGTGATATGAGACAGACAGTTGCGGTGGGTC | 1351 |
| DC527884.1 | 1230 | .....A.....                                                                                                                                             | 1379 |
| BY794942.2 | 1228 | .....                                                                                                                                                   | 1377 |
| BX426149.2 | 499  | .....                                                                                                                                                   | 350  |

|            |     |       |     |
|------------|-----|-------|-----|
| BX418564.2 | 509 | ..... | 360 |
| BX440470.1 | 510 | ..... | 361 |
| BX418589.2 | 510 | ..... | 361 |
| BX442182.2 | 503 | ..... | 354 |
| BX420340.1 | 504 | ..... | 355 |
| BX459625.2 | 498 | ..... | 349 |
| BX325185.1 | 509 | ..... | 360 |

|            |      |                                                                                                                                                         |      |
|------------|------|---------------------------------------------------------------------------------------------------------------------------------------------------------|------|
| Query      | 1352 | TCATCAAAAGCAGTGGACAAGAAGGCTGCTGGAGCTGGCAAGGTCACCAAGTCTGCCCAGAAAGCTCAGAAGGCTAAATGAATATTATCCCTAATACCTGCCACCCCACTCTTAATCAGTGGTGGANGAACGGTCTCAGAACGTGTTGTTT | 1501 |
| DC527884.1 | 1380 | .....C.....                                                                                                                                             | 1529 |
| BY794942.2 | 1378 | .....                                                                                                                                                   | 1527 |
| BX426149.2 | 349  | .....                                                                                                                                                   | 200  |
| BX418564.2 | 359  | .....                                                                                                                                                   | 210  |
| BX440470.1 | 360  | .....                                                                                                                                                   | 211  |
| BX418589.2 | 360  | .....                                                                                                                                                   | 211  |
| BX442182.2 | 353  | .....                                                                                                                                                   | 204  |
| BX420340.1 | 354  | .....                                                                                                                                                   | 205  |
| BX459625.2 | 348  | .....                                                                                                                                                   | 199  |
| BX325185.1 | 359  | .....                                                                                                                                                   | 210  |

|            |      |                                                                                                                                                     |      |
|------------|------|-----------------------------------------------------------------------------------------------------------------------------------------------------|------|
| Query      | 1502 | CAATTGGCCATTTAAGTTTAGTAGTAAAGACTGGTTAATGATAACAATGCATCTAAACCTTCAGAAGGAAAGGAGAATgttttgtggaccactttggttttcttttttgcgtgtggcagttttaagttattagtttttaaaatcagt | 1651 |
| DC527884.1 | 1530 | .....                                                                                                                                               | 1679 |
| BY794942.2 | 1528 | .....                                                                                                                                               | 1677 |
| BX426149.2 | 199  | .....                                                                                                                                               | 50   |
| BX418564.2 | 209  | .....                                                                                                                                               | 60   |
| BX440470.1 | 210  | .....                                                                                                                                               | 61   |
| BX418589.2 | 210  | .....                                                                                                                                               | 61   |
| BX442182.2 | 203  | .....                                                                                                                                               | 54   |
| BX420340.1 | 204  | .....                                                                                                                                               | 55   |
| BX459625.2 | 198  | .....                                                                                                                                               | 49   |
| BX325185.1 | 209  | .....                                                                                                                                               | 60   |

|            |      |                                                                      |      |
|------------|------|----------------------------------------------------------------------|------|
| Query      | 1652 | acttttttaATGGAAACACTTGACCACAAAATTGTGCACAGATTTTGTAGACCCATTAAAAAGTTAAA | 1719 |
| DC527884.1 | 1680 | .....                                                                | 1747 |
| BY794942.2 | 1678 | .....                                                                | 1745 |
| BX426149.2 | 49   | .....-.....-.....G.....G.....G.....T..                               | 1    |
| BX418564.2 | 59   | .....M.....                                                          | 1    |
| BX440470.1 | 60   | .....                                                                | 1    |
| BX418589.2 | 60   | .....D.....                                                          | 1    |
| BX442182.2 | 53   | .....                                                                | 1    |
| BX420340.1 | 54   | .....R.....                                                          | 1    |
| BX459625.2 | 48   | .....                                                                | 1    |
| BX325185.1 | 59   | .....                                                                | 1    |

Query= N23-12 [organism=Homo sapiens] eef1a1

Length=1128

| Sequences producing significant alignments:                       | Score<br>(Bits) | E<br>Value | Max<br>ident |
|-------------------------------------------------------------------|-----------------|------------|--------------|
| CD684311.1 EST831 human nasopharynx Homo sapiens cDNA, mRNA se... | 1136            | 0.0        | 98%          |
| CR768893.1 DKFPz468L0412_r1 468 (synonym: phrt1) Pongo abelii ... | 1072            | 0.0        | 100%         |
| DA037335.1 DA037335 BGGI11 Homo sapiens cDNA clone BGGI1100023... | 1072            | 0.0        | 100%         |
| DA085397.1 DA085397 BRACE2 Homo sapiens cDNA clone BRACE203976... | 1072            | 0.0        | 100%         |
| DB247234.1 DB247234 UTERU1 Homo sapiens cDNA clone UTERU100011... | 1072            | 0.0        | 100%         |
| DB246583.1 DB246583 UMVEN1 Homo sapiens cDNA clone UMVEN100002... | 1072            | 0.0        | 100%         |
| DB100941.1 DB100941 THYMU1 Homo sapiens cDNA clone THYMU100016... | 1072            | 0.0        | 100%         |
| DB100909.1 DB100909 THYMU1 Homo sapiens cDNA clone THYMU100013... | 1072            | 0.0        | 100%         |
| DB194465.1 DB194465 TRACH1 Homo sapiens cDNA clone TRACH100013... | 1072            | 0.0        | 100%         |
| DB194442.1 DB194442 TRACH1 Homo sapiens cDNA clone TRACH100011... | 1072            | 0.0        | 100%         |

ALIGNMENTS

|            |     |                                                                                                                                                         |     |
|------------|-----|---------------------------------------------------------------------------------------------------------------------------------------------------------|-----|
| Query      | 1   | CTTTTTTCGCAACGGGTTTGCCGCCAGAACACAGGTGTCGTGAAAACTACCCCTAAAAAGCCAAAAATGGGAAAGGAAAGAACTCATATCAACATTGTGTCATTGGACACGTAGATTTCGGGCAAGTCCACCACTACTGGCCATCTGATCT | 150 |
| CD684311.1 | 24  | .....-.....                                                                                                                                             | 169 |
| CR768893.1 | 2   | .....                                                                                                                                                   | 150 |
| DA037335.1 | 1   | .....                                                                                                                                                   | 149 |
| DA085397.1 | 1   | .....                                                                                                                                                   | 149 |
| DB247234.1 | 1   | .....                                                                                                                                                   | 149 |
| DB246583.1 | 1   | .....                                                                                                                                                   | 149 |
| DB100941.1 | 1   | .....                                                                                                                                                   | 149 |
| DB100909.1 | 1   | .....                                                                                                                                                   | 149 |
| DB194465.1 | 4   | .....                                                                                                                                                   | 152 |
| DB194442.1 | 1   | .....                                                                                                                                                   | 149 |
| Query      | 151 | ATAAATGCGGTGGCATCGACAAAAGAACATTGAAAAATTTGAGAAGGAGGCTGCTGAGATGGGAAAGGGCTCCTTCAAGTATGCCTGGGTCTTGGATAAACTGAAAGCTGAGCGTGAACGTGGTATCACCATTGATATCTCTCTGTGGA   | 300 |
| CD684311.1 | 170 | .....                                                                                                                                                   | 319 |
| CR768893.1 | 151 | .....                                                                                                                                                   | 300 |
| DA037335.1 | 150 | .....                                                                                                                                                   | 299 |
| DA085397.1 | 150 | .....                                                                                                                                                   | 299 |

|            |     |     |
|------------|-----|-----|
| DB247234.1 | 150 | 299 |
| DB246583.1 | 150 | 299 |
| DB100941.1 | 150 | 299 |
| DB100909.1 | 150 | 299 |
| DB194465.1 | 153 | 302 |
| DB194442.1 | 150 | 299 |

| Query      | 451 | AGAATGGGCGAGACCCGAGAGCATGCCCTTGGCTTACACATGGGTGTGAAACCACTAATTTGTGGTGTAAACAAAATGGATTCCACTGAGCCACCCCTACAGCCAGAAAGAGATATGAGGAAATTTGTAAGGAAAAGATTGATCGCGT | 607 |
|------------|-----|------------------------------------------------------------------------------------------------------------------------------------------------------|-----|
| CD684311.1 | 470 | .....                                                                                                                                                | 607 |
| CR768893.1 | 451 | .....                                                                                                                                                | 584 |
| DA037335.1 | 450 | .....                                                                                                                                                | 583 |
| DA085397.1 | 450 | .....                                                                                                                                                | 583 |
| DB247234.1 | 450 | .....                                                                                                                                                | 583 |
| DB246583.1 | 450 | .....                                                                                                                                                | 583 |
| DB100941.1 | 450 | .....                                                                                                                                                | 583 |
| DB100909.1 | 450 | .....                                                                                                                                                | 583 |
| DB194465.1 | 453 | .....                                                                                                                                                | 586 |
| DB194442.1 | 450 | .....                                                                                                                                                | 583 |

Query= N24-22 [organism=Homo sapiens] eef1a1

| Sequences producing significant alignments: |            |                    |                                  |      |     | Score<br>(Bits) | E | Max<br>ident |
|---------------------------------------------|------------|--------------------|----------------------------------|------|-----|-----------------|---|--------------|
| BX421307.2                                  | BX421307   | Homo sapiens       | B CELLS (RAMOS CELL LINE) Hom... | 1596 | 0.0 | 100%            |   |              |
| BX440302.2                                  | BX440302   | Homo sapiens       | B CELLS (RAMOS CELL LINE) Hom... | 1592 | 0.0 | 100%            |   |              |
| BY794942.2                                  | BY794942   | Homo sapiens       | eye Homo sapiens cDNA clone H... | 1592 | 0.0 | 100%            |   |              |
| BQ049312.1                                  | AGENCOCURT | 6795094 NIH_MGC_85 | Homo sapiens cDNA clon...        | 1592 | 0.0 | 100%            |   |              |
| BX417098.2                                  | BX417098   | Homo sapiens       | PLACENTA Homo sapiens cDNA c...  | 1591 | 0.0 | 100%            |   |              |
| BX441194.2                                  | BX441194   | Homo sapiens       | FETAL BRAIN Homo sapiens cDNA... | 1587 | 0.0 | 100%            |   |              |
| DC27884.1                                   | DC27884    | Japanese skin      | cDNA library TetA Pan trop...    | 1587 | 0.0 | 100%            |   |              |
| AL541918.3                                  | AL541918   | Homo sapiens       | PLACENTA Homo sapiens cDNA c...  | 1585 | 0.0 | 100%            |   |              |
| CR984260.1                                  | CR984260   | RZPD no.9017       | Homo sapiens cDNA clone RZPD...  | 1583 | 0.0 | 100%            |   |              |
| BX440436.2                                  | BX440436   | Homo sapiens       | FETAL BRAIN Homo sapiens cDNA... | 1583 | 0.0 | 100%            |   |              |

|            |      |                                                                                                                                                       |      |
|------------|------|-------------------------------------------------------------------------------------------------------------------------------------------------------|------|
| Query      | 1    | GAAGTCAGCACTTACATTAAGAAAATGGGTACAACCCCGACACAGTAGCATTTGTGCCAATTTCCTGGTTGGAATGGTGACAACATGCTGGAGCCAAGTGCTAACATGCCTTGGTTCAAGGGATGGAAGTCACCGTAAGGATGGCAATG | 150  |
| BY794942.2 | 584  | .....                                                                                                                                                 | 734  |
|            |      | \                                                                                                                                                     |      |
|            |      | I                                                                                                                                                     |      |
|            |      | C                                                                                                                                                     |      |
| DC527884.1 | 587  | .....                                                                                                                                                 | 737  |
|            |      | \                                                                                                                                                     |      |
|            |      | I                                                                                                                                                     |      |
|            |      | C                                                                                                                                                     |      |
| AL541984.3 | 1    |                                                                                                                                                       | 3    |
| BX440436.2 | 1087 | .....-K.....Y.....S.....-K.....-                                                                                                                      | 1004 |
|            |      | \                                                                                                                                                     |      |
|            |      | I                                                                                                                                                     |      |
|            |      | C                                                                                                                                                     |      |
| Query      | 151  | CCAGTGAACCA CGCTGCTTGAGGCTCTGGACTGCATCTACCAACCACTCGTCCA ACTGACAAGCCTTGCGCTGCTCTCCAGGATGTCTACAAAACTGGTGTTCTCAAACC CGGTATGGTGGTCACCTTTGCTCCAGTCAACGTATA | 300  |
| BX421307.2 | 30   | .....                                                                                                                                                 | 79   |
| BX443032.2 | 56   | .....                                                                                                                                                 | 105  |
| EY794942.2 | 874  | .....                                                                                                                                                 | 923  |
| BY794942.2 | 735  | .....                                                                                                                                                 | 839  |
|            |      | \                                                                                                                                                     |      |
|            |      | I                                                                                                                                                     |      |
|            |      | C                                                                                                                                                     |      |
| BQ049312.1 | 28   |                                                                                                                                                       | 77   |
| BX417098.2 | 19   |                                                                                                                                                       | 68   |
| BX441194.2 | 68   |                                                                                                                                                       | 117  |
| DC527884.1 | 877  |                                                                                                                                                       | 92   |

|            |      |                                                                                                                                                      |     |      |
|------------|------|------------------------------------------------------------------------------------------------------------------------------------------------------|-----|------|
| DC527884.1 | 738  | .....                                                                                                                                                |     | 842  |
|            |      |                                                                                                                                                      | \   |      |
|            |      |                                                                                                                                                      |     |      |
|            |      |                                                                                                                                                      | C   |      |
| AL541984.3 | 143  | .....                                                                                                                                                |     | 192  |
| AL541984.3 | 4    | .....                                                                                                                                                |     | 108  |
|            |      |                                                                                                                                                      | \   |      |
|            |      |                                                                                                                                                      |     |      |
|            |      |                                                                                                                                                      | C   |      |
| CR984260.1 | 46   | .....                                                                                                                                                |     | 95   |
| BX440436.2 | 866  | .....                                                                                                                                                |     | 817  |
| BX440436.2 | 1003 | .....-YK.....                                                                                                                                        |     | 901  |
|            |      |                                                                                                                                                      | \   |      |
|            |      |                                                                                                                                                      |     |      |
|            |      |                                                                                                                                                      | C   |      |
| Query      | 301  | CAACGGAAGTAAATCTGTCGAAATGCACCATGAAGCTTTGAGTGAAGCTCTTCCTGGGGACAATGTGGGCTTCAATGTCAAGAATGTGTCTGTCAAGGATGTTTCGTGTCGTCACGTTGCTGGTGACAGCAAAATGACCCACCAATGG | 450 |      |
| BX421307.2 | 80   | .....                                                                                                                                                |     | 229  |
| BX443032.2 | 106  | .....M.....                                                                                                                                          |     | 255  |
| BY794942.2 | 924  | .....                                                                                                                                                |     | 1073 |
| BQ049312.1 | 78   | .....                                                                                                                                                |     | 227  |
| BX417098.2 | 69   | .....                                                                                                                                                |     | 218  |
| BX441194.2 | 118  | .....                                                                                                                                                |     | 267  |
| DC527884.1 | 927  | .....                                                                                                                                                |     | 1076 |
| AL541984.3 | 193  | .....                                                                                                                                                |     | 342  |
| CR984260.1 | 96   | .....                                                                                                                                                |     | 245  |
| BX440436.2 | 816  | .....                                                                                                                                                |     | 667  |
| Query      | 451  | AAGCAGCTGGCTTCACCTCAGGTGATTATCCTGAACCATCCAGGCCAAATAAGCGCGGCTATGCCCTGTATTGGATTGCCACACGGCTCACATTGCATGCAGTTTGTCTGAGCTGAAGGAAAAGATTGATGCCGTTCTTGSTAAAAA  | 600 |      |
| BX421307.2 | 230  | .....                                                                                                                                                |     | 380  |
|            |      |                                                                                                                                                      | \   |      |
|            |      |                                                                                                                                                      |     |      |
|            |      |                                                                                                                                                      | C   |      |
| BX443032.2 | 256  | .....                                                                                                                                                |     | 406  |
|            |      |                                                                                                                                                      | \   |      |
|            |      |                                                                                                                                                      |     |      |
|            |      |                                                                                                                                                      | C   |      |
| BY794942.2 | 1074 | .....                                                                                                                                                |     | 1225 |
|            |      | \                                                                                                                                                    |     |      |
|            |      |                                                                                                                                                      |     |      |
|            |      | G                                                                                                                                                    |     |      |
| BQ049312.1 | 228  | .....                                                                                                                                                |     | 378  |
|            |      |                                                                                                                                                      | \   |      |
|            |      |                                                                                                                                                      |     |      |
|            |      |                                                                                                                                                      | C   |      |
| BX417098.2 | 219  | .....                                                                                                                                                |     | 369  |
|            |      |                                                                                                                                                      | \   |      |
|            |      |                                                                                                                                                      |     |      |
|            |      |                                                                                                                                                      | C   |      |
| BX441194.2 | 268  | .....                                                                                                                                                |     | 418  |
|            |      |                                                                                                                                                      | \   |      |
|            |      |                                                                                                                                                      |     |      |
|            |      |                                                                                                                                                      | C   |      |
| DC527884.1 | 1077 | .....                                                                                                                                                |     | 1227 |
|            |      |                                                                                                                                                      | \   |      |
|            |      |                                                                                                                                                      |     |      |
|            |      |                                                                                                                                                      | C   |      |
| AL541984.3 | 343  | .....                                                                                                                                                |     | 493  |
|            |      |                                                                                                                                                      | \   |      |
|            |      |                                                                                                                                                      |     |      |
|            |      |                                                                                                                                                      | C   |      |
| CR984260.1 | 246  | .....                                                                                                                                                |     | 396  |
|            |      |                                                                                                                                                      | \   |      |
|            |      |                                                                                                                                                      |     |      |
|            |      |                                                                                                                                                      | C   |      |
| BX440436.2 | 666  | .....                                                                                                                                                |     | 516  |
|            |      |                                                                                                                                                      | \   |      |
|            |      |                                                                                                                                                      |     |      |
|            |      |                                                                                                                                                      | C   |      |
| Query      | 601  | GCTGGAAGATGGCCCTAAATCTTGAAGTCTGGTGATGCTGCCATTGTGATATGGTTCTTGCCAAGCCCATGTGTGTTGAGAGCTTCTCAGACTATCCACCTTTGGGTGCTTTGCTGTTGATATGAGACAGACAGTTGCCGTGGG     | 750 |      |
| BX421307.2 | 381  | .....                                                                                                                                                |     | 530  |
| BX443032.2 | 407  | .....                                                                                                                                                |     | 556  |
| BY794942.2 | 1226 | .....                                                                                                                                                |     | 1375 |
| BQ049312.1 | 379  | .....                                                                                                                                                |     | 528  |
| BX417098.2 | 370  | .....                                                                                                                                                |     | 519  |
| BX441194.2 | 419  | .....                                                                                                                                                |     | 568  |
| DC527884.1 | 1228 | .....                                                                                                                                                |     | 1377 |
| AL541984.3 | 494  | .....                                                                                                                                                |     | 643  |
| CR984260.1 | 397  | .....                                                                                                                                                |     | 546  |
| BX440436.2 | 515  | .....                                                                                                                                                |     | 366  |

|            |      |                                                                                                                                                       |      |
|------------|------|-------------------------------------------------------------------------------------------------------------------------------------------------------|------|
| Query      | 751  | TGTCATCAAAGCAGTGGACAAGAAGGCTGCTGGAGCTGGCAAGGTACCAAGTCTGCCCAGAAAGCTCAGAAGGCTAAATGAATATTATCCCTAATACCTGCCACCCCACTCTTAATCAGTGGTGGGAAGACGGTCTCAGAACTGTTTGT | 900  |
| BX421307.2 | 531  | .....                                                                                                                                                 | 680  |
| BX443032.2 | 557  | .....                                                                                                                                                 | 706  |
| BY794942.2 | 1376 | .....                                                                                                                                                 | 1525 |
| BQ049312.1 | 529  | .....                                                                                                                                                 | 678  |
| BX417098.2 | 520  | .....                                                                                                                                                 | 669  |
| BX441194.2 | 569  | .....                                                                                                                                                 | 718  |
| DC527884.1 | 1378 | A.....C.....                                                                                                                                          | 1527 |
| AL541984.3 | 644  | .....                                                                                                                                                 | 793  |
| CR984260.1 | 547  | .....                                                                                                                                                 | 696  |
| BX440436.2 | 365  | .....                                                                                                                                                 | 216  |
| Query      | 901  | TTCAATTGGCCATTTAAGTTTAGTAGTAAAGACTGGTTAATGATAACAATGCATCGTAAACCTTCAGAAGGAAAGGAGATGttttgtggaccactttgttttctttttgcgtgtggcagttttaagttattagtttttaaaatca     | 1050 |
| BX421307.2 | 681  | .....                                                                                                                                                 | 830  |
| BX443032.2 | 707  | .....                                                                                                                                                 | 856  |
| BY794942.2 | 1526 | .....                                                                                                                                                 | 1675 |
| BQ049312.1 | 679  | .....                                                                                                                                                 | 828  |
| BX417098.2 | 670  | .....                                                                                                                                                 | 819  |
| BX441194.2 | 719  | .....                                                                                                                                                 | 868  |
| DC527884.1 | 1528 | .....                                                                                                                                                 | 1677 |
| AL541984.3 | 794  | .....K.S.....                                                                                                                                         | 943  |
| CR984260.1 | 697  | .....N.....                                                                                                                                           | 846  |
| BX440436.2 | 215  | .....                                                                                                                                                 | 66   |

|            |      |                                                                        |      |
|------------|------|------------------------------------------------------------------------|------|
| Query      | 1051 | gtacttttttaATGGAAACAACCTTGACCAAAAAATTTGTACAGAAATTTTGGAGCCCAATTAATAAAGT | 1117 |
| BX421307.2 | 831  | .....                                                                  | 897  |
| BX443032.2 | 857  | .....                                                                  | 923  |
| BY794942.2 | 1676 | .....                                                                  | 1742 |
| BQ049312.1 | 829  | .....                                                                  | 896  |
|            |      | \                                                                      |      |
|            |      | A                                                                      |      |
| BX417098.2 | 820  | .....-                                                                 | 885  |
| BX441194.2 | 869  | .....-                                                                 | 934  |
| DC527884.1 | 1678 | .....                                                                  | 1744 |
| AL541984.3 | 944  | .....                                                                  | 1011 |
|            |      | \                                                                      |      |
|            |      | M                                                                      |      |
| CR984260.1 | 847  | .....N.....                                                            | 912  |
| BX440436.2 | 65   | .....N.....                                                            | 1    |
|            |      | \                                                                      |      |
|            |      | N                                                                      |      |

Query= N25-C\* [organism=Homo sapiens] eef1a1

Length=1832

| Sequences producing significant alignments: |                  |                                                   | Score<br>(Bits) | E<br>Value | Max<br>ident |
|---------------------------------------------|------------------|---------------------------------------------------|-----------------|------------|--------------|
| BY794942.2                                  | BY794942         | Homo sapiens eye cDNA clone H...                  | 3147            | 0.0        | 100%         |
| DC527884.1                                  | DC527884         | chimpanzee skin cDNA library PstA Pan troglodytes | 3131            | 0.0        | 100%         |
| CF111220.1                                  | Shultzomica04471 | Rat lung airway and parenchyma cDNA               | 2346            | 0.0        | 92%          |
| BX426149.2                                  | BX426149         | Homo sapiens NEUROBLASTOMA Homo sapiens cDNA      | 2146            | 0.0        | 99%          |
| CO001006.1                                  | OC028            | pre-oestrus adult sheep ovary library Ovis aries  | 2047            | 0.0        | 93%          |
| BX418564.2                                  | BX418564         | Homo sapiens FETAL BRAIN Homo sapiens cDNA        | 2047            | 0.0        | 97%          |
| BX426150.2                                  | BX426150         | Homo sapiens NEUROBLASTOMA Homo sapiens cDNA      | 2034            | 0.0        | 99%          |
| AL567209.3                                  | AL567209         | Homo sapiens FETAL BRAIN Homo sapiens cDNA        | 2001            | 0.0        | 98%          |
| BX440470.1                                  | BX440470         | Homo sapiens FETAL BRAIN Homo sapiens cDNA        | 1999            | 0.0        | 98%          |
| BX420340.1                                  | BX420340         | Homo sapiens FETAL BRAIN Homo sapiens cDNA        | 1997            | 0.0        | 99%          |

#### ALIGNMENTS

|            |      |                                                                                                                                                         |      |
|------------|------|---------------------------------------------------------------------------------------------------------------------------------------------------------|------|
| Query      | 124  | CGCAGGTGTCGTGAAAACTACCCCTAAAAGCCAAAATGGGAAAGGAAAGACTCATATCAACATTGTCTGTCATTGGACACGTAGATTTCGGGCAAGTCCACCACTACTGGCCATCTGATCTATAAATGCGGTGGCATCGACAAAAGAACCA | 273  |
| BY794942.2 | 35   | .....                                                                                                                                                   | 182  |
| DC527884.1 | 38   | .....                                                                                                                                                   | 185  |
| CF111220.1 | 25   | .....T.....G.C...G.....A.....C.....C.....A.....C.....A.....C.....C.....T.....A.....                                                                     | 178  |
|            |      | \                                                                                                                                                       |      |
|            |      | ATTC                                                                                                                                                    |      |
| BX426150.2 | 6    | .....                                                                                                                                                   | 153  |
| Query      | 274  | TTGAAAAAATTTGAGAAGGAGGCTGCTGAGATGGGAAAGGGCTCCTTCAAGTATGCCTGGGCTTTGGATAAACTGAAAGCTGAGCGTGAACGTGGTATCACCATTGATATCTCCTTGTGGAAATTTGAGACCAGCAAGTACTATGTGACTA | 423  |
| BY794942.2 | 183  | .....                                                                                                                                                   | 332  |
| DC527884.1 | 186  | .....T.....                                                                                                                                             | 335  |
| CF111220.1 | 179  | .....G.....G.....A.....C.....C.....G.....T.....C.....C.....G.....                                                                                       | 328  |
| CO001006.1 | 1464 | .....                                                                                                                                                   | 1440 |
| BX426150.2 | 154  | .....                                                                                                                                                   | 303  |



|            |      |                                                                                                                                                             |      |
|------------|------|-------------------------------------------------------------------------------------------------------------------------------------------------------------|------|
| Query      | 424  | TCATTGATGCCCCAGGCACACAGAGACTTTAATCAAAAACATGATTACAGGGACATCTCAGCGTGACTGTGCTGTCCCTGATTGTTGCTGCTGGTGTGGTGAATTTGAAGCTGGTATCTCCAAGAATGGGCAGACCCGAGAGCATGCCCTTC    | 573  |
| BY794942.2 | 333  | .....                                                                                                                                                       | 482  |
| DC527884.1 | 336  | .....C.....                                                                                                                                                 | 485  |
| CF111220.1 | 329  | ...C...G....G..C.....C.....T.....T.....                                                                                                                     | 478  |
| CO001006.1 | 1439 | .....C.....C.....C.....C.....T.....                                                                                                                         | 1290 |
| BX426150.2 | 304  | .....C.....C.....C.....C.....T.....                                                                                                                         | 453  |
| Query      | 574  | TGGCTTACACACTGGGTGTGAAACAACATAATTGTCGGTGTAAACAAAATGGATTCCACTGAGCCACCCTACAGCCAGAAGATATGAGGAAATTGTTAAGGAAGTCAGCACTTACATTAAAGAAAATTGGCTACAACCCCGACACAGTAG      | 723  |
| BY794942.2 | 483  | .....                                                                                                                                                       | 632  |
| DC527884.1 | 486  | .....                                                                                                                                                       | 635  |
| CF111220.1 | 479  | .....TT.....G.....T.....C.....C.....A.....T.....C.....C.....C.....T.....                                                                                    | 628  |
| BX426149.2 | 1196 | .....-A.....-A.....-A.....G.....                                                                                                                            | 1094 |
| CO001006.1 | 1289 | .....C.....T.....C.....T.....C.....C.....C.....C.....                                                                                                       | 1140 |
| BX418564.2 | 1196 | .....YH.VS...R...W...G.W...R...M.K...R...S...-R...                                                                                                          | 1100 |
| BX426150.2 | 454  | .....S.....W...K.W...R...A.M.C.....C.....                                                                                                                   | 603  |
| AL567209.3 | 1145 | .....S.....W...K.W...R...A.M.C.....C.....                                                                                                                   | 1064 |
|            |      | M                                                                                                                                                           |      |
| BX440470.1 | 1128 | .....-W.....                                                                                                                                                | 1101 |
|            |      | C                                                                                                                                                           |      |
| BX420340.1 | 1117 | ...M..M.....                                                                                                                                                | 1097 |
| Query      | 724  | CATTTGTGCCAATTTCTGGTGGGAATGGTGACAACTGCTGGAGCCAAAGTGCTAACATGCCCTGGTTCAAGGGATGGAAGTCACCCGTAAGGATGGCAATGCCAGTGGAAACCACGCTGCTTGAGGCTCTGGACTGCATCTACCAACCAA      | 873  |
| BY794942.2 | 633  | .....                                                                                                                                                       | 782  |
| DC527884.1 | 636  | .....                                                                                                                                                       | 785  |
| CF111220.1 | 629  | .....T.G.....C.A...G.....C.....G.A.T.....T.G.G.....                                                                                                         | 778  |
| BX426149.2 | 1093 | .....C.....T.A.....C.....C.....C.....A.....T.....G.....                                                                                                     | 944  |
| CO001006.1 | 1139 | .....C.....T.A.....C.....C.....C.....A.....T.....G.....                                                                                                     | 929  |
| BX418564.2 | 1099 | .....C.....T.A.....C.....C.....C.....A.....T.....G.....                                                                                                     | 954  |
| BX426150.2 | 604  | .....C.....T.A.....C.....C.....C.....A.....T.....G.....                                                                                                     | 753  |
| AL567209.3 | 1063 | .....C.....T.A.....C.....C.....C.....A.....T.....G.....                                                                                                     | 914  |
| BX440470.1 | 1100 | ...-S.M...Y.-K.....K.....K.....R.....                                                                                                                       | 956  |
| BX420340.1 | 1096 | ...K.-..S.M.W...YT..D..K.-..T.....Y.....A.....                                                                                                              | 949  |
| Query      | 874  | CTCGTCCAACGTACAAGCCCTTGGCGCTGCCTCTCCAGGATGTCTACAAAAATGGTGGTATTGGTACTGTTCTCTGTTGGCCGAGTGAGAGCTGGTGTCTCAAAACCCGGTATGGTGTGCACCTTTGCTCCAGTCAACGTTACACGGGAAG     | 1023 |
| BY794942.2 | 783  | .....                                                                                                                                                       | 932  |
| DC527884.1 | 786  | .....                                                                                                                                                       | 935  |
| CF111220.1 | 779  | .....TC..A...C.....T.....C..C.....C.....G.....A.....T.....T.....T.....A..A..T.....                                                                          | 928  |
| BX426149.2 | 943  | .....A.....C.....T.....C.....C.....C.....G.....A.....T.....T.....T.....A..A..T.....                                                                         | 794  |
| CO001006.1 | 989  | .....C.....A...C...TT.....T.....A.....G..T..T.....T.....C.....T.....T.....A..A..T.....G.....                                                                | 840  |
| BX418564.2 | 953  | .....C.....A...C...TT.....T.....A.....G..T..T.....T.....C.....T.....T.....A..A..T.....G.....                                                                | 804  |
| BX426150.2 | 754  | .....C.....A...C...TT.....T.....A.....G..T..T.....T.....C.....T.....T.....A..A..T.....G.....                                                                | 903  |
| AL567209.3 | 913  | .....C.....A...C...TT.....T.....A.....G..T..T.....T.....C.....T.....T.....A..A..T.....G.....                                                                | 764  |
| BX440470.1 | 955  | .....C.....A...C...TT.....T.....A.....G..T..T.....T.....C.....T.....T.....A..A..T.....G.....                                                                | 806  |
| BX420340.1 | 948  | .....R.....                                                                                                                                                 | 799  |
| Query      | 1024 | TAAAACTCTGTCGAAATGCACCATGAAGCTTTTGAGTGAAGCTCTTCTCTGGGGACAATGTGGGCTTCAATGTCAAGAATGTGTCTGTCAAGGATGTTCTGCTGGTGGCAACGTTGCTGGTGACAGCAAAAATGACCCACCAATGGAAGCAGCTG | 1173 |
| BY794942.2 | 933  | .....                                                                                                                                                       | 1082 |
| DC527884.1 | 936  | .....                                                                                                                                                       | 1085 |
| CF111220.1 | 929  | .C..G...G.....G.....A.....C.A...C.....A..C..A.A.....T.....G.....                                                                                            | 1078 |
| BX426149.2 | 793  | .G..G..C..A.....C.....C.....A.....C.....T.....G.....                                                                                                        | 644  |
| CO001006.1 | 839  | .G..G..C..A.....C.....C.....A.....C.....T.....G.....                                                                                                        | 690  |
| BX418564.2 | 803  | .G..G..C..A.....C.....C.....A.....C.....T.....G.....                                                                                                        | 654  |
| BX426150.2 | 904  | .G..G..C..A.....C.....C.....A.....C.....T.....G.....                                                                                                        | 1050 |
|            |      | G                                                                                                                                                           |      |
| AL567209.3 | 763  | .....                                                                                                                                                       | 615  |
| BX440470.1 | 805  | .....                                                                                                                                                       | 656  |
| BX420340.1 | 798  | .....                                                                                                                                                       | 649  |
| Query      | 1174 | GCTTCACCTGCTCAGGTGATTATCCTGAACCATCCAGGCCAAATAAGCGCCGGCTATGCCCTGTATTGGATTGCCACACGGCTCACATTGCATGCAAGTTTGCTGAGCTGAAGGAAAAGATTGATCGCCGTCTTGGTAAAAAGCTGGAAG      | 1323 |
| BY794942.2 | 1083 | .....                                                                                                                                                       | 1233 |
|            |      | G                                                                                                                                                           |      |
| DC527884.1 | 1086 | .....                                                                                                                                                       | 1235 |
| CF111220.1 | 1079 | .....G..C..T..T.....TC..C.....C.....A.....C.....T..A..G...C...T.....G.....                                                                                  | 1228 |
| BX426149.2 | 643  | .....C..A.....T.....C..T.GT..A...A...GC.....T..A.....T.....G.....                                                                                           | 494  |
| CO001006.1 | 689  | .....C..A.....T.....C..T.GT..A...A...GC.....T..A.....T.....G.....                                                                                           | 540  |
| BX418564.2 | 653  | .....C..A.....T.....C..T.GT..A...A...GC.....T..A.....T.....G.....                                                                                           | 504  |
| BX426150.2 | 1051 | .....C..A.....T.....C..T.GT..A...A...GC.....T..A.....T.....G.....                                                                                           | 1140 |
| AL567209.3 | 614  | .....C..A.....T.....C..T.GT..A...A...GC.....T..A.....T.....G.....                                                                                           | 465  |
| BX440470.1 | 655  | .....C..A.....T.....C..T.GT..A...A...GC.....T..A.....T.....G.....                                                                                           | 505  |
|            |      | C                                                                                                                                                           |      |
| BX420340.1 | 648  | .....                                                                                                                                                       | 499  |

Query 1324 ATGGCCCTAAATCTTTGAAGTCTGGTGATGCTGCCATTGTTGATATGGTTCTGGCAAGCCCATGTGTGTTGAGAGCTTCTCAGACTATCCACCTTTGGGTGCTTTGCTGTTGATATGAGACAGACAGTTGCGGTGGGTGTCATCA 1473  
BY794942.2 1234 ..... 1383  
DC527884.1 1236 .....A..... 1385  
CF111220.1 1229 .....C.....C.....A.....T.....C..T..AC.T.....T.....C.....G.....T..... 1378  
BX426149.2 493 ..... 344  
CO001006.1 539 .....A.....C.....C.....T.....C.....T..T..T..T..C.....C..T.....G.....C.....C..T..... 390  
BX418564.2 503 ..... 354  
AL567209.3 464 .....K..... 315  
BX440470.1 504 ..... 355  
BX420340.1 498 ..... 349

Query 1474 AAGCAGTGGACAAGAAGCTGCTGGAGCTGGCAAGGTCACCAAGTCTGCCAGAAAGCTCAGAAGGCTAAATGAATATTATCCCTAATACCTGCCACCCCACTCTTAATCAGTGGTGAAGAAGCGGTCTCAGAACTGTTGTTCAATTG 1623  
BY794942.2 1384 ..... 1533  
DC527884.1 1386 .....C..... 1535  
CF111220.1 1379 .....C.....A.....A.....C.....G.....C..... 1528  
BX426149.2 343 ..... 194  
CO001006.1 389 .....A.....C.....G.....C..... 240  
BX418564.2 353 ..... 204  
AL567209.3 314 .....M.....Y..... 164

BX440470.1 354 .....A..... 205  
BX420340.1 348 ..... 199

Query 1624 GCCATTTAAGTTTAGTAGTAAAGACTGGTAAATGATAACAAATGCATCGTAAACCTTCAGAAGGAAAGGAGAAATgtttttgtggaccacttttggttttttttttgcgtgtggcagttttaagttattagtttttaaaatcagttactttt 1773  
BY794942.2 1534 ..... 1683  
DC527884.1 1536 .....G.....C..... 1685  
CF111220.1 1529 .....A..... 1667  
BX426149.2 193 .....-.....G.....-..... 44  
CO001006.1 239 .....A.....-.....A.....G.....-.....-..... 99

BX418564.2 203 .....T..... 54  
AL567209.3 163 ..... 13

BX440470.1 204 .....G..... 55  
BX420340.1 198 ..... 49

Query 1774 taATGGAACAACCTTGACCAAAAAATTTGTCACAGAAATTTTGAGACCCATTAAAAAAGTT 1832  
BY794942.2 1684 ..... 1742  
DC527884.1 1686 ..... 1744  
CF111220.1 1668 .....C..... 1726

BX426149.2 43 .....G.....G.....G.....T..... 1  
CO001006.1 98 .....A.....C.....-..... 40

BX418564.2 53 .....M..... 1  
AL567209.3 12 ..... 1  
BX440470.1 54 ..... 1  
BX420340.1 48 .....R..... 1

Query= N26-20 [organism=Homo sapiens] eef1a1

Length=1067

| Sequences producing significant alignments:                       |                 |            |              |
|-------------------------------------------------------------------|-----------------|------------|--------------|
|                                                                   | Score<br>(Bits) | E<br>Value | Max<br>ident |
| BX421307.2 BX421307 Homo sapiens B CELLS (RAMOS CELL LINE) Hom... | 1592            | 0.0        | 100%         |
| BX443032.2 BX443032 Homo sapiens B CELLS (RAMOS CELL LINE) Hom... | 1589            | 0.0        | 100%         |
| BY794942.2 BY794942 Homo sapiens eye Homo sapiens cDNA clone H... | 1589            | 0.0        | 100%         |
| BQ049312.1 AGENCOURT 6795094 NIH_MGC 85 Homo sapiens cDNA clon... | 1589            | 0.0        | 100%         |
| BX417098.2 BX417098 Homo sapiens PLACENTA Homo sapiens cDNA cl... | 1587            | 0.0        | 100%         |
| BX441194.2 BX441194 Homo sapiens FETAL BRAIN Homo sapiens cDNA... | 1583            | 0.0        | 100%         |
| BX440436.2 BX440436 Homo sapiens FETAL BRAIN Homo sapiens cDNA... | 1583            | 0.0        | 100%         |
| BX440470.1 BX440470 Homo sapiens FETAL BRAIN Homo sapiens cDNA... | 1583            | 0.0        | 100%         |
| DC527884.1 DC527884 chimpanzee skin cDNA library PstA Pan trog... | 1581            | 0.0        | 100%         |
| AL541984.3 AL541984 Homo sapiens PLACENTA Homo sapiens cDNA cl... | 1581            | 0.0        | 100%         |

ALIGNMENTS

Query 1 GAAAGAAAAAGACTCATATCAACATTGTCGTCAATTGGACACGTAGATTCGGGCAAGTCCACCACTACTGGCCATCTGATCTATAAATGCGGTGGCATTGACAAAAGAACATTGAAAAATTTGAGAAGGAGGCTGCTGAGATGGGAAAGG 150  
BY794942.2 72 ..... 221

[illegible]

```

      c
BX440436.2 318 ..... 168
      |
      c
BX440470.1 315 ..... 165
      |
      c
DC527884.1 1425 .....C..... 1575
      |
      c
AL541984.3 691 ..... 841
      |
      c

```

```

Query      901  AATGCATCGTAAACCTTCAGAAGGAAAGGAGAAATgttttggaccactttggttttctttttgcgtgtggcagttttaagttattagtttttaaaatcagttacttttaATGGAAACAACTTGACCAAAAATTTGCACAGATTTT 1050
BX421307.2 729 ..... 878
BX443032.2 755 ..... 904
BY794942.2 1574 ..... 1723
BQ049312.1 727 ..... 876
BX417098.2 718 ..... 867
BX441194.2 767 ..... 916
BX440436.2 167 .....N..... 17

```

```

      |
      N
BX440470.1 164 ..... 15
      |
      N
DC527884.1 1576 ..... 1725
AL541984.3 842 .....K.S..... 992
      |
      M

```

```

Query      1051  GAGACCCATTAAAAAAG 1067
BX421307.2 879 ..... 895
BX443032.2 905 ..... 921
BY794942.2 1724 ..... 1740
BQ049312.1 877 ..... 894
      |
      A
BX417098.2 868 ..... 883
BX441194.2 917 ..... 932
BX440436.2 16 ..... 1
BX440470.1 14 ..... 1
DC527884.1 1726 ..... 1742
AL541984.3 993 ..... 1009

```

Query= N27-C\* [organism=Homo sapiens] eef1a1  
Length=1807

| Sequences producing significant alignments: |                                                        | Score<br>(Bits) | E<br>Value | Max<br>ident |
|---------------------------------------------|--------------------------------------------------------|-----------------|------------|--------------|
| BY794942.2                                  | BY794942 Homo sapiens eye Homo sapiens cDNA clone H... | 3134            | 0.0        | 100%         |
| DC527884.1                                  | DC527884 chimpanzee skin cDNA library PstA Pan trog... | 3116            | 0.0        | 100%         |
| CF111220.1                                  | Shultzomica04471 Rat lung airway and parenchyma cDN... | 2331            | 0.0        | 92%          |
| BX426149.2                                  | BX426149 Homo sapiens NEUROBLASTOMA Homo sapiens cD... | 2143            | 0.0        | 99%          |
| CO001006.1                                  | OC028 pre-oestrus adult sheep ovary library Ovis ar... | 2041            | 0.0        | 93%          |
| BX418564.2                                  | BX418564 Homo sapiens FETAL BRAIN Homo sapiens cDNA... | 2041            | 0.0        | 97%          |
| BX426150.2                                  | BX426150 Homo sapiens NEUROBLASTOMA Homo sapiens cD... | 2028            | 0.0        | 99%          |
| AL567209.3                                  | AL567209 Homo sapiens FETAL BRAIN Homo sapiens cDNA... | 2001            | 0.0        | 98%          |
| BX440470.1                                  | BX440470 Homo sapiens FETAL BRAIN Homo sapiens cDNA... | 1993            | 0.0        | 98%          |
| BX420340.1                                  | BX420340 Homo sapiens FETAL BRAIN Homo sapiens cDNA... | 1991            | 0.0        | 98%          |

#### ALIGNMENTS

```

Query      105  GTGTCGTGAAAACCTACCCCTAAAAGCCAAAATGGGAAAGGAAAGACTCATATCAACATTGTCTGTCATTGGACACGTAGATTGGGGCAAGTCCACCACTACTGGCCATCTGATCTATAAATGCGGTGGCATCGACAAAAGAACCATTTGAA 254
BY794942.2 38 ..... 187
DC527884.1 41 ..... 190
CF111220.1 55 .....A.....C.....C.....A.....C.....A..C.....C.....C.....T.....A..... 183
BX426150.2 9 ..... 158

Query      255  AAATTTGAGAAGGAGGCTGCTGAGATGGGAAAGGGCTCCTTCAAGTATGCCTGGGCTTGGATAAACTGAAAGCTGAGCGTGAACGGTGATCACCATTGATATCTCTTGTGGAAATTTGAGACCAGCAAGTACTATGTGACTATCATT 404
BY794942.2 188 ..... 337
DC527884.1 191 ..... 340
CF111220.1 184 ..G.....G.....A.....C.....C.....G.....T.....T.....C.....C.....G..... 333

```

[illegible]

BX420340.1 643 ..... C ..... 494

Query 1305 CCTAAATTCTTGAAGTCTGGTGATGCTGCCATTGTTGATATGGTTCCTGGCAAGCCCATGTGTGTTGAGAGCTTCTCAGACTATCCACCTTTGGGTCGCTTTGCTGTTCTGTATGAGACAGACAGTTGCGGTGGGTGTCATCAAAGCA 1454

BY794942.2 1239 ..... 1388

DC527884.1 1241 ..... A ..... 1390

CF111220.1 1234 ..C.....C.....C.....A.....T.....C..T..AC.T.....T.....C.....G.....T.....C 1383

BX426149.2 488 ..... 339

CO001006.1 534 ..... A.....C.....C.....T.....C.....T..T..T.....T..C.....C..T.....G.....C.....C..T..... 385

BX418564.2 498 ..... 349

AL567209.3 459 ..... K ..... 310

BX440470.1 499 ..... 350

BX420340.1 493 ..... 344

Query 1455 GTGGACAAGAAGGCTGCTGGAGCTGGCAAGGTCAACAACTCTGCCAGAAAGCTCAGAAGGCTAAATGAATATTATCCCTAATACCTGCCACCCCACTCTTAATCAGTGGTGAAGAACGGTCTCAGAACTGTTTGTTCATTTGGCCAT 1604

BY794942.2 1389 ..... 1538

DC527884.1 1391 ..... C ..... 1540

CF111220.1 1384 ..... A.....A.....C.....G.....C..... 1533

BX426149.2 338 ..... 189

CO001006.1 384 ..... A.....C.....G.....C..... 235

BX418564.2 348 ..... 199

AL567209.3 309 ..... M.....Y..... 159

..... \ .....  
..... | .....  
..... A .....  
BX440470.1 349 ..... 200

BX420340.1 343 ..... 194

Query 1605 TTAAGTTTAGTAGTAAAGACTGGTTAATGATAACAAATGCATCGTAAACCTTCAGAAGGAAGGAGAAATgttttggaccactttgggttttcttttttgcgtgtggcagttttaagtatttagtttttaaaatcagtaactttttaATG 1754

BY794942.2 1539 ..... 1688

DC527884.1 1541 ..... 1690

CF111220.1 1534 ..... A.....-..-..-..G..-..-..C..... 1672

BX426149.2 188 ..... 39

CO001006.1 234 ..... A.....-..A.....G..-..-..-..-..-..-.. 94

..... \ .....  
..... | .....  
..... T .....  
BX418564.2 198 ..... 49

AL567209.3 158 ..... 9

..... \ .....  
..... | .....  
..... G .....  
BX440470.1 199 ..... 50

BX420340.1 193 ..... 44

Query 1755 GAAACAACCTTGACAAAAATTTGTACACAGAATTTTGTGAGACCCATTAAAAAAG 1807

BY794942.2 1689 ..... 1740

DC527884.1 1691 ..... 1742

CF111220.1 1673 ..... C.....-..-..-.. 1724

..... \ .....  
..... | .....  
..... C .....  
BX426149.2 38 -..-..-..G.....G.....-..T.. 1

CO001006.1 93 A.....C.....-..-..-.. 44

BX418564.2 48 ..... M..... 1

AL567209.3 8 -..-..-.. 1

BX440470.1 49 ..... 1

BX420340.1 43 ..... R..... 1

Query= N28-13 [organism=Homo sapiens] eef1a1

Length=1189

| Sequences producing significant alignments: |                                                         | Score<br>(Bits) | E<br>Value | Max<br>ident |
|---------------------------------------------|---------------------------------------------------------|-----------------|------------|--------------|
| DC527884.1                                  | DC527884 chimpanzee skin cDNA library PstA Pan trog...  | 2182            | 0.0        | 100%         |
| BY794942.2                                  | BY794942 Homo sapiens eye Homo sapiens cDNA clone H...  | 2152            | 0.0        | 100%         |
| BX426150.2                                  | BX426150 Homo sapiens NEUROBLASTOMA Homo sapiens cD...  | 2037            | 0.0        | 99%          |
| BU902062.1                                  | AGENCOCURT_10127553 NIH MGC 71 Homo sapiens cDNA clo... | 1999            | 0.0        | 98%          |
| BX402801.2                                  | BX402801 Homo sapiens T CELLS (JURKAT CELL LINE) CO...  | 1988            | 0.0        | 98%          |
| AL513590.3                                  | AL513590 Homo sapiens PLACENTA Homo sapiens cDNA cl...  | 1977            | 0.0        | 97%          |
| BX402793.2                                  | BX402793 Homo sapiens T CELLS (JURKAT CELL LINE) CO...  | 1973            | 0.0        | 98%          |
| BX440468.2                                  | BX440468 Homo sapiens FETAL BRAIN Homo sapiens cDNA...  | 1971            | 0.0        | 98%          |
| AL513664.3                                  | AL513664 Homo sapiens NEUROBLASTOMA Homo sapiens cD...  | 1962            | 0.0        | 98%          |
| DC852462.1                                  | DC852462 macaque spleen cDNA library QspA Macaca fa...  | 1960            | 0.0        | 97%          |

ALIGNMENTS

Query 2 CTTTTTCGCAACGGGTTTGCCGCCAGAAACACAGGTGTCGTGAAAACTACCCCTAAAGCCAAAATGGGAAGGAAAGAACTCATATCAACATTGTCGTCAATTGGACACGTAGATTGGGGCAAGTCCAACCACTACTGGCCATCTGATCTAT 151

DC527884.1 9 ..... 157

|            |     |                                                                                                                                                            |      |
|------------|-----|------------------------------------------------------------------------------------------------------------------------------------------------------------|------|
| BY794942.2 | 25  | .....                                                                                                                                                      | 151  |
| BX426150.2 | 1   | .....T.....                                                                                                                                                | 125  |
| BU902062.1 | 1   | .....                                                                                                                                                      | 136  |
| BX402801.2 | 1   | .....A.....                                                                                                                                                | 139  |
| AL513590.3 | 2   | .....                                                                                                                                                      | 122  |
|            |     | .....\.....<br>.....C.....                                                                                                                                 |      |
| BX402793.2 | 6   | .....                                                                                                                                                      | 138  |
| BX440468.2 | 1   | .....                                                                                                                                                      | 129  |
| AL513664.3 | 1   | .....                                                                                                                                                      | 129  |
| DC852462.1 | 1   | .....C.....                                                                                                                                                | 150  |
| Query      | 152 | AAATGGCGGTGCGCATCGACAAAGAACCATTTGAAAAATTTGAGAAGGAGGCTGCTGAGATGGGAAAGGCTCCTTCAGTATGCTGGGTCTTTGGATAAACTGAAGCTGAGCGTGAACGTGGTATCACCATTGATATCTCTTGTGGAA        | 301  |
| DC527884.1 | 158 | .....T.....                                                                                                                                                | 307  |
| BY794942.2 | 155 | .....                                                                                                                                                      | 304  |
| BX426150.2 | 126 | .....                                                                                                                                                      | 275  |
| BU902062.1 | 137 | .....                                                                                                                                                      | 286  |
| BX402801.2 | 140 | .....                                                                                                                                                      | 289  |
| AL513590.3 | 123 | .....B.....                                                                                                                                                | 272  |
| BX402793.2 | 139 | .....                                                                                                                                                      | 288  |
| BX440468.2 | 130 | .....                                                                                                                                                      | 279  |
| AL513664.3 | 130 | .....G.....Y.....                                                                                                                                          | 279  |
| DC852462.1 | 151 | .....G.....                                                                                                                                                | 300  |
| Query      | 302 | TTTGGAGCCAGCAAGTACTATGTGACTATCATTTGATGCCCCAGGACACAGAGACTTTATCAAAAACATGATTACAGGGACATCTCAGGCTGACTGTGCTGCTCCTGATTGTTGCTGCTGGTGTGGTGAATTTGAAGCTGGTATCTCAG      | 451  |
| DC527884.1 | 308 | .....C.....                                                                                                                                                | 457  |
| BY794942.2 | 305 | .....                                                                                                                                                      | 454  |
| BX426150.2 | 276 | .....                                                                                                                                                      | 425  |
| BU902062.1 | 287 | .....                                                                                                                                                      | 436  |
| BX402801.2 | 290 | .....                                                                                                                                                      | 439  |
| AL513590.3 | 273 | .....K..B..B.....K..                                                                                                                                       | 422  |
| BX402793.2 | 289 | .....                                                                                                                                                      | 438  |
| BX440468.2 | 280 | .....Y.....                                                                                                                                                | 429  |
| AL513664.3 | 280 | .....                                                                                                                                                      | 429  |
| DC852462.1 | 301 | .....T.....C.....                                                                                                                                          | 450  |
| Query      | 452 | AAATGGGCGAGCCCGAGAGCATGCCCTTCTGGCTTACACACTGGGTGTGAACAACCTAATTTGTCGGTGTTAACAAAATGGATTCCACTGAGCCACCCCTACAGCCAGAAGAGATATGAGGAAATTTGTTAAGGAAGTCAGCACTTACATTAAG | 601  |
| DC527884.1 | 458 | .....                                                                                                                                                      | 607  |
| BY794942.2 | 455 | .....                                                                                                                                                      | 604  |
| BX426150.2 | 426 | .....                                                                                                                                                      | 575  |
| BU902062.1 | 437 | .....                                                                                                                                                      | 586  |
| BX402801.2 | 440 | .....                                                                                                                                                      | 589  |
| AL513590.3 | 423 | .....                                                                                                                                                      | 572  |
| BX402793.2 | 439 | .....                                                                                                                                                      | 588  |
| BX440468.2 | 430 | .....                                                                                                                                                      | 579  |
| AL513664.3 | 430 | .....T.....T.....C.....                                                                                                                                    | 579  |
| DC852462.1 | 451 | .....T.....C.....                                                                                                                                          | 600  |
| Query      | 602 | AAAAATGGCTACAAACCCGACACAGTAGCATTTGTGCCAATTTCTGGTTGGAAATGGTGACAAATGCTGGAGCCAAATGCTAACATGCCTTGGTTCAAGGGATGGAAGTCACCCGTAAAGGATGGCAATGCCAGTGGAAACCAAGCTGCTT    | 751  |
| DC527884.1 | 608 | .....                                                                                                                                                      | 754  |
| BY794942.2 | 605 | .....                                                                                                                                                      | 751  |
| BX426150.2 | 576 | .....                                                                                                                                                      | 725  |
| BU902062.1 | 587 | .....                                                                                                                                                      | 736  |
| BX402801.2 | 590 | .....                                                                                                                                                      | 739  |
| AL513590.3 | 573 | .....Y.....Y.....-.....T.....                                                                                                                              | 722  |
| BX402793.2 | 589 | .....                                                                                                                                                      | 738  |
| BX440468.2 | 580 | .....-.....                                                                                                                                                | 728  |
| AL513664.3 | 580 | .....K.....                                                                                                                                                | 729  |
| DC852462.1 | 601 | .....G.....                                                                                                                                                | 750  |
| Query      | 752 | GAGGCTCTGGACTGCATCTTACCACCAACTCGTCCAACCTGACAAGCCCTTGCGCCCTGCCTCCAGGATGCTACAAAAATTTGGTGGTATTTGGTACTGTTCTCTGTTGGCCGAGTGGAGACTGGTGTCTCAAACCCGGTATGGTGGTCACC   | 901  |
| DC527884.1 | 758 | .....                                                                                                                                                      | 907  |
| BY794942.2 | 755 | .....                                                                                                                                                      | 904  |
| BX426150.2 | 726 | .....                                                                                                                                                      | 875  |
| BU902062.1 | 737 | .....C..G.....                                                                                                                                             | 886  |
| BX402801.2 | 740 | .....                                                                                                                                                      | 889  |
| AL513590.3 | 722 | .....Y.....                                                                                                                                                | 871  |
| BX402793.2 | 739 | .....                                                                                                                                                      | 888  |
| BX440468.2 | 729 | .....                                                                                                                                                      | 878  |
| AL513664.3 | 730 | .....                                                                                                                                                      | 879  |
| DC852462.1 | 751 | .....                                                                                                                                                      | 900  |
| Query      | 902 | TTTGCTCCAGTCACAGTTACAACGGAATAAATCTGTCGAAATGCACCATGAAGCTTTGAGTGAAGCTCTTCTCTGGGGCAATGTGGGCTTCAATGTCAAGAATGTGCTGTCAAGGATGTTCTGCTGGCAACGTGCTGGTGACAGC          | 1051 |
| DC527884.1 | 908 | .....                                                                                                                                                      | 1057 |
| BY794942.2 | 905 | .....                                                                                                                                                      | 1054 |
| BX426150.2 | 876 | .....\.....<br>.....G.....                                                                                                                                 | 1024 |
| BU902062.1 | 887 | .....-.....AC.....C...C.....C...C.....\.....                                                                                                               | 1036 |

```

BX402801.2 890 .....W.....Y.....Y.....T.....K.T.A.....M.K.....S. 1041
                                     \
                                     | G
                                     |
AL513590.3 872 .....T.....T.....Y.....R.....M.....T.....C. 1020
BX402793.2 889 .....S.....TM.A.....R.....S. 1037
EX440468.2 879 .....W.....R.....M.....S- 1026
AL513664.3 880 .....T.....W.....K.....A.....K.T.....G.....GC.....S. 1030
                                     \
                                     | G
                                     |
DC852462.1 901 .....T.....-.....-.....-.....-.....-.....-.....-..... 1045
Query      1052 AAAAATGACCCACCAATGGAAGCAGCTGGCTTCACTGCTCAGGTGATTATCCTGAACCATCCAGGCCAAATAAGCGCCGGCTATGCCCTGTATTGGATTGCCACACGGCTCACATTGCATGCAAGTTTGCTGAGCTG 1189
DC527884.1 1058 ..... 1195
BY794942.2 1055 ..... 1193
                                     \
                                     | G
                                     |
BX426150.2 1025 .....-.....-.....-.....-.....-.....T..... 1140
BU902062.1 1037 .....C.G.....-.....T.....G.....A.....C.G..T..... 1163
                                     \
                                     | C
                                     |
BX402801.2 1042 ...W..A.....K..Y.....T.W.....W.....S.S-.....K.W..... 1144
                                     \
                                     | G
                                     |
AL513590.3 1021 .....Y.....K.C.....W.....M.M.-.....T.....T...M.Y...S.Y.A..... 1153
                                     \
                                     | C
                                     |
BX402793.2 1038 ...WKR...M.....M...Y.....M.M...M...M.....S... 1121
BX440468.2 1027 .....M.....M.....M.....MWC..R.....A..M...S...Y- 1120
AL513664.3 1031 .....G.....Y.....W.M.....WR...S.SY-.....T..... 1127
DC852462.1 1046 .....C-.....-.....-.....-.....T-..T-.....G-..A..G.....A.....-C-..... 1168
                                     \
                                     | G
                                     |

```

Database: Database of GenBank+EMBL+DDBJ sequences from EST Divisions

Posted date: Feb 24, 2019 1:46 AM  
Number of letters in database: 43,200,890,307  
Number of sequences in database: 77,566,966

```

Lambda      K      H
  1.33    0.621    1.12
Gapped
Lambda      K      H
  1.28    0.460    0.850
Matrix: blastn matrix:1 -2
Gap Penalties: Existence: 0, Extension: 0
Number of Sequences: 77566966
Number of Hits to DB: 3956718
Number of extensions: 27026
Number of successful extensions: 27026
Number of sequences better than 10: 972
Number of HSP's better than 10 without gapping: 0
Number of HSP's gapped: 23040
Number of HSP's successfully gapped: 22826
Length of database: 43200890307
A: 0
X1: 13 (25.0 bits)
X2: 32 (59.1 bits)
X3: 54 (99.7 bits)
S1: 13 (25.1 bits)

```



BLASTN 2.9.0+  
Reference: Zheng Zhang, Scott Schwartz, Lukas Wagner, and  
Webb Miller (2000), "A greedy algorithm for aligning DNA  
sequences", J Comput Biol 2000; 7(1-2):203-14.

RID: 8R733CVH014

Database: Database of GenBank+EMBL+DDBJ sequences from EST Divisions  
77,566,966 sequences; 43,200,890,307 total letters  
Query= Tl-C [organism=Homo sapiens] anxl  
Length=1480

| Sequences producing significant alignments: |                                                        | Score<br>(Bits)                                                                                                                                          | E<br>Value | Max<br>ident |
|---------------------------------------------|--------------------------------------------------------|----------------------------------------------------------------------------------------------------------------------------------------------------------|------------|--------------|
| BU508007.1                                  | AGENCOURT_10128424 NIH_MGC_71 Homo sapiens cDNA clo... | 1929                                                                                                                                                     | 0.0        | 98%          |
| AL570428.3                                  | AL570428 Homo sapiens PLACENTA COT 25-NORMALIZED Ho... | 1910                                                                                                                                                     | 0.0        | 98%          |
| AL544231.3                                  | AL544231 Homo sapiens PLACENTA COT 25-NORMALIZED Ho... | 1905                                                                                                                                                     | 0.0        | 98%          |
| DC631365.1                                  | DC631365 macaque bone marrow cDNA library Qbma Maca... | 1879                                                                                                                                                     | 0.0        | 94%          |
| DC636772.1                                  | DC636772 macaque bone marrow cDNA library Qbma Maca... | 1853                                                                                                                                                     | 0.0        | 94%          |
| AL541874.3                                  | AL541874 Homo sapiens PLACENTA Homo sapiens cDNA cl... | 1853                                                                                                                                                     | 0.0        | 99%          |
| BU902298.1                                  | AGENCOURT_10127317 NIH_MGC_71 Homo sapiens cDNA clo... | 1847                                                                                                                                                     | 0.0        | 96%          |
| BX438944.2                                  | BX438944 Homo sapiens PLACENTA Homo sapiens cDNA cl... | 1844                                                                                                                                                     | 0.0        | 99%          |
| AL576223.3                                  | AL576223 Homo sapiens PLACENTA COT 25-NORMALIZED Ho... | 1831                                                                                                                                                     | 0.0        | 98%          |
| AL570884.3                                  | AL570884 Homo sapiens PLACENTA COT 25-NORMALIZED Ho... | 1825                                                                                                                                                     | 0.0        | 97%          |
| ALIGNMENTS                                  |                                                        |                                                                                                                                                          |            |              |
| Query                                       | 87                                                     | AGTGTGAAATCTTCAGAGAAGAATTTCTCTTTAGTTCTTTGCAAGAGGTAGAGATAAAGACACTTTTTCAAAAAATGGCAATGGTATCAGAATTCCTCAAGCAGGCCTGGTTTATTGAAAAATGAAGAGCAGGAATATGTTCAAACCTGTGA | 236        |              |
| BU508007.1                                  | 1                                                      | .....\                                                                                                                                                   | 131        |              |
|                                             |                                                        |                                                                                                                                                          |            |              |
|                                             |                                                        | N                                                                                                                                                        |            |              |
| AL544231.3                                  | 19                                                     | ..T.....                                                                                                                                                 | 151        |              |
| DC631365.1                                  | 1                                                      | .....C.C.....                                                                                                                                            | 149        |              |
| DC636772.1                                  | 1                                                      | .....C.C.....                                                                                                                                            | 149        |              |
| AL541874.3                                  | 1                                                      | .....                                                                                                                                                    | 125        |              |
| BU902298.1                                  | 24                                                     | .....\                                                                                                                                                   | 164        |              |
|                                             |                                                        |                                                                                                                                                          |            |              |
|                                             |                                                        | N                                                                                                                                                        |            |              |
| BX438944.2                                  | 1                                                      | .....                                                                                                                                                    | 133        |              |
| Query                                       | 237                                                    | AGTCATCCAAAGGTGGTCCCGATCAGCGGTGAGCCCTATCCTACCTTCAATCCATCCTCGGATGTGCTGCTTGCATAAGGCCATAATGGTTAAAGGTGTGGATGAAGCAACCATCATTGACATTCTAACTAAGCGAAACAATGCAC       | 386        |              |
| BU508007.1                                  | 132                                                    | .....                                                                                                                                                    | 281        |              |
| AL570428.3                                  | 1088                                                   | .....-T.....-..                                                                                                                                          | 1068       |              |
| AL544231.3                                  | 152                                                    | .....T.....A.....T.....C.....                                                                                                                            | 301        |              |
| DC631365.1                                  | 150                                                    | .A.....T.....A.....T.....C.....                                                                                                                          | 299        |              |
| DC636772.1                                  | 150                                                    | .A.....T.....A.....C.....                                                                                                                                | 299        |              |
| AL541874.3                                  | 126                                                    | .....C.....                                                                                                                                              | 275        |              |
| BU902298.1                                  | 165                                                    | .....                                                                                                                                                    | 314        |              |
| BX438944.2                                  | 134                                                    | .....                                                                                                                                                    | 283        |              |
| Query                                       | 387                                                    | AGCGTCAACAGATCAAAAGCAGCATATCTCCAGGAAACAGGAAAGCCCTGGATGAAACACTGAAGAAAGCCCTTACAGGTACCTTGAGGAGGTTGTTTGTAGCTCTGCTAAAAACTCCAGCGCAATTTGATGCTGATGAACCTCGTGCTG   | 536        |              |
| BU508007.1                                  | 282                                                    | ..T.....A.....W.....GC.....-Y.....                                                                                                                       | 431        |              |
| AL570428.3                                  | 1067                                                   | .....                                                                                                                                                    | 922        |              |
| AL544231.3                                  | 302                                                    | .....TG.....G.....                                                                                                                                       | 451        |              |
| DC631365.1                                  | 300                                                    | .....TG.....G.....                                                                                                                                       | 449        |              |
| DC636772.1                                  | 300                                                    | .....G.TG.....G.....                                                                                                                                     | 449        |              |
| AL541874.3                                  | 276                                                    | .....                                                                                                                                                    | 425        |              |
| BU902298.1                                  | 315                                                    | .....                                                                                                                                                    | 464        |              |
| BX438944.2                                  | 284                                                    | .....                                                                                                                                                    | 433        |              |
| AL576223.3                                  | 1050                                                   | .....-W.....-R.....-Y.....-R.....-D.....-WR.....-A.....-V.....                                                                                           | 917        |              |
| AL570884.3                                  | 1059                                                   | .....T.....T.....C.....Y.....W.....RS.....W.....Y.M.....R.....T.....K.....YY..S.W.....C.....K...S                                                        | 924        |              |
|                                             |                                                        |                                                                                                                                                          |            |              |
|                                             |                                                        | M                                                                                                                                                        |            |              |
| Query                                       | 537                                                    | CCATGAAGGGCCTTGAAGACTGATGAAGATACTCTAATTGAGATTTTGGCATCAAGAACTAACAAAGAAATCAGAGACATTACAGGGTCTACAGAGAGGAAGAGAGATCTGCCAAAGACATAACCTCAGACACATCTGGAGATT         | 686        |              |
| BU508007.1                                  | 432                                                    | .....M.....                                                                                                                                              | 581        |              |
| AL570428.3                                  | 921                                                    | .....W.....                                                                                                                                              | 772        |              |
| AL544231.3                                  | 452                                                    | .....                                                                                                                                                    | 601        |              |
| DC631365.1                                  | 450                                                    | .....C.....G.....G.....                                                                                                                                  | 599        |              |
| DC636772.1                                  | 450                                                    | .....C.....G.....                                                                                                                                        | 599        |              |
| AL541874.3                                  | 426                                                    | .....                                                                                                                                                    | 575        |              |
| BU902298.1                                  | 465                                                    | .....                                                                                                                                                    | 614        |              |
| BX438944.2                                  | 434                                                    | .....                                                                                                                                                    | 583        |              |
| AL576223.3                                  | 916                                                    | .....W.AAR.....                                                                                                                                          | 767        |              |

|            |      |                                                                                                                                                        |      |
|------------|------|--------------------------------------------------------------------------------------------------------------------------------------------------------|------|
| AL570884.3 | 923  | .....                                                                                                                                                  | 774  |
| Query      | 687  | TTCGGAACGCTTTGCTTTCTCTTGCTAAGGGTGACCGATCTGAGGACTTTGGTGTGAATGAAGACTTGGCTGATTGAGTCCAGGGCCCTGTATGAAGCAGGAGAAAGGAGAAAGGGGACAGACGTAACGTTCTCAATACCATCCTTA    | 836  |
| BU508007.1 | 582  | .....                                                                                                                                                  | 731  |
| AL570428.3 | 771  | .....R.....N.....                                                                                                                                      | 622  |
| AL544231.3 | 602  | .....                                                                                                                                                  | 751  |
| DC631365.1 | 600  | .....G.....T.....                                                                                                                                      | 749  |
| DC636772.1 | 600  | .....G.....T.....                                                                                                                                      | 749  |
| AL541874.3 | 576  | .....G.....T.....                                                                                                                                      | 725  |
| BU902298.1 | 615  | .....                                                                                                                                                  | 764  |
| BX438944.2 | 584  | .....                                                                                                                                                  | 733  |
| AL576223.3 | 766  | .....                                                                                                                                                  | 617  |
| AL570884.3 | 773  | .....                                                                                                                                                  | 624  |
| Query      | 837  | CCACCAGAAGCTATCCACAACCTTCGCAGAGTGTTCAGAAATACACCAAGTACAGTAAGCATGACATGAACAAGTTCTGGACCTGGAGTTGAAAGGTGACATTGAGAAATGCCTCACAGCTATCGTGAAGTGGCCACAAGCAAAACAG   | 986  |
| BU508007.1 | 732  | .....                                                                                                                                                  | 881  |
| AL570428.3 | 621  | .....A.....                                                                                                                                            | 472  |
| AL544231.3 | 752  | .....C.....T.....                                                                                                                                      | 900  |
| DC631365.1 | 750  | .....C.....T.....                                                                                                                                      | 899  |
| DC636772.1 | 750  | .....C.....T.....                                                                                                                                      | 899  |
| AL541874.3 | 726  | .....                                                                                                                                                  | 875  |
| BU902298.1 | 765  | .....A.....TG.....                                                                                                                                     | 914  |
| BX438944.2 | 734  | .....                                                                                                                                                  | 883  |
| AL576223.3 | 616  | .....                                                                                                                                                  | 467  |
| AL570884.3 | 623  | .....                                                                                                                                                  | 474  |
| Query      | 987  | CTTTCTTTGCAGAGAAGCTTCATCAAGCCATGAAAGGTGTGTGAACTCGCATTAAGGCATTGATCAGGATTATGGTTTCCCGTCTCGAAATGACATGAATGATATCAAGCATTCTATCAGAAGATGTATGGTATCTCCCTTTGCCAAG   | 1136 |
| BU508007.1 | 882  | .....C.....G.....G.....C.....                                                                                                                          | 1032 |
| AL570428.3 | 471  | .....G.....A.....T.....C.....                                                                                                                          | 322  |
| AL544231.3 | 901  | .....G.W.....WY.....                                                                                                                                   | 1048 |
| DC631365.1 | 900  | .....A.....G.....C.....A.....                                                                                                                          | 1048 |
| DC636772.1 | 900  | .....A.....G.....C.....A.....                                                                                                                          | 1048 |
| AL541874.3 | 876  | .....T.....G.....T.....W.K.....                                                                                                                        | 1019 |
| BU902298.1 | 915  | .....C.....GA.....G.....T.....A.....C.....T.....A.....A.G.....A.....C.....G.....C.....                                                                 | 1067 |
| BX438944.2 | 884  | .....K.....R.....S.....D.....R.....Y.....W.KD.....Y.....                                                                                               | 1030 |
| AL576223.3 | 466  | .....A.....                                                                                                                                            | 317  |
| AL570884.3 | 473  | .....                                                                                                                                                  | 324  |
| Query      | 1137 | CCATCCTGGATGAAACCAAGGAGATTATGAGAAAATCCTGGTGGCTCTTTGTGGAGGAACTAAACATTCCCTTTGATGGTCTCAAGCTATGATCAGAAGACTTTAATTATATATTTTCATCCTATAAGCTTAAATAGGAAAGTTTCTTC  | 1286 |
| BU508007.1 | 1033 | ..T...G.....C.....GA...T..TA.....C.....C.....                                                                                                          | 1123 |
| AL570428.3 | 321  | .....G.....A.....T.....AG.....                                                                                                                         | 172  |
| AL544231.3 | 1049 | ..MWY.....R.....Y..K.....K.....R.....                                                                                                                  | 1102 |
| DC631365.1 | 1049 | .....A.....CA...G.....C.....C.....                                                                                                                     | 1173 |
| DC636772.1 | 1049 | .....GG.....GA.....C.....G.....C.....                                                                                                                  | 1174 |
| AL541874.3 | 1020 | ..M.....C.....G.....A.....A.....C.....G.....A.....AA.....                                                                                              | 1029 |
| BU902298.1 | 1068 | .....T.....G.....A.....A.....C.....G.....A.....AA.....                                                                                                 | 1152 |
| AL576223.3 | 316  | .....G.....G.....G.....G.....T.....A.....T.....                                                                                                        | 167  |
| AL570884.3 | 323  | .....C.....                                                                                                                                            | 174  |
| Query      | 1287 | AACAGGATTACAGTGTAGCTACCTACATGCTGAAAAATATAGCCTTTAAATCATTTTTATATTATAACTCTGTATAATAGAGATAAGTCCATTTTTTAAAAATGTTTTCCCAAAACCATAAAACCCATACAAAGTTGTTCTAGTAACAAT | 1436 |
| AL570428.3 | 171  | .....T.....                                                                                                                                            | 22   |
| DC631365.1 | 1174 | .....C.....T.....C.....A.....                                                                                                                          | 1216 |

DC636772.1 1175 .....G...-A...-T-.....T...GG...A...A..... 1231

AL576223.3 166 .....B..... 17

AL570884.3 173 .....RW...V.....N...N...W 23

Query 1437 ACATGAGAAAGATGTCTATGT 1457

AL570428.3 21 ..... 1

AL576223.3 16 ..... 1

AL570884.3 22 .....A..... 1

Query= T2-2 [organism=Homo sapiens] anxa1

Length=1065

| Sequences producing significant alignments: |                                                        |      | Score<br>(Bits) | E<br>Value | Max<br>ident |
|---------------------------------------------|--------------------------------------------------------|------|-----------------|------------|--------------|
| BQ228162.1                                  | AGENCOURT_7258587 NIH_MGC_71 Homo sapiens cDNA clon... | 1707 | 0.0             | 99%        |              |
| AL574991.3                                  | AL574991 Homo sapiens PLACENTA COT 25-NORMALIZED Ho... | 1676 | 0.0             | 100%       |              |
| AL576223.3                                  | AL576223 Homo sapiens PLACENTA COT 25-NORMALIZED Ho... | 1661 | 0.0             | 99%        |              |
| AL570884.3                                  | AL570884 Homo sapiens PLACENTA COT 25-NORMALIZED Ho... | 1655 | 0.0             | 99%        |              |
| AL570428.3                                  | AL570428 Homo sapiens PLACENTA COT 25-NORMALIZED Ho... | 1655 | 0.0             | 99%        |              |
| AL576603.2                                  | AL576603 Homo sapiens PLACENTA COT 25-NORMALIZED Ho... | 1652 | 0.0             | 99%        |              |
| AL575425.3                                  | AL575425 Homo sapiens PLACENTA COT 25-NORMALIZED Ho... | 1644 | 0.0             | 99%        |              |
| AL576340.3                                  | AL576340 Homo sapiens PLACENTA COT 25-NORMALIZED Ho... | 1642 | 0.0             | 99%        |              |
| BM555842.1                                  | AGENCOURT_6544353 NIH_MGC_88 Homo sapiens cDNA clon... | 1639 | 0.0             | 99%        |              |
| AL553095.3                                  | AL553095 Homo sapiens PLACENTA COT 25-NORMALIZED Ho... | 1615 | 0.0             | 98%        |              |

ALIGNMENTS

|            |     |                                                                                                                                                        |     |
|------------|-----|--------------------------------------------------------------------------------------------------------------------------------------------------------|-----|
| Query      | 123 | AAAGGGCCTTGGAACATGATGAAGATACTCTAATTGAGATTTTGGCATAAAGAACTAACCAAGGATTAACAGGGTCTACAGAGAGGAAGTGAAGAGAGATCTGGCCAAAGACATAACCTCAGACACATCTGGAGATTTTCG          | 272 |
| BQ228162.1 | 25  | .....                                                                                                                                                  | 173 |
| AL574991.3 | 911 | .....                                                                                                                                                  | 763 |
| AL576223.3 | 911 | .....W.AAR.....                                                                                                                                        | 763 |
| AL570884.3 | 918 | .....                                                                                                                                                  | 770 |
| AL570428.3 | 916 | .....M.....                                                                                                                                            | 768 |
| AL576603.2 | 912 | .....WM.....                                                                                                                                           | 770 |
| AL575425.3 | 930 | .....R.....R.....                                                                                                                                      | 781 |
| AL576340.3 | 915 | .....RW.....                                                                                                                                           | 774 |
| BM555842.1 | 1   | .....                                                                                                                                                  | 132 |
| AL553095.3 | 917 | .....                                                                                                                                                  | 769 |
| Query      | 273 | GAACGCTTTGCTTTCTCTTGCTAAGGGTGACCGATCTGAGGACTTTGGTGTGAATGAAGACTTGGCTGATTGAGATGCCAGGGCCCTGTATGAAGCAGGAGAAAGGAGAAAGGGGACAGACGTAACGCTGTTCATACCATCCTTACCAC  | 422 |
| BQ228162.1 | 174 | .....                                                                                                                                                  | 323 |
| AL574991.3 | 762 | .....                                                                                                                                                  | 613 |
| AL576223.3 | 762 | .....                                                                                                                                                  | 613 |
| AL570884.3 | 769 | .....                                                                                                                                                  | 620 |
| AL570428.3 | 767 | .....R.....N.....                                                                                                                                      | 618 |
| AL576603.2 | 769 | .....                                                                                                                                                  | 620 |
| AL575425.3 | 780 | .....R.....B.....S.....T.....                                                                                                                          | 631 |
| AL576340.3 | 773 | .....                                                                                                                                                  | 624 |
| BM555842.1 | 133 | .....                                                                                                                                                  | 282 |
| AL553095.3 | 768 | .....                                                                                                                                                  | 619 |
| Query      | 423 | CAGAAGCTATCCACAACCTTCGCAGAGTGTTCAGAAATACACCAAGTACAGTAAAGCATGACATGAACAAGTTCTGGACCTGGAGTTGAAAGGTGACATTGAGAAATGCCTCACAGCTATCGTGAAGTGGGCCACAAGCAACAGCTTT   | 572 |
| BQ228162.1 | 324 | .....                                                                                                                                                  | 473 |
| AL574991.3 | 612 | .....                                                                                                                                                  | 463 |
| AL576223.3 | 612 | .....                                                                                                                                                  | 463 |
| AL570884.3 | 619 | .....                                                                                                                                                  | 470 |
| AL570428.3 | 617 | .....A.....                                                                                                                                            | 468 |
| AL576603.2 | 619 | .....N.....                                                                                                                                            | 470 |
| AL575425.3 | 630 | .....N.....N.....                                                                                                                                      | 481 |
| AL576340.3 | 623 | .....                                                                                                                                                  | 474 |
| BM555842.1 | 283 | .....                                                                                                                                                  | 432 |
| AL553095.3 | 618 | .....                                                                                                                                                  | 469 |
| Query      | 573 | CTTTGCAGAGAAGCTTCATCAAGCCATGAAAGGTGTGGAACCTGCCATAAGGCATTGATCAGGATTATGGTTTCCCGTTCTGAAATTGACATGAATGATATCAAAAGCATTCTATCAGAAGATGTATGGTATCTCCCTTTGCCAAGCCAT | 722 |
| BQ228162.1 | 474 | .....                                                                                                                                                  | 623 |
| AL574991.3 | 462 | .....W.....                                                                                                                                            | 313 |
| AL576223.3 | 462 | .....                                                                                                                                                  | 313 |
| AL570884.3 | 469 | .....                                                                                                                                                  | 320 |

```

AL570428.3 467 .....A.....T.....318
AL576603.2 469 .....320
AL575425.3 480 .....331
AL576340.3 473 .....324
BM555842.1 433 .....582
AL553095.3 468 ..V.....C.....V.....S..S.....RK..R..G..R.....319

Query      723 CCTGGATGAACCAAGGAGATTATGAGAAAATCCTGGTGGCTCTTTGTGGAGGAAACTAAACATTCCCTTGATGGTCTCAAGCTATGATCAGAAGACCTTAATTATATATTTTCATCCTATAAGCTTAATAGGAAAGTTTCTTCAACA 872
BQ228162.1 624 .....774

                                     \
                                     A

AL574991.3 312 .....Y.....163
AL576223.3 312 .....163
AL570884.3 319 .....170
AL570428.3 317 .....168
AL576603.2 319 .....170
AL575425.3 330 .....181
AL576340.3 323 .....R.....R.....174
BM555842.1 583 .....732
AL553095.3 318 .....K..G.....R.....169

Query      873 GGATTACAGTGTAGCTACCTACATGCTGAAAAATATAGCCTTTAAATCATTTTATATTATACTCTGTATAATAGAGATAAGTCCATTTTTTAAAAATGTTTTCCCAAACCATAAACCCCTATACAAGTTGTTCTAGTAACAATACAT 1022
BQ228162.1 775 .....925

                                     \
                                     G

AL574991.3 162 .....13
AL576223.3 162 .....B.....13
AL570884.3 169 .....RW...V.....N...N...W...18

                                     \
                                     N
                                     |
                                     N

AL570428.3 167 .....T.....18
AL576603.2 169 .....A.....19

                                     \
                                     C
                                     |
                                     N

AL575425.3 180 .....N.....31
AL576340.3 173 .....23

                                     \
                                     N
                                     |
                                     N

BM555842.1 733 .....888

                                     \
                                     A
                                     |
                                     C
                                     |
                                     C
                                     |
                                     N
                                     |
                                     C
                                     |
                                     N

AL553095.3 168 .....18

                                     \
                                     N

Query      1023 GAGAAAGATGCTCTATGTAGCTGAAAAATAAAATGACGTC 1060
BQ228162.1 926 .....965

      \      \
      G      A

AL574991.3 12 .....1
AL576223.3 12 .....1
AL570884.3 17 .....A.....1
AL570428.3 17 .....1
AL576603.2 18 .....1
AL575425.3 30 .....G.....17
AL576340.3 22 .....5
BM555842.1 889 .....922

      \      \      \
      A      C      G

AL553095.3 17 .....G..1

Query= T3-20 [organism=Homo sapiens] anxl
Length=1346

```

| Sequences producing significant alignments:                       | Score<br>(Bits) | E<br>Value | Max<br>ident |
|-------------------------------------------------------------------|-----------------|------------|--------------|
| BQ228162.1 AGENCOURT 7258587 NIH MGC 71 Homo sapiens cDNA clon... | 1607            | 0.0        | 99%          |
| AL576603.2 AL576603 Homo sapiens PLACENTA COT 25-NORMALIZED Ho... | 1583            | 0.0        | 100%         |
| AL576340.3 AL576340 Homo sapiens PLACENTA COT 25-NORMALIZED Ho... | 1581            | 0.0        | 100%         |
| AL576223.3 AL576223 Homo sapiens PLACENTA COT 25-NORMALIZED Ho... | 1580            | 0.0        | 100%         |

|            |                                                         |      |     |      |
|------------|---------------------------------------------------------|------|-----|------|
| AL574991.3 | AL574991 Homo sapiens PLACENTA COT 25-NORMALIZED Ho...  | 1576 | 0.0 | 100% |
| BM555842.1 | AGENCOCURT_6544353 NIH_MGC_88 Homo sapiens cDNA clon... | 1570 | 0.0 | 99%  |
| AL570428.3 | AL570428 Homo sapiens PLACENTA COT 25-NORMALIZED Ho...  | 1559 | 0.0 | 99%  |
| AL570884.3 | AL570884 Homo sapiens PLACENTA COT 25-NORMALIZED Ho...  | 1555 | 0.0 | 99%  |
| AL575425.3 | AL575425 Homo sapiens PLACENTA COT 25-NORMALIZED Ho...  | 1543 | 0.0 | 99%  |
| BE614257.1 | 601504294T1 NIH_MGC_71 Homo sapiens cDNA clone IMAG...  | 1528 | 0.0 | 99%  |

ALIGNMENTS

|            |      |                                                                                                                                                     |     |
|------------|------|-----------------------------------------------------------------------------------------------------------------------------------------------------|-----|
| Query      | 324  | TCTAACTAAGCGAAACAATGCACAGCGTCAACAGATCAAAGCAGCATATCTCCAGGAAACAGGAAAGCCCTGGATGAACACTGAAGAAAGCCCTTACAGGTACCTTTGAGGAGGTGTTTGTAGCTCTGCTAAAAACAAGAAATCAGA | 473 |
| BQ228162.1 | 79   |                                                                                                                                                     | 93  |
| AL576603.2 | 864  |                                                                                                                                                     | 850 |
| AL576340.3 | 868  |                                                                                                                                                     | 854 |
| AL576223.3 | 857  |                                                                                                                                                     | 843 |
| AL574991.3 | 857  |                                                                                                                                                     | 843 |
| BM555842.1 | 38   |                                                                                                                                                     | 52  |
| AL570428.3 | 862  |                                                                                                                                                     | 848 |
| AL570428.3 | 1088 | .....-T.....-.....T.....-A.....-W.....-.....GC.....Y.....                                                                                           | 957 |
| AL570884.3 | 864  |                                                                                                                                                     | 850 |
| AL575425.3 | 875  |                                                                                                                                                     | 861 |
| AL575425.3 | 1037 | .....-.....-.....M.....M.....KG.....C.....                                                                                                          | 970 |
| BE614257.1 | 871  |                                                                                                                                                     | 862 |

|            |     |                                                                                                                                                           |     |
|------------|-----|-----------------------------------------------------------------------------------------------------------------------------------------------------------|-----|
| Query      | 474 | GACATTAAACAGGGTCTACAGAGAGGAACCTGAAGAGAGATCTGGCCAAAGACATAACCTCAGACACATCTGGAGATTTTCGGAACGCTTTTGCTTTCTCTTGCTAAGGGTGACCGATCTGAGGACTTTGGTGTGAATGAAGACTTGGCTGAT | 623 |
| BQ228162.1 | 94  |                                                                                                                                                           | 243 |
| AL576603.2 | 849 |                                                                                                                                                           | 700 |
| AL576340.3 | 853 |                                                                                                                                                           | 704 |
| AL576223.3 | 842 |                                                                                                                                                           | 693 |
| AL574991.3 | 842 |                                                                                                                                                           | 693 |
| BM555842.1 | 53  |                                                                                                                                                           | 202 |
| AL570428.3 | 847 | .....W.....                                                                                                                                               | 698 |
| AL570884.3 | 849 |                                                                                                                                                           | 700 |
| AL575425.3 | 860 | R.....R.....R.....B.....S.....                                                                                                                            | 711 |
| BE614257.1 | 861 | .....-.....A.T.....A.....C.....-.....                                                                                                                     | 713 |

|  |   |   |
|--|---|---|
|  | \ | \ |
|  |   |   |
|  | A | G |

|            |     |                                                                                                                                                    |     |
|------------|-----|----------------------------------------------------------------------------------------------------------------------------------------------------|-----|
| Query      | 624 | TCAGATGCCAGGCGCTTGTATGAAGCAGGAGAAAGGAGAAAGGGGACAGACGTAACCGTGTTCATACCATCTTACCACCAGAAGCTATCCAACTTCGCAGAGTGTTTCAGAAATACACCAAGTACAGTAAGCATGACATGAACAAA | 773 |
| BQ228162.1 | 244 |                                                                                                                                                    | 393 |
| AL576603.2 | 699 |                                                                                                                                                    | 550 |
| AL576340.3 | 703 |                                                                                                                                                    | 554 |
| AL576223.3 | 692 |                                                                                                                                                    | 543 |
| AL574991.3 | 692 |                                                                                                                                                    | 543 |
| BM555842.1 | 203 |                                                                                                                                                    | 352 |
| AL570428.3 | 697 | .....N.....                                                                                                                                        | 548 |
| AL570884.3 | 699 |                                                                                                                                                    | 550 |
| AL575425.3 | 710 | .....T.....                                                                                                                                        | 561 |
| BE614257.1 | 712 |                                                                                                                                                    | 563 |

|            |     |                                                                                                                                                         |     |
|------------|-----|---------------------------------------------------------------------------------------------------------------------------------------------------------|-----|
| Query      | 774 | GTTCTGGACCTGGAGTTGAAAGGTGACATTGAGAAATGCCTCACAGCTATCGTGAAGTGCGCCACAAGCAAAACGAGCTTTCTTTGCAGAGAAGCTTCATCAAGCCATGAAAGGTGTTGGAACTCGCCATAAGGCATTGATCAGGATTATG | 923 |
| BQ228162.1 | 394 |                                                                                                                                                         | 543 |
| AL576603.2 | 549 |                                                                                                                                                         | 400 |
| AL576340.3 | 553 |                                                                                                                                                         | 404 |
| AL576223.3 | 542 |                                                                                                                                                         | 393 |
| AL574991.3 | 542 |                                                                                                                                                         | 393 |
| BM555842.1 | 353 |                                                                                                                                                         | 502 |
| AL570428.3 | 547 |                                                                                                                                                         | 398 |
| AL570884.3 | 549 | .....N.....                                                                                                                                             | 400 |
| AL575425.3 | 560 |                                                                                                                                                         | 411 |
| BE614257.1 | 562 |                                                                                                                                                         | 413 |

|            |     |                                                                                                                                                     |      |
|------------|-----|-----------------------------------------------------------------------------------------------------------------------------------------------------|------|
| Query      | 924 | GTTTCCCGTTCTGAAATTGACATGAATGATATCAAAGCATTCTATCAGAAGATGTATGGTATCTCCCTTTGCCAAGCCATCTGGATGAAACCAAGGAGATTATGAGAAATCCTGGTGGCTCTTTGTGGAGGAACTAAACATTCCTCT | 1073 |
| BQ228162.1 | 544 |                                                                                                                                                     | 693  |
| AL576603.2 | 399 |                                                                                                                                                     | 250  |
| AL576340.3 | 403 | .....R.....R.....                                                                                                                                   | 254  |
| AL576223.3 | 392 |                                                                                                                                                     | 243  |
| AL574991.3 | 392 | .....W.....                                                                                                                                         | 243  |
| BM555842.1 | 503 |                                                                                                                                                     | 652  |
| AL570428.3 | 397 | .....A.....T.....                                                                                                                                   | 248  |
| AL570884.3 | 399 |                                                                                                                                                     | 250  |
| AL575425.3 | 410 |                                                                                                                                                     | 261  |
| BE614257.1 | 412 |                                                                                                                                                     | 263  |

|            |      |                                                                                                                                                       |      |
|------------|------|-------------------------------------------------------------------------------------------------------------------------------------------------------|------|
| Query      | 1074 | TGATGGTCTCAAGCTATGATCAGAAGACTTTAATTATATATTTTCATCCTATAAGCTTAAATAGGAAAGTTTCTTCAACAGGATTACAGTGTAGCTACCTACATGCTGAAAAATATAGCCTTTAAATCATTTTTATATTATACTCTGTA | 1223 |
| BQ228162.1 | 694  |                                                                                                                                                       | 844  |

|  |   |
|--|---|
|  | \ |
|  |   |
|  | A |

|            |     |  |     |
|------------|-----|--|-----|
| AL576603.2 | 249 |  | 100 |
| AL576340.3 | 253 |  | 104 |
| AL576223.3 | 242 |  | 93  |

|            |      |                                                                                                                           |      |
|------------|------|---------------------------------------------------------------------------------------------------------------------------|------|
| AL574991.3 | 242  | .....Y.....                                                                                                               | 93   |
| BM555842.1 | 653  | .....                                                                                                                     | 802  |
| AL570428.3 | 247  | .....                                                                                                                     | 98   |
| AL570884.3 | 249  | .....                                                                                                                     | 100  |
| AL575425.3 | 260  | .....N.....                                                                                                               | 111  |
| BE614257.1 | 262  | .....                                                                                                                     | 113  |
| Query      | 1224 | TAATAGAGATAAGTCCATTTTTTAAAAATGTTTTCCCAAAACCATAAAACCCCTATACAAGTTGTTCTAGTAACAATACATGAGAAAGATGTCTATGTAGTCTGAAAAATAAAATGACGTC | 1341 |
| BQ228162.1 | 845  | .....G.....                                                                                                               | 965  |
|            |      | \                  \                  \                                                                                   |      |
|            |      | G                  G                  A                                                                                   |      |
| AL576603.2 | 99   | .....A.....                                                                                                               | 1    |
|            |      |                                                                                                                           |      |
|            |      | C                                                                                                                         |      |
| AL576340.3 | 103  | .....                                                                                                                     | 5    |
|            |      |                                                                                                                           |      |
|            |      | N                                                                                                                         |      |
| AL576223.3 | 92   | .....B.....                                                                                                               | 1    |
| AL574991.3 | 92   | .....                                                                                                                     | 1    |
| BM555842.1 | 803  | .....                                                                                                                     | 922  |
|            |      | \          \          \          \          \          \          \                                                       |      |
|            |      | A          C          C          N          C          N          A          C          G                                 |      |
| AL570428.3 | 97   | .T.....                                                                                                                   | 1    |
| AL570884.3 | 99   | .....RW...V.....N...N...W...A.....                                                                                        | 1    |
|            |      |                                                                                                                           |      |
|            |      | N          N          N                                                                                                   |      |
| AL575425.3 | 110  | .....N...N...G.....                                                                                                       | 17   |
| BE614257.1 | 112  | .....T.A.....                                                                                                             | 6    |
|            |      |                                                                                                                           |      |
|            |      | T                                                                                                                         |      |

Query= T4-18 [organism=Homo sapiens] anxal

Length=1226

| Sequences producing significant alignments:                       |                 |            |              |
|-------------------------------------------------------------------|-----------------|------------|--------------|
|                                                                   | Score<br>(Bits) | E<br>Value | Max<br>ident |
| CB306442.1 UI-CF-EN1-aej-e-15-0-UI.s1 UI-CF-EN1 Homo sapiens c... | 1295            | 0.0        | 100%         |
| CA447733.1 UI-H-EI0-ayf-a-16-0-UI.s1 NCI_CGAP_EI0 Homo sapiens... | 1295            | 0.0        | 100%         |
| CA447223.1 UI-H-EI0-ayd-b-19-0-UI.s1 NCI_CGAP_EI0 Homo sapiens... | 1295            | 0.0        | 100%         |
| CA419844.1 UI-H-FH0-bcm-d-16-0-UI.s1 NCI_CGAP_FH0 Homo sapiens... | 1295            | 0.0        | 100%         |
| CA417462.1 UI-H-FE0-bbw-c-13-0-UI.s1 NCI_CGAP_FE0 Homo sapiens... | 1295            | 0.0        | 100%         |
| CA415613.1 UI-H-EZ0-bay-p-10-0-UI.s1 NCI_CGAP_Ch1 Homo sapiens... | 1295            | 0.0        | 100%         |
| CA414702.1 UI-H-EZ0-bar-e-18-0-UI.s1 NCI_CGAP_Ch1 Homo sapiens... | 1295            | 0.0        | 100%         |
| BU633206.1 UI-H-FL1-bgt-f-12-0-UI.s1 NCI_CGAP_FL1 Homo sapiens... | 1295            | 0.0        | 100%         |
| BQ776306.1 UI-H-FH0-bcn-i-12-0-UI.s1 NCI_CGAP_FH0 Homo sapiens... | 1295            | 0.0        | 100%         |
| BQ775850.1 UI-H-FH0-bcg-g-15-0-UI.s1 NCI_CGAP_FH0 Homo sapiens... | 1295            | 0.0        | 100%         |

#### ALIGNMENTS

|            |     |                                                                                                                                                       |     |
|------------|-----|-------------------------------------------------------------------------------------------------------------------------------------------------------|-----|
| Query      | 526 | AAGCAGGAGAAAGGAGAAAGGGGACAGCGTAAACGTGTTCAATACCATCCTTACCACCAGAAGCTATCCACAACCTTCGCAGAGTGTTTCAGAAATACACCAAGTACAGTAAAGTCTGGACCTGGAGTTGAAAG                | 675 |
| CB306442.1 | 719 | .....                                                                                                                                                 | 570 |
| CA447733.1 | 719 | .....                                                                                                                                                 | 570 |
| CA447223.1 | 719 | .....                                                                                                                                                 | 570 |
| CA419844.1 | 719 | .....                                                                                                                                                 | 570 |
| CA417462.1 | 716 | .....                                                                                                                                                 | 567 |
| CA415613.1 | 721 | .....                                                                                                                                                 | 572 |
| CA414702.1 | 721 | .....                                                                                                                                                 | 572 |
| BU633206.1 | 719 | .....                                                                                                                                                 | 570 |
| BQ776306.1 | 719 | .....                                                                                                                                                 | 570 |
| BQ775850.1 | 716 | .....                                                                                                                                                 | 567 |
| Query      | 676 | GTGACATTGAGAAATGCCTCACGCTATCGTGAAGTGCGCCACAAGCAAAACAGCTTTCTTTTCAGAGAAGCTTCATCAAGCCATGAAAGGTGTTGGAACTCGCCATAAGGCATTGATCAGGATTATGGTTTCCCGTTCTGAAATTGACA | 825 |
| CB306442.1 | 569 | .....                                                                                                                                                 | 420 |
| CA447733.1 | 569 | .....                                                                                                                                                 | 420 |
| CA447223.1 | 569 | .....                                                                                                                                                 | 420 |
| CA419844.1 | 569 | .....                                                                                                                                                 | 420 |
| CA417462.1 | 566 | .....                                                                                                                                                 | 417 |
| CA415613.1 | 571 | .....                                                                                                                                                 | 422 |
| CA414702.1 | 571 | .....                                                                                                                                                 | 422 |
| BU633206.1 | 569 | .....                                                                                                                                                 | 420 |
| BQ776306.1 | 569 | .....                                                                                                                                                 | 420 |
| BQ775850.1 | 566 | .....                                                                                                                                                 | 417 |

|            |     |                                                                                                                                                     |     |
|------------|-----|-----------------------------------------------------------------------------------------------------------------------------------------------------|-----|
| Query      | 826 | TGAATGATATCAAAAGCATTCATCAGAAGATGTATGGTATCTCCCTTTGCCAAGCCATCCTGGATGAAACCAAGGAGATTATGAGAAATCCTGGTGGCTCTTTGTGGAGGAACTAAACATTCCCTTGATGGTCTCAAGCTATGATCA | 975 |
| CB306442.1 | 419 | .....                                                                                                                                               | 270 |
| CA447733.1 | 419 | .....                                                                                                                                               | 270 |
| CA447223.1 | 419 | .....                                                                                                                                               | 270 |
| CA419844.1 | 419 | .....                                                                                                                                               | 270 |
| CA417462.1 | 416 | .....                                                                                                                                               | 267 |
| CA415613.1 | 421 | .....                                                                                                                                               | 272 |
| CA414702.1 | 421 | .....                                                                                                                                               | 272 |
| BU633206.1 | 419 | .....                                                                                                                                               | 270 |
| BQ776306.1 | 419 | .....                                                                                                                                               | 270 |
| BQ775850.1 | 416 | .....                                                                                                                                               | 267 |

|            |     |                                                                                                                                                       |      |
|------------|-----|-------------------------------------------------------------------------------------------------------------------------------------------------------|------|
| Query      | 976 | GAAGACTTTAATTATATATTTTCATCCTATAAGCTTAAATAGGAAAGTTTCTTCAACAGATTACAGTGTAGCTACCTACATGCTGAAAAATATAGCCTTTAAATCATTTTATATTTATAACTCTGTATAATAGAGATAAGTCCATTTTT | 1125 |
| CB306442.1 | 269 | .....                                                                                                                                                 | 120  |
| CA447733.1 | 269 | .....                                                                                                                                                 | 120  |
| CA447223.1 | 269 | .....                                                                                                                                                 | 120  |
| CA419844.1 | 269 | .....                                                                                                                                                 | 120  |
| CA417462.1 | 266 | .....                                                                                                                                                 | 117  |
| CA415613.1 | 271 | .....                                                                                                                                                 | 122  |
| CA414702.1 | 271 | .....                                                                                                                                                 | 122  |
| BU633206.1 | 269 | .....                                                                                                                                                 | 120  |
| BQ776306.1 | 269 | .....                                                                                                                                                 | 120  |
| BQ775850.1 | 266 | .....                                                                                                                                                 | 117  |

|            |      |                                                                                                        |      |
|------------|------|--------------------------------------------------------------------------------------------------------|------|
| Query      | 1126 | TAAAAATGTTTTCCCAAAACCAATAAACCCCTATACAAGTTGTCTAGTAACAATACATGAGAAAGATGTCTATGTAGCTGAAAAATAAAATGACGTCACAAG | 1226 |
| CB306442.1 | 119  | .....                                                                                                  | 19   |
| CA447733.1 | 119  | .....                                                                                                  | 19   |
| CA447223.1 | 119  | .....                                                                                                  | 19   |
| CA419844.1 | 119  | .....                                                                                                  | 19   |
| CA417462.1 | 116  | .....                                                                                                  | 16   |
| CA415613.1 | 121  | .....                                                                                                  | 21   |
| CA414702.1 | 121  | .....                                                                                                  | 21   |
| BU633206.1 | 119  | .....                                                                                                  | 19   |
| BQ776306.1 | 119  | .....                                                                                                  | 19   |
| BQ775850.1 | 116  | .....                                                                                                  | 16   |

Query= T5-22 [organism=Homo sapiens] anxl

Length=1238

| Sequences producing significant alignments:                       |                 |            |              |  |
|-------------------------------------------------------------------|-----------------|------------|--------------|--|
|                                                                   | Score<br>(Bits) | E<br>Value | Max<br>ident |  |
| CA446942.1 UI-H-ED0-aya-g-19-0-UI.s1 NCI_CGAP_ED0 Homo sapiens... | 1260            | 0.0        | 100%         |  |
| CA442733.1 UI-H-DP0-avr-a-19-0-UI.s1 NCI_CGAP_Fs1 Homo sapiens... | 1260            | 0.0        | 100%         |  |
| CA419750.1 UI-H-FH0-bcm-o-09-0-UI.s1 NCI_CGAP_FH0 Homo sapiens... | 1260            | 0.0        | 100%         |  |
| CA418232.1 UI-H-FH0-bcf-o-06-0-UI.s1 NCI_CGAP_FH0 Homo sapiens... | 1260            | 0.0        | 100%         |  |
| CA418210.1 UI-H-FH0-bcf-i-22-0-UI.s1 NCI_CGAP_FH0 Homo sapiens... | 1260            | 0.0        | 100%         |  |
| BU615320.1 UI-H-FH0-bcf-e-10-0-UI.s1 NCI_CGAP_FH0 Homo sapiens... | 1260            | 0.0        | 100%         |  |
| BQ774950.1 UI-H-FH0-bcd-n-16-0-UI.s1 NCI_CGAP_FH0 Homo sapiens... | 1260            | 0.0        | 100%         |  |
| BQ774641.1 UI-H-FH0-bcc-1-13-0-UI.s1 NCI_CGAP_FH0 Homo sapiens... | 1260            | 0.0        | 100%         |  |
| BQ774017.1 UI-H-FH0-bce-a-18-0-UI.s1 NCI_CGAP_FH0 Homo sapiens... | 1260            | 0.0        | 100%         |  |
| BQ773942.1 UI-H-FH0-bce-c-05-0-UI.s1 NCI_CGAP_FH0 Homo sapiens... | 1260            | 0.0        | 100%         |  |

ALIGNMENTS

|            |     |                                                                                                                                                     |     |
|------------|-----|-----------------------------------------------------------------------------------------------------------------------------------------------------|-----|
| Query      | 557 | GAGAAAGGGACAGCTAAACGTGTTCAATACCATCCTTACCACCAGAAGCTATCCACAACCTCGCAGAGTGTTTCAGAAATACACCAAGTACAGTAAGCATGACATGAACAAGTTCTGGACCTGGAGTTGAAAGGTGACATTGAGAAA | 706 |
| CA446942.1 | 705 | .....                                                                                                                                               | 556 |
| CA442733.1 | 705 | .....                                                                                                                                               | 556 |
| CA419750.1 | 705 | .....                                                                                                                                               | 556 |
| CA418232.1 | 705 | .....                                                                                                                                               | 556 |
| CA418210.1 | 702 | .....                                                                                                                                               | 553 |
| BU615320.1 | 705 | .....                                                                                                                                               | 556 |
| BQ774950.1 | 705 | .....                                                                                                                                               | 556 |
| BQ774641.1 | 705 | .....                                                                                                                                               | 556 |
| BQ774017.1 | 702 | .....                                                                                                                                               | 553 |
| BQ773942.1 | 705 | .....                                                                                                                                               | 556 |

|            |     |                                                                                                                                                      |     |
|------------|-----|------------------------------------------------------------------------------------------------------------------------------------------------------|-----|
| Query      | 707 | TGCTTCACAGCTATCGTGAAGTGCGCCACAAGCAAAACAGCTTTCTTTGCAGAGAAGCTTCATCAAGCCATGAAAGGTGTTGGAACCTGCCATAAGGCATTGATCAGATTATGGTTTCCCGTTCTGAAATTGACATGAATGATATCAA | 856 |
| CA446942.1 | 555 | .....                                                                                                                                                | 406 |
| CA442733.1 | 555 | .....                                                                                                                                                | 406 |
| CA419750.1 | 555 | .....                                                                                                                                                | 406 |
| CA418232.1 | 555 | .....                                                                                                                                                | 406 |
| CA418210.1 | 552 | .....                                                                                                                                                | 403 |
| BU615320.1 | 555 | .....                                                                                                                                                | 406 |
| BQ774950.1 | 555 | .....                                                                                                                                                | 406 |
| BQ774641.1 | 555 | .....                                                                                                                                                | 406 |
| BQ774017.1 | 552 | .....                                                                                                                                                | 403 |
| BQ773942.1 | 555 | .....                                                                                                                                                | 406 |

|       |     |                                                                                                                                                     |      |
|-------|-----|-----------------------------------------------------------------------------------------------------------------------------------------------------|------|
| Query | 857 | GCATTCTATCAGAAGATGTATGGTATCTCCCTTTGCCAAGCCATCCTGGATGAAACCAAGGAGATTATGAGAAATCCTGGTGGCTCTTTGTGGAGGAACTAAACATTCCCTTGATGGTCTCAAGCTATGATCAGAAGACTTTAATTA | 1006 |
|-------|-----|-----------------------------------------------------------------------------------------------------------------------------------------------------|------|

|            |     |       |     |
|------------|-----|-------|-----|
| CA446942.1 | 405 | ..... | 256 |
| CA442733.1 | 405 | ..... | 256 |
| CA419750.1 | 405 | ..... | 256 |
| CA418232.1 | 405 | ..... | 256 |
| CA418210.1 | 402 | ..... | 253 |
| BU615320.1 | 405 | ..... | 256 |
| BQ774950.1 | 405 | ..... | 256 |
| BQ774641.1 | 405 | ..... | 256 |
| BQ774017.1 | 402 | ..... | 253 |
| BQ773942.1 | 405 | ..... | 256 |

|            |      |                                                                                                                                                    |      |
|------------|------|----------------------------------------------------------------------------------------------------------------------------------------------------|------|
| Query      | 1007 | TATATTTTCATCCTTATAAGCTTAAATAGGAAAGTTCTTCAACAGGATTACAGTGTAGCTACCTACATGCTGAAAAATATAGCCTTTAAATCATTTTATATTATAACTCTGTATAATAGAGATAGTCCATTTTTAAAAATGTTTCC | 1156 |
| CA446942.1 | 255  | .....                                                                                                                                              | 106  |
| CA442733.1 | 255  | .....                                                                                                                                              | 106  |
| CA419750.1 | 255  | .....                                                                                                                                              | 106  |
| CA418232.1 | 255  | .....                                                                                                                                              | 106  |
| CA418210.1 | 252  | .....                                                                                                                                              | 103  |
| BU615320.1 | 255  | .....                                                                                                                                              | 106  |
| BQ774950.1 | 255  | .....                                                                                                                                              | 106  |
| BQ774641.1 | 255  | .....                                                                                                                                              | 106  |
| BQ774017.1 | 252  | .....                                                                                                                                              | 103  |
| BQ773942.1 | 255  | .....                                                                                                                                              | 106  |

|            |      |                                                                                       |      |
|------------|------|---------------------------------------------------------------------------------------|------|
| Query      | 1157 | CCAAACCATAAAACCCCTATACAAGTTGTCTTAGTAAACAATACATGAGAAAGATGTCTATGTAGCTGAAAAATAAAATGACGTC | 1238 |
| CA446942.1 | 105  | .....                                                                                 | 24   |
| CA442733.1 | 105  | .....                                                                                 | 24   |
| CA419750.1 | 105  | .....                                                                                 | 24   |
| CA418232.1 | 105  | .....                                                                                 | 24   |
| CA418210.1 | 102  | .....                                                                                 | 21   |
| BU615320.1 | 105  | .....                                                                                 | 24   |
| BQ774950.1 | 105  | .....                                                                                 | 24   |
| BQ774641.1 | 105  | .....                                                                                 | 24   |
| BQ774017.1 | 102  | .....                                                                                 | 21   |
| BQ773942.1 | 105  | .....                                                                                 | 24   |

Query= T6-14 [organism=Homo sapiens] anx1

Length=2854

| Sequences producing significant alignments:                       | Score<br>(Bits) | E<br>Value | Max<br>ident |
|-------------------------------------------------------------------|-----------------|------------|--------------|
| AL544959.3 AL544959 Homo sapiens PLACENTA COT 25-NORMALIZED Ho... | 1701            | 0.0        | 100%         |
| BX438944.2 BX438944 Homo sapiens PLACENTA Homo sapiens cDNA cl... | 1698            | 0.0        | 100%         |
| AL551427.3 AL551427 Homo sapiens PLACENTA COT 25-NORMALIZED Ho... | 1696            | 0.0        | 100%         |
| AL540651.3 AL540651 Homo sapiens PLACENTA Homo sapiens cDNA cl... | 1692            | 0.0        | 100%         |
| AL551980.3 AL551980 Homo sapiens PLACENTA COT 25-NORMALIZED Ho... | 1687            | 0.0        | 100%         |
| AL544231.3 AL544231 Homo sapiens PLACENTA COT 25-NORMALIZED Ho... | 1685            | 0.0        | 100%         |
| AL541874.3 AL541874 Homo sapiens PLACENTA Homo sapiens cDNA cl... | 1683            | 0.0        | 100%         |
| BU902298.1 AGENCOURT_10127317 NIH_MGC_71 Homo sapiens cDNA clo... | 1683            | 0.0        | 99%          |
| BU508007.1 AGENCOURT_10128424 NIH_MGC_71 Homo sapiens cDNA clo... | 1681            | 0.0        | 100%         |
| AL553114.3 AL553114 Homo sapiens PLACENTA COT 25-NORMALIZED Ho... | 1677            | 0.0        | 99%          |

ALIGNMENTS

|            |     |                                                                                                                                                     |     |
|------------|-----|-----------------------------------------------------------------------------------------------------------------------------------------------------|-----|
| Query      | 1   | AGTGTGAAATCTTCAGAGAAGAATTTCTCTTTAGTTCTTTGCAAGAGGTAGAGATAAAGACACTTTTTCAAAAATGGCAATGGTATCAGAATTCCTCANGCAGGCTGGTTTATTGAAAAATGAAGCAGGAATATGTTCAAACTGTGA | 150 |
| AL544959.3 | 1   | .....                                                                                                                                               | 142 |
| BX438944.2 | 1   | .....                                                                                                                                               | 133 |
| AL551427.3 | 1   | ..T.....                                                                                                                                            | 135 |
| AL540651.3 | 19  | ..T.....                                                                                                                                            | 151 |
| AL551980.3 | 22  | ..T.....                                                                                                                                            | 152 |
| AL544231.3 | 19  | ..T.....                                                                                                                                            | 151 |
| AL541874.3 | 1   | .....                                                                                                                                               | 125 |
| BU902298.1 | 24  | .....                                                                                                                                               | 164 |
|            |     | \                                                                                                                                                   |     |
|            |     | I                                                                                                                                                   |     |
|            |     | N                                                                                                                                                   |     |
| BU508007.1 | 1   | .....                                                                                                                                               | 131 |
|            |     | \                                                                                                                                                   |     |
|            |     | I                                                                                                                                                   |     |
|            |     | N                                                                                                                                                   |     |
| AL553114.3 | 107 | .....                                                                                                                                               | 256 |
| Query      | 151 | AGTCATCCAAAGGTGGTCCCGGATCAGCGGTGAGCCCCATCCTACCTTCAATCCATCCTCGGATGTCGCTGCTTGATAGGCCATAATGGTTAAAGGTGGATGAAGCAACCATCATTGACATTCTAACTAAGCGAAACAATGCAC    | 300 |
| AL544959.3 | 143 | .....                                                                                                                                               | 292 |
| BX438944.2 | 134 | .....                                                                                                                                               | 283 |
| AL551427.3 | 136 | .....                                                                                                                                               | 285 |
| AL540651.3 | 152 | .....                                                                                                                                               | 301 |
| AL551980.3 | 153 | .....                                                                                                                                               | 302 |
| AL544231.3 | 152 | .....                                                                                                                                               | 301 |
| AL541874.3 | 126 | .....                                                                                                                                               | 275 |



|            |      |                                                                                                                                                            |      |
|------------|------|------------------------------------------------------------------------------------------------------------------------------------------------------------|------|
| BU902298.1 | 165  | .....                                                                                                                                                      | 314  |
| BU508007.1 | 132  | .....                                                                                                                                                      | 281  |
| AL553114.3 | 257  | .....                                                                                                                                                      | 406  |
| Query      | 301  | AGCGTCAACAGATCAAAGCAGCATATCTCCAGGAAAAGGAAAGCCCTGGATGAAACACTGAAGAAAGCCCTTACAGGTCACCTTGAGGAGGTGTTTTAGCTCTGCTAAAAACTCAGCGCAATTTGATGCTGATGAACCTCGTGCTG         | 450  |
| AL544959.3 | 293  | .....                                                                                                                                                      | 442  |
| BX438944.2 | 284  | .....                                                                                                                                                      | 433  |
| AL551427.3 | 286  | .....                                                                                                                                                      | 435  |
| AL540651.3 | 302  | .....                                                                                                                                                      | 451  |
| AL551980.3 | 303  | .....                                                                                                                                                      | 452  |
| AL544231.3 | 302  | .....                                                                                                                                                      | 451  |
| AL541874.3 | 276  | .....                                                                                                                                                      | 425  |
| BU902298.1 | 315  | .....                                                                                                                                                      | 464  |
| BU508007.1 | 282  | .....                                                                                                                                                      | 431  |
| AL553114.3 | 407  | .....                                                                                                                                                      | 556  |
| Query      | 451  | CCATGAAGGGCCTTGGAACTGATGAAGATACTCTAATTGAGATTTTGGCATCAAGAACTAACAAAGAAATCAGAGACATTAACAGGGTCTACAGAGAGGAACTGAAGAGAGATCTGGCCAAAGACATAACCTCAGACACATCTGGAATT      | 600  |
| AL544959.3 | 443  | .....                                                                                                                                                      | 592  |
| BX438944.2 | 434  | .....                                                                                                                                                      | 583  |
| AL551427.3 | 436  | .....                                                                                                                                                      | 585  |
| AL540651.3 | 452  | .....                                                                                                                                                      | 601  |
| AL551980.3 | 453  | .....                                                                                                                                                      | 602  |
| AL544231.3 | 452  | .....                                                                                                                                                      | 601  |
| AL541874.3 | 426  | .....                                                                                                                                                      | 575  |
| BU902298.1 | 465  | .....                                                                                                                                                      | 614  |
| BU508007.1 | 432  | .....                                                                                                                                                      | 581  |
| AL553114.3 | 557  | .....                                                                                                                                                      | 706  |
| Query      | 601  | TTCGGAACGCTTTGCTTTCTCTTGCTAAGGGTGAACGATCTGAGGACTTTGGTGTAATGAAGACTTGGCTGATTTCAGATGCCAGGGCCCTGTATGAAGCAGGAGAAAGGAGAAAGGGGACAGACGTAAACGTGTTCAATACCATCCTTA     | 750  |
| AL544959.3 | 593  | .....                                                                                                                                                      | 742  |
| BX438944.2 | 584  | .....                                                                                                                                                      | 733  |
| AL551427.3 | 586  | .....                                                                                                                                                      | 735  |
| AL540651.3 | 602  | .....                                                                                                                                                      | 751  |
| AL551980.3 | 603  | .....                                                                                                                                                      | 752  |
| AL544231.3 | 602  | .....                                                                                                                                                      | 751  |
| AL541874.3 | 576  | .....                                                                                                                                                      | 725  |
| BU902298.1 | 615  | .....                                                                                                                                                      | 764  |
| BU508007.1 | 582  | .....                                                                                                                                                      | 731  |
| AL553114.3 | 707  | .....                                                                                                                                                      | 856  |
| Query      | 751  | CCACCAGAAGCTATCCACAACCTTCGACAGTGTTTCAGAAATACCAAGTACAGTAAGCATGACATGAACAAGTTCTGGACCTGGAGTTGAAAGGTGACATTGAGAAATGCCTCACAGCTATCGTGAAGTGCGCCACAAGCAAAACGAG       | 900  |
| AL544959.3 | 743  | .....M.....M.....                                                                                                                                          | 893  |
|            |      | $\begin{array}{c} \backslash \\   \\ T \end{array}$                                                                                                        |      |
| BX438944.2 | 734  | .....                                                                                                                                                      | 883  |
| AL551427.3 | 736  | .....                                                                                                                                                      | 885  |
| AL540651.3 | 752  | .....                                                                                                                                                      | 901  |
| AL551980.3 | 753  | .....M.....                                                                                                                                                | 902  |
| AL544231.3 | 752  | .....-.....                                                                                                                                                | 900  |
| AL541874.3 | 726  | .....                                                                                                                                                      | 875  |
| BU902298.1 | 765  | .....A.....TG.....                                                                                                                                         | 914  |
| BU508007.1 | 732  | .....                                                                                                                                                      | 881  |
| AL553114.3 | 857  | .....W.....-.....-.....                                                                                                                                    | 1003 |
| Query      | 901  | CTTCTTTGCAGAGAAGCTTCATCAAGCCATGAAAGTATGTACCATTCTACTTATATGTCCTGCTTAGAGGAAGAATTATTTGTAGAAGAACAGAAAACCTCATGTTGTTGAAAAATCTCACATTTAATATCTTCCCATTAATGAGAAT       | 1050 |
| AL544959.3 | 894  | .....                                                                                                                                                      | 929  |
| BX438944.2 | 884  | .....                                                                                                                                                      | 919  |
| AL551427.3 | 886  | .....                                                                                                                                                      | 921  |
| AL540651.3 | 902  | .....                                                                                                                                                      | 937  |
| AL551980.3 | 903  | .....                                                                                                                                                      | 938  |
| AL544231.3 | 901  | .....                                                                                                                                                      | 936  |
| AL541874.3 | 876  | .....                                                                                                                                                      | 911  |
| BU902298.1 | 915  | .....C.....                                                                                                                                                | 950  |
| BU508007.1 | 882  | .....-.....                                                                                                                                                | 916  |
| AL553114.3 | 1004 | .....-.....-.....M.....                                                                                                                                    | 1036 |
| Query      | 1051 | CATTGTCTTATTGTATGAAAAGAGTAATACACTACTTCTCAGAAATAAATCTCTGTAGATTTCGGTGCTtttttttACAGATGAGATTGTAAAGTGAGCTGTAAGTGATTTCACGGTCACCTTGTTGCTTAAAAATGTTGTCACACGGS      | 1200 |
| Query      | 1201 | AAGGTGATGTACTTCTTTTAACTGTAAATTTAGTGGCTACTTCTCTAAGGTGTGAGTTTATAATCTCCACCTTATGAGTCTGATTTGTGTTTATTATCTGTCTTTTATGCCACAGATTAATAGTTGAAACTTTGAAATG                | 1350 |
| Query      | 1351 | TCATTCTATGATTAAAGGATGTAGAATGATGATTTGAGATCAACTATGTCACCTTTAACTTTACTGTCTGACATGCATGGTATTATACAAGGTACCTCTTCTATTCTGACATTTTGAGCCCAAAATGAATAGTTATGAAGTTATCTTCCT     | 1500 |
| Query      | 1501 | TTTTCTTTGCAGCTCCAAAATAAGGAGGTTTTTAgagagagagagagAAGAAAGATCTAACTattttgaataaatatgaaggaatattttgaatatatatgaataatttgaataaatatgaaatgataGACATGCTAGGTACTGCTCTGTAGTG | 1650 |
| Query      | 1651 | GTTAGCATAGTTGCTGCCCTTTCTGCCATAGTCTAGTGTGATATTTCTGTTGGTAAATGATGAATACCTGGTGCCATGGAAGAGAAAGTGACATATATCTCCAGACTTTGGAAATCCAGGTAGCATTTGCTGTGAGCTAAATAACACCTG     | 1800 |
| Query      | 1801 | AAGTTTAAATAGAAATGAGCAGATGAGGCGAAGAGTGGAGAGATGGGATAAAGCAAGGGTGGTCCAAGAGGAAGAAGTAAACCCACACACAGGCTTGAAGGCAAAGGTAACATAACCTTCTCAAGACAGTAAGTATAGAGTATGATGGTGC    | 1950 |
| Query      | 1951 | ACACTGGAAGAGATGGTAGAATTAGGCAGGATATTGTAAGCCTTGAAAAAGAATTAGGCAGGATATCGGAAGCCCTGATTAGATTCTATCCTAAGAGCAACAGAAGTACCTGACAGTGTTTAAATAGATAGACTAGTTTATTAGATTGG      | 2100 |
| Query      | 2101 | CAGTTTAGAAGTTCCTtttttttGTAATTATTGGACAGTGTAGAGACCGGATGGTGAGAGATGAGTTAGGAAGTTGTGACAGCTCTCTATACCTACCGCTAATGTAGAGGATTATTATTATTTTCATTTCATTACCATTCGTGTAAGgtgtgt  | 2250 |

|            |      |                                                                                                                                                      |      |
|------------|------|------------------------------------------------------------------------------------------------------------------------------------------------------|------|
| Query      | 2401 | AACTCGCCATAAGGCATTGATCAGGATTATGGTTTCCCGTCTTGAATTGACATGAATGATATCAAGCATCTTATCAGAAGATGTATGGTATCTCCCTTTGCCAAGCCATCCTGGATGAAACCAAGGAGATTATGAGAAAACTCCTGGT | 2550 |
| BX438944.2 | 927  | R.....S.....D.....R=...Y.....W.KD=.Y.....Y...                                                                                                        | 1030 |

$\backslash$   
 $|$   
**G**

$\backslash$   
 $|$   
**A**

$\backslash$   
 $|$   
**T**

$\backslash$   
 $|$   
**AG**

Length=2231

## ALIGNMENTS

|            |     |                                                                                                                                                   |     |
|------------|-----|---------------------------------------------------------------------------------------------------------------------------------------------------|-----|
| Query      | 613 | TGCTGCTGTCAATAAGAATATGGTCTGATTGAAATGTACTAATATTTAACTGAACGTGTTAATGCCTAAATTTTATATATAATCTACTTTAAAAATAAGCCTTATGTCITTTATACCAAATAGAGTAGTTTCTAAAGCAATGAAA | 762 |
| BX417009.2 | 602 | .....                                                                                                                                             | 751 |

[illegible]

|            |      |                      |      |
|------------|------|----------------------|------|
| AL575425.3 | 1037 | .....M.....          | 1010 |
| AL553095.3 | 1020 | .....-R.....-YK..... | 994  |
| AL576340.3 | 1011 | .....G.....          | 987  |

|            |      |                                                                                                                                                        |                                                                                                                                             |                             |                                                                       |                     |             |                  |                 |              |      |
|------------|------|--------------------------------------------------------------------------------------------------------------------------------------------------------|---------------------------------------------------------------------------------------------------------------------------------------------|-----------------------------|-----------------------------------------------------------------------|---------------------|-------------|------------------|-----------------|--------------|------|
| Query      | 1213 | CAGGTCACCTTGAGGAGGTTGTTT                                                                                                                               | TAGTCTCTGCTAAAAA                                                                                                                            | CTCCAGCGCAATTTGATGCTGATGAAC | TCGTGCTGCCATGAAGGGCCTT                                                | GGAAC               | TGATGAAGAT  | CTCTAATTGAGATTTT | GGCATCAAGAACTAA | CAAGAATCAGAG | 1362 |
| AL570428.3 | 996  | .....                                                                                                                                                  | .....                                                                                                                                       | .....                       | .....                                                                 | .....               | .....       | .....            | .....           | .....        | 847  |
| AL574991.3 | 989  | .CR.....                                                                                                                                               | .....K.....                                                                                                                                 | .....                       | .....                                                                 | .....               | .....       | .....            | .....           | .....        | 842  |
| AL576223.3 | 987  | ...D...WR.....                                                                                                                                         | ...A...V.....                                                                                                                               | .....                       | .....                                                                 | .....               | .....       | .....            | W...AAR.....    | .....        | 842  |
| AL570884.3 | 998  | ...Y.M...R...T...K...YY...S.W...C.....                                                                                                                 | .....                                                                                                                                       | .....                       | .....                                                                 | K...S.....          | .....       | .....            | .....           | .....        | 849  |
| AL575425.3 | 1009 | ...M.....                                                                                                                                              | .....KG.....C.....                                                                                                                          | .....                       | .....                                                                 | C.C...S...A.....    | .....       | .....            | .....           | .....        | 860  |
| AL553095.3 | 993  | .....                                                                                                                                                  | .....                                                                                                                                       | .....                       | .....                                                                 | .....               | .....       | .....            | .....           | .....        | 848  |
| BQ228162.1 | 12   | .....                                                                                                                                                  | .....                                                                                                                                       | .....                       | .....                                                                 | .....               | .....       | .....            | .....           | .....        | 94   |
| AL576340.3 | 986  | .....Y.....                                                                                                                                            | .....                                                                                                                                       | .....                       | .....                                                                 | .....               | .....       | .....            | .....           | .....        | 853  |
| AL576603.2 | 917  | .....                                                                                                                                                  | .....                                                                                                                                       | .....                       | .....                                                                 | .....               | .....       | .....            | .....           | .....        | 849  |
| Query      | 1363 | ACATTAA                                                                                                                                                | CAGGGCTACAGAGAGAACTGAAGAGAGATCTGGCCAAAGACATAACCTCAGACACATCTGGAGATTTTCGGAACGCTTTGCTTTCTCTGCTAAGGGTGACCGATCTGAGGACTTTGGTGGAATGAAGACTTGGCTGATT | 1512                        |                                                                       |                     |             |                  |                 |              |      |
| AL570428.3 | 846  | .....                                                                                                                                                  | W.....                                                                                                                                      | .....                       | .....                                                                 | .....               | .....       | .....            | .....           | .....        | 697  |
| AL574991.3 | 841  | .....                                                                                                                                                  | .....                                                                                                                                       | .....                       | .....                                                                 | .....               | .....       | .....            | .....           | .....        | 692  |
| AL576223.3 | 841  | .....                                                                                                                                                  | .....                                                                                                                                       | .....                       | .....                                                                 | .....               | .....       | .....            | .....           | .....        | 699  |
| AL570884.3 | 848  | .....                                                                                                                                                  | .....                                                                                                                                       | .....                       | .....                                                                 | .....               | .....       | .....            | .....           | .....        | 699  |
| AL575425.3 | 859  | .....                                                                                                                                                  | .....                                                                                                                                       | .....                       | .....                                                                 | .....               | .....       | .....            | .....           | .....        | 710  |
| AL553095.3 | 847  | .....                                                                                                                                                  | .....                                                                                                                                       | .....                       | .....                                                                 | .....               | .....       | .....            | .....           | .....        | 698  |
| BQ228162.1 | 95   | .....                                                                                                                                                  | .....                                                                                                                                       | .....                       | .....                                                                 | .....               | .....       | .....            | .....           | .....        | 244  |
| AL576340.3 | 852  | .....                                                                                                                                                  | .....                                                                                                                                       | .....                       | .....                                                                 | .....               | .....       | .....            | .....           | .....        | 703  |
| AL576603.2 | 848  | .....                                                                                                                                                  | .....                                                                                                                                       | .....                       | .....                                                                 | .....               | .....       | .....            | .....           | .....        | 699  |
| Query      | 1513 | CAGATGCCAGGGCCTTGATGAAGCAGGAGAAAGGAGAAAGGGGACAGACGTAAACGTTGTCATACCACCTCTTACCACCAAGACTATCCACAACCTTCGACAGAGTGTTTCAGAAATACACCAAGTACAGTAAGCATGACATGAACAAAG | 1662                                                                                                                                        |                             |                                                                       |                     |             |                  |                 |              |      |
| AL570428.3 | 696  | .....                                                                                                                                                  | .....                                                                                                                                       | .....                       | .....                                                                 | N.....              | .....       | .....            | .....           | A.....       | 547  |
| AL574991.3 | 691  | .....                                                                                                                                                  | .....                                                                                                                                       | .....                       | .....                                                                 | .....               | .....       | .....            | .....           | .....        | 542  |
| AL576223.3 | 691  | .....                                                                                                                                                  | .....                                                                                                                                       | .....                       | .....                                                                 | .....               | .....       | .....            | .....           | .....        | 542  |
| AL570884.3 | 698  | .....                                                                                                                                                  | .....                                                                                                                                       | .....                       | .....                                                                 | .....               | .....       | .....            | .....           | .....        | 549  |
| AL575425.3 | 709  | .....                                                                                                                                                  | .....                                                                                                                                       | .....                       | .....                                                                 | .....               | .....       | .....            | .....           | .....        | 560  |
| AL553095.3 | 697  | .....                                                                                                                                                  | .....                                                                                                                                       | .....                       | .....                                                                 | T.....              | .....       | .....            | .....           | N.....       | 548  |
| BQ228162.1 | 245  | .....                                                                                                                                                  | .....                                                                                                                                       | .....                       | .....                                                                 | .....               | .....       | .....            | .....           | .....        | 394  |
| AL576340.3 | 702  | .....                                                                                                                                                  | .....                                                                                                                                       | .....                       | .....                                                                 | .....               | .....       | .....            | .....           | .....        | 553  |
| AL576603.2 | 698  | .....                                                                                                                                                  | .....                                                                                                                                       | .....                       | .....                                                                 | .....               | .....       | .....            | .....           | .....        | 549  |
| Query      | 1663 | TTCTGGACCTGGAGTTGAAAGGTGACATTGAGAAATGCCTCACAGCTATCTGTAAGTGCGCCACAAGCAAAACAGCTTTCTTTGACAGAGAAGCTTCATCAAGCCATGAAAGGTGTTGGAAC                             | 1812                                                                                                                                        |                             |                                                                       |                     |             |                  |                 |              |      |
| AL570428.3 | 546  | .....                                                                                                                                                  | .....                                                                                                                                       | .....                       | .....                                                                 | .....               | .....       | .....            | .....           | .....        | 397  |
| AL574991.3 | 541  | .....                                                                                                                                                  | .....                                                                                                                                       | .....                       | .....                                                                 | .....               | .....       | .....            | .....           | .....        | 392  |
| AL576223.3 | 541  | .....                                                                                                                                                  | .....                                                                                                                                       | .....                       | .....                                                                 | .....               | .....       | .....            | .....           | .....        | 392  |
| AL570884.3 | 548  | .....                                                                                                                                                  | .....                                                                                                                                       | .....                       | .....                                                                 | .....               | .....       | .....            | .....           | .....        | 399  |
| AL575425.3 | 559  | .....                                                                                                                                                  | .....                                                                                                                                       | .....                       | .....                                                                 | N.....              | .....       | .....            | .....           | .....        | 410  |
| AL553095.3 | 547  | .....                                                                                                                                                  | .....                                                                                                                                       | .....                       | .....                                                                 | .....               | YY...V..... | .....            | C.....          | .....        | 398  |
| BQ228162.1 | 395  | .....                                                                                                                                                  | .....                                                                                                                                       | .....                       | .....                                                                 | .....               | .....       | .....            | .....           | V.....       | 544  |
| AL576340.3 | 552  | .....                                                                                                                                                  | .....                                                                                                                                       | .....                       | .....                                                                 | .....               | .....       | .....            | .....           | .....        | 403  |
| AL576603.2 | 548  | .....                                                                                                                                                  | .....                                                                                                                                       | .....                       | .....                                                                 | .....               | .....       | .....            | .....           | .....        | 399  |
| Query      | 1813 | TTTCCCGTTCTGAAATTGACATGAATGATATCAAGACATCTATCAGAAGATGATGGTATCTCCCTTTGCCAAGCCATCTGGATGAACCAAGGAGATTATGAGAAATCCTGGTGGCTCTTTGTGGAGGAAACTAAACATTCCCTT       | 1962                                                                                                                                        |                             |                                                                       |                     |             |                  |                 |              |      |
| AL570428.3 | 396  | .....                                                                                                                                                  | .....                                                                                                                                       | .....                       | .....                                                                 | A.....              | .....       | .....            | .....           | .....        | 247  |
| AL574991.3 | 391  | .....                                                                                                                                                  | .....                                                                                                                                       | .....                       | .....                                                                 | .....               | .....       | .....            | .....           | .....        | 242  |
| AL576223.3 | 391  | .....                                                                                                                                                  | .....                                                                                                                                       | .....                       | .....                                                                 | .....               | .....       | .....            | .....           | .....        | 242  |
| AL570884.3 | 398  | .....                                                                                                                                                  | .....                                                                                                                                       | .....                       | .....                                                                 | .....               | .....       | .....            | .....           | .....        | 249  |
| AL575425.3 | 409  | .....                                                                                                                                                  | .....                                                                                                                                       | .....                       | .....                                                                 | .....               | .....       | .....            | .....           | .....        | 260  |
| AL553095.3 | 397  | .....                                                                                                                                                  | .....                                                                                                                                       | S...S.....                  | .....                                                                 | RK...R...G...R..... | .....       | K...G.....       | .....           | R.....       | 248  |
| BQ228162.1 | 545  | .....                                                                                                                                                  | .....                                                                                                                                       | .....                       | .....                                                                 | .....               | .....       | .....            | .....           | .....        | 694  |
| AL576340.3 | 402  | .....                                                                                                                                                  | .....                                                                                                                                       | .....                       | .....                                                                 | .....               | .....       | R.....           | .....           | R.....       | 253  |
| AL576603.2 | 398  | .....                                                                                                                                                  | .....                                                                                                                                       | .....                       | .....                                                                 | .....               | .....       | .....            | .....           | .....        | 249  |
| Query      | 1963 | GATGGTCTCAAGCTATGATCAGAAGACTTTAATTATATATTTTCATCCTATAAGCTTAAATAGGAAGTTTCTTCAACAGGATTACAGTGTAGCTACCTACATGCTGAAAAATATAGCCTTTAAATCATTTTATATATAACTCTGTAT    | 2229                                                                                                                                        |                             |                                                                       |                     |             |                  |                 |              |      |
| AL570428.3 | 246  | .....                                                                                                                                                  | .....                                                                                                                                       | .....                       | .....                                                                 | .....               | .....       | .....            | .....           | .....        | 97   |
| AL574991.3 | 241  | .....                                                                                                                                                  | Y.....                                                                                                                                      | .....                       | .....                                                                 | .....               | .....       | .....            | .....           | .....        | 92   |
| AL576223.3 | 241  | .....                                                                                                                                                  | .....                                                                                                                                       | .....                       | .....                                                                 | .....               | .....       | .....            | .....           | .....        | 92   |
| AL570884.3 | 248  | .....                                                                                                                                                  | .....                                                                                                                                       | .....                       | .....                                                                 | .....               | .....       | .....            | .....           | .....        | 99   |
| AL575425.3 | 259  | .....                                                                                                                                                  | .....                                                                                                                                       | .....                       | .....                                                                 | .....               | .....       | .....            | .....           | .....        | 110  |
| AL553095.3 | 247  | .....                                                                                                                                                  | .....                                                                                                                                       | .....                       | .....                                                                 | .....               | .....       | .....            | N.....          | .....        | 98   |
| BQ228162.1 | 695  | .....                                                                                                                                                  | .....                                                                                                                                       | .....                       | .....                                                                 | .....               | .....       | .....            | .....           | .....        | 845  |
| AL576340.3 | 252  | .....                                                                                                                                                  | .....                                                                                                                                       | .....                       | .....                                                                 | .....               | .....       | .....            | .....           | .....        | 103  |
| AL576603.2 | 248  | .....                                                                                                                                                  | .....                                                                                                                                       | .....                       | .....                                                                 | .....               | .....       | .....            | .....           | .....        | 99   |
| Query      | 2113 | AATAGAGATAAGTCCATTTTTT                                                                                                                                 | AAAAATGTTTTC                                                                                                                                | CCCAACCATAAAACCC            | TATACAAAGTTGTTCTAGTAACAATACATGAGAAAGATGCTCTATGTAGCTGAAAAATAAAATGACGTC | 2229                |             |                  |                 |              |      |
| AL570428.3 | 96   | T.....                                                                                                                                                 | .....                                                                                                                                       | .....                       | .....                                                                 | .....               | 1           |                  |                 |              |      |
| AL574991.3 | 91   | .....                                                                                                                                                  | .....                                                                                                                                       | .....                       | .....                                                                 | .....               | 1           |                  |                 |              |      |
| AL576223.3 | 91   | .....                                                                                                                                                  | .....                                                                                                                                       | .....                       | .....                                                                 | .....               | 1           |                  |                 |              |      |
| AL570884.3 | 98   | .....                                                                                                                                                  | .....                                                                                                                                       | RW...V.....                 | .....                                                                 | N...N...W...A.....  | 1           |                  |                 |              |      |
| AL575425.3 | 109  | .....                                                                                                                                                  | .....                                                                                                                                       | .....                       | .....                                                                 | .....               | .....       | .....            | .....           | .....        | 17   |
| AL553095.3 | 97   | .....                                                                                                                                                  | .....                                                                                                                                       | .....                       | .....                                                                 | .....               | .....       | .....            | .....           | .....        | 1    |

Query= T9-9 [organism=Homo sapiens] anxa1  
Length=2698

AL540651.3 451 ..... 600  
AL553679.3 441 ..... 590  
AL553164.3 452 ..... 601

Query 601 TTTCGGAACGCTTTGCTTTCTCTTGGCTAAGGGTGACCGATCTGAGGACTTTGGTGTGAATGAAGACTTGGCTGATTAGATGCCAGGGCCCTTGTATGAAGCAGGAGAAAGGAGAAAGGGGACAGACGTAACCGTGTCAATACCATCCCTT 750  
AL553114.3 706 ..... 855  
AL544959.3 592 ..... 741  
BM458053.1 610 ..... 759  
BX438944.2 583 ..... 732  
AL551427.3 585 ..... 734  
BU902298.1 614 ..... 763  
AL544231.3 601 ..... 750  
AL540651.3 601 ..... 750  
AL553679.3 591 ..... 740  
AL553164.3 602 ..... 751

Query 751 ACCACCAGAAGCTATCCACAACCTTCGACAGTGTTCAGAAATACACCAAGTACAGTAAGCATGACATGAACAAAGTTCTGGACCTGGAGTTGAAAGGTGACATTGAGAAATGCCTACAGCTATCGGTATGTAGTCCAGCAGTTGAAAG 900  
AL553114.3 856 ..... 981  
AL544959.3 742 ..... 869

BM458053.1 760 ..... 889

AL553164.3 752 ..... 877

Query 901 AGTTTTCTAAGTAAATTTGATTTTCAAAGCTATCCTATACTTaaacaagaacaacagcaacaaaaccaataaaagaaaaacaaaaacaaTCAGAAGTAGTGATCTGTTTCAATTGAAGCAACGTAAAAGATTGGCAAAGTACTATAAC 1050

Query 1051 CTTAATAACAATAGATATTATTCCCTTTTCAAAAATAGAGAGATAGACTATACTTTATTGAGCACCTACTTATATCAAACAATGTACAGGCTGGGCACACCACAGAGGCAATTCAGAATGGTCACTGAGAGCATGGGATCTGGAATA 1200

Query 1201 AATGTAACATCTGGATAAATGTAACCTCAAGTCCTGGTCTACTGCTTGTAAATTGTACAATCTTGGGAGGTCCAGGAGAGTCTGATTAGTGGGTCGAGTTGGCCTCTAAAAATCGGTACTTTTTAAAGATCTCCAGGTTATTCAGA 1350

Query 1351 CAACCATCAGGGTTGGGGAACCTATGTTCTCAAGCAGTGTCTCTCATTCAGTACTATGCACCTGAATCCCTGGAAAGCTTGTAAATGCAGATTCTGATTCCTCCAGGTCTGGGGTGAGCTTAGATTCTGCTTTTCTAACAGCTCCC 1500

Query 1501 CATTGATGCCAATGCTGTTGGTCCATAGATCTCGACAAGATGAAGAACACTATGAACTGGAATGTGCTAGTATTATTTGGGTTCTGTTTTATTTTAAAGCCCATCCTATCCAGAGttttttcttcaatttattcaatttttttaattat 1650

Query 1651 ttgtttgtGCAACTCTTACTTTAGACACAGAGGTACATGTGCACGTTTGTTCATGGGTGTTCTGCACCTCAGGCAGTGAGCATAGTACCCAATAAGTAGTTTTTTGACCAATGCCCTTCTCTCCCTGCCCTCTCTAGTAGTCTGCAGTG 1800

Query 1801 TCTGTTGTTCATAGGGTGTCTTTTTAAATGTTCTTATAGTAACATAAATAAAGATTATTACATAGGCTTGAACACCTAGTGGCTTCTCCACTCCCAAGGAGATATATGTTGGATAGCGCAACTACTGAAGTTGCTCTTGAGATGTATT 1950

Query 1951 TAAGGTAATaaaaaaTTGATCGTCAGGGAAGAATATTCAAACCACCATCTAGAGAGTCACAAACTCTCTCAGAAGTTAACTGCCCTATATTGGGAGATGAGAGGTGAAGATGATGATGAGGGATAGAACACTGTGTGGCAAAAT 2100

Query 2101 TCTATATTTCTGTTCTTTTCATATGGATATTTTCATTTTTTCATGGTAAATACATCAACTAAAATTTTCTCTCTAACAGTGAAGTGGCCACAAGCAAAACAGCTTTCTTTTGACAGAGAAGCTTCATCAAGCCATGAAAGGTGTTGGAAC 2250  
AL544959.3 869 ..... 939  
BX438944.2 859 ..... 929  
AL551427.3 861 ..... 930  
BU902298.1 894 ..... 960  
AL544231.3 877 ..... 946  
AL540651.3 877 ..... 937  
AL553164.3 877 ..... 936

Query 2251 TCGCCATAAGGCATTGATCAGGATTATGGTTTCCCGTTCTGAAATGACATGAATGATATCAAAGCATTCTATCAGAAGATGTATGGTATCTCCCTTTGCCAAGCCATCCTGGATGAACCAAAAGGAGATTATGAGAAATCCTGGTGGC 2400  
AL544959.3 940 ..... 983  
BX438944.2 930 ..... 1030

AL551427.3 931 ..... 1038  
BU902298.1 961 ..... 1116

AL544231.3 947 ..... 1089

Query 2401 TCTTTGTGGAGGAACTAAACATTCCCTTGA 2431  
BU902298.1 1118 ..... 1152

AL544231.3 1090 ..... 1102

Query= T10-C\* [organism=Homo sapiens] anxa1

Length=1518

Sequences producing significant alignments:

|                                                                   | Score<br>(Bits) | E<br>Value | Max<br>ident |
|-------------------------------------------------------------------|-----------------|------------|--------------|
| AL542692.3 AL542692 Homo sapiens PLACENTA Homo sapiens cDNA cl... | 1914            | 0.0        | 98%          |
| AL570428.3 AL570428 Homo sapiens PLACENTA COT 25-NORMALIZED Ho... | 1910            | 0.0        | 98%          |
| BU508007.1 AGENCOURT 10128424 NIH MGC 71 Homo sapiens cDNA clo... | 1858            | 0.0        | 98%          |
| AL544231.3 AL544231 Homo sapiens PLACENTA COT 25-NORMALIZED Ho... | 1834            | 0.0        | 98%          |
| AL576223.3 AL576223 Homo sapiens PLACENTA COT 25-NORMALIZED Ho... | 1831            | 0.0        | 98%          |
| AL570884.3 AL570884 Homo sapiens PLACENTA COT 25-NORMALIZED Ho... | 1825            | 0.0        | 97%          |
| AL574991.3 AL574991 Homo sapiens PLACENTA COT 25-NORMALIZED Ho... | 1810            | 0.0        | 98%          |
| AL541874.3 AL541874 Homo sapiens PLACENTA Homo sapiens cDNA cl... | 1792            | 0.0        | 99%          |
| DC631365.1 DC631365 macaque bone marrow cDNA library QbmA Maca... | 1788            | 0.0        | 94%          |
| AL575425.3 AL575425 Homo sapiens PLACENTA COT 25-NORMALIZED Ho... | 1788            | 0.0        | 98%          |

ALIGNMENTS

|            |      |                                                                                                                                                        |      |
|------------|------|--------------------------------------------------------------------------------------------------------------------------------------------------------|------|
| Query      | 1    | AGTGTGAAATCTTCAGAGAAGAATTTCTCTTTAGTTCTTTGCAAGAAGGTAGAGATAAAGAGTCTTGTTATGTGCGCCAGGATGGAGTGTAGTGGTACAATCTCGGCTCACTGCAGCCTCCGCCTCTTCTGGGTTCAAGTGATTCTCTCT | 150  |
| AL542692.3 | 19   | ..T.....                                                                                                                                               | 151  |
| BU508007.1 | 1    | .....                                                                                                                                                  | 41   |
| AL544231.3 | 19   | ..T.....                                                                                                                                               | 62   |
| AL541874.3 | 1    | .....                                                                                                                                                  | 36   |
| DC631365.1 | 1    | .....C.C.....                                                                                                                                          | 60   |
| Query      | 151  | GCCTCAGCCTCTCTGAGTAGATGGGACTACAGACACTTTTTCAAAAATGGCAATGGTATCAGAATTCCTCAAGCAGGCTGGTTTATTGAAAATGAAGAGCAGGAATATGTTCAAACTGTGAAGTCATCCAAAGGTGGTCCCGGATCAGCG | 300  |
| AL542692.3 | 152  | .....                                                                                                                                                  | 301  |
| BU508007.1 | 36   | ..A.....<br>\<br> <br>N                                                                                                                                | 160  |
| AL544231.3 | 57   | ..A.....                                                                                                                                               | 180  |
| AL541874.3 | 31   | ..A.....                                                                                                                                               | 154  |
| DC631365.1 | 55   | ..A.....A.....T.....A                                                                                                                                  | 178  |
| Query      | 301  | GTGAGCCCTTCTCTACCTTCAATCCATCCTCGGATGTCGCTGCCTGCATAAGGCCATAATGGTTAAAGGTGTGGATGAAGCAACCATCATTGACATTTCTAACTAAGCGAAACAATGCACAGCGTCAACAGATCAAAAGCAGCATATCTC | 450  |
| AL542692.3 | 302  | .....                                                                                                                                                  | 451  |
| AL570428.3 | 1088 | .....-T.....T.....A.....W.....                                                                                                                         | 1041 |
| BU508007.1 | 161  | .....                                                                                                                                                  | 310  |
| AL544231.3 | 181  | .....                                                                                                                                                  | 330  |
| AL576223.3 | 1050 | .....-W.....-R.....Y.....                                                                                                                              | 1030 |
| AL570884.3 | 1059 | .....T.....<br>\<br> <br>M                                                                                                                             | 1045 |
| AL541874.3 | 155  | .....                                                                                                                                                  | 304  |
| DC631365.1 | 179  | .....T.....C.....                                                                                                                                      | 328  |
| Query      | 451  | CAGGAAACAGGAAAGCCCTGGATGAAACACTGAAGAAAGCCCTTACAGGTACACCTTGAGGAGGTTGTTTGTAGCTCTGCTAAAACTCCAGCGCAATTTGATGCTGATGAACCTTCGTCTGCCATGAAGGGCCTTGGAACTGATGAAGAT | 600  |
| AL542692.3 | 452  | .....                                                                                                                                                  | 601  |
| AL570428.3 | 1040 | ...-.....GC.....-Y.....M.....                                                                                                                          | 893  |
| BU508007.1 | 311  | .....                                                                                                                                                  | 460  |
| AL544231.3 | 331  | .....                                                                                                                                                  | 480  |
| AL576223.3 | 1029 | ..-.....-R.....-D.....WR.....-A.....-V.....                                                                                                            | 888  |
| AL570884.3 | 1044 | .T.....C...Y...W...RS...W...Y.M...R...T...K...YY...S.W...C.....K...S.....                                                                              | 895  |
| AL574991.3 | 1017 | .....-R.....-K.....RS...-CR...Y.M...R...T...K...YY...S.W...C.....K...S.....                                                                            | 888  |
| AL541874.3 | 305  | .....TG.....G.....C.....                                                                                                                               | 454  |
| DC631365.1 | 329  | .....TG.....G.....C.....                                                                                                                               | 478  |
| AL575425.3 | 1037 | .....-.....M.....M.....KG.....C.....C.C...S...A.....                                                                                                   | 906  |
| Query      | 601  | ACTCTAATTGAGATTTTGGCATCAGAACTAAACAAGAAATCAGAGACATTAAACAGGGCTCTACAGAGAGAACTGAAGAGAGATCTGGCCAAGACATAACCTCAGACACATCTGGAGATTTTCGGAACGCTTTGCTTTCTCTGCTAAG   | 750  |
| AL542692.3 | 602  | .....                                                                                                                                                  | 751  |
| AL570428.3 | 892  | .....W.....                                                                                                                                            | 743  |
| BU508007.1 | 461  | .....                                                                                                                                                  | 610  |
| AL544231.3 | 481  | .....                                                                                                                                                  | 630  |
| AL576223.3 | 887  | ...W...AAR.....                                                                                                                                        | 738  |
| AL570884.3 | 894  | .....                                                                                                                                                  | 745  |
| AL574991.3 | 887  | .....                                                                                                                                                  | 738  |
| AL541874.3 | 455  | .....                                                                                                                                                  | 604  |
| DC631365.1 | 479  | ...G.....G.....                                                                                                                                        | 628  |
| AL575425.3 | 905  | .....R.....R.....                                                                                                                                      | 756  |
| Query      | 751  | GGTGACCGATCTGAGACTTTGGTGTGAATGAAGACTTTGGCTGATTTCAGATGCCAGGGCCTTGTATGAAGCAGGAGAAAGGAGAAAGGGGACAGACGTAAACGTGTTCATACCATCCTTACCACCAAGCTATCCACAACCTTCGCAGA  | 900  |
| AL542692.3 | 752  | .....R.....                                                                                                                                            | 901  |
| AL570428.3 | 742  | .....R.....N.....                                                                                                                                      | 593  |
| BU508007.1 | 611  | .....                                                                                                                                                  | 760  |
| AL544231.3 | 631  | .....                                                                                                                                                  | 780  |
| AL576223.3 | 737  | .....                                                                                                                                                  | 588  |
| AL570884.3 | 744  | .....                                                                                                                                                  | 595  |



DB013065.1 DB013065 TESOP2 Homo sapiens cDNA clone TESOP200154... 1040 0.0 100%  
DB328492.1 DB328492 PLACE6 Homo sapiens cDNA clone PLACE600972... 948 0.0 100%  
BG231632.1 naf37c05.xl Soares NPRMC Homo sapiens cDNA clone IM... 942 0.0 100%  
BU674442.1 UI-CF-DU0-aab-j-09-0-UI.s1 UI-CF-DU0 Homo sapiens c... 935 0.0 100%

ALIGNMENTS

```
Query      1      AGTGTGAAATCTTCAGAGAAGAATTTCTCTTTAGTCTTTTGCAAGAAGGTAGAGATAAAGACACTTTTTCAAAATGGCAATGGTATCAGAAATTCCTCAAGCAGGCCTGGTTTATTGAAAAATGAAGCAGGAATATGTTCAAACCTGTGA 150
BX417009.2 1      .....
AU134300.1 1      .....
AU138502.1 1      .....C.....
BF107418.1 1      .....
                                           133

Query      151     AGTCATCCAAAGGTGGTCCCGATCAGCGGTGAGCCCTATCCTACCTTCAATCCATCCTCGGATGTGCTGCTTGCATAAGGCCATAATGGTTAAAGGTGTGGATGAAGCAACCATCATTTGACATTTCACTAAGCGAAACAATGCAC 300
BX417009.2 139     .....
AU134300.1 151     .....
AU138502.1 151     .....
BF107418.1 134     .....
                                           283

Query      301     AGCGTCAACAGATCAAAGCAGCATATCTCCAGGAACAGGAAAGGTAAGTAGAGTGGTAAATTTAGATATTTAATTTTACAGCATAGTTATACTTAACCATGGATTCGGAAGCACAGTTACCTAGTTCTTTAAGGTTCTAACCACTGTTTT 450
BX417009.2 289     .....
AU134300.1 301     .....
AU138502.1 301     .....
BF107418.1 284     .....
                                           433

Query      451     CTCATTACATCTATGATTGGGATTGCAGTGTTTATCCACTTTGTGCAATTTAATCAAATTTTATCAAATTTCTATTTTTATACATTAGTCATCTTGGTGTATATTGTTTGCAGATGTGGTGCTCTGGGGACAAATTTTAAATTTGAACG 600
BX417009.2 439     .....
AU134300.1 451     .....N.....
AU138502.1 451     .....
BF107418.1 434     .....G.....
DB013065.1 1      .....
                                           62

Query      601     TAAACATCAGAGATTGCTGCTGTCAATAAAGAATATGGTCTGATTGAAATGTACTAATATTTAAACTGAACTGTTTAAATGCCTAAATTTATATATAATTTCTACTTTAAAAATAGCCTTATGTCTTTTATACCAATATGAGTAGTTTTC 750
BX417009.2 589     .....
AU134300.1 601     .....-.....
AU138502.1 601     .....A.....G.....N.....G.....N.....
                                           760
           \
           |
           G

           \
           |
           G

           \
           |
           C

           \
           |
           A

           \
           |
           A

           \
           |
           C

           \
           |
           A

           \
           |
           NG

           |
           T

BF107418.1 580     .T..AT.....TG..G....C.... 610
DB013065.1 63      .....
           \
           |
           T

Query      751     TAAAGCAATGAAATAGAAAACTATATAATTTTCAATATCTGATTATATCTGCTTGTATTTGAGAAGTACAAACCTCAAAGATTGGAACATGAATATATTATTTTAAAGTAATTTTACTTCTGTTTTCTGTTAGCACACAGTCCTCTGT 900
BX417009.2 739     .....
AU134300.1 750     .....N.....-.....
AU138502.1 761     C.....
           \
           |
           G

DB013065.1 214     .....
                                           363

Query      901     GTTTTGATCTTTTGATTCTCCCTCTGTATAAGATTACTAACCCCTATGCTTTAAGAAGTTATTGATGAATTCAGTAAATTTTATTTTAATCCCTCTAGATCTGGAAGGTAAGATAATGTTTCAAAATATTTGGTACACTTTGTATGT 1050
BX417009.2 889     .....-.....-.....-.....-.....W.....-.....
DB013065.1 364     .....
                                           513

Query      1051     GAAGGGAAGAAGCTCTAAAAGATGGTTGGGTTTAGGGATGAGTTGTACGATGACCTAAAGTCAGGTAATATCACATTTTTTAACTAGCATGTTACTTATTTGGAAGTCTGATTCTAATCtttttttttGAGCCCTGGATGAAACACT 1200
DB013065.1 514     .....
                                           567

Query      1201     GAAGAAAGCCCTTACAGGTCACCTTGAGGAGGTTGTTTGTGCTCTGCTAAAACTCCAGCGCAATTTGATGCTGATGAACCTCTGCTGCCCATGAAGGCCTTGGAACCTGATGAAGATACCTCTAATTGAGATTTTGGCATCAAGAATAA 1350
CA421424.1 727     .....-.....-.....
AI764962.1 731     ...-.....C.....A.....-.....C.....-.....CT.....C.....G.C.....-.....T. 586
           \
           |
           G

Query      1351     CAAAGAAATCAGAGACATTAAACAGGCTTACAGAGAGGAACCTGAAGAGAGATCTGGCAGAGACATAACCTCAGACACATCTGGAGATTTTCGGAACGCTTTGCTTTCTCTTGCTAAGGGTGACCGATCTGAGGACTTTGGTGTGAATGA 1500
CA421424.1 604     .....
AI764962.1 585     .C.G...T.....C.....C.....C.....C.....C.....-.....C.....T..... 437
DB328492.1 528     .....
BG231632.1 525     .....
BU674442.1 536     .....
                                           455

Query      1501     AGACTTGGCTGATTACAGATCCAGGCGCTTGTATGAAGCAGGAGAAAGGAGAAAGGGGACAGACGTAACGTTGTCAATACCATCCTTACCACCAGAAGCTATCCACAACCTTCGAGAGGTAACAATAAATTTCTTTTTCTGGAATCTGT 1650
CA421424.1 454     .....
AI764962.1 436     .....
DB328492.1 442     .....
BG231632.1 442     .....
                                           293
```



|            |      |                                                                                                                                                        |      |
|------------|------|--------------------------------------------------------------------------------------------------------------------------------------------------------|------|
| BU674442.1 | 454  | .....C.....                                                                                                                                            | 305  |
| Query      | 1651 | TTATGGAAGATGCAATTTTCTTTTTTGTATGACAAATAAGAGAAAGTAAAAACAGAACCTTTTTCAATTACTACTCTGTATCAAAACAGATACAGTGTTCCTGACCCATTGTTATTGTCAATTTTGCCAATTTTGTACAGCCGCTACTTT | 1800 |
| CA421424.1 | 304  | .....                                                                                                                                                  | 155  |
| AI764962.1 | 286  | .....                                                                                                                                                  | 137  |
| DB328492.1 | 292  | .....                                                                                                                                                  | 143  |
| BG231632.1 | 292  | .....                                                                                                                                                  | 143  |
| BU674442.1 | 304  | .....                                                                                                                                                  | 155  |

|            |      |                                                                                                                               |      |
|------------|------|-------------------------------------------------------------------------------------------------------------------------------|------|
| Query      | 1801 | ATCATATTTAATACATTTTGTGACTTGGGCATGTGGAACATAATTTGTTATTTTCACTGCCTTTTACTCCCTAAAGATTGGGAATATGTGTGGGAAAAGACATGCATAACAGAACAAATGAAATT | 1927 |
| CA421424.1 | 154  | .....                                                                                                                         | 28   |
| AI764962.1 | 136  | .....                                                                                                                         | 10   |
| DB328492.1 | 142  | .....                                                                                                                         | 16   |
| BG231632.1 | 142  | .....                                                                                                                         | 16   |
| BU674442.1 | 154  | .....                                                                                                                         | 28   |

Query= T12-2 [organism=Homo sapiens] anxl

Length=1027

| Sequences producing significant alignments:                       |                 |            |              |
|-------------------------------------------------------------------|-----------------|------------|--------------|
|                                                                   | Score<br>(Bits) | E<br>Value | Max<br>ident |
| CB306442.1 UI-CF-EN1-aej-e-15-0-UI.s1 UI-CF-EN1 Homo sapiens c... | 1279            | 0.0        | 100%         |
| CA447733.1 UI-H-E10-ayf-a-16-0-UI.s1 NCI_CGAP_E10 Homo sapiens... | 1279            | 0.0        | 100%         |
| CA447223.1 UI-H-E10-ayd-b-19-0-UI.s1 NCI_CGAP_E10 Homo sapiens... | 1279            | 0.0        | 100%         |
| CA422748.1 UI-H-FL0-bdr-g-09-0-UI.s1 NCI_CGAP_FL0 Homo sapiens... | 1279            | 0.0        | 100%         |
| CA419844.1 UI-H-FH0-bcm-d-16-0-UI.s1 NCI_CGAP_FH0 Homo sapiens... | 1279            | 0.0        | 100%         |
| CA417462.1 UI-H-FE0-bbw-c-13-0-UI.s1 NCI_CGAP_FE0 Homo sapiens... | 1279            | 0.0        | 100%         |
| CA415613.1 UI-H-EZ0-bay-p-10-0-UI.s1 NCI_CGAP_Ch1 Homo sapiens... | 1279            | 0.0        | 100%         |
| CA414702.1 UI-H-EZ0-bar-e-18-0-UI.s1 NCI_CGAP_Ch1 Homo sapiens... | 1279            | 0.0        | 100%         |
| BU633206.1 UI-H-FL1-bgt-f-12-0-UI.s1 NCI_CGAP_FL1 Homo sapiens... | 1279            | 0.0        | 100%         |
| BQ776306.1 UI-H-FH0-bcn-i-12-0-UI.s1 NCI_CGAP_FH0 Homo sapiens... | 1279            | 0.0        | 100%         |

#### ALIGNMENTS

|            |     |                                                                                                                                                         |     |
|------------|-----|---------------------------------------------------------------------------------------------------------------------------------------------------------|-----|
| Query      | 330 | CAGGAACAGGAGAAAGGGGACAGACGTAAACGTGTTCAATACCATCCTTACCACCAGAAGCTATCCACAACCTTCGACAGAGTGTTTCAGAAATACACCAAGTACAGTAAGCATGACATGAACAAAGTTCTGGACCTGGAGTTGAAAGGTG | 479 |
| CB306442.1 | 716 | .....G.A.....                                                                                                                                           | 567 |
| CA447733.1 | 716 | .....G.A.....                                                                                                                                           | 567 |
| CA447223.1 | 716 | .....G.A.....                                                                                                                                           | 567 |
| CA422748.1 | 718 | .....G.A.....                                                                                                                                           | 569 |
| CA419844.1 | 716 | .....G.A.....                                                                                                                                           | 567 |
| CA417462.1 | 713 | .....G.A.....                                                                                                                                           | 564 |
| CA415613.1 | 718 | .....G.A.....                                                                                                                                           | 569 |
| CA414702.1 | 718 | .....G.A.....                                                                                                                                           | 569 |
| BU633206.1 | 716 | .....G.A.....                                                                                                                                           | 567 |
| BQ776306.1 | 716 | .....G.A.....                                                                                                                                           | 567 |

|            |     |                                                                                                                                                       |     |
|------------|-----|-------------------------------------------------------------------------------------------------------------------------------------------------------|-----|
| Query      | 480 | ACATTGAGAAATGCCTCACAGCTATCGTGAAGTGCGCCACAAGCAACACAGCTTTCTTTGCAGAGAAGCTTCATCAAGCCATGAAAGGTGTGGAACTCGCCATAAGGCATTGATCAGGATTATGGTTTCCCGTTCTGAAATTGACATGA | 629 |
| CB306442.1 | 566 | .....                                                                                                                                                 | 417 |
| CA447733.1 | 566 | .....                                                                                                                                                 | 417 |
| CA447223.1 | 566 | .....                                                                                                                                                 | 417 |
| CA422748.1 | 568 | .....                                                                                                                                                 | 419 |
| CA419844.1 | 566 | .....                                                                                                                                                 | 417 |
| CA417462.1 | 563 | .....                                                                                                                                                 | 414 |
| CA415613.1 | 568 | .....                                                                                                                                                 | 419 |
| CA414702.1 | 568 | .....                                                                                                                                                 | 419 |
| BU633206.1 | 566 | .....                                                                                                                                                 | 417 |
| BQ776306.1 | 566 | .....                                                                                                                                                 | 417 |

|            |     |                                                                                                                                                    |     |
|------------|-----|----------------------------------------------------------------------------------------------------------------------------------------------------|-----|
| Query      | 630 | ATGATATCAAGCATTCTATCAGAAGATGTATGGTATCTCCCTTTGCCAAGCCATCCTGGATGAACCAAGGAGATTATGAGAAATCCTGGTGGCTCTTTGTGGAGGAAACTAAACATTCCCTTGATGGTCTCAAGCTATGATCAGAA | 779 |
| CB306442.1 | 416 | .....                                                                                                                                              | 267 |
| CA447733.1 | 416 | .....                                                                                                                                              | 267 |
| CA447223.1 | 416 | .....                                                                                                                                              | 267 |
| CA422748.1 | 418 | .....                                                                                                                                              | 269 |
| CA419844.1 | 416 | .....                                                                                                                                              | 267 |
| CA417462.1 | 413 | .....                                                                                                                                              | 264 |
| CA415613.1 | 418 | .....                                                                                                                                              | 269 |
| CA414702.1 | 418 | .....                                                                                                                                              | 269 |
| BU633206.1 | 416 | .....                                                                                                                                              | 267 |
| BQ776306.1 | 416 | .....                                                                                                                                              | 267 |

|            |     |                                                                                                                                                      |     |
|------------|-----|------------------------------------------------------------------------------------------------------------------------------------------------------|-----|
| Query      | 780 | GACTTTAATTATATATTTTCATCCTATAAGCTTAAATAGGAAAGTTTCTTCAACAGGATTACAGTGTAGCTACCTACATGCTGAAAAATATAGCCTTTAAATCATTTTTATATTATAACTCTGTATAATAGAGATAAGTCCATTTTAA | 929 |
| CB306442.1 | 266 | .....                                                                                                                                                | 117 |
| CA447733.1 | 266 | .....                                                                                                                                                | 117 |
| CA447223.1 | 266 | .....                                                                                                                                                | 117 |
| CA422748.1 | 268 | .....                                                                                                                                                | 119 |
| CA419844.1 | 266 | .....                                                                                                                                                | 117 |
| CA417462.1 | 263 | .....                                                                                                                                                | 114 |
| CA415613.1 | 268 | .....                                                                                                                                                | 119 |
| CA414702.1 | 268 | .....                                                                                                                                                | 119 |

|            |     |                                                                                                    |      |
|------------|-----|----------------------------------------------------------------------------------------------------|------|
| BU633206.1 | 266 | .....                                                                                              | 117  |
| BQ776306.1 | 266 | .....                                                                                              | 117  |
| Query      | 930 | AAATGTTTTCCTCCCAACCATAAAACCTATACAAGTTGTTCTAGTAACAATACATGAGAAAGATGTCTATGTAGCTGAAAAATAAATGACGTCACAAG | 1027 |
| CB306442.1 | 116 | .....                                                                                              | 19   |
| CA447733.1 | 116 | .....                                                                                              | 19   |
| CA447223.1 | 116 | .....                                                                                              | 19   |
| CA422748.1 | 118 | .....                                                                                              | 21   |
| CA419844.1 | 116 | .....                                                                                              | 19   |
| CA417462.1 | 113 | .....                                                                                              | 16   |
| CA415613.1 | 118 | .....                                                                                              | 21   |
| CA414702.1 | 118 | .....                                                                                              | 21   |
| BU633206.1 | 116 | .....                                                                                              | 19   |
| BQ776306.1 | 116 | .....                                                                                              | 19   |

Query= T13-10 [organism=Homo sapiens] anxa1

Length=1277

| Sequences producing significant alignments: |                                                        |      | Score<br>(Bits) | E<br>Value | Max<br>ident |
|---------------------------------------------|--------------------------------------------------------|------|-----------------|------------|--------------|
| BQ228162.1                                  | AGENCOURT_7258587 NIH_MGC_71 Homo sapiens cDNA clon... | 1679 | 0.0             | 99%        |              |
| AL574991.3                                  | AL574991 Homo sapiens PLACENTA COT 25-NORMALIZED Ho... | 1648 | 0.0             | 100%       |              |
| BM555842.1                                  | AGENCOURT_6544353 NIH_MGC_88 Homo sapiens cDNA clon... | 1639 | 0.0             | 99%        |              |
| AL576603.2                                  | AL576603 Homo sapiens PLACENTA COT 25-NORMALIZED Ho... | 1635 | 0.0             | 99%        |              |
| AL576223.3                                  | AL576223 Homo sapiens PLACENTA COT 25-NORMALIZED Ho... | 1633 | 0.0             | 99%        |              |
| AL570428.3                                  | AL570428 Homo sapiens PLACENTA COT 25-NORMALIZED Ho... | 1631 | 0.0             | 99%        |              |
| AL570884.3                                  | AL570884 Homo sapiens PLACENTA COT 25-NORMALIZED Ho... | 1628 | 0.0             | 99%        |              |
| AL576340.3                                  | AL576340 Homo sapiens PLACENTA COT 25-NORMALIZED Ho... | 1624 | 0.0             | 99%        |              |
| AL575425.3                                  | AL575425 Homo sapiens PLACENTA COT 25-NORMALIZED Ho... | 1615 | 0.0             | 99%        |              |
| AL553095.3                                  | AL553095 Homo sapiens PLACENTA COT 25-NORMALIZED Ho... | 1587 | 0.0             | 98%        |              |

#### ALIGNMENTS

|            |     |                                                                                                                                                        |     |
|------------|-----|--------------------------------------------------------------------------------------------------------------------------------------------------------|-----|
| Query      | 351 | GATGAAGATACTCTAATTGAGATTTTGGCATCAAGAACTAACAAAGAAATCAGAGACATTAACAGGGTCTACAGAGAGGAAGAGAGATCTGGCCAAAGACATAACCTCAGACACATCTGGAGATTTTCGGAAACGCTTTGCTTTCT     | 500 |
| BQ228162.1 | 40  | .....                                                                                                                                                  | 189 |
| AL574991.3 | 896 | .....                                                                                                                                                  | 747 |
| BM555842.1 | 1   | .....                                                                                                                                                  | 148 |
| AL576603.2 | 901 | .....-NM.....-                                                                                                                                         | 754 |
| AL576223.3 | 896 | .....W.AAR.....                                                                                                                                        | 747 |
| AL570428.3 | 901 | .....W.....                                                                                                                                            | 752 |
| AL570884.3 | 903 | .....                                                                                                                                                  | 754 |
| AL576340.3 | 896 | .....                                                                                                                                                  | 758 |
| AL575425.3 | 914 | .....R.....R.....                                                                                                                                      | 765 |
| AL553095.3 | 902 | .....                                                                                                                                                  | 753 |
| Query      | 501 | CTTGCTAAGGGTGACCGATCTGAGGACTTTGGTGTGAATGAAGACTTGCGTGATTTCAGATGCCAGGGCCTTGTATGAAGCAGGAGAAAGGAGAAAGGGGACAGACGTAACGCTGTTCAATACCATCCTTACCACCAGAAGCTATCCAAA | 650 |
| BQ228162.1 | 190 | .....                                                                                                                                                  | 339 |
| AL574991.3 | 746 | .....                                                                                                                                                  | 597 |
| BM555842.1 | 149 | .....                                                                                                                                                  | 298 |
| AL576603.2 | 753 | .....                                                                                                                                                  | 604 |
| AL576223.3 | 746 | .....                                                                                                                                                  | 597 |
| AL570428.3 | 751 | .....R.....N.....                                                                                                                                      | 602 |
| AL570884.3 | 753 | .....                                                                                                                                                  | 604 |
| AL576340.3 | 757 | .....                                                                                                                                                  | 608 |
| AL575425.3 | 764 | .....R.....B.....S.....T.....                                                                                                                          | 615 |
| AL553095.3 | 752 | .....                                                                                                                                                  | 603 |
| Query      | 651 | CTTCGCAGAGTGTTCAGAAATACCAAGTACAGTAAGCATGACATGAACAAAGTTCTGGACCTGGAGTTGAAAGGTGACATTGAGAAATGCCTCAGAGTATCGTGAAGTGCGCCACAAGCAACACAGCTTTCTTTGCAGAGAAGCTT     | 800 |
| BQ228162.1 | 340 | .....                                                                                                                                                  | 489 |
| AL574991.3 | 596 | .....                                                                                                                                                  | 447 |
| BM555842.1 | 299 | .....                                                                                                                                                  | 448 |
| AL576603.2 | 603 | .....                                                                                                                                                  | 454 |
| AL576223.3 | 596 | .....                                                                                                                                                  | 447 |
| AL570428.3 | 601 | .....A.....                                                                                                                                            | 452 |
| AL570884.3 | 603 | .....                                                                                                                                                  | 454 |
| AL576340.3 | 607 | .....                                                                                                                                                  | 458 |
| AL575425.3 | 614 | .....N.....N.....                                                                                                                                      | 465 |
| AL553095.3 | 602 | .....YY...V.....C                                                                                                                                      | 453 |
| Query      | 801 | CATCAAGCCATGAAAGGTGTTGGAATCGCCATAAGGCATTGATCAGGATTATGGTTTCCCGTTCTGAAATTGACATGAATGATATCAAGCATTTCTATCAGAAGATGTATGGTATCTCCCTTTGCCAAGCCATCCTGGATGAAACCAA   | 950 |
| BQ228162.1 | 490 | .....                                                                                                                                                  | 639 |
| AL574991.3 | 446 | .....W.....                                                                                                                                            | 297 |
| BM555842.1 | 449 | .....                                                                                                                                                  | 598 |
| AL576603.2 | 453 | .....                                                                                                                                                  | 304 |
| AL576223.3 | 446 | .....                                                                                                                                                  | 297 |
| AL570428.3 | 451 | .....A.....T.....                                                                                                                                      | 302 |
| AL570884.3 | 453 | .....                                                                                                                                                  | 304 |
| AL576340.3 | 457 | .....R.....                                                                                                                                            | 308 |
| AL575425.3 | 464 | .....                                                                                                                                                  | 315 |

```

AL553095.3 452 .....S..S.....RK..R..G..R.....K..G.....303
Query      951 GGAGATTATGAGAAAATCCTGGTGGCTCTTTGTGGAGGAACTAAACATTCCCTTGATGGTCTCAAGCTATGATCAGAAGACTTTAATTATATATTTTCATCCTATAAGCTTAAATAGGAAAGTTTCTTCAACAGGATTACAGTGTAGCT 1100
BQ228162.1 640 .....                               790
                                     |
                                     A
AL574991.3 296 .....Y.....147
BM555842.1 599 .....748
AL576603.2 303 .....154
AL576223.3 296 .....147
AL570428.3 301 .....152
AL570884.3 303 .....154
AL576340.3 307 ..R.....158
AL575425.3 314 ..R.....165
AL553095.3 302 ..R.....153
Query      1101 ACCTACATGCTGAAAAATATAGCCTTAAATCATTTTATATATAACTCTGTATAATAGAGATAAGTCCATTTTTTAAAAATGTTTTCCCCAAACCATAAAACCTATACAAGTTGTTCTAGTAAACAATACATGAGAAAGATGTCCTATG 1250
BQ228162.1 791 .....                               942
                                     |
                                     G
AL574991.3 146 .....1
BM555842.1 749 .....907
                                     |
                                     A
                                     |
                                     C
AL576603.2 153 .....3
                                     |
                                     C
                                     |
                                     N
AL576223.3 146 .....B.....1
AL570428.3 151 .....T.....2
AL570884.3 153 .....RW..V.....2
                                     |
                                     N
                                     |
                                     N
AL576340.3 157 .....7
                                     |
                                     N
AL575425.3 164 ..N.....17
AL553095.3 152 .....G.....2
                                     |
                                     N
Query      1251 TAGCTGAAAAATAAAATGACGTC 1272
BQ228162.1 943 .....965
                                     |
                                     A
BM555842.1 908 .....922
AL576603.2 2 ..1
AL570428.3 1 ..1
AL570884.3 1 ..1
AL576340.3 6 ..5
AL553095.3 1 ..1

Query= T14-11 [organism=Homo sapiens] anxal
Length=1348

Sequences producing significant alignments:

Score      E      Max
(Bits)     Value  ident

AL570428.3 AL570428 Homo sapiens PLACENTA COT 25-NORMALIZED Ho... 1908      0.0   98%
AL576223.3 AL576223 Homo sapiens PLACENTA COT 25-NORMALIZED Ho... 1831      0.0   98%
AL570884.3 AL570884 Homo sapiens PLACENTA COT 25-NORMALIZED Ho... 1825      0.0   97%
AL574991.3 AL574991 Homo sapiens PLACENTA COT 25-NORMALIZED Ho... 1810      0.0   98%
AL575425.3 AL575425 Homo sapiens PLACENTA COT 25-NORMALIZED Ho... 1788      0.0   98%
AL553095.3 AL553095 Homo sapiens PLACENTA COT 25-NORMALIZED Ho... 1762      0.0   97%
FS581262.1 FS581262 macaque heart cDNA library QhtB Macaca fas... 1742      0.0   96%
BQ228162.1 AGENCOURT 7258587 NIH_MGC_71 Homo sapiens cDNA clon... 1731      0.0   99%
AL576340.3 AL576340 Homo sapiens PLACENTA COT 25-NORMALIZED Ho... 1729      0.0   97%
AL576603.2 AL576603 Homo sapiens PLACENTA COT 25-NORMALIZED Ho... 1655      0.0   99%

ALIGNMENTS

Query      1      AGTGTGAAATCTTCAGAGAAGAATTCTCTTTAGTTCTTTTGCAAGAAGGTAGAGATATAAGACACTTTTTCAAAAATGGCAATGGTATCAGAATTCCCTCAAGCAGGCCTGGTTTATTGAAAATGAAGACAGGAATATGTTCAAACCTGTG 150
FS581262.1 1      .....C.C.....144

```

|            |      |                                                                                                                                                         |      |
|------------|------|---------------------------------------------------------------------------------------------------------------------------------------------------------|------|
| Query      | 151  | AAGTCATCCAAAGGTGGTCCCGGATCAGCGGTGAGCCCTATCTCACTTCAAATCCATCATTTGAACATTGATCTCTAACTAACTAAGCGAAACAATGCACAGCGTCAACAGATCAAAGCAGCATATCTCCAGGAAACAGGAAGCCCT     | 300  |
| AL570428.3 | 1087 | .....T.....T.....A.....W.....GC.....                                                                                                                    | 1022 |
| AL576223.3 | 1050 | .....W.....R.....Y.....                                                                                                                                 | 1012 |
| AL570884.3 | 1059 | .....T.....T.....C.....Y.....                                                                                                                           | 1025 |
|            |      | \                                                                                                                                                       |      |
|            |      |                                                                                                                                                         |      |
|            |      | M                                                                                                                                                       |      |
| AL574991.3 | 1017 | .....                                                                                                                                                   | 1011 |
| AL575425.3 | 1037 | .....                                                                                                                                                   | 1034 |
| AL553095.3 | 1020 | .....                                                                                                                                                   | 1017 |
| FS581262.1 | 149  | ..A.....T.....A.....-.....CAACC.T.....-A.-T.....                                                                                                        | 295  |
| AL576340.3 | 1011 | .....                                                                                                                                                   | 1008 |
| Query      | 301  | GGATGAAACACTGAAGAAAGCCCTTACAGGTCACCTTGAGGAGTTGTTTGTAGCTCTGCTAAAACTCCAGCGCAATTTGATGCTGTGAACCTTCGTCTGCCATGAAGGCGCTTGGAACCTGATGAAGATACTCTAATTGAGATTTTGGC   | 450  |
| AL570428.3 | 1021 | .....Y.....D.....WR.....A.....V.....M.....                                                                                                              | 873  |
| AL576223.3 | 1011 | ..R.....D.....A.....V.....W...AAR.....                                                                                                                  | 868  |
| AL570884.3 | 1024 | ..W.....RS...W...Y.M...R...T...K...YY...S.W...C.....K...S.....                                                                                          | 875  |
| AL574991.3 | 1010 | ..R.....K.....RS...CR...K.....                                                                                                                          | 868  |
| AL575425.3 | 1033 | .....M.....M.....KG...C.....C.C...S...A.....                                                                                                            | 886  |
| AL553095.3 | 1016 | ..R.....YK.....-.....-.....C.....G.....                                                                                                                 | 874  |
| FS581262.1 | 296  | .....C.TG.....G.....C.....G.....                                                                                                                        | 445  |
| BQ228162.1 | 12   | .....G.....Y.....-.....K.....-.....RW.....                                                                                                              | 68   |
| AL576340.3 | 1007 | .....G.....Y.....-.....K.....-.....RW.....                                                                                                              | 878  |
| AL576603.2 | 917  | .....-.....WM.....                                                                                                                                      | 875  |
| Query      | 451  | ATCAAGAACTAACAAGAAATCAGAGACATTAAACAGGGTCTACAGAGAGGAACTGAAGAGAGATCTGGCCAAAGACATAACCTCAGACACATCTGGAGATTTTCGGAACGCTTTGCTTTCTCTTGTCTAAGGGTGACCGATCTGAGGACTT | 600  |
| AL570428.3 | 872  | .....W.....                                                                                                                                             | 723  |
| AL576223.3 | 867  | .....                                                                                                                                                   | 718  |
| AL570884.3 | 874  | .....                                                                                                                                                   | 725  |
| AL574991.3 | 867  | .....                                                                                                                                                   | 718  |
| AL575425.3 | 885  | .....R.....R.....                                                                                                                                       | 736  |
| AL553095.3 | 873  | .....                                                                                                                                                   | 724  |
| FS581262.1 | 446  | .....                                                                                                                                                   | 595  |
| BQ228162.1 | 69   | .....                                                                                                                                                   | 218  |
| AL576340.3 | 877  | .....                                                                                                                                                   | 729  |
| AL576603.2 | 874  | .....                                                                                                                                                   | 725  |
| Query      | 601  | TGGTGTGAATGAAGACTTGGCTGATTGATGCCAGGGCCTTGTATGAAGCAGGAGAAAGGAGAAAGGGGACAGACGTAAACGTGTTCAATACCATCCTTACCACAGAAGCTATCCACAACCTTCGAGAGTGTTCAGAAATACACAA       | 750  |
| AL570428.3 | 722  | .....R.....N.....                                                                                                                                       | 573  |
| AL576223.3 | 717  | .....                                                                                                                                                   | 568  |
| AL570884.3 | 724  | .....                                                                                                                                                   | 575  |
| AL574991.3 | 717  | .....                                                                                                                                                   | 568  |
| AL575425.3 | 735  | .....B.....S.....T.....                                                                                                                                 | 586  |
| AL553095.3 | 723  | .....                                                                                                                                                   | 574  |
| FS581262.1 | 596  | .....G.....T.....C.....T.....                                                                                                                           | 745  |
| BQ228162.1 | 219  | .....                                                                                                                                                   | 368  |
| AL576340.3 | 728  | .....                                                                                                                                                   | 579  |
| AL576603.2 | 724  | .....                                                                                                                                                   | 575  |
| Query      | 751  | GTACAGTAAGCATGACATGAACAAAGTTCTGGACCTGGAGTTGAAAGGTGACATTGAGAAATGCCCTACAGCTATCGTGAAGTGCGCCACAAGCAAACGAGCTTTCTTTGAGAGAGCTTCATCAAGCCATGAAAGGTGTTGGAACTCG    | 900  |
| AL570428.3 | 572  | .....A.....                                                                                                                                             | 423  |
| AL576223.3 | 567  | .....                                                                                                                                                   | 418  |
| AL570884.3 | 574  | .....                                                                                                                                                   | 425  |
| AL574991.3 | 567  | .....                                                                                                                                                   | 418  |
| AL575425.3 | 585  | .....N.....N.....                                                                                                                                       | 436  |
| AL553095.3 | 573  | .....YY...V.....A...C.....V.....                                                                                                                        | 424  |
| FS581262.1 | 746  | .....T.....                                                                                                                                             | 895  |
| BQ228162.1 | 369  | .....                                                                                                                                                   | 518  |
| AL576340.3 | 578  | .....                                                                                                                                                   | 429  |
| AL576603.2 | 574  | .....                                                                                                                                                   | 425  |
| Query      | 901  | CCATAAGGCATTGATCAGGATTATGGTTTCCCGTTCTGAAATTGACATGAATGATATCAAAGATTCATCAGAAGATGTATGGTATCTCCCTTTGCCAAGCCATCCTGGATGAACCAAAGGAGATTATGAGAAATCCTGGTGGCTCT      | 1050 |
| AL570428.3 | 422  | .....A.....T.....                                                                                                                                       | 273  |
| AL576223.3 | 417  | .....                                                                                                                                                   | 268  |
| AL570884.3 | 424  | .....                                                                                                                                                   | 275  |
| AL574991.3 | 417  | .....W.....                                                                                                                                             | 268  |
| AL575425.3 | 435  | .....                                                                                                                                                   | 286  |
| AL553095.3 | 423  | .....S...S.....RK...R...G...R.....K...G...R.....                                                                                                        | 274  |
| FS581262.1 | 896  | .....A.....-.....-.....-.....-.....                                                                                                                     | 1038 |
| BQ228162.1 | 519  | .....                                                                                                                                                   | 668  |
| AL576340.3 | 428  | .....R.....R.....                                                                                                                                       | 279  |
| AL576603.2 | 424  | .....                                                                                                                                                   | 275  |
| Query      | 1051 | TTGTGGAGGAACTAAACATTCCCTTGATGGTCTCAAGCTATGATCAGAAGACTTTAATTATATATTTTATCTCTATAAGCTTAAATAGGAAAGTTTCTTCAACAGGATTACAGTGTAGCTACCTACATGCTGAAAAATATAGCCTTTAA   | 1200 |
| AL570428.3 | 272  | .....                                                                                                                                                   | 123  |
| AL576223.3 | 267  | .....                                                                                                                                                   | 118  |
| AL570884.3 | 274  | .....Y.....                                                                                                                                             | 125  |
| AL574991.3 | 267  | .....                                                                                                                                                   | 118  |
| AL575425.3 | 285  | .....                                                                                                                                                   | 136  |
| AL553095.3 | 273  | .....N.....                                                                                                                                             | 124  |
| FS581262.1 | 1039 | .....                                                                                                                                                   | 1072 |



BQ228162.1 420 ..... 569  
 AL576603.2 523 ..... 374  
 AL576340.3 527 ..... 378  
 AL576223.3 516 ..... 367  
 AL574991.3 516 ..... 367  
 BM555842.1 379 ..... 528  
 AL570428.3 521 ..... A. 372  
 BE614257.1 536 ..... 387  
 AL570884.3 523 ..... 374  
 BU857810.1 267 ..... 416  
  
 Query 810 TGATATCAAAGCATTCATCAGAAGATGTATGGTATCTCCCTTTGCCAAGCCATCTGGATGAAACCAAGGAGATTATGAGAAAATCCTGGTGGCTCTTTGTGGAGGAACTAAACATTCCCTTGATGGTCTCAAGCTATGATCAGAAG 959  
 BQ228162.1 570 ..... 719  
 AL576603.2 373 ..... 224  
 AL576340.3 377 ..... R. R. 228  
 AL576223.3 366 ..... 217  
 AL574991.3 366 ..... W. Y. 217  
 BM555842.1 529 ..... 678  
 AL570428.3 371 ..... T. 222  
 BE614257.1 386 ..... 237  
 AL570884.3 373 ..... 224  
 BU857810.1 417 ..... 566  
  
 Query 960 ACTTTAATTATATATTTTCATCCTATAAGCTTAAATAGGAAAGTTTCTTCAACAGGATTACAGTGTAGCTACCTACATGCTGAAAAATATAGCCTTTAAATCATTTTATATTATAAATCTGTATAATAGAGATAAGTCCATTTTAAAA 1109  
 BQ228162.1 720 ..... 870  
  
 AL576603.2 223 ..... 74  
 AL576340.3 227 ..... 78  
 AL576223.3 216 ..... 67  
 AL574991.3 216 ..... 67  
 BM555842.1 679 ..... 828  
 AL570428.3 221 ..... T. 72  
 BE614257.1 236 ..... 87  
 AL570884.3 223 ..... 74  
 BU857810.1 567 ..... N. N. 716  
  
 Query 1110 AATGTTTTCCCAACCATAAAACCCATACAAGTTGTCTAGTAACAATACATGAGAAAGATGTCTATGTAGCTGAAAAATAAATGACGTC 1201  
 BQ228162.1 871 ..... G. 965  
  
 AL576603.2 73 ..... 1  
  
 AL576340.3 77 ..... 5  
  
 AL576223.3 66 ..... B. N. 1  
 AL574991.3 66 ..... 1  
 BM555842.1 829 ..... G. 922  
  
 AL570428.3 71 ..... 1  
 BE614257.1 86 ..... T. A- 6  
  
 AL570884.3 73 ..... RW...V...N...N...W...A... 1  
  
 BU857810.1 717 ..... N. N. 808  
  
 Query= T16-12 [organism=Homo sapiens] anxa1  
 Length=1094

| Sequences producing significant alignments: |                      |                                               | Score<br>(Bits) | E<br>Value | Max<br>Ident |
|---------------------------------------------|----------------------|-----------------------------------------------|-----------------|------------|--------------|
| AL553114.3                                  | AL553114             | Homo sapiens PLACENTA COT 25-NORMALIZED Ho... | 1441            | 0.0        | 100%         |
| CX870542.1                                  | HESC4_46_F03.g1_A037 | NIH MGC 262 Homo sapiens cDNA ...             | 1441            | 0.0        | 100%         |
| BQ953713.1                                  | AGENCOURT_8786826    | NIH MGC 43 Homo sapiens cDNA clon...          | 1432            | 0.0        | 100%         |
| BM458053.1                                  | AGENCOURT_6411336    | NIH MGC 71 Homo sapiens cDNA clon...          | 1430            | 0.0        | 100%         |
| AL544959.3                                  | AL544959             | Homo sapiens PLACENTA COT 25-NORMALIZED Ho... | 1426            | 0.0        | 100%         |
| AU117349.1                                  | AU117349             | HEMBA1 Homo sapiens cDNA clone HEMBA100120... | 1426            | 0.0        | 100%         |

|            |                    |                                               |      |     |      |
|------------|--------------------|-----------------------------------------------|------|-----|------|
| AL553679.3 | AL553679           | Homo sapiens PLACENTA COT 25-NORMALIZED Ho... | 1419 | 0.0 | 100% |
| BQ962441.1 | AGENCOURT_10056322 | NIH_MGC_71 Homo sapiens cDNA clo...           | 1419 | 0.0 | 100% |
| BU902298.1 | AGENCOURT_10127317 | NIH_MGC_71 Homo sapiens cDNA clo...           | 1417 | 0.0 | 100% |
| EB387180.1 | nbj26d10.y1        | Human optic nerve. Unnormalized (nbj) H...    | 1415 | 0.0 | 100% |

ALIGNMENTS

|            |     |                                                                                                                                                     |     |
|------------|-----|-----------------------------------------------------------------------------------------------------------------------------------------------------|-----|
| Query      | 1   | AGTGTGAAATCTTCAGAGAAGAATTCTCTTTAGTCTTTTGAAGAAGGTAGAGATAAAGACACTTTTTCAAAATGGCAATGGTATCAGAATTCCTCAAGCAGGCCTGGTTTATTGAAAATGAAGAGCAGGAATATGTTCAAACTGTGA | 150 |
| AL553114.3 | 107 | .....                                                                                                                                               | 256 |
| CX870542.1 | 29  | .....                                                                                                                                               | 178 |
| BQ953713.1 | 1   | .....                                                                                                                                               | 145 |
| BM458053.1 | 11  | .....                                                                                                                                               | 160 |
| AL544959.3 | 1   | .....                                                                                                                                               | 142 |
| AU117349.1 | 1   | .....                                                                                                                                               | 150 |
| AL553679.3 | 1   | .....                                                                                                                                               | 142 |
| BQ962441.1 | 1   | .....                                                                                                                                               | 138 |
| BU902298.1 | 24  | .....                                                                                                                                               | 164 |

\  
|  
N

|            |   |       |     |
|------------|---|-------|-----|
| EB387180.1 | 1 | ..... | 136 |
|------------|---|-------|-----|

|            |     |                                                                                                                                                      |     |
|------------|-----|------------------------------------------------------------------------------------------------------------------------------------------------------|-----|
| Query      | 151 | AGTCATCCAAAGGTGGTCCCGGATCAGCGGTGAGCCCTATCCTACCTTCAATCCATCCTCGGATGTCGCTGCCTTGCATAAGGCCATAATGGTTAAAGGTGTGGATGAAGCAACCATCTTGACATTCTAACTAAGCGAAACAATGCAC | 300 |
| AL553114.3 | 257 | .....                                                                                                                                                | 406 |
| CX870542.1 | 179 | .....                                                                                                                                                | 328 |
| BQ953713.1 | 146 | .....                                                                                                                                                | 295 |
| BM458053.1 | 161 | .....                                                                                                                                                | 310 |
| AL544959.3 | 143 | .....                                                                                                                                                | 292 |
| AU117349.1 | 151 | .....                                                                                                                                                | 300 |
| AL553679.3 | 143 | .....                                                                                                                                                | 292 |
| BQ962441.1 | 139 | .....                                                                                                                                                | 288 |
| BU902298.1 | 165 | .....                                                                                                                                                | 314 |
| EB387180.1 | 137 | .....                                                                                                                                                | 286 |

|            |     |                                                                                                                                                  |     |
|------------|-----|--------------------------------------------------------------------------------------------------------------------------------------------------|-----|
| Query      | 301 | AGCGTCAACAGATCAAAGCAGCATATCTCCAGGAAACAGGAAAGCCCTGGATGAAACACTGAAGAAAGCCCTTACAGGTACCTTGAGGAGGTGTGTTTAGCTCTGCTAAAACTCCAGCGCAATTTGATGCTGAACTTCGTGCTG | 450 |
| AL553114.3 | 407 | .....                                                                                                                                            | 556 |
| CX870542.1 | 329 | .....                                                                                                                                            | 478 |
| BQ953713.1 | 296 | .....                                                                                                                                            | 445 |
| BM458053.1 | 311 | .....                                                                                                                                            | 460 |
| AL544959.3 | 293 | .....                                                                                                                                            | 442 |
| AU117349.1 | 301 | .....                                                                                                                                            | 450 |
| AL553679.3 | 293 | .....C.....                                                                                                                                      | 441 |
| BQ962441.1 | 289 | .....                                                                                                                                            | 438 |
| BU902298.1 | 315 | .....                                                                                                                                            | 464 |
| EB387180.1 | 287 | .....                                                                                                                                            | 436 |

|            |     |                                                                                                                                                      |     |
|------------|-----|------------------------------------------------------------------------------------------------------------------------------------------------------|-----|
| Query      | 451 | CCATGAAGGCCTTGGAACTGATGAAGTACTCTAATTGAGATTTTGGCATCAAGAACTAACAAAGAAATCAGAGACATTAAACAGGCTCTACAGAGAGAACTGAAGAGAGATCTGGCCAAAGACATAACCTCAGACACATCTGGAGATT | 600 |
| AL553114.3 | 557 | .....                                                                                                                                                | 706 |
| CX870542.1 | 479 | .....                                                                                                                                                | 628 |
| BQ953713.1 | 446 | .....                                                                                                                                                | 595 |
| BM458053.1 | 461 | .....                                                                                                                                                | 610 |
| AL544959.3 | 443 | .....                                                                                                                                                | 592 |
| AU117349.1 | 451 | .....                                                                                                                                                | 600 |
| AL553679.3 | 442 | .....                                                                                                                                                | 591 |
| BQ962441.1 | 439 | .....                                                                                                                                                | 588 |
| BU902298.1 | 465 | .....                                                                                                                                                | 614 |
| EB387180.1 | 437 | .....                                                                                                                                                | 586 |

|            |     |                                                                                                                                                    |     |
|------------|-----|----------------------------------------------------------------------------------------------------------------------------------------------------|-----|
| Query      | 601 | TTCGGAACGCTTTGCTTTCTCTTGTCTAAGGGTGACCGATCTGAGGACTTTGGTGTGAATGAAGACTTGGCTGATTGATGCCAGGCTTGTATGAAGCAGGAGAAAGGAGAAAGGGGACAGACGTAAACGTTTCAATACCATCCTTA | 750 |
| AL553114.3 | 707 | .....                                                                                                                                              | 856 |
| CX870542.1 | 629 | .....                                                                                                                                              | 778 |
| BQ953713.1 | 596 | .....                                                                                                                                              | 745 |
| BM458053.1 | 611 | .....                                                                                                                                              | 760 |
| AL544959.3 | 593 | .....T.....                                                                                                                                        | 742 |
| AU117349.1 | 601 | .....                                                                                                                                              | 750 |
| AL553679.3 | 592 | .....N.....                                                                                                                                        | 741 |
| BQ962441.1 | 589 | .....                                                                                                                                              | 738 |
| BU902298.1 | 615 | .....                                                                                                                                              | 764 |
| EB387180.1 | 587 | .....                                                                                                                                              | 736 |

|            |     |                                 |     |
|------------|-----|---------------------------------|-----|
| Query      | 751 | CCACCAGAAGCTATCCACAACCTTCGCAGAG | 780 |
| AL553114.3 | 857 | .....                           | 886 |
| CX870542.1 | 779 | .....                           | 808 |
| BQ953713.1 | 746 | .....                           | 775 |
| BM458053.1 | 761 | .....                           | 791 |

\  
|  
C

|            |     |       |     |
|------------|-----|-------|-----|
| AL544959.3 | 743 | ..... | 772 |
| AU117349.1 | 751 | ..... | 777 |
| AL553679.3 | 742 | ..... | 771 |
| BQ962441.1 | 739 | ..... | 768 |

BU902298.1 765 ..... 794  
EB387180.1 737 ..... 766

Query= T17-2 [organism=Homo sapiens] anxl

Length=1103

| Sequences producing significant alignments: |                                                        |      | Score  | E     | Max   |
|---------------------------------------------|--------------------------------------------------------|------|--------|-------|-------|
|                                             |                                                        |      | (Bits) | Value | ident |
| BU857810.1                                  | AGENCOURT_10474308 NIH_MGC_107 Homo sapiens cDNA cl... | 1386 | 0.0    | 99%   |       |
| CN386790.1                                  | 17000599887650 GRN PRENEU Homo sapiens cDNA 5', mRN... | 1378 | 0.0    | 100%  |       |
| BQ228162.1                                  | AGENCOURT_7258587 NIH_MGC_71 Homo sapiens cDNA clon... | 1376 | 0.0    | 99%   |       |
| CA447733.1                                  | UI-H-EI0-ayf-a-16-0-UI.s1 NCI_CGAP_EI0 Homo sapiens... | 1371 | 0.0    | 100%  |       |
| CA423056.1                                  | UI-H-FL0-bdk-f-10-0-UI.s1 NCI_CGAP_FL0 Homo sapiens... | 1365 | 0.0    | 100%  |       |
| BE614257.1                                  | 601504294T1 NIH_MGC_71 Homo sapiens cDNA clone IMAG... | 1358 | 0.0    | 99%   |       |
| BQ776006.1                                  | UI-H-FH0-bck-h-18-0-UI.s1 NCI_CGAP_FH0 Homo sapiens... | 1356 | 0.0    | 100%  |       |
| AL576603.2                                  | AL576603 Homo sapiens PLACENTA COT 25-NORMALIZED Ho... | 1352 | 0.0    | 100%  |       |
| AL576340.3                                  | AL576340 Homo sapiens PLACENTA COT 25-NORMALIZED Ho... | 1351 | 0.0    | 100%  |       |
| AL576223.3                                  | AL576223 Homo sapiens PLACENTA COT 25-NORMALIZED Ho... | 1349 | 0.0    | 100%  |       |

ALIGNMENTS

|            |     |                                                                                                                                                         |      |
|------------|-----|---------------------------------------------------------------------------------------------------------------------------------------------------------|------|
| Query      | 346 | CCGATCTGAGGACTTTGGTGTGAATGAAGACTTGGCTGATTACAGATGCCAGGGCCTTGTATGAAGCAGGAGAAAGGAGAAAGGGGACAGCGTAAACGTGTTCAATACCATCCTTACCAACCAGAAGCTATCCACAACCTCGCAGAGTGTT | 495  |
| BU857810.1 | 51  | .....                                                                                                                                                   | 200  |
| CN386790.1 | 18  | .....                                                                                                                                                   | 167  |
| BQ228162.1 | 204 | .....                                                                                                                                                   | 353  |
| CA447733.1 | 765 | .....                                                                                                                                                   | 632  |
| CA423056.1 | 767 | .....                                                                                                                                                   | 634  |
| BE614257.1 | 752 | .....                                                                                                                                                   | 603  |
| BQ776006.1 | 765 | .....N                                                                                                                                                  | 632  |
|            |     | \                                                                                                                                                       |      |
|            |     | I                                                                                                                                                       |      |
|            |     | T                                                                                                                                                       |      |
| AL576603.2 | 739 | .....                                                                                                                                                   | 590  |
| AL576340.3 | 743 | .....                                                                                                                                                   | 594  |
| AL576223.3 | 732 | .....                                                                                                                                                   | 583  |
| Query      | 496 | TCGAAATACACCAAGTACAGTAAAGCATGACATGAACAAAGTTCTGGACCTGGAGTTGAAAGGTGACATTGAGAAATGCTTCACAGCTATCGTGAAGTGCGCCACAAGCAAAACAGCTTTCTTTGCAGAGAAGCTTCATCAAGCCATGAA  | 645  |
| BU857810.1 | 201 | .....                                                                                                                                                   | 350  |
| CN386790.1 | 168 | .....                                                                                                                                                   | 317  |
| BQ228162.1 | 354 | .....                                                                                                                                                   | 503  |
| CA447733.1 | 631 | .....                                                                                                                                                   | 482  |
| CA423056.1 | 633 | .....                                                                                                                                                   | 484  |
| BE614257.1 | 602 | .....                                                                                                                                                   | 453  |
| BQ776006.1 | 631 | .....                                                                                                                                                   | 482  |
| AL576603.2 | 589 | .....                                                                                                                                                   | 440  |
| AL576340.3 | 593 | .....                                                                                                                                                   | 444  |
| AL576223.3 | 582 | .....                                                                                                                                                   | 433  |
| Query      | 646 | AGGTGTTGGAACCTGCCATAAGGCATTGATCAGGATTATGGTTTCCCGTTCTGAAATTGACATGAATGATATCAAGCATTCTATCAGAAGATGTATGGTATCTCCCTTTGCCAAGCCATCCTGGATGAAACCAAGGAGATTATGAGAA    | 795  |
| BU857810.1 | 351 | .....                                                                                                                                                   | 500  |
| CN386790.1 | 318 | .....                                                                                                                                                   | 467  |
| BQ228162.1 | 504 | .....                                                                                                                                                   | 653  |
| CA447733.1 | 481 | .....                                                                                                                                                   | 332  |
| CA423056.1 | 483 | .....                                                                                                                                                   | 334  |
| BE614257.1 | 452 | .....                                                                                                                                                   | 303  |
| BQ776006.1 | 481 | .....                                                                                                                                                   | 332  |
| AL576603.2 | 439 | .....                                                                                                                                                   | 290  |
| AL576340.3 | 443 | .....R.....R.....                                                                                                                                       | 294  |
| AL576223.3 | 432 | .....                                                                                                                                                   | 283  |
| Query      | 796 | AATCCTGGTGGCTCTTTGTGGAGGAACTAAACATTCCCTGGATGGCTCAAGCTATGATCAGAAGACTTTAAATTATATATTTTCATCCTATAAGCTTAAATAGGAAAGTTTCTTCAACAGGATTACAGTGTAGCTTACCTACATGCTGAA  | 945  |
| BU857810.1 | 501 | .....N.....                                                                                                                                             | 650  |
| CN386790.1 | 468 | .....                                                                                                                                                   | 617  |
| BQ228162.1 | 654 | .....                                                                                                                                                   | 804  |
|            |     | \                                                                                                                                                       |      |
|            |     | I                                                                                                                                                       |      |
|            |     | A                                                                                                                                                       |      |
| CA447733.1 | 331 | .....                                                                                                                                                   | 182  |
| CA423056.1 | 333 | .....                                                                                                                                                   | 184  |
| BE614257.1 | 302 | .....                                                                                                                                                   | 153  |
| BQ776006.1 | 331 | .....                                                                                                                                                   | 182  |
| AL576603.2 | 289 | .....                                                                                                                                                   | 140  |
| AL576340.3 | 293 | .....                                                                                                                                                   | 144  |
| AL576223.3 | 282 | .....                                                                                                                                                   | 133  |
| Query      | 946 | AAATATAGCCTTTAAATCATTTTATATATAACTCTGTATAATAGAGATAAGTCCATTTTTTAAAAATGTTTTTCCCAAAACCATAAACCCCTATACAAGTTGTTCTAGTAAACAATACATGAGAAAGATGTCTATGTAGCTGAAAAATAAA | 1095 |
| BU857810.1 | 651 | .....N.....                                                                                                                                             | 800  |
| CN386790.1 | 618 | .....N.....G.....                                                                                                                                       | 766  |
| BQ228162.1 | 805 | .....G.....                                                                                                                                             | 957  |



```

      \      \      \
      |      |      |
      G      G      A
CA447733.1 181 ..... 32
CA423056.1 183 ..... 34
BE614257.1 152 ..... 6
      \
      |
      T
BQ776006.1 181 ..... 32
AL576603.2 139 ..... 1
      \
      |
      C
AL576340.3 143 ..... 5
      \
      |
      N
AL576223.3 132 ..... 1
      \
      |
      B
Query      1096  ATGACGTC  1103
BU857810.1 801 ..... 808
BQ228162.1 958 ..... 965
CA447733.1 31 ..... 24
CA423056.1 33 ..... 26
BQ776006.1 31 ..... 24
```

Query= T18-19 [organism=Homo sapiens] anxa1  
Length=1170

| Sequences producing significant alignments: |                            |                              | Score<br>(Bits) | E<br>Value | Max<br>ident |
|---------------------------------------------|----------------------------|------------------------------|-----------------|------------|--------------|
| CA447733.1                                  | UI-H-EI0-ayf-a-16-0-UI.s1  | NCI_CGAP_EI0 Homo sapiens... | 1319            | 0.0        | 100%         |
| CB306442.1                                  | UI-CF-EN1-aej-e-15-0-UI.s1 | UI-CF-EN1 Homo sapiens c...  | 1315            | 0.0        | 100%         |
| CA418062.1                                  | UI-H-FH0-bcc-j-24-0-UI.s1  | NCI_CGAP_FH0 Homo sapiens... | 1315            | 0.0        | 100%         |
| BQ776006.1                                  | UI-H-FH0-bcc-h-18-0-UI.s1  | NCI_CGAP_FH0 Homo sapiens... | 1315            | 0.0        | 100%         |
| CA423056.1                                  | UI-H-FL0-bdk-f-10-0-UI.s1  | NCI_CGAP_FL0 Homo sapiens... | 1314            | 0.0        | 100%         |
| CA418210.1                                  | UI-H-FH0-bcf-i-22-0-UI.s1  | NCI_CGAP_FH0 Homo sapiens... | 1312            | 0.0        | 100%         |
| CA443862.1                                  | UI-H-DP0-avg-a-20-0-UI.s1  | NCI_CGAP_Fs1 Homo sapiens... | 1310            | 0.0        | 100%         |
| BQ774641.1                                  | UI-H-FH0-bcc-l-13-0-UI.s1  | NCI_CGAP_FH0 Homo sapiens... | 1308            | 0.0        | 100%         |
| CA447223.1                                  | UI-H-EI0-ayd-b-19-0-UI.s1  | NCI_CGAP_EI0 Homo sapiens... | 1303            | 0.0        | 100%         |
| BQ775843.1                                  | UI-H-FH0-bcg-e-23-0-UI.s1  | NCI_CGAP_FH0 Homo sapiens... | 1301            | 0.0        | 100%         |

#### ALIGNMENTS

```

Query      457  AGGCCTTGTATGAAGCAGGAGAAAGGAGAAAGGGGACAGACGTTAAACGTGTTCAATACCATCCTTACCACGAGCTATCCACAACCTTCGCAGAGTGTTCAGAAATACACCAAGTACAGTAAGCATGACATGAACAAAGTTCTGGAC 606
CA447733.1 732 ..... 583
CB306442.1 732 ...N..... 583
CA418062.1 732 .....N..... 583
BQ776006.1 732 .....N..... 583
CA423056.1 734 ..... 585
CA418210.1 728 ..... 580
CA443862.1 732 .....C.....N..... 583
BQ774641.1 729 ..... 583
CA447223.1 723 ..... 583
BQ775843.1 721 .....N..... 580

Query      607  CTGGAGTTGAAAGGTGACATTGAGAAATGCCTCACAGCTATCGTGAAGTGCGCCACAAGCAAAACCAGCTTTCTTTGCAGAGAAGCTTCATCAAGCCATGAAAGGTGTGGAACCTGCCATAAGGCATTGATCAGGATTATGGTTTCCCGT 756
CA447733.1 582 ..... 433
CB306442.1 582 ..... 433
CA418062.1 582 ..... 433
BQ776006.1 582 ..... 433
CA423056.1 584 ..... 435
CA418210.1 579 ..... 430
CA443862.1 582 ..... 433
BQ774641.1 582 ..... 433
CA447223.1 582 ..... 433
BQ775843.1 579 ..... 430

Query      757  TCTGAAATTGACATGAATGATATCAAGCATTCTATCAGAAGATGTATGGTATCTCCCTTTGCCAAGCCATCTCGATGAACCAAGGAGATTATGAGAAAATCCTGGTGGCTCTTTGTGGAGGAAACTAAACATTCCCTTGATGGTCT 906
CA447733.1 432 ..... 283
CB306442.1 432 ..... 283
CA418062.1 432 ..... 283
BQ776006.1 432 ..... 283
CA423056.1 434 ..... 285
CA418210.1 429 ..... 280
CA443862.1 432 ..... 283
BQ774641.1 432 ..... 283
CA447223.1 432 ..... 283
```

|            |     |                                                                                                                                                       |      |
|------------|-----|-------------------------------------------------------------------------------------------------------------------------------------------------------|------|
| BQ775843.1 | 429 | .....                                                                                                                                                 | 280  |
| Query      | 907 | CAAGCTATGATCAGAAGCTTTAATTATATATTTTCATCCTATAAGCTTAAATAGGAAAGTTTCTTCAACAGGATTACAGTGTAGCTACCTACATGCTGAAAAATATAGCCTTTAAATCATTTTTATATTATAACTCTGTATAATAGAGA | 1056 |
| CA447733.1 | 282 | .....                                                                                                                                                 | 133  |
| CB306442.1 | 282 | .....                                                                                                                                                 | 133  |
| CA418062.1 | 282 | .....                                                                                                                                                 | 133  |
| BQ776006.1 | 282 | .....                                                                                                                                                 | 133  |
| CA423056.1 | 284 | .....                                                                                                                                                 | 135  |
| CA418210.1 | 279 | .....                                                                                                                                                 | 130  |
| CA443862.1 | 282 | .....                                                                                                                                                 | 133  |
| BQ774641.1 | 282 | .....                                                                                                                                                 | 133  |
| CA447223.1 | 282 | .....                                                                                                                                                 | 133  |
| BQ775843.1 | 279 | .....                                                                                                                                                 | 130  |

|            |      |                                                                                                                     |      |
|------------|------|---------------------------------------------------------------------------------------------------------------------|------|
| Query      | 1057 | TAAGTCCATTTTTTAAAAATGTTTTTCCCAAACCATAAAAACCTATACAAGTTGTTCTAGTAACANTACATGAGAAAGATGTTCTATGTAGCTGAAAAATAAATGACGTCACAAG | 1170 |
| CA447733.1 | 132  | .....                                                                                                               | 19   |
| CB306442.1 | 132  | .....                                                                                                               | 19   |
| CA418062.1 | 132  | .....                                                                                                               | 19   |
| BQ776006.1 | 132  | .....                                                                                                               | 19   |
| CA423056.1 | 134  | .....G.....                                                                                                         | 21   |
| CA418210.1 | 129  | .....                                                                                                               | 16   |
| CA443862.1 | 132  | .....                                                                                                               | 19   |
| BQ774641.1 | 132  | .....                                                                                                               | 19   |
| CA447223.1 | 132  | .....                                                                                                               | 19   |
| BQ775843.1 | 129  | .....                                                                                                               | 16   |

Query= T19-6 [organism=Homo sapiens] anxl

Length=1210

| Sequences producing significant alignments:                       | Score<br>(Bits) | E<br>Value | Max<br>ident |
|-------------------------------------------------------------------|-----------------|------------|--------------|
| CA447733.1 UI-H-EI0-ayf-a-16-0-UI.s1 NCI_CGAP_EI0 Homo sapiens... | 1360            | 0.0        | 100%         |
| CA423056.1 UI-H-FL0-bdk-f-10-0-UI.s1 NCI_CGAP_FL0 Homo sapiens... | 1354            | 0.0        | 100%         |
| BQ776006.1 UI-H-FH0-bck-h-18-0-UI.s1 NCI_CGAP_FH0 Homo sapiens... | 1345            | 0.0        | 99%          |
| BU857810.1 AGENCOURT_10474308 NIH_MGC_107 Homo sapiens cDNA cl... | 1336            | 0.0        | 99%          |
| CB306442.1 UI-CF-EN1-aej-e-15-0-UI.s1 UI-CF-EN1 Homo sapiens c... | 1330            | 0.0        | 100%         |
| CA418062.1 UI-H-FH0-bcc-j-24-0-UI.s1 NCI_CGAP_FH0 Homo sapiens... | 1330            | 0.0        | 100%         |
| BM981135.1 UI-CF-EN1-adg-a-11-0-UI.s1 UI-CF-EN1 Homo sapiens c... | 1330            | 0.0        | 99%          |
| CN386790.1 17000599887650 GRN_PRENEU Homo sapiens cDNA 5', mRN... | 1328            | 0.0        | 100%         |
| CA418210.1 UI-H-FH0-bcf-i-22-0-UI.s1 NCI_CGAP_FH0 Homo sapiens... | 1328            | 0.0        | 100%         |
| CA443862.1 UI-H-DP0-avg-a-20-0-UI.s1 NCI_CGAP_Fs1 Homo sapiens... | 1327            | 0.0        | 99%          |

#### ALIGNMENTS

|            |     |                                                                                                                                                          |     |
|------------|-----|----------------------------------------------------------------------------------------------------------------------------------------------------------|-----|
| Query      | 472 | ATGAAGACTTGGCTGATTGATCAGATGCCAGGGCCTTGATGAAGCAGGAGAAAGGAGAAAGGGGACAGACGTAACGTTGTTCAATACCATCCTTACCACCAGAAGCTATCCACAACCTTCGCAGAGTGTTCAGAAATACACCAAGTACAGTA | 621 |
| CA447733.1 | 758 | .....                                                                                                                                                    | 609 |
| CA423056.1 | 760 | .....                                                                                                                                                    | 611 |
| BQ776006.1 | 758 | .....-.....N.....                                                                                                                                        | 609 |

\
   
 |
   
 T

|            |     |                   |     |
|------------|-----|-------------------|-----|
| BU857810.1 | 74  | .....             | 223 |
| CB306442.1 | 744 | .....N.....       | 609 |
| CA418062.1 | 744 | .....N.....       | 609 |
| BM981135.1 | 754 | .....-.....N..... | 609 |
| CN386790.1 | 41  | .....             | 190 |
| CA418210.1 | 740 | .....-.....       | 606 |
| CA443862.1 | 748 | .....C.....N..... | 609 |

\
   
 |
   
 T

|            |     |                                                                                                                                                       |     |
|------------|-----|-------------------------------------------------------------------------------------------------------------------------------------------------------|-----|
| Query      | 622 | AGCATGACATGAACAAAGTTCTGGACCTGGAGTTGAAAGGTGACATTGAGAAATGCCTCACAGCTATCGTGAAGTGCGCCACAAGCAAACGAGCTTCTTTGCAGAGAAGCTTCATCAAGCCATGAAAGGTGTTGGAACCTGCCATAAGS | 771 |
| CA447733.1 | 608 | .....                                                                                                                                                 | 459 |
| CA423056.1 | 610 | .....                                                                                                                                                 | 461 |
| BQ776006.1 | 608 | .....                                                                                                                                                 | 459 |
| BU857810.1 | 224 | .....                                                                                                                                                 | 373 |
| CB306442.1 | 608 | .....                                                                                                                                                 | 459 |
| CA418062.1 | 608 | .....                                                                                                                                                 | 459 |
| BM981135.1 | 608 | .....                                                                                                                                                 | 459 |
| CN386790.1 | 191 | .....                                                                                                                                                 | 340 |
| CA418210.1 | 605 | .....                                                                                                                                                 | 456 |
| CA443862.1 | 608 | .....                                                                                                                                                 | 459 |

|            |     |                                                                                                                                                           |     |
|------------|-----|-----------------------------------------------------------------------------------------------------------------------------------------------------------|-----|
| Query      | 772 | CATTGATCAGGATTATGGTTTCCCGTTCTGAAATTGACATGAATGATATCAAAGCAATTTCTATCAGAAGATGTATGGTATCTCCCTTTGCCAAGCCATCCTGGATGAAACCAAAGGAGATTATGAGAAAAATCCTGGTGGCTCTTTGTGGAG | 921 |
| CA447733.1 | 458 | .....                                                                                                                                                     | 309 |
| CA423056.1 | 460 | .....                                                                                                                                                     | 311 |
| BQ776006.1 | 458 | .....                                                                                                                                                     | 309 |
| BU857810.1 | 374 | .....                                                                                                                                                     | 523 |

|            |      |                                                                                                                                                    |      |
|------------|------|----------------------------------------------------------------------------------------------------------------------------------------------------|------|
| CB306442.1 | 458  | .....                                                                                                                                              | 309  |
| CA418062.1 | 458  | .....                                                                                                                                              | 309  |
| BM981135.1 | 458  | .....                                                                                                                                              | 309  |
| CN386790.1 | 341  | .....                                                                                                                                              | 490  |
| CA418210.1 | 455  | .....                                                                                                                                              | 306  |
| CA443862.1 | 458  | .....                                                                                                                                              | 309  |
| Query      | 922  | GAAACTAAACATTCCCTTGTGCTCAAGCTATGATCAGAAGACTTTAATTATATATTTTCATCCTATAAGCTTAAATAGGAAGTTTCTTCAACAGGATTACAGTGTAGCTACCTACATGCTGAAAAATATAGCTTTAAATCATTTTT | 1071 |
| CA447733.1 | 308  | .....                                                                                                                                              | 158  |
| CA423056.1 | 310  | .....                                                                                                                                              | 160  |
| BQ776006.1 | 308  | .....                                                                                                                                              | 158  |
| BU857810.1 | 524  | .....N.....                                                                                                                                        | 674  |
| CB306442.1 | 308  | .....                                                                                                                                              | 158  |
| CA418062.1 | 308  | .....                                                                                                                                              | 158  |
| BM981135.1 | 308  | .....                                                                                                                                              | 158  |
| CN386790.1 | 491  | .....                                                                                                                                              | 641  |
| CA418210.1 | 305  | .....                                                                                                                                              | 155  |
| CA443862.1 | 308  | .....                                                                                                                                              | 158  |
| Query      | 1072 | ATATTATAACTCTGTATAATAGAGATAAGTCCATTTTTTAAAAATGTTTTCCCAAACCATAAACCCTATACAAGTTGTTCTAGTAACAATACATGAGAAAGATGTTCTATGTAGCTGAAAAATAAAATGACGTCACAAG        | 1210 |
| CA447733.1 | 157  | .....                                                                                                                                              | 19   |
| CA423056.1 | 159  | .....G.....                                                                                                                                        | 21   |
| BQ776006.1 | 157  | .....                                                                                                                                              | 19   |
| BU857810.1 | 675  | .....N.....N.....                                                                                                                                  | 808  |
| CB306442.1 | 157  | .....                                                                                                                                              | 19   |
| CA418062.1 | 157  | .....                                                                                                                                              | 19   |
| BM981135.1 | 157  | .....                                                                                                                                              | 19   |
| CN386790.1 | 642  | .....G.....                                                                                                                                        | 766  |
| CA418210.1 | 154  | .....                                                                                                                                              | 16   |
| CA443862.1 | 157  | .....                                                                                                                                              | 19   |

Query= T21-l1 [organism=Homo sapiens] anxa1

Length=989

| Sequences producing significant alignments:                       |                 |            |              |
|-------------------------------------------------------------------|-----------------|------------|--------------|
|                                                                   | Score<br>(Bits) | E<br>Value | Max<br>ident |
| CA447733.1 UI-H-EI0-ayf-a-16-0-UI.s1 NCI_CGAP EI0 Homo sapiens... | 1369            | 0.0        | 100%         |
| CA423056.1 UI-H-FL0-bdk-f-10-0-UI.s1 NCI_CGAP FL0 Homo sapiens... | 1363            | 0.0        | 100%         |
| BU857810.1 AGENCOURT_10474308 NIH_MGC_107 Homo sapiens cDNA cl... | 1354            | 0.0        | 99%          |
| BQ776006.1 UI-H-FH0-bck-h-18-0-UI.s1 NCI_CGAP FH0 Homo sapiens... | 1354            | 0.0        | 100%         |
| CN386790.1 17000599887650 GRN PRENEU Homo sapiens cDNA 5', mRN... | 1349            | 0.0        | 100%         |
| BQ228162.1 AGENCOURT_7258587 NIH_MGC_71 Homo sapiens cDNA clon... | 1345            | 0.0        | 99%          |
| BM981135.1 UI-CF-EN1-adq-a-11-0-UI.s1 UI-CF-EN1 Homo sapiens c... | 1338            | 0.0        | 99%          |
| BE614257.1 601504294T1 NIH_MGC_71 Homo sapiens cDNA clone IMAG... | 1328            | 0.0        | 99%          |
| CB306442.1 UI-CF-EN1-aej-e-15-0-UI.s1 UI-CF-EN1 Homo sapiens c... | 1327            | 0.0        | 100%         |
| CA418062.1 UI-H-FH0-bcc-j-24-0-UI.s1 NCI_CGAP FH0 Homo sapiens... | 1327            | 0.0        | 100%         |

ALIGNMENTS

|            |     |                                                                                                                                                         |     |
|------------|-----|---------------------------------------------------------------------------------------------------------------------------------------------------------|-----|
| Query      | 249 | GGTGTGAATGAAGACTTGGCTGATTGATGCCAGGGCCTTGTATGAAGCAGGAGAAAGGAGAAAGGGGACAGACGTAAACGTTTCAATACCATCCTTACCACGAGAAGCTATCCACAACCTTCGAGAGTGTTCAGAAATACCCANG       | 398 |
| CA447733.1 | 765 | .....                                                                                                                                                   | 616 |
| CA423056.1 | 767 | .....                                                                                                                                                   | 618 |
| BU857810.1 | 67  | .....                                                                                                                                                   | 216 |
| BQ776006.1 | 765 | .....N.....                                                                                                                                             | 616 |
|            |     | <div> <div> </div> <div> </div> <div> </div> </div>                                                                                                     |     |
| CN386790.1 | 34  | .....                                                                                                                                                   | 183 |
| BQ228162.1 | 220 | .....                                                                                                                                                   | 369 |
| BM981135.1 | 760 | .....N.....                                                                                                                                             | 616 |
| BE614257.1 | 736 | .....                                                                                                                                                   | 587 |
| CB306442.1 | 744 | .....N.....                                                                                                                                             | 616 |
| CA418062.1 | 744 | .....N.....                                                                                                                                             | 616 |
| Query      | 399 | TACAGTAAGCATGACATGAACAAAGTTCTGGACCTGGAGTTGAAAGGTGACATTGAGAAATGCCTCACAGCTATCGTGAAGTGCGCCACAAGCAAACCCAGCTTTCTTTGCAGAGAAGCTTCATCAAGCCATGAAAGGTGTGGAACTCGC  | 548 |
| CA447733.1 | 615 | .....                                                                                                                                                   | 466 |
| CA423056.1 | 617 | .....                                                                                                                                                   | 468 |
| BU857810.1 | 217 | .....                                                                                                                                                   | 366 |
| BQ776006.1 | 615 | .....                                                                                                                                                   | 466 |
| CN386790.1 | 184 | .....                                                                                                                                                   | 333 |
| BQ228162.1 | 370 | .....                                                                                                                                                   | 519 |
| BM981135.1 | 615 | .....                                                                                                                                                   | 466 |
| BE614257.1 | 586 | .....                                                                                                                                                   | 437 |
| CB306442.1 | 615 | .....                                                                                                                                                   | 466 |
| CA418062.1 | 615 | .....                                                                                                                                                   | 466 |
| Query      | 549 | CATAAGGCATTGATCAGGATTATGTTTCCCGTCTGAAATTGACATGAATGATATCAAAGCATTCTATCAGAAGATGTATGGTATCTCCCTTTGCCAAGCCATCCTGGATGAAACCAAAGGAGATTATGAGAAAATCCTGGTGGCTCTT    | 698 |
| CA447733.1 | 465 | .....                                                                                                                                                   | 316 |
| CA423056.1 | 467 | .....                                                                                                                                                   | 318 |
| BU857810.1 | 367 | .....                                                                                                                                                   | 516 |
| BQ776006.1 | 465 | .....                                                                                                                                                   | 316 |
| CN386790.1 | 334 | .....                                                                                                                                                   | 483 |
| BQ228162.1 | 520 | .....                                                                                                                                                   | 669 |
| BM981135.1 | 465 | .....                                                                                                                                                   | 316 |
| BE614257.1 | 436 | .....                                                                                                                                                   | 287 |
| CB306442.1 | 465 | .....                                                                                                                                                   | 316 |
| CA418062.1 | 465 | .....                                                                                                                                                   | 316 |
| Query      | 699 | TGTGGAGAAACTAAACATTCCCTTGTATGGTCTCAAGCTATGATCAGAAGACTTTAAATTATATATTTTCATCCTATAAGCTTAAATAGGAAAGTTTCTTCAACAGGATTACAGTGTAGCTACCTACATGCTGAAAAATATAGCCTTTAAA | 848 |
| CA447733.1 | 315 | .....                                                                                                                                                   | 166 |
| CA423056.1 | 317 | .....                                                                                                                                                   | 168 |
| BU857810.1 | 517 | .....N.....                                                                                                                                             | 666 |
| BQ776006.1 | 315 | .....                                                                                                                                                   | 166 |
| CN386790.1 | 484 | .....                                                                                                                                                   | 633 |
| BQ228162.1 | 670 | .....                                                                                                                                                   | 820 |
|            |     | <div> <div> </div> <div> </div> <div> </div> </div>                                                                                                     |     |
| BM981135.1 | 315 | .....                                                                                                                                                   | 166 |
| BE614257.1 | 286 | .....                                                                                                                                                   | 137 |
| CB306442.1 | 315 | .....                                                                                                                                                   | 166 |
| CA418062.1 | 315 | .....                                                                                                                                                   | 166 |
| Query      | 849 | TCATTTTATATTATAACTCTGTATAATAGAGATAAGTCCATTTTAAAAATGTTTCCCCAAACCATAAACCCATATACAGTTGTTCTAGTAACATACATGAGAAAGATGTCTATGTAGCTGAAAAATAAATGACGT                 | 989 |
| CA447733.1 | 165 | .....                                                                                                                                                   | 25  |
| CA423056.1 | 167 | .....G.....                                                                                                                                             | 27  |
| BU857810.1 | 667 | .....N.....N.....                                                                                                                                       | 807 |
| BQ776006.1 | 165 | .....                                                                                                                                                   | 25  |
| CN386790.1 | 634 | .....G.....                                                                                                                                             | 766 |
| BQ228162.1 | 821 | .....G.....                                                                                                                                             | 964 |
|            |     | <div> <div> </div> <div> </div> <div> </div> </div>                                                                                                     |     |
| BM981135.1 | 165 | .....                                                                                                                                                   | 25  |
| BE614257.1 | 136 | .....T.A-.....                                                                                                                                          | 6   |
|            |     | <div> <div> </div> <div> </div> <div> </div> </div>                                                                                                     |     |
| CB306442.1 | 165 | .....                                                                                                                                                   | 25  |
| CA418062.1 | 165 | .....                                                                                                                                                   | 25  |

Query= T22-21 [organism=Homo sapiens] anxa1

Length=1084

| Sequences producing significant alignments:                       | Score<br>(Bits) | E<br>Value | Max<br>ident |
|-------------------------------------------------------------------|-----------------|------------|--------------|
| CB306442.1 UI-CF-EN1-aej-e-15-0-UI.s1 UI-CF-EN1 Homo sapiens c... | 1288            | 0.0        | 100%         |
| CA447733.1 UI-H-EI0-ayf-a-16-0-UI.s1 NCI_CGAP_EI0 Homo sapiens... | 1288            | 0.0        | 100%         |

|            |                           |              |                 |      |     |      |
|------------|---------------------------|--------------|-----------------|------|-----|------|
| CA447223.1 | UI-H-EI0-ayd-b-19-0-UI.s1 | NCI_CGAP_EI0 | Homo sapiens... | 1288 | 0.0 | 100% |
| CA422748.1 | UI-H-FL0-bdr-g-09-0-UI.s1 | NCI_CGAP_FL0 | Homo sapiens... | 1288 | 0.0 | 100% |
| CA419844.1 | UI-H-FH0-bcm-d-16-0-UI.s1 | NCI_CGAP_FH0 | Homo sapiens... | 1288 | 0.0 | 100% |
| CA417462.1 | UI-H-FE0-bbw-c-13-0-UI.s1 | NCI_CGAP_FE0 | Homo sapiens... | 1288 | 0.0 | 100% |
| CA415613.1 | UI-H-EZ0-bay-p-10-0-UI.s1 | NCI_CGAP_Ch1 | Homo sapiens... | 1288 | 0.0 | 100% |
| CA414702.1 | UI-H-EZ0-bar-e-18-0-UI.s1 | NCI_CGAP_Ch1 | Homo sapiens... | 1288 | 0.0 | 100% |
| BU633206.1 | UI-H-FL1-bgt-f-12-0-UI.s1 | NCI_CGAP_FL1 | Homo sapiens... | 1288 | 0.0 | 100% |
| BQ776306.1 | UI-H-FH0-bcn-i-12-0-UI.s1 | NCI_CGAP_FH0 | Homo sapiens... | 1288 | 0.0 | 100% |

ALIGNMENTS

|            |     |                                                                                                                                                          |      |
|------------|-----|----------------------------------------------------------------------------------------------------------------------------------------------------------|------|
| Query      | 388 | AGGAGAAAGGAGAAAGGGGACAGACGTAAACGTGTTCAATACCATCCTTACCACCAGAAGCTATCCACAACCTTCGCAGAGTGTTCAGAAATACACCAAGTACAGTAAGCATGACATGAACAAAGTTCTGGACCTGGAGTTGAAAGGTGA   | 537  |
| CB306442.1 | 715 | .....                                                                                                                                                    | 566  |
| CA447733.1 | 715 | .....                                                                                                                                                    | 566  |
| CA447223.1 | 715 | .....                                                                                                                                                    | 566  |
| CA422748.1 | 717 | .....                                                                                                                                                    | 568  |
| CA419844.1 | 715 | .....                                                                                                                                                    | 566  |
| CA417462.1 | 712 | .....                                                                                                                                                    | 563  |
| CA415613.1 | 717 | .....                                                                                                                                                    | 568  |
| CA414702.1 | 717 | .....                                                                                                                                                    | 568  |
| BU633206.1 | 715 | .....                                                                                                                                                    | 566  |
| BQ776306.1 | 715 | .....                                                                                                                                                    | 566  |
| Query      | 538 | CATTGAGAAATGCCCTCACAGCTATCGTGAAGTGCGCCACAAGCAAAACGAGCTTTCTTTGCAGAGAAGCTTCATCAAGCCATGAAAGGTGTTGGAACCTCGCCATAAGGCATTGATCAGGATTATGGTTTCCGGTCTGAAATTGACATGAA | 687  |
| CB306442.1 | 565 | .....                                                                                                                                                    | 416  |
| CA447733.1 | 565 | .....                                                                                                                                                    | 416  |
| CA447223.1 | 565 | .....                                                                                                                                                    | 416  |
| CA422748.1 | 567 | .....                                                                                                                                                    | 418  |
| CA419844.1 | 565 | .....                                                                                                                                                    | 416  |
| CA417462.1 | 562 | .....                                                                                                                                                    | 413  |
| CA415613.1 | 567 | .....                                                                                                                                                    | 418  |
| CA414702.1 | 567 | .....                                                                                                                                                    | 418  |
| BU633206.1 | 565 | .....                                                                                                                                                    | 416  |
| BQ776306.1 | 565 | .....                                                                                                                                                    | 416  |
| Query      | 688 | TGATATCAAAGCATTCATCAGAAGATGTATGGTATCTCCCTTTGCCAAGCCATCCTGGATGAAACCAAGGAGATTATGAGAAAATCCTGGTGGCTCTTTGTGGAGGAACTAAACATTCCCTTGATGGTCTCAAGCTATGATCAGAAG      | 837  |
| CB306442.1 | 415 | .....                                                                                                                                                    | 266  |
| CA447733.1 | 415 | .....                                                                                                                                                    | 266  |
| CA447223.1 | 415 | .....                                                                                                                                                    | 266  |
| CA422748.1 | 417 | .....                                                                                                                                                    | 268  |
| CA419844.1 | 415 | .....                                                                                                                                                    | 266  |
| CA417462.1 | 412 | .....                                                                                                                                                    | 263  |
| CA415613.1 | 417 | .....                                                                                                                                                    | 268  |
| CA414702.1 | 417 | .....                                                                                                                                                    | 268  |
| BU633206.1 | 415 | .....                                                                                                                                                    | 266  |
| BQ776306.1 | 415 | .....                                                                                                                                                    | 266  |
| Query      | 838 | ACTTTAATTATATATTTTCATCCTATAAGCTTAAATAGGAAAGTTTCTTCAACAGGATTACAGTGTAGCTACCTACATGCTGAAAAATATAGCCTTTAAATCATTTTATATTTATACTCTGTATAATAGAGATAAGTCATTTTTTAA      | 987  |
| CB306442.1 | 265 | .....                                                                                                                                                    | 116  |
| CA447733.1 | 265 | .....                                                                                                                                                    | 116  |
| CA447223.1 | 265 | .....                                                                                                                                                    | 116  |
| CA422748.1 | 267 | .....                                                                                                                                                    | 118  |
| CA419844.1 | 265 | .....                                                                                                                                                    | 116  |
| CA417462.1 | 262 | .....                                                                                                                                                    | 113  |
| CA415613.1 | 267 | .....                                                                                                                                                    | 118  |
| CA414702.1 | 267 | .....                                                                                                                                                    | 118  |
| BU633206.1 | 265 | .....                                                                                                                                                    | 116  |
| BQ776306.1 | 265 | .....                                                                                                                                                    | 116  |
| Query      | 988 | AATGTTTTCCCCAAACCATAAAACCCCTATACAAGTTGTTCTAGTAACAATACATGAGAAAGATGTCATATGTAGCTGAAAAATAAAATGACGTCACAAG                                                     | 1084 |
| CB306442.1 | 115 | .....                                                                                                                                                    | 19   |
| CA447733.1 | 115 | .....                                                                                                                                                    | 19   |
| CA447223.1 | 115 | .....                                                                                                                                                    | 19   |
| CA422748.1 | 117 | .....                                                                                                                                                    | 21   |
| CA419844.1 | 115 | .....                                                                                                                                                    | 19   |
| CA417462.1 | 112 | .....                                                                                                                                                    | 16   |
| CA415613.1 | 117 | .....                                                                                                                                                    | 21   |
| CA414702.1 | 117 | .....                                                                                                                                                    | 21   |
| BU633206.1 | 115 | .....                                                                                                                                                    | 19   |
| BQ776306.1 | 115 | .....                                                                                                                                                    | 19   |

Database: Database of GenBank+EMBL+DDBJ sequences from EST Divisions  
Posted date: Feb 24, 2019 1:46 AM  
Number of letters in database: 43,200,890,307  
Number of sequences in database: 77,566,966

|        |       |       |
|--------|-------|-------|
| Lambda | K     | H     |
| 1.33   | 0.621 | 1.12  |
| Gapped |       |       |
| Lambda | K     | H     |
| 1.28   | 0.460 | 0.850 |

Matrix: blastn matrix:1 ~2

Gap Penalties: Existence: 0, Extension: 0  
Number of Sequences: 77566966  
Number of Hits to DB: 3240899  
Number of extensions: 1347  
Number of successful extensions: 1347  
Number of sequences better than 10: 64  
Number of HSP's better than 10 without gapping: 0  
Number of HSP's gapped: 1343  
Number of HSP's successfully gapped: 1343  
Length of database: 43200890307  
A: 0  
X1: 13 (25.0 bits)  
X2: 32 (59.1 bits)  
X3: 54 (99.7 bits)  
S1: 13 (25.1 bits)  
BLASTN 2.9.0+  
Reference: Zheng Zhang, Scott Schwartz, Lukas Wagner, and  
Webb Miller (2000), "A greedy algorithm for aligning DNA  
sequences", J Comput Biol 2000; 7(1-2):203-14.

RID: 8RBRB7KC015

Database: Database of GenBank+EMBL+DBJ sequences from EST Divisions  
77,566,966 sequences; 43,200,890,307 total letters  
Query= N1-C [organism=Homo sapiens] anxa1  
Length=1485

| Sequences producing significant alignments: |                                                        | Score<br>(Bits)                                                                                                                                       | E<br>Value | Max<br>ident |
|---------------------------------------------|--------------------------------------------------------|-------------------------------------------------------------------------------------------------------------------------------------------------------|------------|--------------|
| BU508007.1                                  | AGENCOURT_10128424 NIH MGC 71 Homo sapiens cDNA clo... | 1929                                                                                                                                                  | 0.0        | 98%          |
| AL570428.3                                  | AL570428 Homo sapiens PLACENTA COT 25-NORMALIZED Ho... | 1910                                                                                                                                                  | 0.0        | 98%          |
| AL544231.3                                  | AL544231 Homo sapiens PLACENTA COT 25-NORMALIZED Ho... | 1905                                                                                                                                                  | 0.0        | 98%          |
| DC631365.1                                  | DC631365 macaque bone marrow cDNA library Qbma Maca... | 1879                                                                                                                                                  | 0.0        | 94%          |
| DC636772.1                                  | DC636772 macaque bone marrow cDNA library Qbma Maca... | 1853                                                                                                                                                  | 0.0        | 94%          |
| AL541874.3                                  | AL541874 Homo sapiens PLACENTA Homo sapiens cDNA cl... | 1853                                                                                                                                                  | 0.0        | 99%          |
| BU902298.1                                  | AGENCOURT_10127317 NIH MGC 71 Homo sapiens cDNA clo... | 1847                                                                                                                                                  | 0.0        | 96%          |
| BX438944.2                                  | BX438944 Homo sapiens PLACENTA Homo sapiens cDNA cl... | 1844                                                                                                                                                  | 0.0        | 99%          |
| AL553114.3                                  | AL553114 Homo sapiens PLACENTA COT 25-NORMALIZED Ho... | 1842                                                                                                                                                  | 0.0        | 99%          |
| AL576223.3                                  | AL576223 Homo sapiens PLACENTA COT 25-NORMALIZED Ho... | 1831                                                                                                                                                  | 0.0        | 98%          |
| ALIGNMENTS                                  |                                                        |                                                                                                                                                       |            |              |
| Query                                       | 2                                                      | AAACAGAGGCCCAATTACTAATCTCTGGTTGCTAGGTGTGGCTTCCTTTAAAAATCCTATAAAATCAGAGCCCAAGTCTCCACTGCCAGTGTGAAATCTTCAGAGAAGATTCTCTTTAGTTCTTTGCAAGAAGGTAGAGATAAAG     | 151        |              |
| BU508007.1                                  | 1                                                      | .....                                                                                                                                                 | 40         |              |
| AL544231.3                                  | 19                                                     | .....T.....                                                                                                                                           | 61         |              |
| DC631365.1                                  | 1                                                      | .....-.....C.C.....                                                                                                                                   | 59         |              |
| DC636772.1                                  | 1                                                      | .....-.....C.C.....                                                                                                                                   | 59         |              |
| AL541874.3                                  | 1                                                      | .....                                                                                                                                                 | 35         |              |
| BU902298.1                                  | 24                                                     | .....                                                                                                                                                 | 73         |              |
| BX438944.2                                  | 1                                                      | .....                                                                                                                                                 | 43         |              |
| AL553114.3                                  | 17                                                     | .....                                                                                                                                                 | 166        |              |
| Query                                       | 152                                                    | ACACTTTTTCAAAAATGGCAATGGTATCAGAATTCCTCAAGCAGGCCTGGTTTATTGAAAATGAAGAGCAGGAATATGTTCAAAGTGTGAAGTCATCCAAAGGTGGTCCCGGATCAGCGGTGAGCCCTATCCTACCTTCAATCCATCCT | 301        |              |
| BU508007.1                                  | 41                                                     | .....                                                                                                                                                 | 191        |              |
|                                             |                                                        | \<br> <br>N                                                                                                                                           |            |              |
| AL544231.3                                  | 62                                                     | .....                                                                                                                                                 | 211        |              |
| DC631365.1                                  | 60                                                     | .....A.....T.....A.....                                                                                                                               | 209        |              |
| DC636772.1                                  | 60                                                     | .....A.....T.....A.....                                                                                                                               | 209        |              |
| AL541874.3                                  | 36                                                     | .....                                                                                                                                                 | 185        |              |
| BU902298.1                                  | 74                                                     | .....                                                                                                                                                 | 224        |              |
|                                             |                                                        | \<br> <br>N                                                                                                                                           |            |              |
| BX438944.2                                  | 44                                                     | .....                                                                                                                                                 | 193        |              |
| AL553114.3                                  | 167                                                    | .....                                                                                                                                                 | 316        |              |
| Query                                       | 302                                                    | CGGATGTCGCTCCTTCGATAAGGCCATAATGGTTAAAGGTGTGGATGAAGCAACCATTCATTGACATTCTAACTAAGCGAAACAATGCACAGCGTCAACAGATCAAAGCAGCATATCTCCAGGAAACAGGAAAGCCCTGGATGAAACAC | 451        |              |
| BU508007.1                                  | 192                                                    | .....                                                                                                                                                 | 341        |              |
| AL570428.3                                  | 1088                                                   | .....-T.....-.....T.....-A...-.....W.....-.....GC.....                                                                                                | 1011       |              |
| AL544231.3                                  | 212                                                    | .....                                                                                                                                                 | 361        |              |
| DC631365.1                                  | 210                                                    | .....T.....C.....                                                                                                                                     | 359        |              |
| DC636772.1                                  | 210                                                    | .....C.....                                                                                                                                           | 359        |              |
| AL541874.3                                  | 186                                                    | .....                                                                                                                                                 | 335        |              |
| BU902298.1                                  | 225                                                    | .....                                                                                                                                                 | 374        |              |
| BX438944.2                                  | 194                                                    | .....                                                                                                                                                 | 343        |              |

|            |      |                                                                                                                                                       |      |
|------------|------|-------------------------------------------------------------------------------------------------------------------------------------------------------|------|
| AL553114.3 | 317  | .....                                                                                                                                                 | 466  |
| AL576223.3 | 1050 | .....-W.....-R.....-Y.....-.....-R.....                                                                                                               | 1002 |
| Query      | 452  | TGAAGAAAGCCCTTACAGGTCACCTTGAGGAGGTGTTTTAGCTCTGCTAAAACTCCAGCGCAATTTGATGCTGATGAACCTCGTGCTGCCATGAAGGGCCTTGGAACTGATGAAGATACTCTAATTGAGATTTTGGCATCAAGAACTA  | 601  |
| BU508007.1 | 342  | .....                                                                                                                                                 | 491  |
| AL570428.3 | 1010 | .....-Y.....                                                                                                                                          | 862  |
| AL544231.3 | 362  | .....                                                                                                                                                 | 511  |
| DC631365.1 | 360  | .....TG.....G.....C.....G.....                                                                                                                        | 509  |
| DC636772.1 | 360  | .....G.TG.....G.....C.....G.....                                                                                                                      | 509  |
| AL541874.3 | 336  | .....                                                                                                                                                 | 485  |
| BU902298.1 | 375  | .....                                                                                                                                                 | 524  |
| BX438944.2 | 344  | .....                                                                                                                                                 | 493  |
| AL553114.3 | 467  | .....                                                                                                                                                 | 616  |
| AL576223.3 | 1001 | .....-.....-D.....-WR.....-.....A.....-V.....-.....W.....AAR.....                                                                                     | 857  |
| Query      | 602  | ACAAAGAAATCAGAGACATTAAACAGGCTCTACAGAGAGGAAGAGAGATCTGGCCAAAGACATAACCTCAGACACATCTGGAGATTTTCGGAAACGCTTTGCTTTCTCTTGCTAAGGGTGACCGATCTGAGGACTTTGGTGTGAATG   | 751  |
| BU508007.1 | 492  | .....                                                                                                                                                 | 641  |
| AL570428.3 | 861  | .....W.....                                                                                                                                           | 712  |
| AL544231.3 | 512  | .....                                                                                                                                                 | 661  |
| DC631365.1 | 510  | .....G.....                                                                                                                                           | 659  |
| DC636772.1 | 510  | .....                                                                                                                                                 | 659  |
| AL541874.3 | 486  | .....                                                                                                                                                 | 635  |
| BU902298.1 | 525  | .....                                                                                                                                                 | 674  |
| BX438944.2 | 494  | .....                                                                                                                                                 | 643  |
| AL553114.3 | 617  | .....                                                                                                                                                 | 766  |
| AL576223.3 | 856  | .....                                                                                                                                                 | 707  |
| Query      | 752  | AAGACTTGGCTGATTCAGATGCCAGGGCCTTGATGAAGCAGGAGAAAGGAGAAAGGGGACAGACGTAAACGTGTTCAATACCATCCTTACCACCAAGCTATCCACAACCTTCGAGAGTGTTTCAGAAATACACCAAGTACAGTAAGC   | 901  |
| BU508007.1 | 642  | .....                                                                                                                                                 | 791  |
| AL570428.3 | 711  | .....R.....N.....                                                                                                                                     | 562  |
| AL544231.3 | 662  | .....                                                                                                                                                 | 811  |
| DC631365.1 | 660  | .....G.....T.....C.....T.....                                                                                                                         | 809  |
| DC636772.1 | 660  | .....G.....T.....C.....T.....                                                                                                                         | 809  |
| AL541874.3 | 636  | .....                                                                                                                                                 | 785  |
| BU902298.1 | 675  | .....                                                                                                                                                 | 824  |
| BX438944.2 | 644  | .....                                                                                                                                                 | 793  |
| AL553114.3 | 767  | .....                                                                                                                                                 | 916  |
| AL576223.3 | 706  | .....                                                                                                                                                 | 557  |
| Query      | 902  | ATGACATGAACAAAGTTCTGGACCTGGAGTTGAAAGGTGACATTGAGAAATGCGCTCACAGCTATCGTGAAGTGCGCCAAGCAACACAGCTTTCTTTGCAGAGAAGCTTCATCAAGCCATGAAAGGTGTTGGAACCTGCCATAAGGCAT | 1051 |
| BU508007.1 | 792  | .....                                                                                                                                                 | 940  |
| AL570428.3 | 561  | .....A.....                                                                                                                                           | 412  |
| AL544231.3 | 812  | .....                                                                                                                                                 | 960  |
| DC631365.1 | 810  | .....T.....A.....G.....C.....                                                                                                                         | 959  |
| DC636772.1 | 810  | .....T.....A.....G.....C.....                                                                                                                         | 959  |
| AL541874.3 | 786  | .....                                                                                                                                                 | 935  |
| BU902298.1 | 825  | .....                                                                                                                                                 | 974  |
| BX438944.2 | 794  | .....A.....TG.....C.....                                                                                                                              | 943  |
| AL553114.3 | 917  | .....W.....-.....-.....-.....-.....-.....M.....                                                                                                       | 1035 |
| AL576223.3 | 556  | .....                                                                                                                                                 | 407  |
| Query      | 1052 | TGATCAGGATTATGGTTTCCCGTTCTGAAATTGACATGAATGATATCAAAGCATTCATCAGAAGATGTATGGTATCTCCCTTTGCCAAGCCATCCTGGATGAAACCAAGGAGATTATGAGAAAATCCTGGTGGCTCTTTGTGGAGGAA  | 1201 |
| BU508007.1 | 941  | .....G.....G.....C.....T.....G.....C.....GA.....T.....TA.....                                                                                         | 1093 |
| AL570428.3 | 411  | .....G.....A.....T.....C.....G.....                                                                                                                   | 262  |
| AL544231.3 | 961  | .....G.W.....WY.....WY.....R.....Y.....K.....K.....R.....                                                                                             | 1102 |
| DC631365.1 | 960  | .....A.....                                                                                                                                           | 1096 |
| DC636772.1 | 960  | .....G.....A.....GG.....                                                                                                                              | 1099 |
| AL541874.3 | 936  | .....G.....T.....W.....K.....M.....                                                                                                                   | 1029 |
| BU902298.1 | 975  | .....GA.....G.....T.....A.....C.....T.....A.....A.....G.....A.....C.....G.....C.....C.....T.....G.....A.....C.....G.....A.....                        | 1132 |
| BX438944.2 | 944  | .....D.....R.....Y.....W.....KD.....Y.....Y.....                                                                                                      | 1030 |
| AL576223.3 | 406  | .....A.....                                                                                                                                           | 257  |

Query 1202 ACTAAACATTCCCTTGATGGTCTCAAGCTATGATCAGAAGACTTTAATTATATATATTTTCATCCTATAAGCTAAATAGGAAGTTTCTTCAACAGGATTACAGTGTAGCTACCTACATGCTGAAAAATATAGCCTTTAAATCATTTTAT 1351  
BU508007.1 1094 .....C.....C..... 1123  
          \          \          \  
          A          T          AG  
AL570428.3 261 ..... 112  
DC631365.1 1097 .....A.....CA..G.....C.....C.....C.....C.....T.....C.....A..... 1216  
                                  \  
                                  A  
DC636772.1 1100 .....GA.....C.....G.....C.....G.....A.....T.....GG.....A.....A..... 1229  
                                  \  
                                  G  
BU902298.1 1133 .AA..... 1152  
          \          \          \  
          T          A          T  
AL576223.3 256 ..... 107  
Query 1352 ATTATAACTCTGTATAATAGAGATAAGTCCATTTTTTAAAAATGTTTTCCCAAACCATAAACCCTATACAAGTTGTCTAGTAAACAATACATGAGAAAGATGTCTATGT 1462  
AL570428.3 111 .....T..... 1  
DC636772.1 1230 .. 1231  
AL576223.3 106 .....B..... 1

Query= N2-26 [organism=Homo sapiens] anxal  
Length=988

| Sequences producing significant alignments: |                            |              |                              | Score<br>(Bits) | E<br>Value | Max<br>ident |
|---------------------------------------------|----------------------------|--------------|------------------------------|-----------------|------------|--------------|
| CA447733.1                                  | UI-H-EI0-ayf-a-16-0-UI.s1  | NCI_CGAP_EI0 | Homo sapiens...              | 1349            | 0.0        | 99%          |
| CA423056.1                                  | UI-H-FL0-bdk-f-10-0-UI.s1  | NCI_CGAP_FL0 | Homo sapiens...              | 1343            | 0.0        | 99%          |
| BQ776006.1                                  | UI-H-FH0-bck-h-18-0-UI.s1  | NCI_CGAP_FH0 | Homo sapiens...              | 1334            | 0.0        | 99%          |
| BU857810.1                                  | AGENCOURT_10474308         | NIH_MGC_107  | Homo sapiens cDNA cl...      | 1330            | 0.0        | 99%          |
| CN386790.1                                  | 17000599887650             | GRN_PRENEU   | Homo sapiens cDNA 5', mRN... | 1323            | 0.0        | 99%          |
| BQ228162.1                                  | AGENCOURT_7258587          | NIH_MGC_71   | Homo sapiens cDNA clon...    | 1321            | 0.0        | 99%          |
| BM981135.1                                  | UI-CF-EN1-adg-a-11-0-UI.s1 | UI-CF-EN1    | Homo sapiens c...            | 1317            | 0.0        | 99%          |
| CB306442.1                                  | UI-CF-EN1-aej-e-15-0-UI.s1 | UI-CF-EN1    | Homo sapiens c...            | 1306            | 0.0        | 99%          |
| CA418062.1                                  | UI-H-FH0-bcc-j-24-0-UI.s1  | NCI_CGAP_FH0 | Homo sapiens...              | 1306            | 0.0        | 99%          |
| CA418210.1                                  | UI-H-FH0-bcf-i-22-0-UI.s1  | NCI_CGAP_FH0 | Homo sapiens...              | 1303            | 0.0        | 99%          |

ALIGNMENTS

Query 249 GGTGTGAATGAAGACTTTGGCTGATTCAGATGCCAGGGCCTTGTATGAAGCAGGAGAAAGGAGAAAGGGGACAGACGTAAACGTGTTCATACCATCCTTACCACGAGAGCTATCCACAACTTCGCAGAGTGTTCAGAAATACACCAAG 398  
CA447733.1 765 ..... 616  
CA423056.1 767 ..... 618  
BQ776006.1 765 .....N..... 616  
                                  \  
                                  T  
BU857810.1 67 ..... 216  
CN386790.1 34 ..... 183  
BQ228162.1 220 ..... 369  
BM981135.1 760 .....N..... 616  
CB306442.1 744 .....N..... 616  
CA418062.1 744 .....N..... 616  
CA418210.1 740 ..... 613  
Query 399 TACAGTAAGCATGACATGAACAAAGTTCTGGACCTGGAGTTGAAAGGTGACATTGAGAAATGCCTCACAGCTATCGTGAAGTGCGCCACAAGCAACCAGCTTTCTTTGCAGAGAAGCTTCATCAAGCCATGAAAGGTGTTGGAACCTCGC 548  
CA447733.1 615 ..... 466  
CA423056.1 617 ..... 468  
BQ776006.1 615 ..... 466  
BU857810.1 217 ..... 366  
CN386790.1 184 ..... 333  
BQ228162.1 370 ..... 519  
BM981135.1 615 ..... 466  
CB306442.1 615 ..... 466  
CA418062.1 615 ..... 466  
CA418210.1 612 ..... 463  
Query 549 CATAAGGCATTGATCAGGATTATGGTTCCCGTCTGAAATTGACATGAATGATATCAAGACATTCTATCAGAAGATGTATGGTATCTCTTTGCCAAGCCATCCTGGATGAAACCAAGGAGATTATGAGAAAATCCTGGTGGCTCTTT 698  
CA447733.1 465 ..... 315  
                                  \  
                                  C  
CA423056.1 467 ..... 317  
                                  \  
                                  C



|            |     |                                                                                                                                                         |                 |     |
|------------|-----|---------------------------------------------------------------------------------------------------------------------------------------------------------|-----------------|-----|
| BQ776006.1 | 465 | .....                                                                                                                                                   | .....           | 315 |
|            |     |                                                                                                                                                         | \               |     |
|            |     |                                                                                                                                                         |                 |     |
|            |     |                                                                                                                                                         | C               |     |
| BU857810.1 | 367 | .....                                                                                                                                                   | .....           | 517 |
|            |     |                                                                                                                                                         | \               |     |
|            |     |                                                                                                                                                         |                 |     |
|            |     |                                                                                                                                                         | C               |     |
| CN386790.1 | 334 | .....                                                                                                                                                   | .....           | 484 |
|            |     |                                                                                                                                                         | \               |     |
|            |     |                                                                                                                                                         |                 |     |
|            |     |                                                                                                                                                         | C               |     |
| BQ228162.1 | 520 | .....                                                                                                                                                   | .....           | 670 |
|            |     |                                                                                                                                                         | \               |     |
|            |     |                                                                                                                                                         |                 |     |
|            |     |                                                                                                                                                         | C               |     |
| BM981135.1 | 465 | .....                                                                                                                                                   | .....           | 315 |
|            |     |                                                                                                                                                         | \               |     |
|            |     |                                                                                                                                                         |                 |     |
|            |     |                                                                                                                                                         | C               |     |
| CB306442.1 | 465 | .....                                                                                                                                                   | .....           | 315 |
|            |     |                                                                                                                                                         | \               |     |
|            |     |                                                                                                                                                         |                 |     |
|            |     |                                                                                                                                                         | C               |     |
| CA418062.1 | 465 | .....                                                                                                                                                   | .....           | 315 |
|            |     |                                                                                                                                                         | \               |     |
|            |     |                                                                                                                                                         |                 |     |
|            |     |                                                                                                                                                         | C               |     |
| CA418210.1 | 462 | .....                                                                                                                                                   | .....           | 312 |
|            |     |                                                                                                                                                         | \               |     |
|            |     |                                                                                                                                                         |                 |     |
|            |     |                                                                                                                                                         | C               |     |
| Query      | 699 | GTGGAGGAAACTAAACATTTCCTTGATGGTCTCAAGCTATGATCAGAAGACTTTAATTATATATTTTCATCCTATAAGCTTAAATAGGAAAGTTTCTTCAACAGGATTACAGTGTAGCTACCTACATGCTGAAAAATATAGCCTTTAAATC | 848             |     |
| CA447733.1 | 314 | .....                                                                                                                                                   | .....           | 164 |
|            |     |                                                                                                                                                         | \               |     |
|            |     |                                                                                                                                                         |                 |     |
|            |     |                                                                                                                                                         | C               |     |
| CA423056.1 | 316 | .....                                                                                                                                                   | .....           | 166 |
|            |     |                                                                                                                                                         | \               |     |
|            |     |                                                                                                                                                         |                 |     |
|            |     |                                                                                                                                                         | C               |     |
| BQ776006.1 | 314 | .....                                                                                                                                                   | .....           | 164 |
|            |     |                                                                                                                                                         | \               |     |
|            |     |                                                                                                                                                         |                 |     |
|            |     |                                                                                                                                                         | C               |     |
| BU857810.1 | 518 | .....                                                                                                                                                   | .....N.....N... | 668 |
|            |     |                                                                                                                                                         | \               |     |
|            |     |                                                                                                                                                         |                 |     |
|            |     |                                                                                                                                                         | C               |     |
| CN386790.1 | 485 | .....                                                                                                                                                   | .....           | 635 |
|            |     |                                                                                                                                                         | \               |     |
|            |     |                                                                                                                                                         |                 |     |
|            |     |                                                                                                                                                         | C               |     |
| BQ228162.1 | 671 | .....                                                                                                                                                   | .....           | 822 |
|            |     |                                                                                                                                                         | \               |     |
|            |     |                                                                                                                                                         |                 |     |
|            |     |                                                                                                                                                         | C               |     |
| BM981135.1 | 314 | .....                                                                                                                                                   | .....           | 164 |
|            |     |                                                                                                                                                         | \               |     |
|            |     |                                                                                                                                                         |                 |     |
|            |     |                                                                                                                                                         | C               |     |
| CB306442.1 | 314 | .....                                                                                                                                                   | .....           | 164 |
|            |     |                                                                                                                                                         | \               |     |
|            |     |                                                                                                                                                         |                 |     |
|            |     |                                                                                                                                                         | C               |     |
| CA418062.1 | 314 | .....                                                                                                                                                   | .....           | 164 |
|            |     |                                                                                                                                                         | \               |     |
|            |     |                                                                                                                                                         |                 |     |
|            |     |                                                                                                                                                         | C               |     |
| CA418210.1 | 311 | .....                                                                                                                                                   | .....           | 161 |
|            |     |                                                                                                                                                         | \               |     |
|            |     |                                                                                                                                                         |                 |     |
|            |     |                                                                                                                                                         | C               |     |
| Query      | 849 | ATTTTATATTATAACTCTGTATAATAGAGATAAGTCCATTTTAAAAATGTTTCCCAACCATAAAACCTATACAAGTTGTTCTAGTAACAATACATGAGAAAGATGCTCTATGTAGCTGAAAAATAAATGACGTCAC                | 988             |     |
| CA447733.1 | 163 | .....                                                                                                                                                   | .....           | 22  |
|            |     |                                                                                                                                                         | \               |     |
|            |     |                                                                                                                                                         |                 |     |
|            |     |                                                                                                                                                         | C               |     |
|            |     |                                                                                                                                                         | \               |     |
|            |     |                                                                                                                                                         |                 |     |
|            |     |                                                                                                                                                         | C               |     |
| CA423056.1 | 165 | .....                                                                                                                                                   | .....G.....     | 24  |
|            |     |                                                                                                                                                         | \               |     |
|            |     |                                                                                                                                                         | \               |     |

Query= N3-26 [organism=Homo sapiens] anxa1  
Length=1311

## ALIGNMENTS

|            |      |                                                                                                                                                          |     |
|------------|------|----------------------------------------------------------------------------------------------------------------------------------------------------------|-----|
| Query      | 306  | CAACAGATCAAAACGAGCATATCTCTCAGAAACAGGAAAGCCCTGGATGAAACACTGAAGAAGCCCTTACAGGTCACCTTGAGGAGGTGTTGTTTACGCTCTGCTAAAAACTCAGCGCAATTGATGCTGATGAACCTCGTGCTGCCATGA   | 455 |
| AL576223.3 | 1050 | .....-W.....-R.....-Y.....-.....CT.R.....-.....-D.....WR.....-A.....-V.....                                                                              | 911 |
| AL574991.3 | 986  | .....                                                                                                                                                    | 911 |
| AL576603.2 | 917  | .....                                                                                                                                                    | 914 |
| AL576340.3 | 1011 | .....G.....-Y.....-.....-K.....                                                                                                                          | 917 |
| Query      | 456  | AGGGCCTTGGAACTGATGAAGATACTCTAATTGAGATTTTGGCATCAAGAACTAACAAAGAAATCAGAGACATTAAACAGGGTCTACAGAGAGGAACTGAAGAGAGATCTGGCCAAAGACATAACCTCAGATCGGAGGCTAGTGCCATCTGA | 605 |
| AL576223.3 | 910  | .....W.AAR.....                                                                                                                                          | 781 |
| CN386790.1 | 28   | .....                                                                                                                                                    | 29  |
| AL574991.3 | 910  | .....                                                                                                                                                    | 781 |
| AL576603.2 | 913  | .....-WM.....                                                                                                                                            | 788 |
| AL576340.3 | 916  | .....-RW.....                                                                                                                                            | 792 |
| BE620646.1 | 748  | .....                                                                                                                                                    | 743 |
| BU857810.1 | 61   | .....                                                                                                                                                    | 62  |
| Query      | 606  | GTTTGGTGTGAATGAAGACTTGGCTGATTTCAGATGCCAGGGCCTTGTTATGAAGCAGGAGAAAGGAGAAAGGGGACAGACGCTAAACGTGTTCAATACCATCCTTACCACCAGAAGCTATCCACAACCTTCGCAAGTGTTCAGAAATACAC | 755 |
| BE614257.1 | 739  | .....                                                                                                                                                    | 591 |
| AL576223.3 | 719  | .....                                                                                                                                                    | 571 |
| CN386790.1 | 30   | C.....                                                                                                                                                   | 179 |
| CA447733.1 | 765  | .....                                                                                                                                                    | 620 |
| CA423056.1 | 767  | .....                                                                                                                                                    | 622 |
| AL574991.3 | 719  | .....                                                                                                                                                    | 571 |
| AL576603.2 | 726  | .....                                                                                                                                                    | 578 |
| AL576340.3 | 730  | .....                                                                                                                                                    | 582 |
| BE620646.1 | 742  | .....                                                                                                                                                    | 591 |



|                                                                                                                                            |      |                                                                                                                                                      |      |
|--------------------------------------------------------------------------------------------------------------------------------------------|------|------------------------------------------------------------------------------------------------------------------------------------------------------|------|
| BQ228162.1                                                                                                                                 | 201  | .....                                                                                                                                                | 350  |
| CA447733.1                                                                                                                                 | 765  | .....                                                                                                                                                | 635  |
| BE614257.1                                                                                                                                 | 755  | .....                                                                                                                                                | 606  |
| CA423056.1                                                                                                                                 | 767  | .....                                                                                                                                                | 637  |
| AL576603.2                                                                                                                                 | 742  | .....                                                                                                                                                | 593  |
| AL576340.3                                                                                                                                 | 746  | .....                                                                                                                                                | 597  |
| AL576223.3                                                                                                                                 | 735  | .....                                                                                                                                                | 586  |
| BQ776006.1                                                                                                                                 | 765  | .....                                                                                                                                                | 635  |
| <div> <div></div> <div> <div></div> <div>T</div> </div> </div>                                                                             |      |                                                                                                                                                      |      |
| Query                                                                                                                                      | 511  | GTTCAGAAATACACCAAGTACAGTAAGCATGACATGAACAAAGTTCTGGACCTGGAGTTGAAAGGTGACATTGAGAAATGCCTCACAGCTATCGTGAAGTGCGCCACAAGCAAACCGCTTCTTTGCAGAGAAGCTTCATCAAGCCAT  | 660  |
| BU857810.1                                                                                                                                 | 198  | .....                                                                                                                                                | 347  |
| CN386790.1                                                                                                                                 | 165  | .....                                                                                                                                                | 314  |
| BQ228162.1                                                                                                                                 | 351  | .....                                                                                                                                                | 500  |
| CA447733.1                                                                                                                                 | 634  | .....                                                                                                                                                | 485  |
| BE614257.1                                                                                                                                 | 605  | .....                                                                                                                                                | 456  |
| CA423056.1                                                                                                                                 | 636  | .....                                                                                                                                                | 487  |
| AL576603.2                                                                                                                                 | 592  | .....                                                                                                                                                | 443  |
| AL576340.3                                                                                                                                 | 596  | .....                                                                                                                                                | 447  |
| AL576223.3                                                                                                                                 | 585  | .....                                                                                                                                                | 436  |
| BQ776006.1                                                                                                                                 | 634  | ..N.....                                                                                                                                             | 485  |
| Query                                                                                                                                      | 661  | GAAAGGTGTTGGAACCTGCCATAAGGCATTGATCAGGATTATGGTTCCCGTCTGAAATTGACATGAATGATATCAAAGCATTCTATCAGAAGATGTATGGTATCTCCCTTTGCCAAGCCATCTGGATGAAACCAAAGGAGATTATGA  | 810  |
| BU857810.1                                                                                                                                 | 348  | .....                                                                                                                                                | 497  |
| CN386790.1                                                                                                                                 | 315  | .....                                                                                                                                                | 464  |
| BQ228162.1                                                                                                                                 | 501  | .....                                                                                                                                                | 650  |
| CA447733.1                                                                                                                                 | 484  | .....                                                                                                                                                | 335  |
| BE614257.1                                                                                                                                 | 455  | .....                                                                                                                                                | 306  |
| CA423056.1                                                                                                                                 | 486  | .....                                                                                                                                                | 337  |
| AL576603.2                                                                                                                                 | 442  | .....                                                                                                                                                | 293  |
| AL576340.3                                                                                                                                 | 446  | .....R.....R.....                                                                                                                                    | 297  |
| AL576223.3                                                                                                                                 | 435  | .....                                                                                                                                                | 286  |
| BQ776006.1                                                                                                                                 | 484  | .....                                                                                                                                                | 335  |
| Query                                                                                                                                      | 811  | GAAATCTCGGTGGCTCTTTGTGGAGGAACTAAACATTCCCTTGATGGTCTCAAGCTATGATCAGAAGACTTTAATTATATATTTTCATCCTATAAGCTTAAATAGGAAAGTTTCTTCAACAGGATTACAGTGTAGCTACCTACATGCT | 960  |
| BU857810.1                                                                                                                                 | 498  | .....N.....                                                                                                                                          | 647  |
| CN386790.1                                                                                                                                 | 465  | .....                                                                                                                                                | 614  |
| BQ228162.1                                                                                                                                 | 651  | .....                                                                                                                                                | 801  |
| <div> <div></div> <div> <div></div> <div>A</div> </div> </div>                                                                             |      |                                                                                                                                                      |      |
| CA447733.1                                                                                                                                 | 334  | .....                                                                                                                                                | 185  |
| BE614257.1                                                                                                                                 | 305  | .....                                                                                                                                                | 156  |
| CA423056.1                                                                                                                                 | 336  | .....                                                                                                                                                | 187  |
| AL576603.2                                                                                                                                 | 292  | .....                                                                                                                                                | 143  |
| AL576340.3                                                                                                                                 | 296  | .....                                                                                                                                                | 147  |
| AL576223.3                                                                                                                                 | 285  | .....                                                                                                                                                | 136  |
| BQ776006.1                                                                                                                                 | 334  | .....                                                                                                                                                | 185  |
| Query                                                                                                                                      | 961  | GAAAAATATAGCCTTTAAATCATTTTATATTATAACTCTGTATAATAGAGATAAGTCCATTTTAAAAATGTTTCCCAACCATAAACCCATATACAAGTTGTTCTAGTAACAATACATGAGAAAGATGTCATGTAGCTGAAAT       | 1110 |
| BU857810.1                                                                                                                                 | 648  | .....N.....                                                                                                                                          | 797  |
| CN386790.1                                                                                                                                 | 615  | .....G.....                                                                                                                                          | 764  |
| BQ228162.1                                                                                                                                 | 802  | .....G.....                                                                                                                                          | 954  |
| <div> <div></div> <div> <div></div> <div>G</div> </div> <div> <div></div> <div>G</div> </div> <div> <div></div> <div>A</div> </div> </div> |      |                                                                                                                                                      |      |
| CA447733.1                                                                                                                                 | 184  | .....                                                                                                                                                | 35   |
| BE614257.1                                                                                                                                 | 155  | .....T.A.....                                                                                                                                        | 6    |
| <div> <div></div> <div> <div></div> <div>T</div> </div> </div>                                                                             |      |                                                                                                                                                      |      |
| CA423056.1                                                                                                                                 | 186  | .....                                                                                                                                                | 37   |
| AL576603.2                                                                                                                                 | 142  | .....A.....                                                                                                                                          | 1    |
| <div> <div></div> <div> <div></div> <div>C</div> </div> </div>                                                                             |      |                                                                                                                                                      |      |
| AL576340.3                                                                                                                                 | 146  | .....                                                                                                                                                | 5    |
| <div> <div></div> <div> <div></div> <div>N</div> </div> </div>                                                                             |      |                                                                                                                                                      |      |
| AL576223.3                                                                                                                                 | 135  | .....B.....                                                                                                                                          | 1    |
| BQ776006.1                                                                                                                                 | 184  | .....                                                                                                                                                | 35   |
| Query                                                                                                                                      | 1111 | AAAATGACG 1119                                                                                                                                       |      |
| BU857810.1                                                                                                                                 | 798  | ..... 806                                                                                                                                            |      |
| CN386790.1                                                                                                                                 | 765  | .. 766                                                                                                                                               |      |
| BQ228162.1                                                                                                                                 | 955  | ..... 963                                                                                                                                            |      |
| CA447733.1                                                                                                                                 | 34   | ..... 26                                                                                                                                             |      |
| CA423056.1                                                                                                                                 | 36   | ..... 28                                                                                                                                             |      |
| BQ776006.1                                                                                                                                 | 34   | ..... 26                                                                                                                                             |      |

Query= N5-24 [organism=Homo sapiens] anxl

Length=1006

| Sequences producing significant alignments: |                            |                              | Score<br>(Bits) | E<br>Value | Max<br>ident |
|---------------------------------------------|----------------------------|------------------------------|-----------------|------------|--------------|
| CB306442.1                                  | UI-CF-EN1-aej-e-15-0-UI.s1 | UI-CF-EN1 Homo sapiens c...  | 1279            | 0.0        | 100%         |
| CA447733.1                                  | UI-H-EI0-ayf-a-16-0-UI.s1  | NCI_CGAP_EI0 Homo sapiens... | 1279            | 0.0        | 100%         |
| CA447223.1                                  | UI-H-EI0-ayd-b-19-0-UI.s1  | NCI_CGAP_EI0 Homo sapiens... | 1279            | 0.0        | 100%         |
| CA422748.1                                  | UI-H-FL0-bdr-g-09-0-UI.s1  | NCI_CGAP_FL0 Homo sapiens... | 1279            | 0.0        | 100%         |
| CA419844.1                                  | UI-H-FH0-bcm-d-16-0-UI.s1  | NCI_CGAP_FH0 Homo sapiens... | 1279            | 0.0        | 100%         |
| CA417462.1                                  | UI-H-FE0-bbw-c-13-0-UI.s1  | NCI_CGAP_FE0 Homo sapiens... | 1279            | 0.0        | 100%         |
| CA415613.1                                  | UI-H-EZ0-bay-p-10-0-UI.s1  | NCI_CGAP_Ch1 Homo sapiens... | 1279            | 0.0        | 100%         |
| CA414702.1                                  | UI-H-EZ0-bar-e-18-0-UI.s1  | NCI_CGAP_Ch1 Homo sapiens... | 1279            | 0.0        | 100%         |
| BU676462.1                                  | UI-CF-DU1-aai-b-16-0-UI.s1 | UI-CF-DU1 Homo sapiens c...  | 1279            | 0.0        | 100%         |
| BU633206.1                                  | UI-H-FL1-bgt-f-12-0-UI.s1  | NCI_CGAP_FL1 Homo sapiens... | 1279            | 0.0        | 100%         |

ALIGNMENTS

|            |     |                                                                                                                                                         |      |
|------------|-----|---------------------------------------------------------------------------------------------------------------------------------------------------------|------|
| Query      | 315 | AAAGGAGAAAGGGGACAGACGCTAAACGTGTTCAATACCATCCTTACCACCAGAAGCTATCCACAACCTCGCAGAGTGTTTCAGAAATACACCAAGTACAGTAAGCATGACATGAACAAAGTTCTGGACCTGGAGTTGAAAGGTGACATTG | 464  |
| CB306442.1 | 710 | .....                                                                                                                                                   | 561  |
| CA447733.1 | 710 | .....                                                                                                                                                   | 561  |
| CA447223.1 | 710 | .....                                                                                                                                                   | 561  |
| CA422748.1 | 712 | .....                                                                                                                                                   | 563  |
| CA419844.1 | 710 | .....                                                                                                                                                   | 561  |
| CA417462.1 | 707 | .....                                                                                                                                                   | 558  |
| CA415613.1 | 712 | .....                                                                                                                                                   | 563  |
| CA414702.1 | 712 | .....                                                                                                                                                   | 563  |
| BU676462.1 | 707 | .....                                                                                                                                                   | 558  |
| BU633206.1 | 710 | .....                                                                                                                                                   | 561  |
| Query      | 465 | AGAAATGCCTCACAGCTATCGTGAAGTGCGCCACAAGCAAACAGCTTTCTTTGCAGAGAAGCTTCATCAAGCCATGAAAGGTGTTGGAACCTGCCATAAGGCATTGATCAGGATTATGGTTTCCCGTTCTGAAATTGACATGAATGATA   | 614  |
| CB306442.1 | 560 | .....                                                                                                                                                   | 411  |
| CA447733.1 | 560 | .....                                                                                                                                                   | 411  |
| CA447223.1 | 560 | .....                                                                                                                                                   | 411  |
| CA422748.1 | 562 | .....                                                                                                                                                   | 413  |
| CA419844.1 | 560 | .....                                                                                                                                                   | 411  |
| CA417462.1 | 557 | .....                                                                                                                                                   | 408  |
| CA415613.1 | 562 | .....                                                                                                                                                   | 413  |
| CA414702.1 | 562 | .....                                                                                                                                                   | 413  |
| BU676462.1 | 557 | .....                                                                                                                                                   | 408  |
| BU633206.1 | 560 | .....                                                                                                                                                   | 411  |
| Query      | 615 | TCAAAGCATTTCTATCAGAGATGTATGGTATCTCCCTTTGCCAAGCCATCCTGGATGAACCAAAGGAGATTATGAGAAAATCCTGGTGGCTCTTTGTGGAGGAACTAAACATTCCCTGTATGGTCTCAGCTATGATCAGAAGACTTT     | 764  |
| CB306442.1 | 410 | .....                                                                                                                                                   | 261  |
| CA447733.1 | 410 | .....                                                                                                                                                   | 261  |
| CA447223.1 | 410 | .....                                                                                                                                                   | 261  |
| CA422748.1 | 412 | .....                                                                                                                                                   | 263  |
| CA419844.1 | 410 | .....                                                                                                                                                   | 261  |
| CA417462.1 | 407 | .....                                                                                                                                                   | 258  |
| CA415613.1 | 412 | .....                                                                                                                                                   | 263  |
| CA414702.1 | 412 | .....                                                                                                                                                   | 263  |
| BU676462.1 | 407 | .....                                                                                                                                                   | 258  |
| BU633206.1 | 410 | .....                                                                                                                                                   | 261  |
| Query      | 765 | AATTATATATTTTCATCCTATAAGCTTAAATAGGAAAGTTTCTTCAACAGGATTACAGTGTAGCTACCTACATGCTGAAAAATATAGCCTTTAAATCATTTTTATATTATAACTCTGTATAATAGAGATAAGTCCATTTTTTAAAAATGT  | 914  |
| CB306442.1 | 260 | .....                                                                                                                                                   | 111  |
| CA447733.1 | 260 | .....                                                                                                                                                   | 111  |
| CA447223.1 | 260 | .....                                                                                                                                                   | 111  |
| CA422748.1 | 262 | .....                                                                                                                                                   | 113  |
| CA419844.1 | 260 | .....                                                                                                                                                   | 111  |
| CA417462.1 | 257 | .....                                                                                                                                                   | 108  |
| CA415613.1 | 262 | .....                                                                                                                                                   | 113  |
| CA414702.1 | 262 | .....                                                                                                                                                   | 113  |
| BU676462.1 | 257 | .....                                                                                                                                                   | 108  |
| BU633206.1 | 260 | .....                                                                                                                                                   | 111  |
| Query      | 915 | TTTCCCCAAACCATAAAACCTTATACAAGTTGTTCTAGTAACAATACATGAGAAAGATGTCTATGTAGCTGAAAAATAAAATGACGTCACAAG                                                           | 1006 |
| CB306442.1 | 110 | .....                                                                                                                                                   | 19   |
| CA447733.1 | 110 | .....                                                                                                                                                   | 19   |
| CA447223.1 | 110 | .....                                                                                                                                                   | 19   |
| CA422748.1 | 112 | .....                                                                                                                                                   | 21   |
| CA419844.1 | 110 | .....                                                                                                                                                   | 19   |
| CA417462.1 | 107 | .....                                                                                                                                                   | 16   |
| CA415613.1 | 112 | .....                                                                                                                                                   | 21   |
| CA414702.1 | 112 | .....                                                                                                                                                   | 21   |
| BU676462.1 | 107 | .....                                                                                                                                                   | 16   |
| BU633206.1 | 110 | .....                                                                                                                                                   | 19   |

Query= N6-25 [organism=Homo sapiens] anxl

Length=1042

| Sequences producing significant alignments: |                    |                                               |      | Score<br>(Bits) | E<br>Value | Max<br>ident |
|---------------------------------------------|--------------------|-----------------------------------------------|------|-----------------|------------|--------------|
| AL576223.3                                  | AL576223           | Homo sapiens PLACENTA COT 25-NORMALIZED Ho... | 1363 | 0.0             | 100%       |              |
| AL574991.3                                  | AL574991           | Homo sapiens PLACENTA COT 25-NORMALIZED Ho... | 1360 | 0.0             | 99%        |              |
| AL576603.2                                  | AL576603           | Homo sapiens PLACENTA COT 25-NORMALIZED Ho... | 1360 | 0.0             | 100%       |              |
| BE614257.1                                  | 601504294T1        | NIH_MGC_71 Homo sapiens cDNA clone IMAG...    | 1360 | 0.0             | 100%       |              |
| AL576340.3                                  | AL576340           | Homo sapiens PLACENTA COT 25-NORMALIZED Ho... | 1354 | 0.0             | 99%        |              |
| BU857810.1                                  | AGENCOURT_10474308 | NIH_MGC_107 Homo sapiens cDNA cl...           | 1352 | 0.0             | 99%        |              |
| BQ228162.1                                  | AGENCOURT_7258587  | NIH_MGC_71 Homo sapiens cDNA clon...          | 1352 | 0.0             | 99%        |              |
| AL570884.3                                  | AL570884           | Homo sapiens PLACENTA COT 25-NORMALIZED Ho... | 1339 | 0.0             | 99%        |              |
| BU596129.1                                  | AGENCOURT_8906716  | NIH_MGC_142 Homo sapiens cDNA clon...         | 1339 | 0.0             | 99%        |              |
| BQ954100.1                                  | AGENCOURT_8869366  | NIH_MGC_71 Homo sapiens cDNA clon...          | 1339 | 0.0             | 99%        |              |

ALIGNMENTS

|            |     |                                                                                                                                                          |     |
|------------|-----|----------------------------------------------------------------------------------------------------------------------------------------------------------|-----|
| Query      | 298 | AACGCTTTGCTTTCTCTTGCTAAGGGTGACCGATCTGAGGACTTTGGTGTGAATGAAGACTTGGCTGATTGATGCCAGGGCCTTGATGAAGCAGGAGAAAGGAGAAAGGGGACAGACGTAAACGTGTTCAATACCATCCTTACCACC      | 447 |
| AL576223.3 | 761 | .....                                                                                                                                                    | 612 |
| AL574991.3 | 761 | .....                                                                                                                                                    | 612 |
| AL576603.2 | 768 | .....                                                                                                                                                    | 619 |
| BE614257.1 | 780 | .....                                                                                                                                                    | 632 |
| AL576340.3 | 772 | .....                                                                                                                                                    | 623 |
| BU857810.1 | 22  | .....                                                                                                                                                    | 171 |
| BQ228162.1 | 175 | .....                                                                                                                                                    | 324 |
| AL570884.3 | 768 | .....                                                                                                                                                    | 619 |
| BU596129.1 | 6   | .....                                                                                                                                                    | 155 |
| BQ954100.1 | 24  | .....                                                                                                                                                    | 173 |
| Query      | 448 | AGAAGCTATCCACAACCTTCGCAGAGTGTTCAGAAATACACCAAGTACAGTAAGCATGACATGAACAAAGTTCTGGACCTGGAGTTGAAAGGTGACATTGAGAAATGCCTCACAGCTATCGTGAAGTGCGCCACAAGCAACCAGCTTTC    | 597 |
| AL576223.3 | 611 | .....                                                                                                                                                    | 462 |
| AL574991.3 | 611 | .....                                                                                                                                                    | 462 |
| AL576603.2 | 618 | .....                                                                                                                                                    | 469 |
| BE614257.1 | 631 | .....                                                                                                                                                    | 482 |
| AL576340.3 | 622 | .....                                                                                                                                                    | 473 |
| BU857810.1 | 172 | .....                                                                                                                                                    | 321 |
| BQ228162.1 | 325 | .....                                                                                                                                                    | 474 |
| AL570884.3 | 618 | .....                                                                                                                                                    | 469 |
| BU596129.1 | 156 | .....                                                                                                                                                    | 305 |
| BQ954100.1 | 174 | .....                                                                                                                                                    | 323 |
| Query      | 598 | TTTGCAGAGAAGCTTCATCAAGCCATGAAAGGTGTTGGAACCTGCCATAAAGGCATTGATCAGGATTATGGTTTCCCGTTCTGAAATTGACATGAATGATATCAAAGCATTCTATCAGAAGATGTATGGTATCTCCTTTTGCCAAGCCATCC | 747 |
| AL576223.3 | 461 | .....                                                                                                                                                    | 311 |
| AL574991.3 | 461 | .....W...                                                                                                                                                | 311 |
| AL576603.2 | 468 | .....                                                                                                                                                    | 318 |
| BE614257.1 | 481 | .....                                                                                                                                                    | 331 |
| AL576340.3 | 472 | .....                                                                                                                                                    | 322 |
| BU857810.1 | 322 | .....                                                                                                                                                    | 472 |
| BQ228162.1 | 475 | .....                                                                                                                                                    | 625 |
| AL570884.3 | 468 | .....                                                                                                                                                    | 318 |
| BU596129.1 | 306 | .....                                                                                                                                                    | 456 |

```

BQ954100.1 324 ..... 474
                                     \
                                     C

Query      748 TGGATGAAACCAAGGAGATTATGAGAAAATCCTGGTGGCTCTTTGTGGAGGAACTAAACATTCCTTGATGGTCTCAAGCTATGATCAGAAGACTTTAATTATATATTTTCATCCTATAAGCTTAAATAGGAAAGTTCTTCAACAGG 897
AL576223.3 310 ..... 161
AL574991.3 310 ..... 161
AL576603.2 317 ..... 168
BE614257.1 330 ..... 181
AL576340.3 321 ..... 172
BU857810.1 473 ..... 622
BQ228162.1 626 ..... 776
                                     \
                                     A

AL570884.3 317 ..... 168
BU596129.1 457 ..... 606
BQ954100.1 475 ..... 624

Query      898 ATTACAGTGTAGCTACATGCTGAAAAATATAGCCTTTAAATCATTTTATATATAAAGCTGTATAATAGAGATAAGTCCATTTTTTAAAAATGTTTTCCCAACCAATAAACCCATATACAAGTTGTTCTAGTAACAATAC 1042
AL576223.3 160 ..... 15
                                     \
                                     A

AL574991.3 160 ..... 15
                                     \
                                     A

AL576603.2 167 ..... 26
                                     \
                                     A

BE614257.1 180 ..... 35
                                     \
                                     A

AL576340.3 171 ..... 25
                                     \
                                     A

BU857810.1 623 ..... 768
                                     \
                                     A
                                     \
                                     N
                                     \
                                     N

BQ228162.1 777 ..... 923
                                     \
                                     A
                                     \
                                     G

AL570884.3 167 ..... 21
                                     \
                                     A
                                     \
                                     G
                                     \
                                     N
                                     \
                                     N
                                     \
                                     W

BU596129.1 607 ..... 753
                                     \
                                     A
                                     \
                                     AC
                                     \
                                     C
                                     \
                                     G

BQ954100.1 625 ..... 771
                                     \
                                     A
                                     \
                                     G

```

Query= N7-12 [organism=Homo sapiens] anxl

Length=1094

| Sequences producing significant alignments:                       | Score<br>(Bits) | E<br>Value | Max<br>ident |
|-------------------------------------------------------------------|-----------------|------------|--------------|
| AL553114.3 AL553114 Homo sapiens PLACENTA COT 25-NORMALIZED Ho... | 1441            | 0.0        | 100%         |
| CX870542.1 HESC4_46 F03.g1 A037 NIH MGC 262 Homo sapiens cDNA ... | 1441            | 0.0        | 100%         |
| BQ953713.1 AGENCOURT_8786826 NIH_MGC_43 Homo sapiens cDNA clon... | 1432            | 0.0        | 100%         |
| BM458053.1 AGENCOURT_6411336 NIH_MGC_71 Homo sapiens cDNA clon... | 1430            | 0.0        | 100%         |
| AL544959.3 AL544959 Homo sapiens PLACENTA COT 25-NORMALIZED Ho... | 1426            | 0.0        | 100%         |
| AU117349.1 AU117349 HEMBA1 Homo sapiens cDNA clone HEMBA100120... | 1426            | 0.0        | 100%         |
| AL553679.3 AL553679 Homo sapiens PLACENTA COT 25-NORMALIZED Ho... | 1419            | 0.0        | 100%         |
| BQ962441.1 AGENCOURT_10056322 NIH_MGC_71 Homo sapiens cDNA clo... | 1419            | 0.0        | 100%         |
| BU902298.1 AGENCOURT_10127317 NIH_MGC_71 Homo sapiens cDNA clo... | 1417            | 0.0        | 100%         |
| EB387180.1 nbj26d10.y1 Human optic nerve, Unnormalized (nbj) H... | 1415            | 0.0        | 100%         |

ALIGNMENTS

|            |     |                                                                                                                                                |     |
|------------|-----|------------------------------------------------------------------------------------------------------------------------------------------------|-----|
| Query      | 1   | AGTGTGAATCTTCAGAGAAGATTCTCTTTAGTCTTTGCAAGAAGGTAGAGATAAAGACACTTTTCAAAATGGCAATGGTATCAGAATTCCTCAAGCAGGCCTGGTTATTGAAAATGAAGACAGGAATATGTTCAAACTGTGA | 150 |
| AL553114.3 | 107 | .....                                                                                                                                          | 256 |
| CX870542.1 | 29  | .....                                                                                                                                          | 178 |
| BQ953713.1 | 1   | .....                                                                                                                                          | 145 |
| BM458053.1 | 11  | .....                                                                                                                                          | 160 |
| AL544959.3 | 1   | .....                                                                                                                                          | 142 |
| AU117349.1 | 1   | .....                                                                                                                                          | 150 |
| AL553679.3 | 1   | .....                                                                                                                                          | 142 |
| BQ962441.1 | 1   | .....                                                                                                                                          | 138 |
| BU902298.1 | 24  | .....                                                                                                                                          | 164 |

\  
I  
N

|            |   |       |     |
|------------|---|-------|-----|
| EB387180.1 | 1 | ..... | 136 |
|------------|---|-------|-----|

|            |     |                                                                                                                                                     |     |
|------------|-----|-----------------------------------------------------------------------------------------------------------------------------------------------------|-----|
| Query      | 151 | AGTCATCCAAAGGTGGTCCCGGATCAGCGGTGAGCCCTATCTACCTTCAATCCATCCTCGGATGTCGCTGCCTTGCATAAGGCCATAATGGTTAAAGGTGTGGATGAAGCAACCATCTTGACATTCTAACTAAGCGAAACAATGCAC | 300 |
| AL553114.3 | 257 | .....                                                                                                                                               | 406 |
| CX870542.1 | 179 | .....                                                                                                                                               | 328 |
| BQ953713.1 | 146 | .....                                                                                                                                               | 295 |
| BM458053.1 | 161 | .....                                                                                                                                               | 310 |
| AL544959.3 | 143 | .....                                                                                                                                               | 292 |
| AU117349.1 | 151 | .....                                                                                                                                               | 300 |
| AL553679.3 | 143 | .....                                                                                                                                               | 292 |
| BQ962441.1 | 139 | .....                                                                                                                                               | 288 |
| BU902298.1 | 165 | .....                                                                                                                                               | 314 |
| EB387180.1 | 137 | .....                                                                                                                                               | 286 |

|            |     |                                                                                                                                                  |     |
|------------|-----|--------------------------------------------------------------------------------------------------------------------------------------------------|-----|
| Query      | 301 | AGCGTCAACGATCMAAGCAGCATATCTCCAGGAAACGGAAGCCCTGGATGAACACTGAAGAAAGCCCTTACAGGTCACCTTGAGGAGGTGTTTTAGCTCTGCTAAAACTCCAGCGCAATTTGATGCTGATGAACCTTCGTGCTG | 450 |
| AL553114.3 | 407 | .....                                                                                                                                            | 556 |
| CX870542.1 | 329 | .....                                                                                                                                            | 478 |
| BQ953713.1 | 296 | .....                                                                                                                                            | 445 |
| BM458053.1 | 311 | .....                                                                                                                                            | 460 |
| AL544959.3 | 293 | .....                                                                                                                                            | 442 |
| AU117349.1 | 301 | .....C.....                                                                                                                                      | 450 |
| AL553679.3 | 293 | .....-.....                                                                                                                                      | 441 |
| BQ962441.1 | 289 | .....                                                                                                                                            | 438 |
| BU902298.1 | 315 | .....                                                                                                                                            | 464 |
| EB387180.1 | 287 | .....                                                                                                                                            | 436 |

|            |     |                                                                                                                                                     |     |
|------------|-----|-----------------------------------------------------------------------------------------------------------------------------------------------------|-----|
| Query      | 451 | CCATGAAGGGCCTTGGAACTGATGAAGATACTTAATTGAGATTTTGGCATCAAGAACTAACAAAGAAATCAGAGACATTAAACGGGTCTACAGAGGAACTGAAGAGAGATCTGGCCAAAGACATAACCTCAGACACATCTGGAGATT | 600 |
| AL553114.3 | 557 | .....                                                                                                                                               | 706 |
| CX870542.1 | 479 | .....                                                                                                                                               | 628 |
| BQ953713.1 | 446 | .....                                                                                                                                               | 595 |
| BM458053.1 | 461 | .....                                                                                                                                               | 610 |
| AL544959.3 | 443 | .....                                                                                                                                               | 592 |
| AU117349.1 | 451 | .....                                                                                                                                               | 600 |
| AL553679.3 | 442 | .....                                                                                                                                               | 591 |
| BQ962441.1 | 439 | .....                                                                                                                                               | 588 |
| BU902298.1 | 465 | .....                                                                                                                                               | 614 |
| EB387180.1 | 437 | .....                                                                                                                                               | 586 |

|            |     |                                                                                                                                                          |     |
|------------|-----|----------------------------------------------------------------------------------------------------------------------------------------------------------|-----|
| Query      | 601 | TTCGGAACGCTTTTGCTTTCTTCTTAAGGGTGACCGATCTGAGGACTTTGGTGTGAATGAAGACTTTGGCTGATTTCAGATGCCAGGGCCTTGTTATGAAGCAGGAGAAAGGAGAAAGGGGACAGACGTAAACGTGTTCAATACCATCCTTA | 750 |
| AL553114.3 | 707 | .....                                                                                                                                                    | 856 |
| CX870542.1 | 629 | .....                                                                                                                                                    | 778 |
| BQ953713.1 | 596 | .....                                                                                                                                                    | 745 |
| BM458053.1 | 611 | .....T.....                                                                                                                                              | 760 |
| AL544959.3 | 593 | .....                                                                                                                                                    | 742 |
| AU117349.1 | 601 | .....N.....                                                                                                                                              | 750 |
| AL553679.3 | 592 | .....                                                                                                                                                    | 741 |
| BQ962441.1 | 589 | .....                                                                                                                                                    | 738 |
| BU902298.1 | 615 | .....                                                                                                                                                    | 764 |
| EB387180.1 | 587 | .....                                                                                                                                                    | 736 |

|            |     |                                |     |
|------------|-----|--------------------------------|-----|
| Query      | 751 | CCACCAGAAGCTATCCACNACTTCGCAGAG | 780 |
| AL553114.3 | 857 | .....                          | 886 |
| CX870542.1 | 779 | .....                          | 808 |
| BQ953713.1 | 746 | .....                          | 775 |
| BM458053.1 | 761 | .....                          | 791 |

\  
I  
C

|            |     |       |     |
|------------|-----|-------|-----|
| AL544959.3 | 743 | ..... | 772 |
| AU117349.1 | 751 | ..... | 777 |
| AL553679.3 | 742 | ..... | 771 |
| BQ962441.1 | 739 | ..... | 768 |
| BU902298.1 | 765 | ..... | 794 |
| EB387180.1 | 737 | ..... | 766 |

Query= N8-23 [organism=Homo sapiens] anx1

Length=1377



| Score<br>(Bits) | E<br>Value | Max<br>ident |
|-----------------|------------|--------------|
|-----------------|------------|--------------|

|      |     |     |
|------|-----|-----|
| 1820 | 0.0 | 96% |
| 1803 | 0.0 | 97% |
| 1796 | 0.0 | 96% |
| 1768 | 0.0 | 93% |
| 1744 | 0.0 | 92% |
| 1742 | 0.0 | 97% |
| 1736 | 0.0 | 95% |
| 1735 | 0.0 | 97% |
| 1722 | 0.0 | 96% |
| 1720 | 0.0 | 96% |

Query 1 AGTGTGAAATCTTCAGAGAAGAAATTCCTTTTAGTTCCTTGCAAGAGGCTAGAGATAAAGACACTTTTTCAAATAATGGCAATGGTATCAGAAATTCCTCAAGCAGGCCCTGGTTTATTGAAAATGAAGAGCAGGAATATGTTCAAACCTGTGA 150  
BU508007.1 1 ..... 131

AL544231.3 19 N 151  
DC631365.1 1 .....C.C. 149  
DC636772.1 1 .....C.C. 149  
AL541874.3 1 .....C.C. 125  
BU902298.1 24 ..... 164

BX438944.2 1 N 133

Query 151 AGTCATCCAAAGGTGGTCCCGGATCAGCGGTGAGCCCCATCTCTACCTTCAATCCATCTCGGATGTCGCTGCCTTGCATAAGGCCATAATGGTTAAAGGTGTGGATGAAGCAACCATCATTGACATTCTAAGCGAAACAATGCAC 300  
BU508007.1 132 ..... 281  
AL570428.3 1098 .....-T. ....- 1068  
AL544231.3 152 ..... 301  
DC631365.1 150 .A. .T. .A. .T. .C. 299  
DC636772.1 150 .A. .T. .A. .C. 299  
AL541874.3 126 ..... 275  
BU902298.1 165 ..... 314  
BX438944.2 134 ..... 283

Query 301 AGCGTCAACAGATCAAAGCAGCATATCTCCAGGAAACAGGAAAGCCCTGGATGAAACACTGAAGAAAGCCCTTACAGGTCACCTTGAGGAGGTTGTTTtagctctgctAAAAACTCCAGCGCAATTTGATGCTGATGAACTCGTGCTGC 450  
BU508007.1 282 ..... 432

AL570428.3 1067 ...T...-A.-...W.....GC...-Y..... 921

AL544231.3 302 ..... 452

DC631365.1 300 .....TG.....G..... 450

DC636772.1 300 .....G.TG.....G..... 450

AL541874.3 276 ..... 426

BU902298.1 315 ..... 465

BX438944.2 284 ..... 434

AL576223.3 1050 .....-W.....-R...-Y...-...CT.R.....-D...WR.....-A...-V..... 916  
AL570884.3 1059 .....T...T.....C.....W.....RS...W.....Y.M.....R...T...K.....YY..S.W.....C.....K...S. 923

M Y

|            |     |                                                                                                                                                                                                                                                                                                                                                                                                      |     |
|------------|-----|------------------------------------------------------------------------------------------------------------------------------------------------------------------------------------------------------------------------------------------------------------------------------------------------------------------------------------------------------------------------------------------------------|-----|
| Query      | 451 | CATGAAGGCCTTGGAAGTGAAGATACTCTAATTGAGATTTTGGCATCAAGAACTAACAAAGAANTCAGAGACATTAAACAGGGTCTACAGAGAGGAAGTGAAGAGAGATCTGGCCAAAGACATAACCTCAGACACATCTGGAGATTT                                                                                                                                                                                                                                                  | 600 |
| BU508007.1 | 433 | .....                                                                                                                                                                                                                                                                                                                                                                                                | 582 |
| AL570428.3 | 920 | .....M.....W.....                                                                                                                                                                                                                                                                                                                                                                                    | 771 |
| AL544231.3 | 453 | .....                                                                                                                                                                                                                                                                                                                                                                                                | 602 |
| DC631365.1 | 451 | .....C..G.....G.....                                                                                                                                                                                                                                                                                                                                                                                 | 600 |
| DC636772.1 | 451 | .....C..G.....                                                                                                                                                                                                                                                                                                                                                                                       | 600 |
| AL541874.3 | 427 | .....                                                                                                                                                                                                                                                                                                                                                                                                | 576 |
| BU902298.1 | 466 | .....                                                                                                                                                                                                                                                                                                                                                                                                | 615 |
| BX438944.2 | 435 | .....                                                                                                                                                                                                                                                                                                                                                                                                | 584 |
| AL576223.3 | 915 | .....W..AAR.....                                                                                                                                                                                                                                                                                                                                                                                     | 766 |
| AL570884.3 | 922 | .....                                                                                                                                                                                                                                                                                                                                                                                                | 773 |
| Query      | 601 | TCGGAACGCTTTGCTTTCTCTTGCTAAGGGTGACCGATCTGAGGACTTTGGTGTGAATGAAGACTTTGTGATTCAGATCAGGCTTGAAGCAGAGAAAGAGGGGACAGACGTAAACGTGTTCAATACCATCCTTACCACGAGGCTATCCA                                                                                                                                                                                                                                                | 750 |
| BU508007.1 | 583 | .....                                                                                                                                                                                                                                                                                                                                                                                                | 748 |
|            |     | <div style="display: flex; justify-content: space-around; align-items: center;"> <div style="text-align: center;"> \ <br/>GC </div> <div style="text-align: center;"> \ \ <br/>G  G  <br/>C C </div> <div style="text-align: center;"> \ \ \ <br/>T    <br/>TG  <br/>A </div> <div style="text-align: center;"> \ <br/>G </div> <div style="text-align: center;"> \ <br/>GAAAG </div> </div>         |     |
| AL570428.3 | 770 | .....R.....                                                                                                                                                                                                                                                                                                                                                                                          | 605 |
|            |     | <div style="display: flex; justify-content: space-around; align-items: center;"> <div style="text-align: center;"> \ <br/>GC </div> <div style="text-align: center;"> \ \ \ <br/>GC G C  <br/>TTG  <br/>A </div> <div style="text-align: center;"> \ <br/>G </div> <div style="text-align: center;"> \ \ \ <br/>G    <br/>A  <br/>AA </div> <div style="text-align: center;"> \ <br/>N </div> </div> |     |
| AL544231.3 | 603 | .....                                                                                                                                                                                                                                                                                                                                                                                                | 768 |
|            |     | <div style="display: flex; justify-content: space-around; align-items: center;"> <div style="text-align: center;"> \ <br/>GC </div> <div style="text-align: center;"> \ \ \ <br/>G  G  <br/>C C </div> <div style="text-align: center;"> \ \ \ <br/>T    <br/>TG  <br/>A </div> <div style="text-align: center;"> \ <br/>G </div> <div style="text-align: center;"> \ <br/>GAAAG </div> </div>       |     |
| DC631365.1 | 601 | .....G.....T.....C.....                                                                                                                                                                                                                                                                                                                                                                              | 766 |
|            |     | <div style="display: flex; justify-content: space-around; align-items: center;"> <div style="text-align: center;"> \ <br/>GC </div> <div style="text-align: center;"> \ \ \ <br/>G  G  <br/>C C </div> <div style="text-align: center;"> \ \ \ <br/>T    <br/>TG  <br/>A </div> <div style="text-align: center;"> \ <br/>G </div> <div style="text-align: center;"> \ <br/>GAAAG </div> </div>       |     |
| DC636772.1 | 601 | .....G.....T.....C.....                                                                                                                                                                                                                                                                                                                                                                              | 766 |
|            |     | <div style="display: flex; justify-content: space-around; align-items: center;"> <div style="text-align: center;"> \ <br/>GC </div> <div style="text-align: center;"> \ \ \ <br/>G  G  <br/>C C </div> <div style="text-align: center;"> \ \ \ <br/>T    <br/>TG  <br/>A </div> <div style="text-align: center;"> \ <br/>G </div> <div style="text-align: center;"> \ <br/>GAAAG </div> </div>       |     |
| AL541874.3 | 577 | .....                                                                                                                                                                                                                                                                                                                                                                                                | 742 |
|            |     | <div style="display: flex; justify-content: space-around; align-items: center;"> <div style="text-align: center;"> \ <br/>GC </div> <div style="text-align: center;"> \ \ \ <br/>G  G  <br/>C C </div> <div style="text-align: center;"> \ \ \ <br/>T    <br/>TG  <br/>A </div> <div style="text-align: center;"> \ <br/>G </div> <div style="text-align: center;"> \ <br/>GAAAG </div> </div>       |     |
| BU902298.1 | 616 | .....                                                                                                                                                                                                                                                                                                                                                                                                | 781 |
|            |     | <div style="display: flex; justify-content: space-around; align-items: center;"> <div style="text-align: center;"> \ <br/>GC </div> <div style="text-align: center;"> \ \ \ <br/>G  G  <br/>C C </div> <div style="text-align: center;"> \ \ \ <br/>T    <br/>TG  <br/>A </div> <div style="text-align: center;"> \ <br/>G </div> <div style="text-align: center;"> \ <br/>GAAAG </div> </div>       |     |
| BX438944.2 | 585 | .....                                                                                                                                                                                                                                                                                                                                                                                                | 750 |
|            |     | <div style="display: flex; justify-content: space-around; align-items: center;"> <div style="text-align: center;"> \ <br/>GC </div> <div style="text-align: center;"> \ \ \ <br/>G  G  <br/>C C </div> <div style="text-align: center;"> \ \ \ <br/>T    <br/>TG  <br/>A </div> <div style="text-align: center;"> \ <br/>G </div> <div style="text-align: center;"> \ <br/>GAAAG </div> </div>       |     |
| AL576223.3 | 765 | .....                                                                                                                                                                                                                                                                                                                                                                                                | 600 |
|            |     | <div style="display: flex; justify-content: space-around; align-items: center;"> <div style="text-align: center;"> \ <br/>GC </div> <div style="text-align: center;"> \ \ \ <br/>GC G C  <br/>  </div> <div style="text-align: center;"> \ <br/>G </div> <div style="text-align: center;"> \ \ \ <br/>G    <br/>  </div> </div>                                                                      |     |

|            |      |                                                                                                                                                         |     |         |    |         |      |
|------------|------|---------------------------------------------------------------------------------------------------------------------------------------------------------|-----|---------|----|---------|------|
|            |      |                                                                                                                                                         | TTG |         | A  |         |      |
|            |      |                                                                                                                                                         |     |         |    |         |      |
|            |      |                                                                                                                                                         | A   |         | AA |         |      |
|            |      |                                                                                                                                                         |     |         | G  |         |      |
| AL570884.3 | 772  | .....                                                                                                                                                   |     |         |    |         | 607  |
|            |      |                                                                                                                                                         | \   | \ \ \ \ | \  | \ \ \ \ |      |
|            |      |                                                                                                                                                         |     |         |    |         |      |
|            |      |                                                                                                                                                         | GC  | GC G C  | G  | G       |      |
|            |      |                                                                                                                                                         |     |         |    |         |      |
|            |      |                                                                                                                                                         | TTG |         | A  |         |      |
|            |      |                                                                                                                                                         |     |         |    |         |      |
|            |      |                                                                                                                                                         | A   |         | AA |         |      |
|            |      |                                                                                                                                                         |     |         | G  |         |      |
| Query      | 751  | CAACTTCGCAGAGTGTTCAGAAATACACCAAGTACAGTAAGCATGACATGAACAAAGTTCTGGACCTGGAGTTGAAAGGTGACATTGAGAAATGCCTCACAGCTATCGTGAAGTGCGCCACAAGCAAACAGCTTTCTTTGCAGAGAAG    |     |         |    |         | 900  |
| BU508007.1 | 749  | .....                                                                                                                                                   |     |         |    |         | 898  |
| AL570428.3 | 604  | .....A.....                                                                                                                                             |     |         |    |         | 455  |
| AL544231.3 | 769  | .....                                                                                                                                                   |     |         |    |         | 917  |
| DC631365.1 | 767  | ..T.....                                                                                                                                                |     |         |    |         | 916  |
| DC636772.1 | 767  | ..T.....                                                                                                                                                |     |         |    |         | 916  |
| AL541874.3 | 743  | .....                                                                                                                                                   |     |         |    |         | 892  |
| BU902298.1 | 782  | .....A.....TG.....C.....                                                                                                                                |     |         |    |         | 931  |
| BX438944.2 | 751  | .....                                                                                                                                                   |     |         |    |         | 900  |
| AL576223.3 | 599  | .....                                                                                                                                                   |     |         |    |         | 450  |
| AL570884.3 | 606  | .....                                                                                                                                                   |     |         |    |         | 457  |
| Query      | 901  | CTTCATCAAGCCATGAAAGGTGTGGAACCTGCCATAAGGCATTGATCAGGATTATGGTTCCCGTTCTGAAATTGACATGAATGATATCAAGCATTCATCNGAAGTGTATGGTATCTCCCTTTGCCAAGCCATCCTGGATGAAACC       |     |         |    |         | 1050 |
| BU508007.1 | 899  | .....-.....C.....-.....G.....G.....C..T..G.....                                                                                                         |     |         |    |         | 1049 |
|            |      |                                                                                                                                                         | \   |         | \  | \       |      |
|            |      |                                                                                                                                                         | G   |         | T  | C       |      |
| AL570428.3 | 454  | .....A.....                                                                                                                                             |     |         |    |         | 305  |
| AL544231.3 | 918  | .....G.W.....MWY.....MWY.....                                                                                                                           |     |         |    |         | 1063 |
| DC631365.1 | 917  | .....G.....C.....A.....-.....-.....-.....-.....                                                                                                         |     |         |    |         | 1061 |
|            |      |                                                                                                                                                         | \   |         |    |         |      |
|            |      |                                                                                                                                                         | G   |         |    |         |      |
| DC636772.1 | 917  | .....G.....C.....-.....A.....-.....-.....-.....-.....GG-                                                                                                |     |         |    |         | 1061 |
|            |      |                                                                                                                                                         | \   |         | \  | \       |      |
|            |      |                                                                                                                                                         | T   |         | G  | T       |      |
| AL541874.3 | 893  | .....                                                                                                                                                   |     |         |    |         | 1029 |
| BU902298.1 | 932  | .....C.....GA.....G.....T.....A.....C.....T.....A.....A.G.....A.....C.....G.....C.....C.....T.....                                                      |     |         |    |         | 1085 |
|            |      |                                                                                                                                                         |     |         | \  | \       |      |
|            |      |                                                                                                                                                         |     |         | G  | A       |      |
| BX438944.2 | 901  | .....K...R.....S.....D.....Y.....W...KD-.Y.....Y...                                                                                                     |     |         |    |         | 1030 |
|            |      |                                                                                                                                                         | \   |         |    |         |      |
|            |      |                                                                                                                                                         | A   |         |    |         |      |
| AL576223.3 | 449  | .....                                                                                                                                                   |     |         |    |         | 300  |
| AL570884.3 | 456  | .....                                                                                                                                                   |     |         |    |         | 307  |
| Query      | 1051 | AAAGGAGATTATGAGAAATCCTGGTGGCTCTTTGTGGAGGAACTAAACATTCCCTTGATGGTCTCAAGCTATGATCAGAAGACTTTAATTATATATTTTCATCCTATAAGCTTAAATAGGAAAGTTTCTTCAACAGGATTACAGTGTA    |     |         |    |         | 1200 |
| BU508007.1 | 1050 | C...GA...T..TA.....C.....                                                                                                                               |     |         |    |         | 1123 |
|            |      |                                                                                                                                                         | \   | \       | \  | \       |      |
|            |      |                                                                                                                                                         | G   | A       | T  | AG      |      |
| AL570428.3 | 304  | .....                                                                                                                                                   |     |         |    |         | 155  |
| AL544231.3 | 1064 | ....R.....Y.K.....K...R....                                                                                                                             |     |         |    |         | 1102 |
| DC631365.1 | 1062 | ..-.....-.....-.....A.....-.....CA...G...-...C...-...C...-...-...C...-..                                                                                |     |         |    |         | 1185 |
|            |      |                                                                                                                                                         | \   |         |    |         |      |
|            |      |                                                                                                                                                         | A   |         |    |         |      |
| DC636772.1 | 1062 | ..-.....-.....-.....GA.....C.....-.....G.....-.....C.....-.....G.....-..                                                                                |     |         |    |         | 1188 |
|            |      |                                                                                                                                                         | \   | \       |    |         |      |
|            |      |                                                                                                                                                         | C   | G       |    |         |      |
| BU902298.1 | 1086 | ..G...A.....A.....C...G.....A...AA.....                                                                                                                 |     |         |    |         | 1152 |
|            |      |                                                                                                                                                         | \   | \       | \  | \       |      |
|            |      |                                                                                                                                                         | G   | G       | G  | T A T   |      |
|            |      |                                                                                                                                                         |     | C       |    |         |      |
| AL576223.3 | 299  | .....                                                                                                                                                   |     |         |    |         | 150  |
| AL570884.3 | 306  | .....                                                                                                                                                   |     |         |    |         | 157  |
| Query      | 1201 | GCTACCTACATGCTGAAAAATATAGCCTTTAAATCATTTTTATATTATAACTCTGTATAATAGAGATAAGTCCATTTTTTAAAAATGTTTTCCCAAAACCATAAAACCCATATACAAGTTGTTCTAGTAACAATACATGAGAAAGATGTCT |     |         |    |         | 1350 |
| AL570428.3 | 154  | .....T.....                                                                                                                                             |     |         |    |         | 5    |
| DC631365.1 | 1186 | .....T.....C.....-.....A.....                                                                                                                           |     |         |    |         | 1216 |

DC636772.1 1189 .A.-...T-...T..GG.-...A...A..... 1231

AL576223.3 149 .....B..... 1

AL570884.3 156 .....RW..V.....N...N...W...A. 5

Query 1351 ATGT 1354

AL570428.3 4 .... 1

AL570884.3 4 .... 1

Query= N9-8 [organism=Homo sapiens] anxa1

Length=1237

| Sequences producing significant alignments: |                                                        | Score<br>(Bits) | E<br>Value | Max<br>ident |
|---------------------------------------------|--------------------------------------------------------|-----------------|------------|--------------|
| BQ228162.1                                  | AGENCOURT_7258587 NIH MGC_71 Homo sapiens cDNA clon... | 1541            | 0.0        | 99%          |
| AL576603.2                                  | AL576603 Homo sapiens PLACENTA COT 25-NORMALIZED Ho... | 1517            | 0.0        | 100%         |
| AL576340.3                                  | AL576340 Homo sapiens PLACENTA COT 25-NORMALIZED Ho... | 1515            | 0.0        | 100%         |
| AL576223.3                                  | AL576223 Homo sapiens PLACENTA COT 25-NORMALIZED Ho... | 1513            | 0.0        | 100%         |
| AL574991.3                                  | AL574991 Homo sapiens PLACENTA COT 25-NORMALIZED Ho... | 1509            | 0.0        | 100%         |
| BM555842.1                                  | AGENCOURT_6544353 NIH MGC_88 Homo sapiens cDNA clon... | 1504            | 0.0        | 99%          |
| AL570428.3                                  | AL570428 Homo sapiens PLACENTA COT 25-NORMALIZED Ho... | 1496            | 0.0        | 99%          |
| AL570884.3                                  | AL570884 Homo sapiens PLACENTA COT 25-NORMALIZED Ho... | 1489            | 0.0        | 99%          |
| BE614257.1                                  | 601504294T1 NIH_MGC_71 Homo sapiens cDNA clone IMAG... | 1487            | 0.0        | 98%          |
| AL575425.3                                  | AL575425 Homo sapiens PLACENTA COT 25-NORMALIZED Ho... | 1480            | 0.0        | 99%          |

# ALIGNMENTS

|            |     |                                                                                                                                                       |     |
|------------|-----|-------------------------------------------------------------------------------------------------------------------------------------------------------|-----|
| Query      | 376 | ACAGGTCACCTTGAGGAGGAAGTGAAGAGAGATCTGGCCAAAGACATAACCTCAGACACATCTGGAGATTTTCGGAAACGCTTTGCTTCTCTGCTAAGGGTGACCGATCTGAGGACTTTGGTGTGAATGAAGACTTGGCTGATTCAGAT | 525 |
| BQ228162.1 | 115 | .....                                                                                                                                                 | 249 |
| AL576603.2 | 828 | .....                                                                                                                                                 | 694 |
| AL576340.3 | 832 | .....                                                                                                                                                 | 698 |
| AL576223.3 | 821 | .....                                                                                                                                                 | 687 |
| AL574991.3 | 821 | .....                                                                                                                                                 | 687 |
| BM555842.1 | 74  | .....                                                                                                                                                 | 208 |
| AL570428.3 | 826 | .....                                                                                                                                                 | 692 |
| AL570884.3 | 828 | .....R.....                                                                                                                                           | 694 |
| BE614257.1 | 854 | .....-A..-...A.T.....A.....C.....-.....                                                                                                               | 707 |
| AL575425.3 | 839 | .....R.....A.....G.....R.....B.....S.....                                                                                                             | 705 |
| Query      | 526 | GCCAGGCGCTTGTATGAAGCAGGAGAAAGGAGAAAGGGGACAGACGTAAACGTGTTCAATACCATCCTTACCACCAAGAGCTATCCAACTTCGACAGAGTGTTTCAGAAATACACCAAGTACAGTAAGCATGACATGAACAAAGTTCTG | 675 |
| BQ228162.1 | 250 | .....                                                                                                                                                 | 399 |
| AL576603.2 | 693 | .....                                                                                                                                                 | 544 |
| AL576340.3 | 697 | .....                                                                                                                                                 | 548 |
| AL576223.3 | 686 | .....                                                                                                                                                 | 537 |
| AL574991.3 | 686 | .....                                                                                                                                                 | 537 |
| BM555842.1 | 209 | .....                                                                                                                                                 | 358 |
| AL570428.3 | 691 | .....N.....A.....                                                                                                                                     | 542 |
| AL570884.3 | 693 | .....                                                                                                                                                 | 544 |
| BE614257.1 | 706 | .....T.....N.....                                                                                                                                     | 557 |
| AL575425.3 | 704 | .....T.....N.....                                                                                                                                     | 555 |
| Query      | 676 | GACCTGAGATTGAAAGGTGACATTGAGAAATGCCTCACAGCTATCGTGAAGTGGCCACAAGCAAACGAGCTTTCTTTGCGAGAAGCTTCATCAAGCCATGAAAGGTGTGGAACTGCCATAAGGCATTGATCAGGATTATGGTTCC     | 825 |
| BQ228162.1 | 400 | .....                                                                                                                                                 | 549 |
| AL576603.2 | 543 | .....                                                                                                                                                 | 394 |
| AL576340.3 | 547 | .....                                                                                                                                                 | 398 |
| AL576223.3 | 536 | .....                                                                                                                                                 | 387 |
| AL574991.3 | 536 | .....                                                                                                                                                 | 387 |
| BM555842.1 | 359 | .....                                                                                                                                                 | 508 |
| AL570428.3 | 541 | .....                                                                                                                                                 | 392 |
| AL570884.3 | 543 | .....                                                                                                                                                 | 394 |
| BE614257.1 | 556 | .....                                                                                                                                                 | 407 |
| AL575425.3 | 554 | .....N.....                                                                                                                                           | 405 |
| Query      | 826 | CGTTCTGAAATTGACATGAATGATATCAAAGCATTCATCAGAAGATGTATGGTATCTCCCTTTGCCAAGCCATCCTGGATGAAACCAAGAGAGATTATGAGAAAATCCTGGTGGCTCTTTGTGGGAGAACTAAACATTCCTTTGATGG  | 975 |
| BQ228162.1 | 550 | .....                                                                                                                                                 | 699 |
| AL576603.2 | 393 | .....R.....R.....                                                                                                                                     | 244 |
| AL576340.3 | 397 | .....                                                                                                                                                 | 248 |
| AL576223.3 | 386 | .....                                                                                                                                                 | 237 |

|            |     |                   |     |
|------------|-----|-------------------|-----|
| AL574991.3 | 386 | .....W.....       | 237 |
| BM555842.1 | 509 | .....             | 658 |
| AL570428.3 | 391 | .....A.....T..... | 242 |
| AL570884.3 | 393 | .....             | 244 |
| BE614257.1 | 406 | .....             | 257 |
| AL575425.3 | 404 | .....             | 255 |

|            |     |                                                                                                                                                       |      |
|------------|-----|-------------------------------------------------------------------------------------------------------------------------------------------------------|------|
| Query      | 976 | TCTCAAGCTATGATCAGAAGACTTTAATTATATATTTTCATCCTATAAGCTTAAATAGGAAAGTTTCTTCAACAGGATTACAGTGTAGCTACCTACATGCTGAAAAATATAGCCTTTAAATCATTTTATATTATAACTCTGTATAATAG | 1125 |
| BQ228162.1 | 700 | .....                                                                                                                                                 | 850  |

|            |     |                 |     |
|------------|-----|-----------------|-----|
|            |     | .....<br>A..... |     |
| AL576603.2 | 243 | .....           | 94  |
| AL576340.3 | 247 | .....           | 98  |
| AL576223.3 | 236 | .....           | 87  |
| AL574991.3 | 236 | .....Y.....     | 87  |
| BM555842.1 | 659 | .....           | 808 |
| AL570428.3 | 241 | .....T.....     | 92  |
| AL570884.3 | 243 | .....           | 94  |
| BE614257.1 | 256 | .....           | 107 |
| AL575425.3 | 254 | .....N.....     | 105 |

|            |      |                                                                                                              |      |
|------------|------|--------------------------------------------------------------------------------------------------------------|------|
| Query      | 1126 | AGATAAGTCCATTTTTAAAAATGTTTTCCCAACCATAAAACCCCTATACAAGTTGTCTAGTAACAATACATGAGAAAGATGCTATGTAGCTGAAAAATAAATGACGTC | 1237 |
| BQ228162.1 | 851  | .....G.....                                                                                                  | 965  |

|            |     |                                                                 |     |
|------------|-----|-----------------------------------------------------------------|-----|
|            |     | .....<br>G.....A.....<br>G.....G.....A.....                     |     |
| AL576603.2 | 93  | .....                                                           | 1   |
|            |     | .....<br>C.....                                                 |     |
| AL576340.3 | 97  | .....                                                           | 5   |
|            |     | .....<br>N.....                                                 |     |
| AL576223.3 | 86  | .....B.....                                                     | 1   |
| AL574991.3 | 86  | .....                                                           | 1   |
| BM555842.1 | 809 | .....G.....                                                     | 922 |
|            |     | .....<br>A.....C.....C.....N.....C.....N.....A.....C.....G..... |     |
| AL570428.3 | 91  | .....                                                           | 1   |
| AL570884.3 | 93  | .....RW.....V.....N.....N.....W.....A.....                      | 1   |
|            |     | .....<br>N.....N.....                                           |     |
| BE614257.1 | 106 | .....T.A=.....                                                  | 6   |
|            |     | .....<br>T.....                                                 |     |
| AL575425.3 | 104 | .....N.....G.....                                               | 17  |

Query= N10-2 [organism=Homo sapiens] anxal

Length=927

| Sequences producing significant alignments: |                                                        | Score<br>(Bits) | E<br>Value | Max<br>ident |
|---------------------------------------------|--------------------------------------------------------|-----------------|------------|--------------|
| BQ228162.1                                  | AGENCOURT_7258587 NIH_MGC_71 Homo sapiens cDNA clon... | 1594            | 0.0        | 99%          |
| AL576603.2                                  | AL576603 Homo sapiens PLACENTA COT 25-NORMALIZED Ho... | 1576            | 0.0        | 100%         |
| AL576340.3                                  | AL576340 Homo sapiens PLACENTA COT 25-NORMALIZED Ho... | 1574            | 0.0        | 100%         |
| AL576223.3                                  | AL576223 Homo sapiens PLACENTA COT 25-NORMALIZED Ho... | 1572            | 0.0        | 100%         |
| AL574991.3                                  | AL574991 Homo sapiens PLACENTA COT 25-NORMALIZED Ho... | 1568            | 0.0        | 100%         |
| BM555842.1                                  | AGENCOURT_6544353 NIH_MGC_88 Homo sapiens cDNA clon... | 1568            | 0.0        | 99%          |
| AL570428.3                                  | AL570428 Homo sapiens PLACENTA COT 25-NORMALIZED Ho... | 1552            | 0.0        | 99%          |
| AL570884.3                                  | AL570884 Homo sapiens PLACENTA COT 25-NORMALIZED Ho... | 1548            | 0.0        | 99%          |
| AL575425.3                                  | AL575425 Homo sapiens PLACENTA COT 25-NORMALIZED Ho... | 1535            | 0.0        | 99%          |
| BE614257.1                                  | 601504294T1 NIH_MGC_71 Homo sapiens cDNA clone IMAG... | 1528            | 0.0        | 99%          |

ALIGNMENTS

|            |     |                                                                                                                                                       |     |
|------------|-----|-------------------------------------------------------------------------------------------------------------------------------------------------------|-----|
| Query      | 43  | AAGAAATCAGAGACATTAAACAGGGTCTACAGAGAGGAACTGAAGAGAGATCTGCCAAAGACATAACCTCAGACACATCTGGAGATTTTCGGAACGCTTTGCTTTCTTGTCTAAGGGTGACCGATCTGAGGACTTTGGTGTGAATGAAG | 192 |
| BQ228162.1 | 83  | .....                                                                                                                                                 | 232 |
| AL576603.2 | 860 | .....                                                                                                                                                 | 711 |
| AL576340.3 | 864 | .....                                                                                                                                                 | 715 |
| AL576223.3 | 853 | .....                                                                                                                                                 | 704 |
| AL574991.3 | 853 | .....                                                                                                                                                 | 704 |
| BM555842.1 | 42  | .....                                                                                                                                                 | 191 |
| AL570428.3 | 858 | .....W.....                                                                                                                                           | 709 |
| AL570884.3 | 860 | .....                                                                                                                                                 | 711 |

|            |            |                                                                                                                                                           |       |       |   |   |       |   |     |
|------------|------------|-----------------------------------------------------------------------------------------------------------------------------------------------------------|-------|-------|---|---|-------|---|-----|
|            | AL575425.3 | 871                                                                                                                                                       | .R.   | R.    | A | C | R.    | B | 722 |
|            | BE614257.1 | 871                                                                                                                                                       | -     | A.T   | A | - | -     | - | 724 |
|            |            |                                                                                                                                                           |       | <br>A |   |   | <br>G |   |     |
| Query      | 193        | ACTTGGCTGATTACAGATGCCAGGCCTTTGTATGAAGCAGGAGAAAGGGGACAGACGTAACGTGTCAATACCATCCTTACCACCAGAAGCTATCCACAAC TTCGAGAGTGTTTCAGAAAATACCCAAGTACAGTAAGCATG            |       |       |   |   |       |   | 342 |
| BQ228162.1 | 233        | .....                                                                                                                                                     |       |       |   |   |       |   | 382 |
| AL576603.2 | 710        | .....                                                                                                                                                     |       |       |   |   |       |   | 561 |
| AL576340.3 | 714        | .....                                                                                                                                                     |       |       |   |   |       |   | 565 |
| AL576223.3 | 703        | .....                                                                                                                                                     |       |       |   |   |       |   | 554 |
| AL574991.3 | 703        | .....                                                                                                                                                     |       |       |   |   |       |   | 554 |
| BM555842.1 | 192        | .....                                                                                                                                                     |       |       |   |   |       |   | 341 |
| AL570428.3 | 708        | .....N.....                                                                                                                                               |       |       |   |   |       |   | 559 |
| AL570884.3 | 710        | .....A.....                                                                                                                                               |       |       |   |   |       |   | 561 |
| AL575425.3 | 721        | .....S.....T.....                                                                                                                                         |       |       |   |   |       | N | 572 |
| BE614257.1 | 723        | .....                                                                                                                                                     |       |       |   |   |       |   | 574 |
| Query      | 343        | ACATGAACAAAGTTCTGGACCTGGAGTTGAAAGGTGACATTGAGAAATGCCTCACAGCTATCGTGAAGTGC GCACAAAGCAAC CAGCTTTCTTTG CAGAGAAGCTTCATCAAGCCATGAAAGGTTGTGGAAC TCGCCATAAGGCATTGA |       |       |   |   |       |   | 492 |
| BQ228162.1 | 383        | .....                                                                                                                                                     |       |       |   |   |       |   | 532 |
| AL576603.2 | 560        | .....                                                                                                                                                     |       |       |   |   |       |   | 411 |
| AL576340.3 | 564        | .....                                                                                                                                                     |       |       |   |   |       |   | 415 |
| AL576223.3 | 553        | .....                                                                                                                                                     |       |       |   |   |       |   | 404 |
| AL574991.3 | 553        | .....                                                                                                                                                     |       |       |   |   |       |   | 404 |
| BM555842.1 | 342        | .....                                                                                                                                                     |       |       |   |   |       |   | 491 |
| AL570428.3 | 558        | .....                                                                                                                                                     |       |       |   |   |       |   | 409 |
| AL570884.3 | 560        | .....                                                                                                                                                     |       |       |   |   |       |   | 411 |
| AL575425.3 | 571        | .....N.....                                                                                                                                               |       |       |   |   |       |   | 422 |
| BE614257.1 | 573        | .....                                                                                                                                                     |       |       |   |   |       |   | 424 |
| Query      | 493        | TCAGGATTATGTTTTCCCGTTCTGAAATTGACATGAATGATATCAAAGCATTCTATCAGAAGATGTATGGTATCTCCCTTTGCCAAGCCATCCTGGATGAAACCAAAGGAGATTATGAGAAAACTCCTGGTGGCTCTTTGTGGAGGAACT    |       |       |   |   |       |   | 642 |
| BQ228162.1 | 533        | .....                                                                                                                                                     |       |       |   |   |       |   | 682 |
| AL576603.2 | 410        | .....                                                                                                                                                     |       |       |   |   |       |   | 261 |
| AL576340.3 | 414        | .....R.....R.....                                                                                                                                         |       |       |   |   |       |   | 265 |
| AL576223.3 | 403        | .....W.....                                                                                                                                               |       |       |   |   |       |   | 254 |
| AL574991.3 | 403        | .....                                                                                                                                                     |       |       |   |   |       |   | 254 |
| BM555842.1 | 492        | .....A.....T.....                                                                                                                                         |       |       |   |   |       |   | 641 |
| AL570428.3 | 402        | .....                                                                                                                                                     |       |       |   |   |       |   | 259 |
| AL570884.3 | 410        | .....                                                                                                                                                     |       |       |   |   |       |   | 261 |
| AL575425.3 | 421        | .....                                                                                                                                                     |       |       |   |   |       |   | 272 |
| BE614257.1 | 423        | .....                                                                                                                                                     |       |       |   |   |       |   | 274 |
| Query      | 643        | AAACATTCCTTGTATGGTCTCAAGCTATGATCAGAAGACTTTAATTATATATTTTCATCCTATAAGCTTAAATAGGAAAGTTCTTCAACAGGATTACAGTGTAGCTACCTACATGCTGAAAAATATAGCCTTTAAATCATTTTTATATT     |       |       |   |   |       |   | 792 |
| BQ228162.1 | 683        | .....                                                                                                                                                     |       |       |   |   |       |   | 833 |
|            |            |                                                                                                                                                           |       | <br>A |   |   |       |   |     |
| AL576603.2 | 260        | .....                                                                                                                                                     |       |       |   |   |       |   | 111 |
| AL576340.3 | 264        | .....                                                                                                                                                     |       |       |   |   |       |   | 115 |
| AL576223.3 | 253        | .....Y.....                                                                                                                                               |       |       |   |   |       |   | 104 |
| AL574991.3 | 253        | .....                                                                                                                                                     |       |       |   |   |       |   | 104 |
| BM555842.1 | 642        | .....                                                                                                                                                     |       |       |   |   |       |   | 791 |
| AL570428.3 | 258        | .....                                                                                                                                                     |       |       |   |   |       |   | 109 |
| AL570884.3 | 260        | .....                                                                                                                                                     |       |       |   |   |       |   | 111 |
| AL575425.3 | 271        | .....N.....                                                                                                                                               |       |       |   |   |       |   | 122 |
| BE614257.1 | 273        | .....                                                                                                                                                     |       |       |   |   |       |   | 124 |
| Query      | 793        | ATAACTCTGTATAATAGAGATAAGTCCATTTTAAAAATGTTTTCCCCAACCATAAACCCTATACAAGTGTGTTCTAGTAACAATACATGAGAAAGATGTCTATGTAGCTGAAAAATAAAATGACGTC                           |       |       |   |   |       |   | 922 |
| BQ228162.1 | 834        | .....G.....AT.....                                                                                                                                        |       |       |   |   |       |   | 965 |
|            |            |                                                                                                                                                           |       | <br>G |   |   | <br>G |   |     |
| AL576603.2 | 110        | .....A.....                                                                                                                                               |       |       |   |   |       |   | 1   |
|            |            |                                                                                                                                                           |       | <br>C |   |   |       |   |     |
| AL576340.3 | 114        | .....N.....                                                                                                                                               |       |       |   |   |       |   | 5   |
|            |            |                                                                                                                                                           |       | <br>B |   |   |       |   |     |
| AL576223.3 | 103        | .....                                                                                                                                                     |       |       |   |   |       |   | 1   |
| AL574991.3 | 103        | .....                                                                                                                                                     |       |       |   |   |       |   | 1   |
| BM555842.1 | 792        | .....G.....                                                                                                                                               |       |       |   |   |       |   | 925 |
|            |            |                                                                                                                                                           | <br>A | <br>C |   |   |       |   |     |

BE614257.1 123 .....T.A-.....  
|  
T

6

Query= N11-16 [organism=Homo sapiens] anxa1  
Length=1930

| Sequences producing significant alignments: |                                                        | Score<br>(Bits) | E<br>Value | Max<br>ident |
|---------------------------------------------|--------------------------------------------------------|-----------------|------------|--------------|
| BX417009.2                                  | BX417009 Homo sapiens PLACENTA Homo sapiens cDNA cl... | 1748            | 0.0        | 99%          |
| AU134300.1                                  | AU134300 OVARC1 Homo sapiens cDNA clone OVARC100168... | 1443            | 0.0        | 99%          |
| AU138502.1                                  | AU138502 PLACE1 Homo sapiens cDNA clone PLACE100869... | 1310            | 0.0        | 98%          |
| CA421424.1                                  | UI-H-EZ1-bbb-c-06-0-UI.s1 NCI_CGAP_Ch2 Homo sapiens... | 1286            | 0.0        | 100%         |
| AI764962.1                                  | wh57a06.x1 NCI_CGAP_Kid11 Homo sapiens cDNA clone I... | 1206            | 0.0        | 97%          |
| BF107418.1                                  | 601824036F1 NIH_MGC_79 Homo sapiens cDNA clone IMAG... | 1057            | 0.0        | 98%          |
| DB013065.1                                  | DB013065 TESOP2 Homo sapiens cDNA clone TESOP200154... | 1040            | 0.0        | 100%         |
| DB328492.1                                  | DB328492 PLACE6 Homo sapiens cDNA clone PLACE600972... | 950             | 0.0        | 100%         |
| BG231632.1                                  | naf37c05.x1 Soares_NPRMC Homo sapiens cDNA clone IM... | 944             | 0.0        | 100%         |
| BU674442.1                                  | UI-CF-DU0-aab-j-09-0-UI.s1 UI-CF-DU0 Homo sapiens c... | 937             | 0.0        | 100%         |

ALIGNMENTS

|            |     |                                                                                                                                                          |     |
|------------|-----|----------------------------------------------------------------------------------------------------------------------------------------------------------|-----|
| Query      | 1   | AGTGTGAAATCTTCAGAGAAGAAATTTCTCTTAAAGTTCTTTGCAAAAGGTAGAGATAAAGACACTTTTTCAAAANTGGCAATGGTATCAGAATTCCTCAAGCAGGCCTGGTTTATTGAAAANTGAAGAGCAGGAATATGTTCAAACGTGAA | 150 |
| BX417009.2 | 1   | .....                                                                                                                                                    | 139 |
|            |     |                                                                                                                                                          |     |
|            |     | G                                                                                                                                                        |     |
| AU134300.1 | 1   | .....                                                                                                                                                    | 151 |
|            |     |                                                                                                                                                          |     |
|            |     | G                                                                                                                                                        |     |
| AU138502.1 | 1   | .....C.....                                                                                                                                              | 151 |
|            |     |                                                                                                                                                          |     |
|            |     | G                                                                                                                                                        |     |
| BF107418.1 | 1   | .....                                                                                                                                                    | 134 |
|            |     |                                                                                                                                                          |     |
|            |     | G                                                                                                                                                        |     |
| Query      | 151 | GTCATCCAAAGGTGGTCCCGGATCAGCGGTGAGCCCTATCCTACCTTCAATCCATCCTCGGATGTCGCTGCCCTGCATAAGGCCATAATGGTTAAAGGTGGATGAAGCAACCATCATTGACATTCTAACTAAGCGAAACAATGCACA      | 300 |
| BX417009.2 | 140 | .....                                                                                                                                                    | 289 |
| AU134300.1 | 152 | .....                                                                                                                                                    | 301 |
| AU138502.1 | 152 | .....                                                                                                                                                    | 301 |
| BF107418.1 | 135 | .....                                                                                                                                                    | 284 |
| Query      | 301 | GCGTCAACAGATCAAAGCAGCATATCTCCAGGAAACAGGAAAGTAAGTTAGAGTGGTAAATTTAGATATTTAATTTACGATAGTTATACTTAACCATGGATTCGGAAGCACAGTTACCTAGTTCTTTAAGGTTCTAACCACTGTTTTCT    | 450 |
| BX417009.2 | 290 | .....                                                                                                                                                    | 439 |
| AU134300.1 | 302 | .....                                                                                                                                                    | 451 |
| AU138502.1 | 302 | .....                                                                                                                                                    | 451 |
| BF107418.1 | 285 | .....                                                                                                                                                    | 434 |
| Query      | 451 | TCATTACATCTATGATTGGGATTGCAGTGTTTATCCACTTTGTTGCAATTTAATCAATTTTATCAAAATTTCTATTTTATACATTAGTCATCTTGGTGTATATTGTTTGCAGATGGTGTCTCTGGGGACAAATTTTAAATTTGAACGT     | 600 |
| BX417009.2 | 440 | .....                                                                                                                                                    | 589 |
| AU134300.1 | 452 | .....N.....                                                                                                                                              | 601 |
| AU138502.1 | 452 | .....                                                                                                                                                    | 601 |
| BF107418.1 | 435 | .....G.....                                                                                                                                              | 580 |
| DB013065.1 | 1   | .....                                                                                                                                                    | 63  |
| Query      | 601 | AAACATCGAGATTGCTGCTCAATAAAGAATATGGCTGTGATTGAAATGTACTAATATTTAACTGAACGTGTTAATGCTAAATTTTATATATAATTTCTACTTTAAAAATAAGCCTTATGTCTTTTATACAAATATAGTAGTGTCTCT      | 750 |
| BX417009.2 | 590 | .....                                                                                                                                                    | 739 |
| AU134300.1 | 602 | .....N.....                                                                                                                                              | 750 |
| AU138502.1 | 602 | .....A.....G.....N.....G.....N.....C                                                                                                                     | 761 |
|            |     |                                                                                                                                                          |     |
|            |     | G                                                                                                                                                        |     |
|            |     |                                                                                                                                                          |     |
|            |     | C                                                                                                                                                        |     |
|            |     |                                                                                                                                                          |     |
|            |     | A                                                                                                                                                        |     |
|            |     |                                                                                                                                                          |     |
|            |     | A                                                                                                                                                        |     |
|            |     |                                                                                                                                                          |     |
|            |     | C                                                                                                                                                        |     |
|            |     |                                                                                                                                                          |     |
|            |     | A                                                                                                                                                        |     |
|            |     |                                                                                                                                                          |     |
|            |     | NG                                                                                                                                                       |     |
|            |     |                                                                                                                                                          |     |
|            |     | T                                                                                                                                                        |     |
| BF107418.1 | 581 | T..AT.....TG..G....C....                                                                                                                                 | 610 |
| DB013065.1 | 64  | .....                                                                                                                                                    | 214 |
|            |     |                                                                                                                                                          |     |
|            |     | T                                                                                                                                                        |     |
| Query      | 751 | AAAGCAATGAAATTAGAAAACATATATAATTTACAGTATCTGATTATACTGCTTGTATTGTTGAGAAGTACAAACCTCAAGATTGGAAACATGAATATATATTTTAAAGTAATTTTACTTCTGTTTTCTGTTAGCACACAGTCCTCTGTG   | 900 |
| BX417009.2 | 740 | .....                                                                                                                                                    | 889 |
| AU134300.1 | 751 | .....N.....                                                                                                                                              | 798 |
| AU138502.1 | 762 | .....                                                                                                                                                    | 770 |





|            |      |                                                                                                                                                            |      |
|------------|------|------------------------------------------------------------------------------------------------------------------------------------------------------------|------|
| Query      | 1    | AGTGTGAAATCTTCAGAGAAGATTTCTCTTAGTTCTTTGCAAGAAGGTAGAGATAAAGGAAGGTGTGGGAAGGACTTGTGAAATACATATTCGAGGAAAACTATGCACAAGGCCGTGCATTTAAAAATAAACTCCCTAAGGCTGGG         | 150  |
| BU508007.1 | 1    | .....                                                                                                                                                      | 40   |
| AL544231.3 | 19   | ..T.....                                                                                                                                                   | 61   |
| AL541874.3 | 1    | .....                                                                                                                                                      | 35   |
| DC631365.1 | 1    | .....-.....C.C.....                                                                                                                                        | 59   |
| Query      | 151  | GTGAAACCTGCTACGGTCTCGCCAAGTTGACTGTTAATGAATTTGATTCTCAGGTACACTTTTTCAAAAATGGCAATGGTATCAGAATTCCTCAAGCAGGCCCTGGTTTATTGAAAATGAAGAGCAGGAATATGTTCAAACTGTGAAGTCA    | 300  |
| BU508007.1 | 41   | .....\.....N.....                                                                                                                                          | 136  |
| AL544231.3 | 62   | .....                                                                                                                                                      | 156  |
| AL541874.3 | 36   | .....                                                                                                                                                      | 130  |
| DC631365.1 | 60   | .....                                                                                                                                                      | 154  |
| AL553129.3 | 3    | .....A.....                                                                                                                                                | 97   |
| Query      | 301  | TCCAAAGGTGGTCCCGGATCAGCGGTGAGCCCTATCCTACCTTCAATCCATCCTCGGATGTCGCTGCCTTGCATAAGGCCATAATGGTTAAAGGTGTGGATGAAGCAACCATCATTGACATTTCTAACTAAGCGAAACAAATGCACAGCGT    | 450  |
| AL570428.3 | 1088 | .....-T.....                                                                                                                                               | 1063 |
| BU508007.1 | 137  | .....                                                                                                                                                      | 286  |
| AL544231.3 | 157  | .....                                                                                                                                                      | 306  |
| AL541874.3 | 131  | .....                                                                                                                                                      | 280  |
| DC631365.1 | 155  | .....T.....A.....T.....C.....                                                                                                                              | 304  |
| AL553129.3 | 98   | .....                                                                                                                                                      | 248  |
| Query      | 451  | CAACAGATCAAGCAGCATATCTCCAGGAACAGGAAGCCCTGGATGAAACACTGAAGAAAGCCCTTACAGGTACCTTTGAGGAGSTGTGTTTAGCTCTGCTAAAACTCCAGCGCAATTTGATGCTGATGAACCTTCGTCTGCCATG          | 600  |
| AL570428.3 | 1062 | ...-A...-W.....GC.....Y.....                                                                                                                               | 917  |
| BU508007.1 | 287  | .....                                                                                                                                                      | 436  |
| AL576223.3 | 1050 | ...-W...-R...-Y...-R...-D...-WR...-A...-V.....                                                                                                             | 912  |
| AL544231.3 | 307  | .....                                                                                                                                                      | 456  |
| AL570884.3 | 1059 | .....T.....T.....C...Y...W.....RS...W...Y.M...R...T...K...YY...S.W...C.....K...S.....                                                                      | 919  |
| AL574991.3 | 1017 | .....\.....M.....                                                                                                                                          | 912  |
| AL575425.3 | 1037 | .....-R...-K...-RS...-CR...-K.....                                                                                                                         | 930  |
| AL541874.3 | 281  | .....-M...M...KG...C...C.C...S...A                                                                                                                         | 430  |
| DC631365.1 | 305  | .....TG.....G.....                                                                                                                                         | 454  |
| AL553129.3 | 249  | .....                                                                                                                                                      | 398  |
| Query      | 601  | AAGGGCCTTGAACCTGATGAAGATACTCTAATTGAGATTTTGGCATCAAGAACTAAACAAAGAAATCAGAGACATTAAACAGGGTCTACAGAGAGGAACCTGAAGAGAGATCTGGCCAAAGACATAAACCTCAGACACATCTGGAGATTTTCGG | 750  |
| AL570428.3 | 916  | .....M.....W.....                                                                                                                                          | 767  |
| BU508007.1 | 437  | .....                                                                                                                                                      | 586  |
| AL576223.3 | 911  | .....W...MR.....                                                                                                                                           | 762  |
| AL544231.3 | 457  | .....                                                                                                                                                      | 606  |
| AL570884.3 | 918  | .....                                                                                                                                                      | 769  |
| AL574991.3 | 911  | .....                                                                                                                                                      | 762  |
| AL575425.3 | 929  | .....R.....R.....                                                                                                                                          | 780  |
| AL541874.3 | 431  | .....                                                                                                                                                      | 580  |
| DC631365.1 | 455  | .....C...G.....G.....                                                                                                                                      | 604  |
| AL553129.3 | 399  | .....R.....                                                                                                                                                | 548  |
| Query      | 751  | AACGCTTTGCTTCTCTTCTGTAAGGGTGACCGATCTGAGGACTTTGGTGTGAATGAAGACTTGGCTGATTAGATGCCAGGGCCTTGTATGAAGCAGGAGAAAGGAGAAAGGGGACAGACGTAAACGTGTTCAATACCATCCTTACCACC      | 900  |
| AL570428.3 | 766  | .....R.....N.....                                                                                                                                          | 617  |
| BU508007.1 | 587  | .....                                                                                                                                                      | 736  |
| AL576223.3 | 761  | .....                                                                                                                                                      | 612  |
| AL544231.3 | 607  | .....                                                                                                                                                      | 756  |
| AL570884.3 | 768  | .....                                                                                                                                                      | 619  |
| AL574991.3 | 761  | .....                                                                                                                                                      | 612  |
| AL575425.3 | 779  | .....R.....B.....S.....T.....                                                                                                                              | 630  |
| AL541874.3 | 581  | .....                                                                                                                                                      | 730  |
| DC631365.1 | 605  | .....G.....T.....                                                                                                                                          | 754  |
| AL553129.3 | 549  | .....                                                                                                                                                      | 698  |
| Query      | 901  | AGAAGCTATCCACAACCTTCGACAGTGTTCAGAAATACACCAAGTACAGTAAGCATGACATGAACAAAGTTCTGGACCTGGAGTTGAAAGGTGACATTGAGAAATGCCCTACAGCTATCGTGAAGTGCGCCACAAGCAAACAGCTTTC       | 1050 |
| AL570428.3 | 616  | .....A.....                                                                                                                                                | 467  |
| BU508007.1 | 737  | .....                                                                                                                                                      | 886  |
| AL576223.3 | 611  | .....                                                                                                                                                      | 462  |
| AL544231.3 | 757  | .....                                                                                                                                                      | 905  |
| AL570884.3 | 618  | .....                                                                                                                                                      | 469  |
| AL574991.3 | 611  | .....                                                                                                                                                      | 462  |
| AL575425.3 | 629  | .....N.....N.....                                                                                                                                          | 480  |
| AL541874.3 | 731  | .....                                                                                                                                                      | 880  |
| DC631365.1 | 755  | C.....T.....T.....                                                                                                                                         | 904  |
| AL553129.3 | 699  | .....WY.....                                                                                                                                               | 848  |
| Query      | 1051 | TTTGAGAGAGAGCTTCATCAAGCCATGAAAGGTGTTGGAACCTCGCCATAAGGCATTGATCAGGATTATGGTTTCCCGTTCTGAAATTGACATGAATGATATCAAGCATTCATCAGAAGATGTATGGTATCTCCCTTTGCCAAGCCATC      | 1200 |
| AL570428.3 | 466  | .....A.....T.....                                                                                                                                          | 317  |
| BU508007.1 | 887  | .....C.....G...G.....C..T...                                                                                                                               | 1037 |

|            |      |                                                                                                                                                       |      |
|------------|------|-------------------------------------------------------------------------------------------------------------------------------------------------------|------|
| AL576223.3 | 461  | .....G.....T.....C.....                                                                                                                               | 312  |
| AL544231.3 | 906  | .....G.W.....MWY.....MWY.                                                                                                                             | 1053 |
| AL570884.3 | 468  | .....                                                                                                                                                 | 319  |
| AL574991.3 | 461  | .....W..                                                                                                                                              | 312  |
| AL575425.3 | 479  | .....                                                                                                                                                 | 330  |
| AL541874.3 | 881  | .....W..K.....M..                                                                                                                                     | 1023 |
| DC631365.1 | 905  | .....A.....G.....C.....A.....                                                                                                                         | 1053 |
| AL553129.3 | 849  | .....G.....R.....Y.....M.....                                                                                                                         | 991  |
| Query      | 1201 | CTGGATGAAACCAAAGGAGATTATGAGAAAATCCTGGTGGCTCTTTGTGGAGGAACTAAACATTCCCTTGATGGTCTCAAGCTATGATCAGAAGACTTTAATTATATATTTTCATCCTATAAGCTTAAATAGGAAAGTTTCTTCAACAG | 1350 |
| AL570428.3 | 316  | .....                                                                                                                                                 | 167  |
| BU508007.1 | 1038 | ..G.....C....GA...T...TA.....C...C....                                                                                                                | 1123 |
| AL576223.3 | 311  | .....G.....A.....T.....AG.....                                                                                                                        | 162  |
| AL544231.3 | 1054 | .....R.....Y..K.....K...R....                                                                                                                         | 1102 |
| AL570884.3 | 318  | .....                                                                                                                                                 | 169  |
| AL574991.3 | 311  | .....Y.....                                                                                                                                           | 162  |
| AL575425.3 | 329  | .....                                                                                                                                                 | 180  |
| AL541874.3 | 1024 | .....                                                                                                                                                 | 1029 |
| DC631365.1 | 1054 | .....A.....CA...G...C...C...C.....                                                                                                                    | 1176 |
| AL553129.3 | 992  | .....W.....A.....                                                                                                                                     | 1003 |
| Query      | 1351 | GATTACAGTGTAGCTACCTACATGCTGAAAAATATAGCCTTTAAATCATTTTTATATTATAACTCTGTATAATAGAGATAAGTCCATTTTAAAAATGTTTTCCCAACCATATAAACCCTATACAAGTTGTTCTAGTAACAATACATG   | 1500 |
| AL570428.3 | 166  | .....T.....                                                                                                                                           | 17   |
| AL576223.3 | 161  | .....B.....                                                                                                                                           | 12   |
| AL570884.3 | 168  | .....RW...V.....N...N...W.....                                                                                                                        | 17   |
| AL574991.3 | 161  | .....N.....                                                                                                                                           | 12   |
| AL575425.3 | 179  | .....N.....                                                                                                                                           | 30   |
| DC631365.1 | 1177 | .....C.....T.....C.....A.....                                                                                                                         | 1216 |
| Query      | 1501 | AGAAAGATGTCTATGT                                                                                                                                      | 1516 |
| AL570428.3 | 16   | .....                                                                                                                                                 | 1    |
| AL576223.3 | 11   | .....                                                                                                                                                 | 1    |
| AL570884.3 | 16   | .....A.....                                                                                                                                           | 1    |
| AL574991.3 | 11   | .....                                                                                                                                                 | 1    |
| AL575425.3 | 29   | .....G.....                                                                                                                                           | 17   |

Query= N13-17 [organism=Homo sapiens] anxa1

Length=1234

| Sequences producing significant alignments:                       | Score (Bits) | E Value | Max ident |
|-------------------------------------------------------------------|--------------|---------|-----------|
| BQ228162.1 AGENCOURT_7258587 NIH_MGC_71 Homo sapiens cDNA clon... | 1679         | 0.0     | 99%       |
| AL574991.3 AL574991 Homo sapiens PLACENTA COT 25-NORMALIZED Ho... | 1648         | 0.0     | 100%      |
| AL576603.2 AL576603 Homo sapiens PLACENTA COT 25-NORMALIZED Ho... | 1635         | 0.0     | 99%       |
| AL576223.3 AL576223 Homo sapiens PLACENTA COT 25-NORMALIZED Ho... | 1633         | 0.0     | 99%       |
| BM555842.1 AGENCOURT_6544353 NIH_MGC_88 Homo sapiens cDNA clon... | 1633         | 0.0     | 99%       |
| AL570428.3 AL570428 Homo sapiens PLACENTA COT 25-NORMALIZED Ho... | 1629         | 0.0     | 99%       |
| AL576340.3 AL576340 Homo sapiens PLACENTA COT 25-NORMALIZED Ho... | 1628         | 0.0     | 99%       |
| AL570884.3 AL570884 Homo sapiens PLACENTA COT 25-NORMALIZED Ho... | 1628         | 0.0     | 99%       |
| AL575425.3 AL575425 Homo sapiens PLACENTA COT 25-NORMALIZED Ho... | 1615         | 0.0     | 99%       |
| AL553095.3 AL553095 Homo sapiens PLACENTA COT 25-NORMALIZED Ho... | 1589         | 0.0     | 98%       |

# ALIGNMENTS

|            |     |                                                                                                                                                        |     |
|------------|-----|--------------------------------------------------------------------------------------------------------------------------------------------------------|-----|
| Query      | 308 | AACTGATGAAGATACTCTAATTGAGATTTTGGCATCAAGAACTAACAAAGAAATCAGAGACATTAACAGGGTCTACAGAGAGAACTGAAGAGAGATCTGGCCAAAGACATAACTCAGACACATCTGGAGATTTTCGGAACGCTTTTGCTT | 457 |
| BQ228162.1 | 36  | .....C.....                                                                                                                                            | 186 |
| AL574991.3 | 900 | .....                                                                                                                                                  | 750 |





[illegible]

[illegible]

Query 3601 TCCATTTTTTAAAAATGTTTTCCCAAAACCATAAAACCCCTATACAAGTTGTTCTAGTAACAATACATGAGAAAGATGTCATGTAGCTGAAAATAAAATGACGTCAC 3707  
CA414448.1 130 .....N..... 24  
CB321626.1 128 ..... 22

Query= N15-2 [organism=Homo sapiens] anxl

Length=961

| Sequences producing significant alignments: |                                                        | Score<br>(Bits) | E<br>Value | Max<br>ident |
|---------------------------------------------|--------------------------------------------------------|-----------------|------------|--------------|
| BQ228162.1                                  | AGENCOURT_7258587 NIH_MGC_71 Homo sapiens cDNA clon... | 1591            | 0.0        | 99%          |
| AL576603.2                                  | AL576603 Homo sapiens PLACENTA COT 25-NORMALIZED Ho... | 1567            | 0.0        | 100%         |
| AL576340.3                                  | AL576340 Homo sapiens PLACENTA COT 25-NORMALIZED Ho... | 1565            | 0.0        | 100%         |
| AL576223.3                                  | AL576223 Homo sapiens PLACENTA COT 25-NORMALIZED Ho... | 1563            | 0.0        | 100%         |
| AL574991.3                                  | AL574991 Homo sapiens PLACENTA COT 25-NORMALIZED Ho... | 1559            | 0.0        | 100%         |
| BM555842.1                                  | AGENCOURT_6544353 NIH_MGC_88 Homo sapiens cDNA clon... | 1554            | 0.0        | 99%          |
| AL570428.3                                  | AL570428 Homo sapiens PLACENTA COT 25-NORMALIZED Ho... | 1543            | 0.0        | 99%          |
| AL570884.3                                  | AL570884 Homo sapiens PLACENTA COT 25-NORMALIZED Ho... | 1539            | 0.0        | 99%          |
| AL575425.3                                  | AL575425 Homo sapiens PLACENTA COT 25-NORMALIZED Ho... | 1526            | 0.0        | 99%          |
| BE614257.1                                  | 601504294T1 NIH_MGC_71 Homo sapiens cDNA clone IMAG... | 1520            | 0.0        | 98%          |

#### ALIGNMENTS

|            |     |                                                                                                                                                       |     |
|------------|-----|-------------------------------------------------------------------------------------------------------------------------------------------------------|-----|
| Query      | 86  | ATCAGAGACATTAACAGGGTCTACAGAGAGAACTGAAGAGAGATCTGGCCAAAGACATAACCTCAGACACATCTGGAGATTTTCGGAACGCTTTGCTTTCTCTTGCTAAGGGTGACCGATCTGAGGACTTTGGTGTGAATGAAGACTTG | 235 |
| BQ228162.1 | 88  | .....                                                                                                                                                 | 237 |
| AL576603.2 | 855 | .....                                                                                                                                                 | 706 |
| AL576340.3 | 859 | .....                                                                                                                                                 | 710 |
| AL576223.3 | 848 | .....                                                                                                                                                 | 699 |
| AL574991.3 | 848 | .....                                                                                                                                                 | 699 |
| BM555842.1 | 47  | .....                                                                                                                                                 | 196 |
| AL570428.3 | 853 | .....W.....                                                                                                                                           | 704 |
| AL570884.3 | 855 | .....                                                                                                                                                 | 706 |
| AL575425.3 | 866 | .....R.....                                                                                                                                           | 717 |
| BE614257.1 | 867 | .....-..-..A.T.....A.....C.....-..                                                                                                                    | 719 |

                  \  
                  |  
                  A                                          \  
                                                                  |  
                                                                  G

|            |     |                                                                                                                                                    |     |
|------------|-----|----------------------------------------------------------------------------------------------------------------------------------------------------|-----|
| Query      | 236 | GCTGATTGATGCCAGGGCCTTGTATGAAGCAGGAGAAAGGAGAAAGGGGACAGACGTAACCGTGTTCATACCATCCTTACCACCAGAAGCTATCCACAACCTTCGAGAGTGTTCAGAAATACACCAAGTACAGTAAGCATGACATG | 385 |
| BQ228162.1 | 238 | .....                                                                                                                                              | 387 |
| AL576603.2 | 705 | .....                                                                                                                                              | 556 |
| AL576340.3 | 709 | .....                                                                                                                                              | 560 |
| AL576223.3 | 698 | .....                                                                                                                                              | 549 |
| AL574991.3 | 698 | .....                                                                                                                                              | 549 |
| BM555842.1 | 197 | .....                                                                                                                                              | 346 |
| AL570428.3 | 703 | .....N.....                                                                                                                                        | 554 |
| AL570884.3 | 705 | .....                                                                                                                                              | 556 |
| AL575425.3 | 716 | ...S.....T.....                                                                                                                                    | 567 |
| BE614257.1 | 718 | .....                                                                                                                                              | 569 |

|            |     |                                                                                                                                                      |     |
|------------|-----|------------------------------------------------------------------------------------------------------------------------------------------------------|-----|
| Query      | 386 | AACAAAGTTCTGGACCTGGAGTTGAAAGGTGACATTGAGAAATGCCTCACAGCTATCGTGAAGTGCGCCACAAGCAAACCCAGCTTTCTTTGAGAGAGCTTCATCAAGCCATGAAAGGTGTGGAACTCGCCATAAGGCATTGATCAGG | 535 |
| BQ228162.1 | 388 | .....                                                                                                                                                | 537 |
| AL576603.2 | 555 | .....                                                                                                                                                | 406 |
| AL576340.3 | 559 | .....                                                                                                                                                | 410 |
| AL576223.3 | 548 | .....                                                                                                                                                | 399 |
| AL574991.3 | 548 | .....                                                                                                                                                | 399 |
| BM555842.1 | 347 | .....                                                                                                                                                | 496 |
| AL570428.3 | 553 | .....                                                                                                                                                | 404 |
| AL570884.3 | 555 | .....                                                                                                                                                | 406 |
| AL575425.3 | 566 | .....N.....                                                                                                                                          | 417 |
| BE614257.1 | 568 | .....                                                                                                                                                | 419 |

|            |     |                                                                                                                                                       |     |
|------------|-----|-------------------------------------------------------------------------------------------------------------------------------------------------------|-----|
| Query      | 536 | ATTATGGTTTCCCGTCTCGAATTGACATGAATGATATCAAAGCATTTCTATCAGAAGATGTATGGTATCTGCCCTTTGCCAAGCCATCCTGGATGAAACCAAAGGAGATTATGAGAAAATCCTGGTGGCTCTTTGTGAGGAACTAAACA | 685 |
| BQ228162.1 | 538 | .....                                                                                                                                                 | 687 |
| AL576603.2 | 405 | .....                                                                                                                                                 | 256 |
| AL576340.3 | 409 | .....R.....R.....                                                                                                                                     | 260 |
| AL576223.3 | 398 | .....                                                                                                                                                 | 249 |
| AL574991.3 | 398 | .....W.....                                                                                                                                           | 249 |
| BM555842.1 | 497 | .....                                                                                                                                                 | 646 |
| AL570428.3 | 403 | .....A.....T.....                                                                                                                                     | 254 |
| AL570884.3 | 405 | .....                                                                                                                                                 | 256 |
| AL575425.3 | 416 | .....                                                                                                                                                 | 267 |
| BE614257.1 | 418 | .....                                                                                                                                                 | 269 |

|            |     |                                                                                                                                                    |     |
|------------|-----|----------------------------------------------------------------------------------------------------------------------------------------------------|-----|
| Query      | 686 | TTCCCTTGATGGTCTCAAGCTATGATCAGAAGACTTTAATTATATATTTTCATCCTATAAGCTTAAATAGGAAAGTTTCTTCAACAGGATTACAGTGTAGCTACATGCTGAAAAATATAGCCTTTAAATCATTTTTATATTATAAC | 835 |
| BQ228162.1 | 688 | .....                                                                                                                                              | 838 |

                  \  
                  |  
                  A

|            |     |       |     |
|------------|-----|-------|-----|
| AL576603.2 | 255 | ..... | 106 |
|------------|-----|-------|-----|

AL576340.3 259 ..... 110  
AL576223.3 248 ..... 99  
AL574991.3 248 .....Y..... 99  
BM555842.1 647 ..... 796  
AL570428.3 253 ..... 104  
AL570884.3 255 ..... 106  
AL575425.3 266 .....N..... 117  
BE614257.1 268 ..... 119

Query 836 TCTGTATAATAGATAAGTCCATTTTAAAAATGTTTCCCAAAACCATAAAACCTATACAAGTTGTTCTAGTAACAATACATGAGAAAGATGTCATGTAGCTGAAAAATAAATGACGTC 959  
BQ228162.1 839 .....G..... 965

AL576603.2 105 .....G.....A..... 1  
AL576340.3 109 .....C..... 5  
AL576223.3 98 .....B..... 1  
AL574991.3 98 ..... 1  
BM555842.1 797 .....G..... 922

AL570428.3 103 .....T..... 1  
AL570884.3 105 .....RW.....V..... 1

AL575425.3 116 .....G..... 17  
BE614257.1 118 .....T.A..... 6

Query= N16-14 [organism=Homo sapiens] anxa1  
Length=2873

| Sequences producing significant alignments: |                    |                                               |      | Score<br>(Bits) | E<br>Value | Max<br>ident |
|---------------------------------------------|--------------------|-----------------------------------------------|------|-----------------|------------|--------------|
| AL544959.3                                  | AL544959           | Homo sapiens PLACENTA COT 25-NORMALIZED Ho... | 1701 | 0.0             | 100%       |              |
| BX438944.2                                  | BX438944           | Homo sapiens PLACENTA Homo sapiens cDNA cl... | 1698 | 0.0             | 100%       |              |
| AL551427.3                                  | AL551427           | Homo sapiens PLACENTA COT 25-NORMALIZED Ho... | 1696 | 0.0             | 100%       |              |
| AL540651.3                                  | AL540651           | Homo sapiens PLACENTA Homo sapiens cDNA cl... | 1692 | 0.0             | 100%       |              |
| AL551980.3                                  | AL551980           | Homo sapiens PLACENTA COT 25-NORMALIZED Ho... | 1687 | 0.0             | 100%       |              |
| AL544231.3                                  | AL544231           | Homo sapiens PLACENTA COT 25-NORMALIZED Ho... | 1685 | 0.0             | 100%       |              |
| AL541874.3                                  | AL541874           | Homo sapiens PLACENTA Homo sapiens cDNA cl... | 1683 | 0.0             | 100%       |              |
| BU902298.1                                  | AGENCOURT_10127317 | NIH_MGC_71 Homo sapiens cDNA clo...           | 1683 | 0.0             | 99%        |              |
| BU508007.1                                  | AGENCOURT_10128424 | NIH_MGC_71 Homo sapiens cDNA clo...           | 1681 | 0.0             | 100%       |              |
| AL553114.3                                  | AL553114           | Homo sapiens PLACENTA COT 25-NORMALIZED Ho... | 1674 | 0.0             | 99%        |              |

ALIGNMENTS

|            |     |                                                                                                                                                        |     |
|------------|-----|--------------------------------------------------------------------------------------------------------------------------------------------------------|-----|
| Query      | 1   | TGTGAAATCTTCAGAGAAGAATTTCTCTTTAGTTCTTTGCAAGAAGGTAGAGATAAAGACACTTTTTCAAAAATGGCAATGGTATCAGAATTCCTCAAGCAGGCCTGGTTTATTGAAAAATGAAGAGCAGGAATATGTTCAAAC       | 150 |
| AL544959.3 | 1   | .....                                                                                                                                                  | 144 |
| BX438944.2 | 1   | .....                                                                                                                                                  | 135 |
| AL551427.3 | 1   | ..T.....                                                                                                                                               | 137 |
| AL540651.3 | 19  | ..T.....                                                                                                                                               | 153 |
| AL551980.3 | 22  | .....                                                                                                                                                  | 154 |
| AL544231.3 | 19  | ..T.....                                                                                                                                               | 153 |
| AL541874.3 | 1   | .....                                                                                                                                                  | 127 |
| BU902298.1 | 24  | .....                                                                                                                                                  | 166 |
| BU508007.1 | 1   | .....                                                                                                                                                  | 133 |
| AL553114.3 | 109 | .....                                                                                                                                                  | 258 |
| Query      | 151 | TCATCCAAAGGTGGTCCCGGATCAGCGGTGAGCCCTTATCTCTACCTTCAATCCATCTCGGATGTCGCTGCCTTGCAATAAGGCCATAATGGTTAAAGGTGGATGAAGCAACCATCATTTGACATTCTAACTAAGCGAAACAATGCACAG | 300 |
| AL544959.3 | 145 | .....                                                                                                                                                  | 294 |
| BX438944.2 | 136 | .....                                                                                                                                                  | 285 |
| AL551427.3 | 138 | .....                                                                                                                                                  | 287 |



|                                                                                |      |                                                                                                                                                          |      |
|--------------------------------------------------------------------------------|------|----------------------------------------------------------------------------------------------------------------------------------------------------------|------|
| AL540651.3                                                                     | 154  | .....                                                                                                                                                    | 303  |
| AL551980.3                                                                     | 155  | .....                                                                                                                                                    | 304  |
| AL544231.3                                                                     | 154  | .....                                                                                                                                                    | 303  |
| AL541874.3                                                                     | 128  | .....                                                                                                                                                    | 277  |
| BU902298.1                                                                     | 167  | .....                                                                                                                                                    | 316  |
| BU508007.1                                                                     | 134  | .....                                                                                                                                                    | 283  |
| AL553114.3                                                                     | 259  | .....                                                                                                                                                    | 408  |
| Query                                                                          | 301  | CGTCAACAGATCAAAGCAGCATATCTCCAGGAAACAGGAAGCCCCGGATGAACACTGAAGAAGCCCTTACAGGTACCTTGAGGAGGTGTTTTAGCTCTGCTAAAACTCCAGCGCAATTTGATGCTGATGAACCTTCGTGCTGCC         | 450  |
| AL544959.3                                                                     | 295  | .....                                                                                                                                                    | 444  |
| BX438944.2                                                                     | 286  | .....                                                                                                                                                    | 435  |
| AL551427.3                                                                     | 288  | .....                                                                                                                                                    | 437  |
| AL540651.3                                                                     | 304  | .....                                                                                                                                                    | 453  |
| AL551980.3                                                                     | 305  | .....                                                                                                                                                    | 454  |
| AL544231.3                                                                     | 304  | .....                                                                                                                                                    | 453  |
| AL541874.3                                                                     | 278  | .....                                                                                                                                                    | 427  |
| BU902298.1                                                                     | 317  | .....                                                                                                                                                    | 466  |
| BU508007.1                                                                     | 284  | .....                                                                                                                                                    | 433  |
| AL553114.3                                                                     | 409  | .....                                                                                                                                                    | 558  |
| Query                                                                          | 451  | ATGAAGGCCCTTGGAACTGATGAAGATACTCTAATTGAGATTTTGGCATCAAGAATAACAAAGAAATCAGAGACATTAAACGGGTCTACAGAGAGGAACCTGAAGAGAGATCTGGCCAAAGACATAACCTCAGACACATCTGGAGATTTT   | 600  |
| AL544959.3                                                                     | 445  | .....                                                                                                                                                    | 594  |
| BX438944.2                                                                     | 436  | .....                                                                                                                                                    | 585  |
| AL551427.3                                                                     | 438  | .....                                                                                                                                                    | 587  |
| AL540651.3                                                                     | 454  | .....                                                                                                                                                    | 603  |
| AL551980.3                                                                     | 455  | .....                                                                                                                                                    | 604  |
| AL544231.3                                                                     | 454  | .....                                                                                                                                                    | 603  |
| AL541874.3                                                                     | 428  | .....                                                                                                                                                    | 577  |
| BU902298.1                                                                     | 467  | .....                                                                                                                                                    | 616  |
| BU508007.1                                                                     | 434  | .....                                                                                                                                                    | 583  |
| AL553114.3                                                                     | 559  | .....                                                                                                                                                    | 708  |
| Query                                                                          | 601  | CGGAACGCTTTGCTTTTCTCTTGCTAAGGGTGACCGATCTGAGGACTTTGGTGTGAATGAAGACTTTGGCTGATTGAGATGCCAGGGCCCTTGATGAAGCAGGAGAAAGGAGAAAGGGGACAGACGTAAACGTGTTCAATACCATCCTTACC | 750  |
| AL544959.3                                                                     | 595  | .....                                                                                                                                                    | 744  |
| BX438944.2                                                                     | 586  | .....                                                                                                                                                    | 735  |
| AL551427.3                                                                     | 588  | .....                                                                                                                                                    | 737  |
| AL540651.3                                                                     | 604  | .....                                                                                                                                                    | 753  |
| AL551980.3                                                                     | 605  | .....                                                                                                                                                    | 754  |
| AL544231.3                                                                     | 604  | .....                                                                                                                                                    | 753  |
| AL541874.3                                                                     | 578  | .....                                                                                                                                                    | 727  |
| BU902298.1                                                                     | 617  | .....                                                                                                                                                    | 766  |
| BU508007.1                                                                     | 584  | .....                                                                                                                                                    | 733  |
| AL553114.3                                                                     | 709  | .....                                                                                                                                                    | 858  |
| Query                                                                          | 751  | ACCAGAAGCTATCCACAACCTCGCAGAGTGTTTCAGAAATACACCAAGTACAGTAAGCATGACATGAACAAGTTCTCGACCTGGAGTTGAAAGGTGACATTGAGAATGCCTCAGACTATCGTGAAGTGCGCCACAAGCAACCAGCT       | 900  |
| AL544959.3                                                                     | 745  | .....M.....M.....                                                                                                                                        | 895  |
| <div style="text-align: center;">       T<br/>        <br/>       T     </div> |      |                                                                                                                                                          |      |
| BX438944.2                                                                     | 736  | .....                                                                                                                                                    | 885  |
| AL551427.3                                                                     | 738  | .....                                                                                                                                                    | 887  |
| AL540651.3                                                                     | 754  | .....                                                                                                                                                    | 903  |
| AL551980.3                                                                     | 755  | .....W.....M.....                                                                                                                                        | 904  |
| AL544231.3                                                                     | 754  | .....                                                                                                                                                    | 902  |
| AL541874.3                                                                     | 728  | .....                                                                                                                                                    | 877  |
| BU902298.1                                                                     | 767  | .....A.....TG.....                                                                                                                                       | 916  |
| BU508007.1                                                                     | 734  | .....                                                                                                                                                    | 883  |
| AL553114.3                                                                     | 859  | .....W.....-.....-.....                                                                                                                                  | 1005 |
| Query                                                                          | 901  | TTCTTTGCAGAGAAGCTTCATCAAGCCATGAAAGATGTACCATTCTACTTATATGTCCTGCTTAGAGGAAGAATTATTGTGAGAAAGACAGAAAACCTCATGTTGTTGAAAATCTCACATTTAATATCTCCATTAAATGAGAATCA       | 1050 |
| AL544959.3                                                                     | 896  | .....                                                                                                                                                    | 929  |
| BX438944.2                                                                     | 886  | .....                                                                                                                                                    | 919  |
| AL551427.3                                                                     | 888  | .....                                                                                                                                                    | 921  |
| AL540651.3                                                                     | 904  | .....                                                                                                                                                    | 937  |
| AL551980.3                                                                     | 905  | .....                                                                                                                                                    | 938  |
| AL544231.3                                                                     | 903  | .....                                                                                                                                                    | 936  |
| AL541874.3                                                                     | 878  | .....                                                                                                                                                    | 911  |
| BU902298.1                                                                     | 917  | ...C.....                                                                                                                                                | 950  |
| BU508007.1                                                                     | 884  | .....-.....                                                                                                                                              | 916  |
| AL553114.3                                                                     | 1006 | .....-.....-.....M.....                                                                                                                                  | 1036 |
| Query                                                                          | 1051 | TTGTCTATTGATGAAAGAGGTAATACACTACCTTCTCAGATAAACTTCTGTAGATTGCGTGCTtttttttACAGATGAGATTGTAAGTGAGCCTGTAAGTGATTTACGGCTCACTTGTGATTTGCTTAAACATGTGTACCACG          | 1200 |
| Query                                                                          | 1201 | GGAAGGGTGATGACTTTCTTTTTTAACGTGTAATTTTAGTGGCCTACTTCTCTAAGGTGTGAGTTTATAATCTCCACTTTATGAGTCTGATTTGTTGTTTTATTATTCTGTCTTTTATGCCACAGATTAAATAGTTGAACTTTT         | 1350 |
| Query                                                                          | 1351 | GAAATGTCATTCTATGATTAAAGGATGTAGAATGATGATTTTGAGATCAACTATGTCACTTTAACTTTACTGTCTGACATGCATGGTATTATACAAGGTACCTCTTCTATTCTGACATTTTGAGCCCACAAATGAATAGTTATGAAGTTAT  | 1500 |
| Query                                                                          | 1501 | CTTCCTTTTTCTTTGACAGTCCAAAATAAGGAGGTTTTTCagagagagagagaAAGAAAGATCTAACtatttgaataatatgaaggaatatatttgaatatatatgaataatttgaataatatgaatgataGACATGCTAGGTACTGCTC   | 1650 |
| Query                                                                          | 1651 | TGTAGTGGTTAGCATAGTTGCTGCCCCCTTCTGCCATAGTCTAGTGTGATATTTCGTGGGTAATGATGAATACCTGGTCCATGGAAGAGAAAGTGGGACATATACTCCAGACTTTGGAATCCAGGTAGCATTGCTGTGAGCTAAA        | 1800 |
| Query                                                                          | 1801 | TTAACACCTGAAGTTTAAATAGAAATGAGCCAGATGAGGGCAAGAGTGGAAGAGATGGGATAAAGCAAGGGTGGTCCANGAGGAAGAAGTAACCCACACACAGGCTTGAAAGGCAAAGGTAACATAACCTTCTCAAGACAGTAAGTATA    | 1950 |

Query= N17-2 [organism=Homo sapiens] anxa1  
Length=988

## ALIGNMENTS

```

Query      545  CATAAGGCATTGATCAGGATTATGGTTTCCCGTTCTGAAATTGACATGAATGATATCAAAGCATTCTATCAGAAGATGTATGGTATCTCCCTTTGCCAGCCATCCTGGATGAAACCAAAGGAGATTATGAGAAAATCCTGGTGGCTCTT 694
BQ228162.1 520  ..... 669
AL576603.2 423  ..... 274
AL576223.3 416  ..... 267
AL576340.3 427  .....R.....R..... 278
AL574991.3 416  .....W..... 267
BM555842.1 479  .....A.....T..... 628
AL570428.3 421  ..... 272
AL570884.3 423  ..... 274
AL575425.3 434  ..... 285
BU838395.1 477  .....N.....N.....N.....N..... 625

Query      695  TGTGGAGGAAACTAAACATTCCCTTGATGGTCTCAAGCTATGATCAGAAGACTTTAAATTATATATTTTCATCCTATAAGCTTAAATAGGAAAGTTTCTTCAACAGGATTACAGTGTAGCTACCTACATGCTGAAAAATATAGCCTTTAAA 844
BQ228162.1 670  ..... 820

                                \
                                |
                                A

AL576603.2 273  ..... 124
AL576223.3 266  ..... 117
AL576340.3 277  ..... 128
AL574991.3 266  .....Y..... 117
BM555842.1 629  ..... 778
AL570428.3 271  ..... 122
AL570884.3 273  ..... 124
AL575425.3 284  .....N..... 135
BU838395.1 626  .....T.....-.....C..... 772

Query      845  TCATTTTATATTAATACTCTGTATATAGAGATAAGTCCATTTTAAAAATGTTTCCCCAAACCATAAACCCCTATACAAGTTGTTCTAGTAAACATACATGAGAAAGATGTCTATGTAGCTGAAAAATAAATGACGTC 986
BQ228162.1 821  .....G..... 965

                                \
                                |
                                G

                                \
                                |
                                G

                                \
                                |
                                A

AL576603.2 123  ..... 1

                                \
                                |
                                C

AL576223.3 116  .....B..... 1
AL576340.3 127  ..... 5

                                \
                                |
                                N

AL574991.3 116  ..... 1
BM555842.1 779  .....G..... 922

                                \
                                |
                                A

                                \
                                |
                                C

                                \
                                |
                                C

                                \
                                |
                                N

                                \
                                |
                                C

                                \
                                |
                                N

                                \
                                |
                                A

                                \
                                |
                                C

                                \
                                |
                                G

AL570428.3 121  .....T..... 1
AL570884.3 123  .....RW...V.....N...N...W.....A..... 1

                                \
                                |
                                N

                                \
                                |
                                N

AL575425.3 134  ..... 17
BU838395.1 773  .....C.....NC..N..N.....G.....N..... 908

```

Database: Database of GenBank+EMBL+DDBJ sequences from EST Divisions  
 Posted date: Feb 24, 2019 1:46 AM  
 Number of letters in database: 43,200,890,307  
 Number of sequences in database: 77,566,966

```

Lambda      K      H
1.33      0.621    1.12
Gapped
Lambda      K      H
1.28      0.460    0.850
Matrix: blastn matrix:1 -2
Gap Penalties: Existence: 0, Extension: 0
Number of Sequences: 77566966
Number of Hits to DB: 2901464
Number of extensions: 648
Number of successful extensions: 648
Number of sequences better than 10: 24
Number of HSP's better than 10 without gapping: 0
Number of HSP's gapped: 514
Number of HSP's successfully gapped: 514
Length of database: 43200890307
A: 0
X1: 13 (25.0 bits)
X2: 32 (59.1 bits)
X3: 54 (99.7 bits)
S1: 13 (25.1 bits)

```
